# Supplementary material for: Signatures of conserved and unique molecular features in Afrotheria
Source: Springer Nature journal article supplement (doi:10.1038/s41598-020-79559-6), 2021-01-13
Supplement: MOESM2 [file 41598_2020_79559_MOESM2_ESM.xls]

## Sheet: S2A-Func_prediction
Includes Supplementary tables S2A, S2B
Table S2A- Molecular features and inferred function of Afrotheria-specific uncharacterized proteins
~ connects two adjacent domains
green: inferred function
Protein RefSeq ID	Protein length (aa)	Species	Protein description	Pfam domain name	Superfamily	PRINTS	PROSITE	MOBIDB	List of Afrotheria species having orthologs	Inferred function	GO term	parent GO term	Potential molecular function
XP_010597052.1	104	L.africana	uncharacterized protein LOC100659857 isoform X1 [Loxodonta africana]	UCR_UQCRX_QCR9	Subunit_X_(non-heme_7_kDa_protein)_of_cytochrome_bc1_complex_(Ubiquinol-cytochrome_c_reductase)	-	-	-	C.asiatica;E.edwardii;E.telfairi;O.afer;T.manatus	cytochrome c oxidase assembly factor 1 homolog	-	-	-
XP_023395653.1	282	L.africana	uncharacterized protein LOC100655590 isoform X1 [Loxodonta africana]	Gal-bind_lectin	Concanavalin_A-like_lectins/glucanases	-	Galactoside-binding_lectin_(galectin)_domain	consensus_disorder~consensus_disorder	C.asiatica;E.telfairi;T.manatus	PREDICTED: galectin-7	GO:0030246	GO:0030246	carbohydrate binding
XP_023396087.1	572	L.africana	uncharacterized protein LOC111748323 [Loxodonta africana]	-	RING/U-box~RING/U-box	-	TRIAD_supradomain	consensus_disorder~consensus_disorder~consensus_disorder~consensus_disorder~consensus_disorder	C.asiatica;E.edwardii;O.afer;T.manatus	E3 ubiquitin-protein ligase ARIH2-like	-	-	-
XP_023398459.1	259	L.africana	uncharacterized protein LOC104847364 [Loxodonta africana]	V-set	Immunoglobulin	-	Ig-like_domain	-	E.telfairi;O.afer	afrotheria-specific Ig-like protein	-	-	-
XP_023400400.1	235	L.africana	uncharacterized protein LOC100660845 [Loxodonta africana]	Coa1	-	-	-	-	T.manatus	cytochrome c oxidase assembly factor 1 homolog	-	-	-
XP_023412276.1	320	L.africana	uncharacterized protein LOC111752568 [Loxodonta africana]	-	-	-	-	consensus_disorder~consensus_disorder~consensus_disorder~consensus_disorder	E.telfairi	PREDICTED: heterogeneous nuclear ribonucleoprotein C-like	-	-	-
XP_023414955.1	513	L.africana	uncharacterized protein LOC104846770 [Loxodonta africana]	TLV_coat	Virus_ectodomain	-	-	-	E.edwardii;E.telfairi;O.afer;T.manatus	afrotheria-specific protein	-	-	-
XP_023415755.1	405	L.africana	uncharacterized protein LOC100663177 [Loxodonta africana]	APOBEC_N	-	-	-	consensus_disorder	E.edwardii;O.afer;T.manatus	PREDICTED: DNA dC-_dU-editing enzyme APOBEC-3B-like	-	-	-
XP_012410384.1	577	T.manatus	uncharacterized protein LOC105756190 [Trichechus manatus latirostris]	EF-hand_8	-	-	EF-hand_calcium-binding_domain	consensus_disorder~consensus_disorder~consensus_disorder~consensus_disorder~consensus_disorder	C.asiatica;E.telfairi;O.afer	PREDICTED: EF-hand calcium-binding domain-containing protein 3-like	GO:0005509	GO:0046872	metal ion binding
XP_023591617.1	237	T.manatus	uncharacterized protein LOC111821421 isoform X1 [Trichechus manatus latirostris]	MOEP19	-	-	-	consensus_disorder	C.asiatica;E.edwardii;L.africana	PREDICTED: oocyte-expressed protein homolog	GO:0003723	GO:0003676	nucleic acid binding
XP_023588918.1	321	T.manatus	uncharacterized protein LOC111820948 [Trichechus manatus latirostris]	KRAB	-	-	Krueppel-associated_box_(KRAB)	consensus_disorder~consensus_disorder~consensus_disorder~consensus_disorder	C.asiatica;E.edwardii;O.afer	PREDICTED: zinc finger protein	GO:0003676	GO:0003676	nucleic acid binding
XP_023584098.1	359	T.manatus	uncharacterized protein LOC101346789 [Trichechus manatus latirostris]	-	-	-	-	-	C.asiatica;E.telfairi;L.africana	PREDICTED: NKG2D ligand 1-like	-	-	-
XP_023597381.1	214	T.manatus	uncharacterized protein LOC111822632 [Trichechus manatus latirostris]	UPAR_LY6	-	-	-	consensus_disorder	O.afer	PREDICTED: lymphocyte antigen 6A-2/6E-1-like	-	-	-
XP_023580376.1	391	T.manatus	uncharacterized protein LOC101342807 [Trichechus manatus latirostris]	-	GroEL_equatorial_domain-like~GroEL-intermediate_domain_like~GroEL_apical_domain-like	-	-	consensus_disorder~consensus_disorder~consensus_disorder~consensus_disorder~consensus_disorder	C.asiatica;L.africana;O.afer	myomegalin	-	-	-
XP_004377854.1	333	T.manatus	uncharacterized protein C16orf95 homolog [Trichechus manatus latirostris]	DUF4568	-	-	-	-	C.asiatica;E.edwardii;L.africana;O.afer	afrotheria-specific protein	-	-	-
XP_012410710.1	205	T.manatus	putative uncharacterized protein NEXN-AS1 [Trichechus manatus latirostris]	-	-	-	-	consensus_disorder~consensus_disorder~consensus_disorder~consensus_disorder	L.africana	afrotheria-specific protein	-	-	-
XP_023583507.1	360	T.manatus	uncharacterized protein LOC111819771 [Trichechus manatus latirostris]	-	alpha/beta-Hydrolases	-	-	-	L.africana	afrotheria-specific alpha/beta-Hydrolase	-	-	-
XP_007952218.1	455	O.afer	PREDICTED: uncharacterized protein LOC103208344 [Orycteropus afer afer]	HAD_2	HAD-like	-	-	consensus_disorder~consensus_disorder~consensus_disorder	C.asiatica;E.edwardii;E.telfairi;L.africana;T.manatus	PREDICTED: pseudouridine-5'-monophosphatase	GO:0016787	GO:0140096	catalytic activity, acting on a protein
XP_007934367.1	463	O.afer	PREDICTED: uncharacterized protein LOC103193076 [Orycteropus afer afer]	Cpn10~Mob1_phocein	GroES-like~Mob1/phocein	10kDa_chaperonin~10kDa_chaperonin~10kDa_chaperonin~10kDa_chaperonin	-	consensus_disorder	C.asiatica;E.edwardii;E.telfairi;L.africana;T.manatus	PREDICTED: MOB-like protein phocein	GO:0005524	GO:1901265	nucleoside phosphate binding
XP_007957013.1	678	O.afer	PREDICTED: uncharacterized protein LOC103212900 [Orycteropus afer afer]	7tm_1	Family_A_G_protein-coupled_receptor-like	Rhodopsin-like_GPCR~Rhodopsin-like_GPCR~Adrenergic_receptor~Rhodopsin-like_GPCR~Adrenergic_receptor~Rhodopsin-like_GPCR~Rhodopsin-like_GPCR~Adrenergic_receptor~Alpha-2C_adrenergic_receptor~Alpha-2C_adrenergic_receptor~Rhodopsin-like_GPCR~Alpha-2C_adrenergic_receptor~Rhodopsin-like_GPCR~Adrenergic_receptor~Alpha-2C_adrenergic_receptor	G-protein_coupled_receptors_family_1	consensus_disorder~consensus_disorder~consensus_disorder	C.asiatica;E.edwardii;E.telfairi;T.manatus	PREDICTED: alpha-2C adrenergic receptor	GO:0004930	GO:0060089	molecular transducer activity
XP_007942189.1	938	O.afer	PREDICTED: uncharacterized protein LOC103199669 [Orycteropus afer afer]	RNase_H~zf-H2C2~TLV_coat	Ribonuclease_H-like~ENV_polyprotein,_receptor-binding_domain~Virus_ectodomain	-	RNase_H_domain	-	C.asiatica;E.edwardii;E.telfairi	afrotheria-specific protein	GO:0004523	GO:0140097	catalytic activity, acting on DNA
XP_007951387.1	973	O.afer	PREDICTED: uncharacterized protein LOC103207547 [Orycteropus afer afer]	3Beta_HSD	NAD(P)-binding_Rossmann-fold_domains	-	-	consensus_disorder~consensus_disorder~consensus_disorder~consensus_disorder	C.asiatica;E.edwardii	PREDICTED: putative short-chain dehydrogenase/reductase family 42E member 2-like	GO:0003854	GO:0140098	catalytic activity, acting on RNA
XP_007957314.1	520	O.afer	PREDICTED: uncharacterized protein LOC103213290 [Orycteropus afer afer]	zf-CCHC_6~V-set~Homeobox~Homeobox	Homeodomain-like~Homeodomain-like~Immunoglobulin~Immunoglobulin	-	'Homeobox'_domain~'Homeobox'_domain~Ig-like_domain~Ig-like_domain	consensus_disorder~consensus_disorder	E.edwardii;E.telfairi	afrotheria-specific homeodomain like	GO:0003677	GO:0003676	nucleic acid binding
XP_007937913.1	433	O.afer	PREDICTED: uncharacterized protein LOC103196072 [Orycteropus afer afer]	-	-	-	-	consensus_disorder~consensus_disorder~consensus_disorder	C.asiatica	PREDICTED: serine/arginine repetitive matrix protein 2-like	-	-	-
XP_007938751.1	340	O.afer	PREDICTED: uncharacterized protein LOC103196771 [Orycteropus afer afer]	-	Snake_toxin-like	-	-	consensus_disorder~consensus_disorder~consensus_disorder	C.asiatica;E.edwardii;E.telfairi	PREDICTED: secreted Ly-6/uPAR-related protein 1	-	-	-
XP_007934958.1	379	O.afer	PREDICTED: uncharacterized protein LOC103193532 [Orycteropus afer afer]	Lipocalin	Lipocalins	Rodent_urinary_protein~Rodent_urinary_protein~Rodent_urinary_protein~Rodent_urinary_protein~Rodent_urinary_protein~Rodent_urinary_protein	-	consensus_disorder~consensus_disorder~consensus_disorder	C.asiatica;E.edwardii;E.telfairi	PREDICTED: salivary lipocalin-like	-	-	-
XP_007953359.1	388	O.afer	PREDICTED: uncharacterized protein LOC103209348 [Orycteropus afer afer]	TAFA	-	-	-	consensus_disorder~consensus_disorder	C.asiatica;E.edwardii;E.telfairi;T.manatus	PREDICTED: protein FAM19A5	-	-	-
XP_007945030.1	339	O.afer	PREDICTED: uncharacterized protein LOC103202050 [Orycteropus afer afer]	Lipocalin	Lipocalins	Von_Ebner's_gland_protein~Von_Ebner's_gland_protein~Von_Ebner's_gland_protein~Von_Ebner's_gland_protein~Von_Ebner's_gland_protein~Von_Ebner's_gland_protein	-	consensus_disorder	C.asiatica;E.edwardii;E.telfairi;L.africana;T.manatus	PREDICTED: odorant-binding protein 2b-like	-	-	-
XP_007957721.1	161	O.afer	PREDICTED: uncharacterized protein LOC103213788 [Orycteropus afer afer]	Pet191_N	-	-	-	-	C.asiatica;E.edwardii;E.telfairi;L.africana;T.manatus	PREDICTED: cytochrome c oxidase assembly factor 5	-	-	-
XP_007942544.1	627	O.afer	PREDICTED: uncharacterized protein C9orf50 homolog [Orycteropus afer afer]	DUF4685	-	-	-	consensus_disorder~consensus_disorder~consensus_disorder~consensus_disorder~consensus_disorder~consensus_disorder~consensus_disorder~consensus_disorder~consensus_disorder~consensus_disorder~consensus_disorder	C.asiatica;E.telfairi;L.africana;T.manatus	afrotheria-specific protein	-	-	-
XP_007937409.1	327	O.afer	PREDICTED: uncharacterized protein C16orf95 homolog [Orycteropus afer afer]	DUF4568	-	-	-	consensus_disorder	C.asiatica;E.edwardii;L.africana;T.manatus	afrotheria-specific protein	-	-	-
XP_007951106.1	264	O.afer	PREDICTED: uncharacterized protein C7orf73 homolog [Orycteropus afer afer]	DUF4535	-	-	-	consensus_disorder~consensus_disorder~consensus_disorder	C.asiatica;E.edwardii;E.telfairi;T.manatus	afrotheria-specific protein	-	-	-
XP_007933489.1	310	O.afer	PREDICTED: uncharacterized protein C15orf65 homolog [Orycteropus afer afer]	DUF4490	-	-	-	consensus_disorder~consensus_disorder~consensus_disorder	C.asiatica;E.telfairi;L.africana;T.manatus	afrotheria-specific protein	-	-	-
XP_007941315.1	286	O.afer	PREDICTED: uncharacterized protein C7orf50 homolog [Orycteropus afer afer]	DUF2373	-	-	-	consensus_disorder~consensus_disorder~consensus_disorder~consensus_disorder	C.asiatica;E.edwardii;E.telfairi;L.africana;T.manatus	afrotheria-specific protein	-	-	-
XP_007958086.1	342	O.afer	PREDICTED: uncharacterized protein LOC103214093 [Orycteropus afer afer]	-	-	-	-	consensus_disorder~consensus_disorder~consensus_disorder	C.asiatica	afrotheria-specific protein	-	-	-
XP_007945237.1	233	O.afer	PREDICTED: uncharacterized protein LOC103202217 [Orycteropus afer afer]	-	-	-	-	consensus_disorder~consensus_disorder	T.manatus	afrotheria-specific protein	-	-	-
XP_007956939.1	257	O.afer	PREDICTED: uncharacterized protein LOC103212811 [Orycteropus afer afer]	V-set	Immunoglobulin	-	Ig-like_domain	consensus_disorder	C.asiatica;E.edwardii;E.telfairi	afrotheria-specific Ig-like protein	-	-	-
XP_006874017.1	376	C.asiatica	PREDICTED: uncharacterized protein LOC102842441 [Chrysochloris asiatica]	NPBW	-	Neuropeptide_B/W_family~Neuropeptide_B/W_family~Neuropeptide_B/W_family	-	consensus_disorder~consensus_disorder	E.edwardii;O.afer	PREDICTED: neuropeptide W	GO:0001664	GO:0005102	signaling receptor binding
XP_006835591.1	440	C.asiatica	PREDICTED: uncharacterized protein LOC102814762 [Chrysochloris asiatica]	IL17	Cystine-knot_cytokines	-	-	consensus_disorder~consensus_disorder~consensus_disorder	E.edwardii;E.telfairi;L.africana;O.afer;T.manatus	interleukin-25	GO:0005125	GO:0030545	receptor regulator activity
XP_006869367.1	492	C.asiatica	PREDICTED: uncharacterized protein LOC102832536 [Chrysochloris asiatica]	LIF_OSM	4-helical_cytokines	-	-	consensus_disorder~consensus_disorder	E.edwardii;E.telfairi;O.afer;T.manatus	oncostatin-M	GO:0005125	GO:0030545	receptor regulator activity
XP_006876823.1	402	C.asiatica	PREDICTED: uncharacterized protein LOC102841966 [Chrysochloris asiatica]	TSLP	-	-	-	-	E.edwardii;O.afer	PREDICTED: thymic stromal lymphopoietin	GO:0005125	GO:0030545	receptor regulator activity
XP_006874971.1	396	C.asiatica	PREDICTED: uncharacterized protein LOC102841948 [Chrysochloris asiatica]	UBA_4	UBA-like	-	-	consensus_disorder~consensus_disorder~consensus_disorder~consensus_disorder~consensus_disorder	E.edwardii;E.telfairi;L.africana;O.afer;T.manatus	UBA-like domain-containing protein 1	GO:0005515	GO:0005515	protein binding
XP_006861104.1	478	C.asiatica	PREDICTED: uncharacterized protein LOC102840059 [Chrysochloris asiatica]	DED~Death	DEATH_domain	-	Death_domain~Death_effector_domain_(DED)	consensus_disorder~consensus_disorder~consensus_disorder	E.edwardii;L.africana;O.afer;T.manatus	FAS-associated death domain protein	GO:0005515	GO:0005515	protein binding
XP_006861082.1	644	C.asiatica	PREDICTED: uncharacterized protein LOC102829423 [Chrysochloris asiatica]	C2~CUE	C2_domain_(Calcium/lipid-binding_domain,_CaLB)~UBA-like	-	CUE_domain	-	E.edwardii;E.telfairi;L.africana;O.afer	toll-interacting protein	GO:0005515	GO:0005515	protein binding
XP_006871121.1	618	C.asiatica	PREDICTED: uncharacterized protein LOC102835003 [Chrysochloris asiatica]	TEX13~TLE_N	-	-	-	consensus_disorder~consensus_disorder	E.edwardii;L.africana;O.afer	testis-expressed protein 13A	GO:0005515	GO:0005515	protein binding
XP_006831535.1	531	C.asiatica	PREDICTED: uncharacterized protein LOC102829089 [Chrysochloris asiatica]	Homeobox	Homeodomain-like	-	'Homeobox'_domain	consensus_disorder~consensus_disorder	E.telfairi;L.africana;O.afer;T.manatus	T-cell leukemia homeobox protein 1	GO:0003677	GO:0003676	nucleic acid binding
XP_006862183.1	210	C.asiatica	PREDICTED: uncharacterized protein LOC102821270 [Chrysochloris asiatica]	RNase_P_Rpp14	Rnp2-like	-	-	-	E.edwardii;E.telfairi;O.afer;T.manatus	ribonuclease P protein subunit p14	GO:0004540	GO:0004518	nuclease activity
XP_006835722.1	356	C.asiatica	PREDICTED: uncharacterized protein LOC102833965 [Chrysochloris asiatica]	Ferritin	Ferritin-like	-	Ferritin-like_diiron_domain	consensus_disorder	E.edwardii;E.telfairi;L.africana;O.afer;T.manatus	ferritin light chain	GO:0008199	GO:0005506	iron ion binding
XP_006874029.1	724	C.asiatica	PREDICTED: uncharacterized protein LOC102814540 [Chrysochloris asiatica]	Trypsin	Trypsin-like_serine_proteases	Chymotrypsin_serine_protease_family_(S1)~Chymotrypsin_serine_protease_family_(S1)~Chymotrypsin_serine_protease_family_(S1)	Serine_proteases_trypsin_domain	consensus_disorder~consensus_disorder~consensus_disorder	E.telfairi;L.africana;O.afer	serine protease 27	GO:0004252	GO:0008238	exopeptidase activity
XP_006867548.1	760	C.asiatica	PREDICTED: uncharacterized protein LOC102827797 [Chrysochloris asiatica]	Homeobox	Homeodomain-like	-	'Homeobox'_domain	consensus_disorder~consensus_disorder~consensus_disorder~consensus_disorder~consensus_disorder~consensus_disorder~consensus_disorder	L.africana;O.afer;T.manatus	homeobox protein VENTX	GO:0043565	GO:0003677	DNA binding
XP_006863853.1	762	C.asiatica	PREDICTED: uncharacterized protein LOC102825360 [Chrysochloris asiatica]	Glyco_tran_10_N~Glyco_transf_10	UDP-Glycosyltransferase/glycogen_phosphorylase	-	-	consensus_disorder~consensus_disorder~consensus_disorder	E.edwardii;E.telfairi;L.africana;O.afer;T.manatus	alpha-(1,3)-fucosyltransferase 7	GO:0008417	GO:0140096	catalytic activity, acting on a protein
XP_006867300.1	412	C.asiatica	PREDICTED: uncharacterized protein LOC102822467 [Chrysochloris asiatica]	Phospholip_A2_1	Phospholipase_A2,_PLA2	Phospholipase_A2~Phospholipase_A2~Phospholipase_A2~Phospholipase_A2~Phospholipase_A2	-	consensus_disorder	E.edwardii;E.telfairi;L.africana;O.afer;T.manatus	group 10 secretory phospholipase A2	GO:0004623	GO:0140096	catalytic activity, acting on a protein
XP_006871256.1	737	C.asiatica	PREDICTED: uncharacterized protein LOC102842033 [Chrysochloris asiatica]	Kinesin	P-loop_containing_nucleoside_triphosphate_hydrolases	Kinesin_heavy_chain~Kinesin_heavy_chain~Kinesin_heavy_chain	Kinesin_motor_domain	consensus_disorder	E.edwardii;E.telfairi	PREDICTED: kinesin-like protein KIF25	GO:0003777	GO:0140096	catalytic activity, acting on a protein
XP_006863835.1	465	C.asiatica	PREDICTED: uncharacterized protein LOC102818126 [Chrysochloris asiatica]	HNH_3~zf-MYND	His-Me_finger_endonucleases~HIT/MYND_zinc_finger-like	-	Zinc_finger_MYND-type	consensus_disorder~consensus_disorder	E.edwardii;E.telfairi;L.africana;O.afer;T.manatus	zinc finger MYND domain-containing protein 19	-	-	-
XP_006867676.1	256	C.asiatica	PREDICTED: uncharacterized protein LOC102817783 [Chrysochloris asiatica]	LSM	Sm-like_ribonucleoproteins	-	-	consensus_disorder	E.edwardii;E.telfairi;L.africana;O.afer;T.manatus	U7 snRNA-associated Sm-like protein LSm10	-	-	-
XP_006861086.1	455	C.asiatica	PREDICTED: uncharacterized protein LOC102832095 [Chrysochloris asiatica]	Troponin	Troponin_coil-coiled_subunits	-	-	consensus_disorder~consensus_disorder~consensus_disorder~consensus_disorder~consensus_disorder~consensus_disorder	E.edwardii;E.telfairi;O.afer;T.manatus	troponin I, fast skeletal muscle	-	-	-
XP_006871956.1	209	C.asiatica	PREDICTED: uncharacterized protein LOC102832424 [Chrysochloris asiatica]	-	-	-	-	consensus_disorder~consensus_disorder	E.edwardii;E.telfairi;L.africana;O.afer;T.manatus	transmembrane protein 207	-	-	-
XP_006832312.1	245	C.asiatica	PREDICTED: uncharacterized protein LOC102842154 [Chrysochloris asiatica]	SNURF	-	-	-	-	O.afer;T.manatus	SNRPN upstream reading frame protein	-	-	-
XP_006863845.1	331	C.asiatica	PREDICTED: uncharacterized protein LOC102821936 [Chrysochloris asiatica]	zf-RING_UBOX	RING/U-box	-	Zinc_finger_RING-type	consensus_disorder	E.edwardii;E.telfairi;O.afer;T.manatus	RING finger protein 224	-	-	-
XP_006874195.1	616	C.asiatica	PREDICTED: uncharacterized protein LOC102830805 [Chrysochloris asiatica]	zf-RING_5	-	-	Zinc_finger_RING-type	-	E.edwardii;E.telfairi;L.africana;O.afer;T.manatus	probable E3 SUMO-protein ligase RNF212	-	-	-
XP_006839657.1	537	C.asiatica	PREDICTED: uncharacterized protein LOC102823040 [Chrysochloris asiatica]	-	-	-	-	consensus_disorder~consensus_disorder~consensus_disorder~consensus_disorder~consensus_disorder~consensus_disorder~consensus_disorder	E.edwardii;E.telfairi;O.afer	PREDICTED: testis-expressed sequence 22 protein	-	-	-
XP_006830916.1	274	C.asiatica	PREDICTED: uncharacterized protein LOC102816768 [Chrysochloris asiatica]	-	Snake_toxin-like	-	-	consensus_disorder~consensus_disorder~consensus_disorder	E.edwardii;E.telfairi;O.afer	PREDICTED: secreted Ly-6/uPAR-related protein 1	-	-	-
XP_006868643.1	325	C.asiatica	PREDICTED: uncharacterized protein LOC102811403 [Chrysochloris asiatica]	-	-	-	-	-	E.edwardii	PREDICTED: heat shock transcription factor, Y-linked-like	-	-	-
XP_006864378.1	320	C.asiatica	PREDICTED: uncharacterized protein LOC102814976 [Chrysochloris asiatica]	MOZART1	-	-	-	consensus_disorder~consensus_disorder~consensus_disorder	E.edwardii;E.telfairi;O.afer;T.manatus	mitotic-spindle organizing protein 1	-	-	-
XP_006874475.1	352	C.asiatica	PREDICTED: uncharacterized protein LOC102829790 [Chrysochloris asiatica]	Tom7	-	-	-	consensus_disorder~consensus_disorder~consensus_disorder	L.africana;T.manatus	mitochondrial import receptor subunit TOM7 homolog	-	-	-
XP_006868353.1	478	C.asiatica	PREDICTED: uncharacterized protein LOC102817025 [Chrysochloris asiatica]	IL11	4-helical_cytokines	Mammalian_interleukin-11~Interleukin-11~Mammalian_interleukin-11~Interleukin-11~Mammalian_interleukin-11~Interleukin-11	-	consensus_disorder~consensus_disorder~consensus_disorder~consensus_disorder~consensus_disorder~consensus_disorder	E.edwardii;E.telfairi;L.africana;O.afer;T.manatus	interleukin-11	-	-	-
XP_006837636.1	268	C.asiatica	PREDICTED: uncharacterized protein LOC102829522 [Chrysochloris asiatica]	Bombesin	-	-	-	consensus_disorder~consensus_disorder~consensus_disorder~consensus_disorder	E.telfairi;L.africana;O.afer;T.manatus	gastrin-releasing peptide	-	-	-
XP_006876919.1	498	C.asiatica	PREDICTED: uncharacterized protein LOC102825213 [Chrysochloris asiatica]	-	-	-	-	consensus_disorder~consensus_disorder~consensus_disorder~consensus_disorder~consensus_disorder	E.edwardii;L.africana;O.afer	factor VIII intron 22 protein	-	-	-
XP_006863551.1	383	C.asiatica	PREDICTED: uncharacterized protein LOC102817510 [Chrysochloris asiatica]	-	-	-	-	consensus_disorder~consensus_disorder~consensus_disorder~consensus_disorder~consensus_disorder~consensus_disorder	E.edwardii;E.telfairi;L.africana;O.afer;T.manatus	C-X-C motif chemokine 16	-	-	-
XP_006875538.1	618	C.asiatica	PREDICTED: uncharacterized protein LOC102825461 [Chrysochloris asiatica]	Lectin_C~Gag_p30	C-type_lectin-like	-	C-type_lectin_domain	consensus_disorder~consensus_disorder~consensus_disorder	E.edwardii;E.telfairi;L.africana;O.afer	C-type lectin domain family 12 member A	-	-	-
XP_006862845.1	410	C.asiatica	PREDICTED: uncharacterized protein LOC102827510 [Chrysochloris asiatica]	BID	Bcl-2_inhibitors_of_programmed_cell_death	-	-	consensus_disorder~consensus_disorder	E.edwardii;E.telfairi;L.africana;O.afer;T.manatus	BH3-interacting domain death agonist	-	-	-
XP_006830923.1	273	C.asiatica	PREDICTED: uncharacterized protein LOC102819784 [Chrysochloris asiatica]	UPAR_LY6	Snake_toxin-like~Snake_toxin-like~Snake_toxin-like	-	-	-	E.edwardii;L.africana;O.afer;T.manatus	afrotheria-specific protein	-	-	-
XP_006871377.1	412	C.asiatica	PREDICTED: uncharacterized protein LOC102831410 [Chrysochloris asiatica]	Gag_p24	Retrovirus_capsid_protein,_N-terminal_core_domain	-	-	consensus_disorder	E.edwardii;L.africana	afrotheria-specific protein	-	-	-
XP_006863067.1	189	C.asiatica	PREDICTED: uncharacterized protein C2orf74 homolog [Chrysochloris asiatica]	DUF4642	-	-	-	consensus_disorder~consensus_disorder~consensus_disorder	L.africana;O.afer;T.manatus	afrotheria-specific protein	-	-	-
XP_006869783.1	165	C.asiatica	PREDICTED: uncharacterized protein C14orf142 homolog [Chrysochloris asiatica]	DUF4611	-	-	-	consensus_disorder~consensus_disorder~consensus_disorder	E.edwardii;E.telfairi;L.africana;O.afer;T.manatus	afrotheria-specific protein	-	-	-
XP_006860341.1	527	C.asiatica	PREDICTED: uncharacterized protein LOC102829684 [Chrysochloris asiatica]	DUF4568	-	-	-	consensus_disorder~consensus_disorder	E.edwardii;L.africana;O.afer;T.manatus	afrotheria-specific protein	-	-	-
XP_006839661.1	736	C.asiatica	PREDICTED: uncharacterized protein LOC102824928 [Chrysochloris asiatica]	Clathrin_bdg	-	-	-	consensus_disorder~consensus_disorder~consensus_disorder~consensus_disorder~consensus_disorder	L.africana;O.afer;T.manatus	afrotheria-specific protein	-	-	-
XP_006869369.1	300	C.asiatica	PREDICTED: uncharacterized protein C5orf52 homolog [Chrysochloris asiatica]	-	-	-	-	consensus_disorder	E.edwardii;E.telfairi;L.africana;O.afer;T.manatus	afrotheria-specific protein	-	-	-
XP_006861152.1	445	C.asiatica	PREDICTED: uncharacterized protein LOC102828133 [Chrysochloris asiatica]	-	-	-	-	consensus_disorder~consensus_disorder~consensus_disorder~consensus_disorder	E.edwardii;E.telfairi;L.africana;O.afer;T.manatus	afrotheria-specific protein	-	-	-
XP_006859311.1	720	C.asiatica	PREDICTED: uncharacterized protein LOC102812749 [Chrysochloris asiatica]	-	-	-	-	-	E.edwardii;E.telfairi;L.africana;T.manatus	afrotheria-specific protein	-	-	-
XP_006834003.1	210	C.asiatica	PREDICTED: uncharacterized protein LOC102827569 [Chrysochloris asiatica]	-	-	-	-	consensus_disorder~consensus_disorder~consensus_disorder	E.telfairi;L.africana;O.afer;T.manatus	afrotheria-specific protein	-	-	-
XP_006871349.1	202	C.asiatica	PREDICTED: uncharacterized protein C1orf100 homolog [Chrysochloris asiatica]	-	-	-	-	-	E.edwardii;E.telfairi;O.afer	afrotheria-specific protein	-	-	-
XP_006863867.1	325	C.asiatica	PREDICTED: uncharacterized protein LOC102831863 [Chrysochloris asiatica]	Lipocalin	Lipocalins	-	-	consensus_disorder~consensus_disorder~consensus_disorder	E.edwardii;O.afer	afrotheria-specific Lipocalin containing protein	-	-	-
XP_006875288.1	489	C.asiatica	PREDICTED: uncharacterized protein LOC102834533 [Chrysochloris asiatica]	IBR	RING/U-box~RING/U-box	-	Prokaryotic_membrane_lipoprotein_lipid_attachment_site~TRIAD_supradomain	consensus_disorder~consensus_disorder	E.edwardii;L.africana;O.afer;T.manatus	afrotheria-specific E3 ubiquitin-protein ligase ARIH2-like	-	-	-
XP_006894244.1	266	E.edwardii	PREDICTED: uncharacterized protein LOC102862726 [Elephantulus edwardii]	Ribosomal_L36e	-	-	-	consensus_disorder~consensus_disorder	C.asiatica;E.telfairi	PREDICTED: 60S ribosomal protein L36-like	GO:0003735	GO:0005198	structural molecule activity
XP_006894939.1	480	E.edwardii	PREDICTED: uncharacterized protein LOC102860955 [Elephantulus edwardii]	LIF_OSM	4-helical_cytokines	-	-	consensus_disorder~consensus_disorder~consensus_disorder~consensus_disorder~consensus_disorder	C.asiatica;E.telfairi;O.afer;T.manatus	oncostatin-M	GO:0005125	GO:0030545	receptor regulator activity
XP_006899412.1	412	E.edwardii	PREDICTED: uncharacterized protein LOC102870763 [Elephantulus edwardii]	ubiquitin	Ubiquitin-like	-	Ubiquitin_domain	consensus_disorder	C.asiatica;L.africana;O.afer;T.manatus	ubiquitin-like protein 4B	GO:0005515	GO:0005515	protein binding
XP_006896480.1	405	E.edwardii	PREDICTED: uncharacterized protein LOC102846317 [Elephantulus edwardii]	TNF	TNF-like	-	TNF_family	consensus_disorder~consensus_disorder	C.asiatica;E.telfairi;L.africana;O.afer	tumor necrosis factor ligand superfamily member 9	GO:0005515	GO:0005515	protein binding
XP_006887303.1	559	E.edwardii	PREDICTED: uncharacterized protein LOC102865261 [Elephantulus edwardii]	V-set~V-set~V-set~GST_N	Immunoglobulin~Immunoglobulin~Thioredoxin-like~Immunoglobulin	-	Ig-like_domain~Ig-like_domain	consensus_disorder	C.asiatica;E.telfairi;L.africana;T.manatus	afrotheria-specific Ig-like protein	GO:0005515	GO:0005515	protein binding
XP_006882268.1	918	E.edwardii	PREDICTED: uncharacterized protein LOC102874917 [Elephantulus edwardii]	V-set~V-set~PRY~SPRY	Immunoglobulin~Immunoglobulin~Immunoglobulin~Immunoglobulin~Concanavalin_A-like_lectins/glucanases	Butyrophylin_C-terminal_DUF~Butyrophylin_C-terminal_DUF~Butyrophylin_C-terminal_DUF~Butyrophylin_C-terminal_DUF~Butyrophylin_C-terminal_DUF~Butyrophylin_C-terminal_DUF	Ig-like_domain~Ig-like_domain~Ig-like_domain~Ig-like_domain~B30.2/SPRY_domain	consensus_disorder~consensus_disorder~consensus_disorder	C.asiatica;E.telfairi;L.africana;O.afer	butyrophilin-like protein 2	GO:0005515	GO:0005515	protein binding
XP_006902478.1	860	E.edwardii	PREDICTED: uncharacterized protein LOC102873632 [Elephantulus edwardii]	IL6Ra-bind	Fibronectin_type_III~Fibronectin_type_III	-	-	consensus_disorder~consensus_disorder~consensus_disorder~consensus_disorder~consensus_disorder~consensus_disorder~consensus_disorder	C.asiatica;L.africana;T.manatus	interleukin-3 receptor subunit alpha	GO:0005515	GO:0005515	protein binding
XP_006893419.1	601	E.edwardii	PREDICTED: uncharacterized protein LOC102857967 [Elephantulus edwardii]	C2~CUE	C2_domain_(Calcium/lipid-binding_domain,_CaLB)~UBA-like	-	CUE_domain	consensus_disorder	C.asiatica;E.telfairi;L.africana;O.afer	toll-interacting protein	GO:0005515	GO:0005515	protein binding
XP_006880460.1	468	E.edwardii	PREDICTED: uncharacterized protein LOC102868837 [Elephantulus edwardii]	Ank_2~Ank_5	Ankyrin_repeat	-	Ankyrin_repeat~Ankyrin_repeat~Ankyrin_repeat_region_circular	consensus_disorder~consensus_disorder	C.asiatica;E.telfairi;L.africana;O.afer;T.manatus	ankyrin repeat domain-containing protein 22	GO:0005515	GO:0005515	protein binding
XP_006894096.1	740	E.edwardii	PREDICTED: uncharacterized protein LOC102848843 [Elephantulus edwardii]	wnt	-	Wnt-14_protein~Wnt-14_protein~Wnt_protein~Wnt_protein~Wnt_protein~Wnt_protein~Wnt-14_protein~Wnt_protein~Wnt-14_protein	-	consensus_disorder~consensus_disorder~consensus_disorder~consensus_disorder	C.asiatica;E.telfairi;L.africana;O.afer;T.manatus	protein Wnt-9a	GO:0005102	GO:0005515	protein binding
XP_006889847.1	1852	E.edwardii	PREDICTED: uncharacterized protein LOC102876209 [Elephantulus edwardii]	Pkinase_Tyr~PDZ~LIM~LIM	Glucocorticoid_receptor-like_(DNA-binding_domain)~Glucocorticoid_receptor-like_(DNA-binding_domain)~Glucocorticoid_receptor-like_(DNA-binding_domain)~PDZ_domain-like~Protein_kinase-like_(PK-like)	Tyrosine_kinase_catalytic_domain~Tyrosine_kinase_catalytic_domain~Tyrosine_kinase_catalytic_domain	LIM_domain~LIM_domain~PDZ_domain~Protein_kinase_domain	consensus_disorder~consensus_disorder~consensus_disorder	C.asiatica;E.telfairi;O.afer;T.manatus	LIM domain kinase 1	GO:0005524	GO:1901265	nucleoside phosphate binding
XP_006902111.1	497	E.edwardii	PREDICTED: uncharacterized protein LOC102863233 [Elephantulus edwardii]	Ribosomal_L37e~RRM_1~hNIFK_binding	Zn-binding_ribosomal_proteins~RNA-binding_domain,_RBD	-	Eukaryotic_RNA_Recognition_Motif_(RRM)	consensus_disorder~consensus_disorder~consensus_disorder	L.africana;O.afer;T.manatus	MKI67 FHA domain-interacting nucleolar phosphoprotein	GO:0003676	GO:0003676	nucleic acid binding
XP_006899696.1	367	E.edwardii	PREDICTED: uncharacterized protein LOC102873338 [Elephantulus edwardii]	RRM_1	RNA-binding_domain,_RBD	-	Eukaryotic_RNA_Recognition_Motif_(RRM)	consensus_disorder~consensus_disorder	C.asiatica;E.telfairi;L.africana;O.afer;T.manatus	RNA-binding protein with multiple splicing 2	GO:0003676	GO:0003676	nucleic acid binding
XP_006885293.1	375	E.edwardii	PREDICTED: uncharacterized protein LOC102852065 [Elephantulus edwardii]	RNase_T	Ribonuclease_H-like	-	-	consensus_disorder~consensus_disorder~consensus_disorder	E.telfairi;O.afer;T.manatus	interferon-stimulated gene 20 kDa protein	GO:0003676	GO:0003676	nucleic acid binding
XP_006903100.1	1746	E.edwardii	PREDICTED: uncharacterized protein LOC102858497 [Elephantulus edwardii]	zf-C2H2~zf-C2H2~KRAB~KRAB~SCAN~SCAN	KRAB_domain_(Kruppel-associated_box)~beta-beta-alpha_zinc_fingers~beta-beta-alpha_zinc_fingers~beta-beta-alpha_zinc_fingers~beta-beta-alpha_zinc_fingers~beta-beta-alpha_zinc_fingers~Retrovirus_capsid_dimerization_domain-like~Retrovirus_capsid_dimerization_domain-like~KRAB_domain_(Kruppel-associated_box)~beta-beta-alpha_zinc_fingers~beta-beta-alpha_zinc_fingers	-	Krueppel-associated_box_(KRAB)~Krueppel-associated_box_(KRAB)~SCAN_box~SCAN_box~Zinc_finger_C2H2_type_domain~Zinc_finger_C2H2_type_domain~Zinc_finger_C2H2_type_domain~Zinc_finger_C2H2_type_domain~Zinc_finger_C2H2_type_domain~Zinc_finger_C2H2_type_domain~Zinc_finger_C2H2_type_domain~Zinc_finger_C2H2_type_domain~Zinc_finger_C2H2_type_domain~Zinc_finger_C2H2_type_domain~Zinc_finger_C2H2_type_domain~…	consensus_disorder~consensus_disorder~consensus_disorder~consensus_disorder~consensus_disorder~consensus_disorder~consensus_disorder~consensus_disorder~consensus_disorder~consensus_disorder~consensus_disorder~consensus_disorder~consensus_disorder~consensus_disorder~consensus_disorder	C.asiatica;E.telfairi;O.afer;T.manatus	zinc finger protein 324A	GO:0003676	GO:0003676	nucleic acid binding
XP_006903097.1	1939	E.edwardii	PREDICTED: uncharacterized protein LOC102857278 [Elephantulus edwardii]	zf-C2H2~zf-C2H2~zf-C2H2~zf-C2H2~zf-C2H2~KRAB~SCAN	KRAB_domain_(Kruppel-associated_box)~beta-beta-alpha_zinc_fingers~beta-beta-alpha_zinc_fingers~beta-beta-alpha_zinc_fingers~beta-beta-alpha_zinc_fingers~beta-beta-alpha_zinc_fingers~Retrovirus_capsid_dimerization_domain-like~beta-beta-alpha_zinc_fingers~beta-beta-alpha_zinc_fingers~beta-beta-alpha_zinc_fingers~beta-beta-alpha_zinc_fingers	-	Krueppel-associated_box_(KRAB)~Zinc_finger_C2H2_type_domain~Zinc_finger_C2H2_type_domain~Zinc_finger_C2H2_type_domain~Zinc_finger_C2H2_type_domain~Zinc_finger_C2H2_type_domain~Zinc_finger_C2H2_type_domain~Zinc_finger_C2H2_type_domain~SCAN_box~Zinc_finger_C2H2_type_domain~Zinc_finger_C2H2_type_domain~Zinc_finger_C2H2_type_domain~Zinc_finger_C2H2_type_domain~Zinc_finger_C2H2_type_domain~Zinc_finger…	consensus_disorder~consensus_disorder~consensus_disorder~consensus_disorder~consensus_disorder~consensus_disorder~consensus_disorder~consensus_disorder~consensus_disorder	C.asiatica;L.africana;O.afer;T.manatus	zinc finger and SCAN domain-containing protein 22	GO:0003676	GO:0003676	nucleic acid binding
XP_006902564.1	715	E.edwardii	PREDICTED: uncharacterized protein LOC102862420 [Elephantulus edwardii]	7tm_4	Family_A_G_protein-coupled_receptor-like~Family_A_G_protein-coupled_receptor-like	Olfactory_receptor~Olfactory_receptor~Olfactory_receptor~Olfactory_receptor~Olfactory_receptor	G-protein_coupled_receptors_family_1~G-protein_coupled_receptors_family_1	consensus_disorder~consensus_disorder~consensus_disorder	E.telfairi;L.africana;O.afer	PREDICTED: olfactory receptor 11A1-like	GO:0004930	GO:0060089	molecular transducer activity
XP_006900058.1	576	E.edwardii	PREDICTED: uncharacterized protein LOC102852469 [Elephantulus edwardii]	7tm_4~Pcc1	Family_A_G_protein-coupled_receptor-like	Olfactory_receptor~Olfactory_receptor~Olfactory_receptor	G-protein_coupled_receptors_family_1	consensus_disorder	C.asiatica;E.telfairi;L.africana;T.manatus	olfactory receptor 13H1-like	GO:0004930	GO:0060089	molecular transducer activity
XP_006889789.1	848	E.edwardii	PREDICTED: uncharacterized protein LOC102850173 [Elephantulus edwardii]	7tm_1	Family_A_G_protein-coupled_receptor-like	-	G-protein_coupled_receptors_family_1	consensus_disorder~consensus_disorder	C.asiatica;E.telfairi;L.africana;O.afer;T.manatus	G-protein coupled estrogen receptor 1	GO:0004930	GO:0060089	molecular transducer activity
XP_006898069.1	1036	E.edwardii	PREDICTED: uncharacterized protein LOC102853130 [Elephantulus edwardii]	Pkinase	Protein_kinase-like_(PK-like)	-	Protein_kinase_domain	consensus_disorder~consensus_disorder~consensus_disorder~consensus_disorder~consensus_disorder~consensus_disorder~consensus_disorder	C.asiatica;E.telfairi;L.africana;O.afer;T.manatus	serine/threonine-protein kinase STK11	GO:0030295	GO:0019207	kinase regulator activity
XP_006893707.1	1295	E.edwardii	PREDICTED: uncharacterized protein LOC102869771 [Elephantulus edwardii]	Glyco_hydro_39	(Trans)glycosidases~Glycosyl_hydrolase_domain~Fibronectin_type_III	Glycosyl_hydrolase_family_39~Glycosyl_hydrolase_family_39~Glycosyl_hydrolase_family_39~Glycosyl_hydrolase_family_39~Glycosyl_hydrolase_family_39~Glycosyl_hydrolase_family_39~Glycosyl_hydrolase_family_39	-	consensus_disorder~consensus_disorder~consensus_disorder~consensus_disorder~consensus_disorder~consensus_disorder	O.afer;T.manatus	alpha-L-iduronidase	GO:0004553	GO:0016787	hydrolase activity
XP_006901020.1	841	E.edwardii	PREDICTED: uncharacterized protein LOC102855600 [Elephantulus edwardii]	Ets	Winged_helix_DNA-binding_domain	ETS_domain~ETS_domain~ETS_domain~ETS_domain	Ets-domain	consensus_disorder~consensus_disorder~consensus_disorder~consensus_disorder~consensus_disorder~consensus_disorder~consensus_disorder~consensus_disorder	C.asiatica;E.telfairi;O.afer;T.manatus	ETS translocation variant 3-like protein	GO:0043565	GO:0003677	DNA binding
XP_006893582.1	532	E.edwardii	PREDICTED: uncharacterized protein LOC102870989 [Elephantulus edwardii]	Homeobox	Homeodomain-like	Homeobox~Homeobox~Homeobox	'Homeobox'_domain	consensus_disorder~consensus_disorder~consensus_disorder~consensus_disorder~consensus_disorder	C.asiatica;E.telfairi;L.africana;O.afer;T.manatus	homeobox protein GBX-2	GO:0043565	GO:0003677	DNA binding
XP_006887336.1	660	E.edwardii	PREDICTED: uncharacterized protein LOC102850012 [Elephantulus edwardii]	TPK_catalytic~TPK_B1_binding	Thiamin_pyrophosphokinase,_catalytic_domain~Thiamin_pyrophosphokinase,_substrate-binding_domain	-	-	consensus_disorder~consensus_disorder~consensus_disorder~consensus_disorder~consensus_disorder~consensus_disorder	C.asiatica;E.telfairi;L.africana;T.manatus	thiamin pyrophosphokinase 1	GO:0004788	GO:0140096	catalytic activity, acting on a protein
XP_006902761.1	446	E.edwardii	PREDICTED: uncharacterized protein LOC102869178 [Elephantulus edwardii]	-	Nudix	-	Nudix_hydrolase_domain	consensus_disorder~consensus_disorder~consensus_disorder~consensus_disorder	C.asiatica;E.telfairi;L.africana;O.afer;T.manatus	uridine diphosphate glucose pyrophosphatase	GO:0016787	GO:0140096	catalytic activity, acting on a protein
XP_006882897.1	916	E.edwardii	PREDICTED: uncharacterized protein LOC102868726 [Elephantulus edwardii]	Kinesin~Ribosomal_L7Ae~Microtub_bd	L30e-like~P-loop_containing_nucleoside_triphosphate_hydrolases~P-loop_containing_nucleoside_triphosphate_hydrolases	Kinesin_heavy_chain~Kinesin_heavy_chain~Kinesin_heavy_chain	Kinesin_motor_domain	consensus_disorder~consensus_disorder~consensus_disorder~consensus_disorder	C.asiatica;E.telfairi	kinesin-like protein KIF25	GO:0003777	GO:0140096	catalytic activity, acting on a protein
XP_006893557.1	457	E.edwardii	PREDICTED: uncharacterized protein LOC102855121 [Elephantulus edwardii]	UCH	Cysteine_proteinases~RING/U-box~RING/U-box	-	Ubiquitin_specific_protease_(USP)_domain~TRIAD_supradomain	-	C.asiatica;L.africana;O.afer;T.manatus	afrotheria-specific E3 ubiquitin-protein ligase ARIH2-like	GO:0036459	GO:0140096	catalytic activity, acting on a protein
XP_006893561.1	409	E.edwardii	PREDICTED: uncharacterized protein LOC102858378 [Elephantulus edwardii]	DSPc	(Phosphotyrosine_protein)_phosphatases_II	-	Dual_specificity_protein_phosphatase_family~Tyrosine_specific_protein_phosphatases_family	consensus_disorder	C.asiatica;O.afer;T.manatus	dual specificity phosphatase 28	GO:0016791	GO:0140096	catalytic activity, acting on a protein
XP_006896674.1	798	E.edwardii	PREDICTED: uncharacterized protein LOC102860029 [Elephantulus edwardii]	QRPTase_N~QRPTase_C	Nicotinate/Quinolinate_PRTase_N-terminal_domain-like~Nicotinate/Quinolinate_PRTase_C-terminal_domain-like	-	-	consensus_disorder~consensus_disorder~consensus_disorder~consensus_disorder~consensus_disorder~consensus_disorder	C.asiatica;E.telfairi;L.africana;O.afer;T.manatus	nicotinate-nucleotide pyrophosphorylase [carboxylating]	GO:0003824	GO:0003824	catalytic activity
XP_006894972.1	693	E.edwardii	PREDICTED: uncharacterized protein LOC102847768 [Elephantulus edwardii]	Pur_DNA_glyco	FMT_C-terminal_domain-like	-	-	consensus_disorder~consensus_disorder~consensus_disorder	C.asiatica;E.telfairi;L.africana;O.afer;T.manatus	DNA-3-methyladenine glycosylase	GO:0003824	GO:0003824	catalytic activity
XP_006887285.1	1460	E.edwardii	PREDICTED: uncharacterized protein LOC102855481 [Elephantulus edwardii]	p450	Cytochrome_P450	E-class_P450_group_I~E-class_P450_group_I~E-class_P450_group_I~E-class_P450_group_I~E-class_P450_group_I~E-class_P450_group_I~E-class_P450_group_I	-	consensus_disorder~consensus_disorder~consensus_disorder~consensus_disorder~consensus_disorder~consensus_disorder~consensus_disorder~consensus_disorder	C.asiatica;E.telfairi;L.africana;O.afer;T.manatus	thromboxane-A synthase	GO:0016705	GO:0003824	catalytic activity
XP_006890559.1	274	E.edwardii	PREDICTED: uncharacterized protein LOC102860525 [Elephantulus edwardii]	CD225	-	-	-	consensus_disorder~consensus_disorder~consensus_disorder~consensus_disorder~consensus_disorder	C.asiatica;O.afer;T.manatus	transmembrane protein 233	-	-	-
XP_006897136.1	233	E.edwardii	PREDICTED: uncharacterized protein LOC102874776 [Elephantulus edwardii]	-	-	-	-	consensus_disorder	C.asiatica;E.telfairi;L.africana;O.afer;T.manatus	transmembrane protein 207	-	-	-
XP_006886413.1	507	E.edwardii	PREDICTED: uncharacterized protein LOC102874695 [Elephantulus edwardii]	-	-	-	-	consensus_disorder	C.asiatica;E.telfairi;L.africana;O.afer;T.manatus	transmembrane channel-like protein 8	-	-	-
XP_006886369.1	926	E.edwardii	PREDICTED: uncharacterized protein LOC102854789 [Elephantulus edwardii]	V-set	Immunoglobulin	-	Ig-like_domain	consensus_disorder~consensus_disorder~consensus_disorder~consensus_disorder~consensus_disorder	C.asiatica;E.telfairi;L.africana;O.afer;T.manatus	T-cell antigen CD7	-	-	-
XP_006890945.1	459	E.edwardii	PREDICTED: uncharacterized protein LOC102856887 [Elephantulus edwardii]	V-set	Immunoglobulin	-	Ig-like_domain	consensus_disorder~consensus_disorder~consensus_disorder~consensus_disorder	C.asiatica;E.telfairi;L.africana;O.afer;T.manatus	sodium channel subunit beta-4	-	-	-
XP_006898026.1	288	E.edwardii	PREDICTED: uncharacterized protein LOC102866282 [Elephantulus edwardii]	MAP17	-	-	-	consensus_disorder~consensus_disorder~consensus_disorder~consensus_disorder	C.asiatica;E.telfairi;O.afer;T.manatus	small integral membrane protein 24	-	-	-
XP_006895600.1	576	E.edwardii	PREDICTED: uncharacterized protein LOC102843045 [Elephantulus edwardii]	V-set	Immunoglobulin~Immunoglobulin	-	Ig-like_domain	consensus_disorder~consensus_disorder	C.asiatica;E.telfairi;L.africana;O.afer;T.manatus	SLAM family member 7	-	-	-
XP_006900734.1	460	E.edwardii	PREDICTED: uncharacterized protein LOC102863476 [Elephantulus edwardii]	HNH_3~zf-MYND	His-Me_finger_endonucleases~HIT/MYND_zinc_finger-like	-	Zinc_finger_MYND-type	consensus_disorder	C.asiatica;E.telfairi;L.africana;O.afer;T.manatus	PREDICTED: zinc finger MYND domain-containing protein 19	-	-	-
XP_006900452.1	246	E.edwardii	PREDICTED: uncharacterized protein LOC102868900 [Elephantulus edwardii]	Synaptobrevin	SNARE_fusion_complex	Synaptobrevin~Synaptobrevin~Synaptobrevin	v-SNARE_coiled-coil_homology_domain	consensus_disorder~consensus_disorder	C.asiatica;E.telfairi;L.africana;O.afer;T.manatus	PREDICTED: vesicle-associated membrane protein 5	-	-	-
XP_006899242.1	304	E.edwardii	PREDICTED: uncharacterized protein LOC102858437 [Elephantulus edwardii]	Synaptobrevin	SNARE_fusion_complex	Synaptobrevin~Synaptobrevin~Synaptobrevin	v-SNARE_coiled-coil_homology_domain	consensus_disorder~consensus_disorder	C.asiatica;E.telfairi;L.africana;O.afer;T.manatus	PREDICTED: vesicle-associated membrane protein 2	-	-	-
XP_006881956.1	455	E.edwardii	PREDICTED: uncharacterized protein LOC102867629 [Elephantulus edwardii]	Vg_Tdu	-	-	-	consensus_disorder~consensus_disorder~consensus_disorder~consensus_disorder	C.asiatica;E.telfairi;L.africana;O.afer	PREDICTED: transcription cofactor vestigial-like protein 1	-	-	-
XP_006886357.1	324	E.edwardii	PREDICTED: uncharacterized protein LOC102847032 [Elephantulus edwardii]	FAM195	-	-	-	consensus_disorder~consensus_disorder~consensus_disorder~consensus_disorder~consensus_disorder~consensus_disorder	C.asiatica;E.telfairi;L.africana;O.afer;T.manatus	PREDICTED: protein FAM195B	-	-	-
XP_006882857.1	741	E.edwardii	PREDICTED: uncharacterized protein LOC102844288 [Elephantulus edwardii]	MHC_I	MHC_antigen-recognition_domain~MHC_antigen-recognition_domain	-	-	consensus_disorder~consensus_disorder~consensus_disorder	C.asiatica;L.africana;O.afer;T.manatus	PREDICTED: NKG2D ligand 1-like	-	-	-
XP_006880750.1	568	E.edwardii	PREDICTED: uncharacterized protein LOC102855545 [Elephantulus edwardii]	-	-	-	-	consensus_disorder~consensus_disorder~consensus_disorder~consensus_disorder~consensus_disorder	O.afer	PREDICTED: leucine-rich repeat-containing protein 37B	-	-	-
XP_006900512.1	532	E.edwardii	PREDICTED: uncharacterized protein LOC102862516 [Elephantulus edwardii]	CLP1_N~CLP1_P	P-loop_containing_nucleoside_triphosphate_hydrolases	-	-	consensus_disorder~consensus_disorder~consensus_disorder	C.asiatica;E.telfairi;L.africana;O.afer;T.manatus	polyribonucleotide 5'-hydroxyl-kinase Clp1	-	-	-
XP_006882462.1	277	E.edwardii	PREDICTED: uncharacterized protein LOC102845775 [Elephantulus edwardii]	-	RNI-like	-	-	-	C.asiatica;E.telfairi;T.manatus	NLR family CARD domain-containing protein 4	-	-	-
XP_006890236.1	588	E.edwardii	PREDICTED: uncharacterized protein LOC102871779 [Elephantulus edwardii]	-	-	-	-	consensus_disorder~consensus_disorder~consensus_disorder	C.asiatica;L.africana;O.afer;T.manatus	NFAT activation molecule 1	-	-	-
XP_006893722.1	690	E.edwardii	PREDICTED: uncharacterized protein LOC102877421 [Elephantulus edwardii]	Myb_DNA-bind_4	-	-	-	consensus_disorder~consensus_disorder~consensus_disorder~consensus_disorder~consensus_disorder	C.asiatica;E.telfairi;O.afer;T.manatus	myb/SANT-like DNA-binding domain-containing protein 1	-	-	-
XP_006882792.1	248	E.edwardii	PREDICTED: uncharacterized protein LOC102866544 [Elephantulus edwardii]	MOZART1	-	-	-	consensus_disorder~consensus_disorder	C.asiatica;E.telfairi;O.afer;T.manatus	mitotic-spindle organizing protein 1	-	-	-
XP_006888068.1	625	E.edwardii	PREDICTED: uncharacterized protein LOC102853038 [Elephantulus edwardii]	Sushi~Sushi~Sushi	Complement_control_module/SCR_domain~Complement_control_module/SCR_domain~Complement_control_module/SCR_domain	-	Sushi/CCP/SCR_domain~Sushi/CCP/SCR_domain~Sushi/CCP/SCR_domain	consensus_disorder~consensus_disorder~consensus_disorder~consensus_disorder~consensus_disorder	C.asiatica;E.telfairi;L.africana;O.afer;T.manatus	membrane cofactor protein	-	-	-
XP_006893874.1	283	E.edwardii	PREDICTED: uncharacterized protein LOC102853500 [Elephantulus edwardii]	KKLCAg1	-	-	-	consensus_disorder	L.africana;O.afer;T.manatus	kita-kyushu lung cancer antigen 1	-	-	-
XP_006894770.1	630	E.edwardii	PREDICTED: uncharacterized protein LOC102869092 [Elephantulus edwardii]	IL31	-	-	-	consensus_disorder~consensus_disorder~consensus_disorder~consensus_disorder~consensus_disorder~consensus_disorder	C.asiatica;E.telfairi;O.afer;T.manatus	interleukin-31	-	-	-
XP_006880261.1	399	E.edwardii	PREDICTED: uncharacterized protein LOC102851036 [Elephantulus edwardii]	Erf4	-	-	-	consensus_disorder~consensus_disorder~consensus_disorder~consensus_disorder	C.asiatica;E.telfairi;L.africana;O.afer;T.manatus	golgin subfamily A member 7B	-	-	-
XP_006901466.1	264	E.edwardii	PREDICTED: uncharacterized protein LOC102867823 [Elephantulus edwardii]	Synuclein	Synuclein	Synuclein~Synuclein~Synuclein~Gamma-synuclein~Synuclein~Gamma-synuclein~Synuclein~Gamma-synuclein	-	consensus_disorder~consensus_disorder~consensus_disorder	C.asiatica;E.telfairi;L.africana;O.afer;T.manatus	gamma-synuclein	-	-	-
XP_006902933.1	404	E.edwardii	PREDICTED: uncharacterized protein LOC102858898 [Elephantulus edwardii]	Dysbindin	-	-	-	consensus_disorder~consensus_disorder~consensus_disorder~consensus_disorder~consensus_disorder	C.asiatica;E.telfairi;L.africana;O.afer;T.manatus	dysbindin domain-containing protein 1	-	-	-
XP_006893472.1	198	E.edwardii	PREDICTED: uncharacterized protein LOC102849515 [Elephantulus edwardii]	DNA_pol_delta_4	-	-	-	consensus_disorder~consensus_disorder~consensus_disorder~consensus_disorder	E.telfairi;L.africana;O.afer;T.manatus	DNA polymerase delta subunit 4	-	-	-
XP_006878969.1	463	E.edwardii	PREDICTED: uncharacterized protein LOC102856354 [Elephantulus edwardii]	MARVEL	-	-	MARVEL_domain	consensus_disorder~consensus_disorder	C.asiatica;E.telfairi;L.africana;T.manatus	CKLF-like MARVEL transmembrane domain-containing protein 3	-	-	-
XP_006879237.1	1227	E.edwardii	PREDICTED: uncharacterized protein LOC102858933 [Elephantulus edwardii]	-	-	-	-	consensus_disorder~consensus_disorder~consensus_disorder~consensus_disorder~consensus_disorder~consensus_disorder~consensus_disorder~consensus_disorder~consensus_disorder~consensus_disorder~consensus_disorder~consensus_disorder	C.asiatica;E.telfairi;L.africana;O.afer;T.manatus	brain-enriched guanylate kinase-associated protein	-	-	-
XP_006891445.1	417	E.edwardii	PREDICTED: uncharacterized protein LOC102853343 [Elephantulus edwardii]	BID	Bcl-2_inhibitors_of_programmed_cell_death	-	-	consensus_disorder~consensus_disorder	C.asiatica;E.telfairi;L.africana;O.afer;T.manatus	BH3-interacting domain death agonist	-	-	-
XP_006881080.1	444	E.edwardii	PREDICTED: uncharacterized protein C2orf73 homolog [Elephantulus edwardii]	GDWWSH	-	-	-	consensus_disorder~consensus_disorder~consensus_disorder~consensus_disorder~consensus_disorder~consensus_disorder~consensus_disorder~consensus_disorder	T.manatus	afrotheria-specific protein	-	-	-
XP_006884966.1	556	E.edwardii	PREDICTED: uncharacterized protein C8orf58 homolog [Elephantulus edwardii]	DUF4657	-	-	XP_012862891.1	consensus_disorder~consensus_disorder~consensus_disorder~consensus_disorder~consensus_disorder~consensus_disorder~consensus_disorder~consensus_disorder	C.asiatica;E.telfairi;L.africana;O.afer;T.manatus	afrotheria-specific protein	-	-	-
XP_006879207.1	73	E.edwardii	PREDICTED: uncharacterized protein C7orf73-like [Elephantulus edwardii]	DUF4535	-	-	-	-	C.asiatica;E.telfairi;O.afer;T.manatus	afrotheria-specific protein	-	-	-
XP_006894186.1	82	E.edwardii	PREDICTED: uncharacterized protein C7orf73-like [Elephantulus edwardii]	DUF4535	-	-	-	-	C.asiatica	afrotheria-specific protein	-	-	-
XP_006887281.1	316	E.edwardii	PREDICTED: uncharacterized protein LOC102853862 [Elephantulus edwardii]	Complex1_LYR_2	-	-	-	consensus_disorder~consensus_disorder~consensus_disorder	C.asiatica;E.telfairi;L.africana;O.afer;T.manatus	afrotheria-specific protein	-	-	-
XP_006888195.1	357	E.edwardii	PREDICTED: uncharacterized protein KIAA1644-like [Elephantulus edwardii]	-	-	-	-	consensus_disorder~consensus_disorder~consensus_disorder~consensus_disorder	C.asiatica;E.telfairi;L.africana;O.afer;T.manatus	afrotheria-specific protein	-	-	-
XP_006891896.1	465	E.edwardii	PREDICTED: uncharacterized protein LOC102844227 [Elephantulus edwardii]	-	-	-	-	consensus_disorder~consensus_disorder~consensus_disorder~consensus_disorder~consensus_disorder~consensus_disorder~consensus_disorder	C.asiatica;E.telfairi;L.africana;O.afer;T.manatus	afrotheria-specific protein	-	-	-
XP_006894151.1	211	E.edwardii	PREDICTED: uncharacterized protein LOC102855947 [Elephantulus edwardii]	-	-	-	-	consensus_disorder~consensus_disorder~consensus_disorder	C.asiatica;L.africana;T.manatus	afrotheria-specific protein	-	-	-
XP_006900704.1	538	E.edwardii	PREDICTED: uncharacterized protein LOC102850000 [Elephantulus edwardii]	Lipocalin~Lipocalin	Lipocalins~Lipocalins	Beta-lactoglobulin~Beta-lactoglobulin~Beta-lactoglobulin~Beta-lactoglobulin~Beta-lactoglobulin	-	consensus_disorder~consensus_disorder~consensus_disorder~consensus_disorder~consensus_disorder	C.asiatica;O.afer	afrotheria-specific lipocalin containing protein	-	-	-
XP_006898661.1	428	E.edwardii	PREDICTED: uncharacterized protein C4orf19-like [Elephantulus edwardii]	HATPase_c~DUF4699	ATPase_domain_of_HSP90_chaperone/DNA_topoisomerase_II/histidine_kinase	90kDa_heat_shock_protein~90kDa_heat_shock_protein~90kDa_heat_shock_protein~90kDa_heat_shock_protein~90kDa_heat_shock_protein	-	consensus_disorder~consensus_disorder~consensus_disorder	C.asiatica;E.telfairi;L.africana;O.afer;T.manatus	afrotheria-specific Histidine kinase domain containing protein	-	-	-
XP_012863001.1	1043	E.telfairi	PREDICTED: uncharacterized protein LOC101660933 [Echinops telfairi]	zf-C2H2~zf-C2H2~DUF3669~DUF3669~KRAB~KRAB	KRAB_domain_(Kruppel-associated_box)~KRAB_domain_(Kruppel-associated_box)~beta-beta-alpha_zinc_fingers~beta-beta-alpha_zinc_fingers	-	Krueppel-associated_box_(KRAB)~Krueppel-associated_box_(KRAB)~Zinc_finger_C2H2_type_domain~Zinc_finger_C2H2_type_domain~Zinc_finger_C2H2_type_domain~Zinc_finger_C2H2_type_domain	consensus_disorder~consensus_disorder~consensus_disorder~consensus_disorder~consensus_disorder~consensus_disorder~consensus_disorder	C.asiatica;E.edwardii;L.africana;O.afer;T.manatus	PREDICTED: zinc finger protein	GO:0003676	GO:0003676	nucleic acid binding
XP_012863897.1	229	E.telfairi	PREDICTED: uncharacterized protein C20orf85 homolog [Echinops telfairi]	LLC1	-	-	-	consensus_disorder	C.asiatica;E.edwardii;L.africana;O.afer;T.manatus	afrotheria-specific Low in Lung Cancer 1 protein	-	-	-

## Sheet: S2B-Func_prediction
Table S2B- Function prediction for species-unique proteins
N – no prediction
Protein RefSeq ID	Species	Length (aa)	Protein description	Low-complexity length (aa) and in percentage (%)	Singal peptide (Predisi/SignalP/Phobius/ SecretomeP)	Transmembrane region (TMHMM/Phobius/TOPCON)	Disorder region (iupred)	GO BP (ffpred)	GO MF (ffpred)	GO CC (ffpred)	Protein-binding disorder region	CATH domain (pgenThreader/pdomthreader/ domsurf) (alignment length)	Pfam	Superfamily	3-D structure (psipred)	Potential function
XP_023410057.1	L.africana	266	uncharacterized protein LOC111752025	11 (4%)	N/N/N/N	N/N/N	Globular in the region of 27-264	GO:0019222: regulation of metabolic process	GO:0003824: catalytic activity	GO:0005739: mitochondrion	N	N/Cysteine proteinases (129)	N	Cysteine_proteinases (54001)	partial	Proteinase
XP_023411290.1	L.africana	141	uncharacterized protein LOC111752327	49 (35%)	N/N/N/N	N/N/N	instrinscially disordered protein	GO:0006413: translational initiation	GO:0003676: nucleic acid binding	GO:0005743: mitochondrial inner membrane	133-141	N	N	N	complete	NA binding
XP_023406697.1	L.africana	258	uncharacterized protein LOC111751266	7 (3%)	N/N/N/N	N/N/N	Globular in the region of 1-147	GO:0019222: regulation of metabolic process	GO:0000166: nucleotide binding	GO:0005739: mitochondrion	N	N	N	N	complete	NA binding
XP_023399464.1	L.africana	290	uncharacterized protein LOC104845531 isoform X1	24 (8%)	N/N/N/N	N/N/N	Globular in the region of 33-228	GO:0010468: regulation of gene expression	GO:0003676: nucleic acid binding	N	6-19, 228-230, 234-236	N	N	N	complete	NA binding
XP_023407693.1	L.africana	247	uncharacterized protein LOC111751491	25 (10%)	N/N/N/N	N/N/N	Globular in the region of 1-123, 181-229	GO:0010468: regulation of gene expression	GO:0016740: transferase activity	GO:0016020: membrane	1-19	N	N	N	complete	Protein binding
XP_023398370.1	L.africana	313	uncharacterized protein LOC111749269	33 (11%)	N/N/N/Y	N/N/N	Globular in the region of 140-313	GO:0019222: regulation of metabolic process	GO:0016301: kinase activity	N	134-136	Delta-retroviral matrix (114)	N	N	complete	Protein binding
XP_010589893.2	L.africana	147	beta-defensin116	0 (0%)	N/N/N/N	o57-79i/o57-79i/o55-75i	Globular in the region of 1-147	GO:0019222: regulation of metabolic process	GO:0015077: monovalent inorganic cation transmembrane transporter activity	GO:0016020: membrane	129-147	N	Beta defensin (PF13841.5)	N	complete	Beta defensin (sequence is extremely diverged)
XP_023396175.1	L.africana	202	uncharacterized protein LOC111748348	12 (6%)	N/N/N/N	i99-121o/i98-120o	Globular in the region of 1-202	GO:0019222: regulation of metabolic process	GO:0003676: nucleic acid binding	N	N	N	N	N	partial	Could not predict
XP_023398298.1	L.africana	330	uncharacterized protein LOC111749203	116 (35%)	pos:47/N/N/N	N/N/N	Globular in the region of 23-330	GO:1903506: regulation of nucleic acid-templated transcription	GO:0016740: transferase activity	GO:0005739: mitochondrion	13-17	N	N	N	partial	Could not predict
XP_023406990.1	L.africana	209	uncharacterized protein LOC111751309	9 (4%)	N/N/N/N	N/N/N	Globular in the region of 87-209	GO:0034645: cellular macromolecule biosynthetic process	GO:0000166: nucleotide binding	GO:0005730: nucleolus	1-19	N	N	N	partial	Could not predict
XP_023406998.1	L.africana	243	uncharacterized protein LOC111751333	38 (16%)	N/N/N/Y	N/N/i171-191o	Globular in the region of 118-243	GO:0019222: regulation of metabolic process	GO:0003824: catalytic activity	GO:0005739: mitochondrion	85-95, 221-239	N	N	N	partial	Could not predict
XP_023407950.1	L.africana	78	uncharacterized protein LOC100663619	22 (28%)	N/N/N/Y	N/N/N	instrinscially disordered protein	N	N	N	N	N	N	N	N	Could not predict
XP_023409906.1	L.africana	210	uncharacterized protein LOC111751966	0 (0%)	N/N/N/Y	N/N/N	Globular in the region of 1-100, 164-206	GO:0010468: regulation of gene expression	GO:0003677: DNA binding	N	10-12	N	N	N	partial	Could not predict
XP_023414441.1	L.africana	263	uncharacterized protein LOC104846731	18 (7%)	N/N/N/N	N/o205-224i/N	Globular in the region of 1-263	GO:0019222: regulation of metabolic process	GO:0015077: monovalent inorganic cation transmembrane transporter activity	GO:0031224: intrinsic component of membrane	1-6, 117-131	N	N	N	partial	Could not predict
XP_023414523.1	L.africana	212	uncharacterized protein LOC111753013	42 (20%)	N/N/N/Y	N/N/N	Globular in the region of 59-212	GO:0010468: regulation of gene expression	GO:0001228 and GO:0003676: RNA polymerase II transcription regulatory region sequence-specific DNA binding transcription factor activity involved in positive regulation of transcription and nucleic acid binding	GO:0005730: nucleolus	28-39	N	N	N	partial	Could not predict
XP_023414939.1	L.africana	346	uncharacterized protein LOC111753094	52 (15%)	N/N/N/N	N/N/N	Globular in the region of 1-169, 217-254	GO:1903506: regulation of nucleic acid-templated transcription	GO:0001071: nucleic acid binding transcription factor activity	GO:0005739: mitochondrion	1-22, 61-63, 173-182, 275-285	N	N	N	partial	Could not predict
XP_023415279.1	L.africana	229	uncharacterized protein LOC111753167	14 (6%)	N/N/N/N	N/N/N	Globular in the region of 26-229	GO:1903506: regulation of nucleic acid-templated transcription	GO:0046914: transition metal ion binding	GO:0005743: mitochondrial inner membrane	7-12	N	N	N	partial	Could not predict
XP_023581683.1	T.manatus	211	uncharacterized protein LOC111819463	21 (10%)	Pos:46/N/Pos:41/N	N/N/N	Globular in the region of 27-211	GO:0010468: regulation of gene expression	GO:0001071: nucleic acid binding transcription factor activity	GO:0016020: membrane	1-27	N	N	N	partial	Could not predict
XP_023584307.1	T.manatus	640	uncharacterized protein LOC111820014	12 (2%)	N/N/N/N	N/N/N	Globular in the region of 1-640	GO:0044281: small molecule metabolic process	GO:0003824: catalytic activity	GO:0005739: mitochondrion	8-13	Gamma-tubulin complex-C-terminal domain (350)	N	N	partial	Could not predict
XP_023584962.1	T.manatus	207	uncharacterized protein LOC111820156	20 (10%)	N/N/N/N	N/N/N	Globular in the region of 47-207	GO:0010468: regulation of gene expression	GO:0003676: nucleic acid binding	GO:0031224: intrinsic component of membrane	N	N	N	N	partial	Could not predict
XP_023586023.1	T.manatus	264	uncharacterized protein LOC111820352	74 (28%)	N/N/N/N	N/N/N	Globular in the region of 63-264	GO:1903506: regulation of nucleic acid-templated transcription	GO:0003676: nucleic acid binding	GO:0005739: mitochondrion	52-54,95-103	N	N	N	partial	Could not predict
XP_023590469.1	T.manatus	98	protein FAM236B-like	0 (0%)	N/N/N/Y	N/N/N	Globular in the region of 1-77	N	N	N	N	N	N	N	N	Could not predict
XP_023593591.1	T.manatus	252	uncharacterized protein LOC111821830	0 (0%)	N/N/N/Y	N/N/N	Globular in the region of 48-104	GO:0010468: regulation of gene expression	GO:0001071: nucleic acid binding transcription factor activity	GO:0005730: nucleolus	1-26, 185-193, 222-226	N	N	N	partial	Could not predict
XP_007935975.1	O.afer	282	uncharacterized protein LOC103194397	13 (5%)	N/N/N/N	N/N/N	Globular	GO:0034645: cellular macromolecule biosynthetic process	GO:0003676: nucleic acid binding	GO:0005739: mitochondrion	107-116	N	N	N	N	Could not predict
XP_007939961.1	O.afer	54	probable Xaa-Pro aminopeptidase 3	0 (0%)	N/N/N/N	i21-o43/i20-o40/i20-o40	Globular	GO:0055085: transmembrane transport	GO:0005215: transporter activity	GO:0016021: integral component of membrane	N	N	N	N	N	Could not predict
XP_006875281.1	C.asiatica	378	uncharacterized protein LOC102831835	16 (4%)	N/N/N/N	N/N/N	Globular in the region of 1-17, 55-60, 127-140, 169-187, 352-378	GO:0045333: cellular respiration	GO:0003676: nucleic acid binding	GO:0031966: mitochondrial membrane	1-5, 38-42, 352-353, 359-378	N	N	N	N	Could not predict
XP_006881431.1	E.edwardii	270	PREDICTED: uncharacterized protein LOC102860966	80 (30%)	N/N/N/Y	N/N/N	Globular in the region of 8-135	GO:1903506: regulation of nucleic acid-templated transcription	GO:0003676: nucleic acid binding	GO:0005739:mitochondrion	45-56, 230-235, 258-270	Parvovirus coat protein VP1/VP2 (204)	N	N	partial	Could not predict
XP_006888930.1	E.edwardii	206	uncharacterized protein LOC102863381	0 (0%)	N/N/N/Y	N/N/N	instrinscially disordered protein	GO:0019222: regulation of metabolic process	GO:0015631 and GO:0003676:tubulin and nucleic acid binding	GO:0005730: nucleolus	1-16, 198-206	N	N	N	partial	Could not predict
