# Supplementary material for: Signatures of conserved and unique molecular features in Afrotheria
Source: Springer Nature journal article supplement (doi:10.1038/s41598-020-79559-6), 2021-01-13
Supplement: MOESM3 [file 41598_2020_79559_MOESM3_ESM.xls]

## Sheet: S3A-norm.frequency
Includes Supplementary tables S3A, S3B, S3C, S3D
Table S3A- Distribution of functional domains in Afrotheria and reference species
Values in the table are normalized frequency scores showing the number of proteins in a proteome with the particular domain; * implies partially associated domains; in red are domain families that are present in more proteins in one or more Afrotherian proteomes as compared to the human proteome.
Pfam ID	Domain type	Domain name	Domain description	L. africana	T. manatus	O. afer	C. asiatica	E. edwardii	E. telfairi	H. sapiens	M. musculus	E. caballus	B. taurus	highlights
PF13853	Family	7tm_4	Olfactory receptor	1224	414	680	610	497	609	230	572	675	625	high number in Afrotherial species
PF01352	Family	KRAB	KRAB box	173	195	133	117	104	100	214	190	160	136	high number in H. sapiens
PF00096	Domain	zf-C2H2	Zinc finger, C2H2 type	297	330	311	288	242	254	334	282	281	256	high number in H. sapiens
PF03402	Family	V1R	Vomeronasal organ pheromone receptor family, V1R	15	7	5	4	7	5	3	103	20	12	high number in M. musculus
PF02513	Repeat	Spin-Ssty	Spin/Ssty Family	3	4	2	1	2	2	3	98	3	3	high number in M. musculus
PF04822	Family	Takusan	Takusan	1	1	1	1	1	1	1	68	1	1	high number in M. musculus
PF01094	Family	ANF_receptor	Receptor family ligand binding region	19	22	21	22	21	27	19	83	23	18	high number in M. musculus
PF00003	Family	7tm_3	7 transmembrane sweet-taste receptor of 3 GCPR	13	15	14	12	12	22	12	75	15	13	high number in M. musculus
PF07562	Family	NCD3G	Nine Cysteines Domain of family 3 GPCR	9	8	9	7	7	18	7	70	10	8	high number in Afrotherial species
PF04803	Family	Cor1	Cor1/Xlr/Xmr conserved region	2	1	1	1	1	1	2	43	1	1	high number in M. musculus
PF00125	Domain	Histone	Core histone H2A/H2B/H3/H4	38	41	35	38	36	17	38	40	40	62	high number in B. taurus
PF00047	Domain	ig	Immunoglobulin domain	21	22	21	22	22	19	48	28	32	26	high number in H. sapiens
PF12796	Repeat	Ank_2	Ankyrin repeats (3 copies)	98	109	109	109	103	108	127	103	102	106	high number in H. sapiens
PF00240	Domain	ubiquitin	Ubiquitin family	21	22	24	28	47	23	23	23	24	25	high number in Afrotherial species
PF05296	Family	TAS2R	Taste receptor protein (TAS2R)	12	12	10	7	11	13	14	37	13	12	high number in M. musculus
PF00143	Domain	Interferon	Interferon alpha/beta domain	10	8	5	6	4	4	10	16	13	30	high number in B. taurus
PF15974	Family	Cadherin_tail	Cadherin C-terminal cytoplasmic tail, catenin-binding region	1	1	1	1	1	1	21	20	1	3	high number in H. sapiens & M. musculus
PF00069	Domain	Pkinase	Protein kinase domain	177	197	192	191	184	197	196	191	183	186
PF00046	Domain	Homeodomain	Homeodomain	105	120	113	115	111	106	125	124	113	111
PF00076	Domain	RRM_1	RNA recognition motif. (a.k.a. RRM, RBD, or RNP domain)	96	107	103	110	121	108	115	107	100	109
PF07686	Domain	V-set	Immunoglobulin V-set domain	77	78	78	86	78	79	89	85	98	93
PF00059	Domain	Lectin_C	Lectin C-type domain	51	51	41	44	38	41	49	60	56	56
PF00067	Domain	p450	Cytochrome P450	33	32	32	28	39	34	35	51	45	36
PF07654	Domain	C1-set	Immunoglobulin C1-set domain	33	23	27	19	21	21	25	31	39	34
PF13912	Domain	zf-C2H2_6	C2H2-type zinc finger	29	35	37	32	22	29	24	36	26	16
PF12440	Family	MAGE_N	Melanoma associated antigen family N terminal	27	14	10	13	15	10	13	8	13	27
PF13895	Domain	Ig_2	Immunoglobulin domain	27	29	24	28	25	23	45	29	41	34	high number in H. sapiens & E. callabus
PF00089	Domain	Trypsin	Trypsin	60	64	67	69	76	68	64	78	78	70
PF00028	Domain	Cadherin	Cadherin domain	50	61	56	56	53	59	64	64	48	46
PF08266	Domain	Cadherin_2	Cadherin-like	23	30	26	28	24	25	36	36	21	18
PF13885	Family	Keratin_B2_2	Keratin, high sulfur B2 protein	8	8	17	9	15	6	22	24	14	15	high number in H. sapiens & M. musculus
PF13520	Family	AA_permease_2	Amino acid permease	8	9	8	8	7	8	7	8	25	21	high number in E. callabus & B. taurus
PF13906	Domain	AA_permease_C	C-terminus of AA_permease	3	3	3	3	2	3	2	3	18	16	high number in E. callabus & B. taurus
PF00001	Family	7tm_1	7 transmembrane receptor (rhodopsin family)	146	160	158	154	150	161	158	149	157	156
PF00651	Domain	BTB	BTB/POZ domain	66	74	75	73	68	74	73	84	71	70
PF13927	Domain	Ig_3	Immunoglobulin domain	63	68	60	58	65	66	74	57	68	69
PF00622	Family	SPRY	SPRY domain	50	50	43	49	44	39	52	38	48	43
PF00038	Coiled-coil	Filament	Intermediate filament protein	39	42	41	49	43	31	40	34	42	41
PF00443	Family	UCH	Ubiquitin carboxyl-terminal hydrolase	30	29	29	28	27	30	44	29	27	28	high number in H. sapiens
PF13765	Family	PRY	SPRY-associated domain	30	30	26	30	28	19	24	18	27	20
PF00005	Domain	ABC_tran	ABC transporter	28	31	30	29	28	31	27	27	30	44
PF15227	Domain	zf-C3HC4_4	zinc finger of C3HC4-type, RING	25	26	18	19	18	13	26	15	20	16
PF01454	Family	MAGE	MAGE family	24	14	10	12	10	10	11	10	17	19	high number in Afrotherial species
PF00061	Domain	Lipocalin	Lipocalin / cytosolic fatty-acid binding protein family	18	15	20	21	16	17	18	31	26	24
PF00079	Domain	Serpin	Serpin (serine protease inhibitor)	18	20	19	19	24	21	20	33	23	28
PF00664	Family	ABC_membrane	ABC transporter transmembrane region	13	14	14	13	13	14	13	12	14	30
PF00129	Domain	MHC_I	Class I Histocompatibility antigen, domains alpha 1 and 2	10	7	11	10	9	7	10	21	17	19
PF13841	Family	Defensin_beta_2	Beta defensin	8	9	4	2	4	2	18	9	10	10	high number in H. sapiens
PF00026	Family	Asp	Eukaryotic aspartyl protease	6	6	6	6	7	6	6	5	8	21
PF13855	Repeat	LRR_8	Leucine rich repeat	91	97	94	94	92	96	98	86	91	90
PF00169	Domain	PH	PH domain	87	97	96	95	91	91	101	89	98	96
PF00041	Domain	fn3	Fibronectin type III domain	69	80	79	75	76	75	77	69	77	72
PF07714	Domain	Pkinase_Tyr	Protein tyrosine kinase	66	75	72	71	70	74	71	65	67	66
PF00071	Domain	Ras	Ras family	64	74	72	76	73	74	75	66	70	70
PF02023	Domain	SCAN	SCAN domain	34	37	28	31	35	26	33	23	32	35
PF00048	Domain	IL8	Small cytokines (intecrine/chemokine), interleukin-8 like	19	19	18	19	16	17	25	28	21	22
PF16492	Family	Cadherin_C_2	Cadherin cytoplasmic C-terminal	14	19	19	20	16	18	24	23	13	12
PF01284	Domain	MARVEL	Membrane-associating domain	12	12	14	15	13	14	14	12	18	25
PF00201	Family	UDPGT	UDP-glucoronosyl and UDP-glucosyl transferase	10	4	3	3	3	3	12	11	11	10
PF07966	Motif	A1_Propeptide	A1 Propeptide	4	4	5	4	4	4	3	4	6	17	high number in B. taurus
PF00137	Family	ATP-synt_C	ATP synthase subunit C	3	3	3	4	15	5	3	3	3	3	high number in Afrotherial species
PF00075	Domain	RNase_H	RNase H	2	1	14	1	1	2	1	9	2	1	high number in Afrotherial species
PF00103	Domain	Hormone_1	Somatotropin hormone family	1	1	1	1	1	1	3	14	1	7	high number in M. musculus & B. taurus
PF05831	Family	GAGE	GAGE protein	1	1	1	1	1	1	12	1	2	9	high number in H. sapiens & B. taurus
PF01198	Family	Ribosomal_L31e	Ribosomal protein L31e	1	1	1	12	4	1	1	1	1	1	high number in Afrotherial species
PF01655	Family	Ribosomal_L32e	Ribosomal protein L32	1	1	1	5	12	2	1	1	1	1	high number in Afrotherial species
PF03247	Family	Prothymosin	Prothymosin/parathymosin family	1	3	3	14	1	5	2	1	4	2	high number in Afrotherial species
PF00400	Repeat	WD40	WD domain, G-beta repeat	71	77	76	74	74	75	75	67	69	73
PF00168	Domain	C2	C2 domain	60	68	66	68	66	68	68	61	64	64
PF00595	Domain	PDZ	PDZ domain	60	72	69	68	66	69	71	64	68	67
PF00520	Family	Ion_trans	Ion transport protein	55	60	62	60	58	61	59	54	57	57
PF00643	Domain	zf-B_box	B-box zinc finger	40	38	34	35	33	32	40	32	38	36
PF14604	Domain	SH3_9	Variant SH3 domain	37	44	45	44	46	43	44	39	42	42
PF00008	Domain	EGF	EGF-like domain	29	38	33	35	31	34	36	30	36	29
PF00084	Domain	Sushi	Sushi repeat (SCR repeat)	25	27	27	27	24	26	28	26	28	34
PF00566	Family	RabGAP-TBC	Rab-GTPase-TBC domain	19	22	20	20	21	20	28	19	21	19
PF00617	Family	RasGEF	RasGEF domain	15	19	16	16	14	16	16	14	25	14
PF16211	Family	Histone_H2A_C	C-terminus of histone H2A	14	14	14	14	14	7	13	12	13	17
PF00530	Domain	SRCR	Scavenger receptor cysteine-rich domain	12	12	12	12	10	11	11	12	13	22	high number in B. taurus
PF00618	Domain	RasGEF_N	RasGEF N-terminal motif	12	14	10	12	10	11	11	18	14	10
PF01423	Domain	LSM	LSM domain	11	11	10	14	20	13	10	10	10	11
PF00248	Domain	Aldo_ket_red	Aldo/keto reductase family	10	6	9	7	7	5	9	10	14	12
PF02758	Domain	PYRIN	PAAD/DAPIN/Pyrin domain	9	11	8	6	8	7	12	15	9	7
PF00050	Domain	Kazal_1	Kazal-type serine protease inhibitor domain	6	8	4	5	5	6	7	9	11	13
PF14672	Family	LCE	Late cornified envelope	5	1	1	2	3	1	10	10	4	4	high number in H. Sapiens & M. musculus
PF15371	Family	DUF4599	Domain of unknown function (DUF4599)	5	5	3	3	1	2	7	5	12	5
PF03172	Domain	HSR	HSR domain	4	4	3	2	2	2	3	12	3	3	high number in M. musculus
PF14650	Family	FAM75	FAM75 family	4	4	1	4	2	1	7	8	10	4
PF01099	Domain	Uteroglobin	Uteroglobin family	3	1	2	1	3	1	6	9	6	4
PF00210	Domain	Ferritin	Ferritin-like domain	3	4	3	3	13	3	3	7	5	4	high number in Afrotherial species
PF01101	Family	HMG14_17	HMG14 and HMG17	3	3	2	9	8	2	2	2	3	4
PF15229	Family	POM121	POM121 family	3	2	2	2	2	1	11	1	2	3	high number in H. sapiens
PF01667	Family	Ribosomal_S27e	Ribosomal protein S27	2	2	1	2	5	12	1	2	1	3	high number in Afrotherial species
PF02800	Domain	Gp_dh_C	Glyceraldehyde 3-phosphate dehydrogenase, C-terminal domain	2	1	8	5	3	7	1	2	1	1
PF00338	Family	Ribosomal_S10	Ribosomal protein S10p/S20e	2	2	2	4	11	2	2	2	2	3	high number in Afrotherial species
PF00428	Family	Ribosomal_60s	60s Acidic ribosomal protein	2	2	2	3	13	5	2	3	2	2	high number in Afrotherial species
PF00711	Domain	Defensin_beta	Beta defensin	2	1	1	1	1	1	5	10	3	7
PF01221	Domain	Dynein_light	Dynein light chain type 1	2	2	2	7	10	4	2	2	2	5	high number in Afrotherial species
PF00833	Family	Ribosomal_S17e	Ribosomal S17	1	1	1	2	12	1	1	1	1	1	high number in Afrotherial species
PF01775	Domain	Ribosomal_L18A	Ribosomal proteins 50S-L18Ae/60S-L20/60S-L18A	1	1	1	1	10	1	1	1	1	1	high number in Afrotherial species
PF04548	Domain	AIG1	AIG1 family	1	1	1	1	1	1	5	5	9	8	high number in reference species
PF06758	Domain	Olduvai	Olduvai domain	1	1	1	1	1	1	10	1	5	3	high number in H. sapiens
PF09341	Family	Pcc1	Transcription factor Pcc1	1	1	1	2	2	1	2	3	2	10	high number in B. taurus
PF07679	Domain	I-set	Immunoglobulin I-set domain	75	78	76	79	74	80	77	74	76	75
PF00271	Family	Helicase_C	Helicase conserved C-terminal domain	55	61	59	57	56	58	60	55	57	54
PF00018	Domain	SH3_1	SH3 domain	51	52	52	51	48	53	54	51	52	50
PF00010	Domain	HLH	Helix-loop-helix DNA-binding domain	51	56	59	58	56	55	58	54	56	55
PF00017	Domain	SH2	SH2 domain	51	54	54	54	53	55	56	51	54	53
PF13499	Domain	EF-hand_7	EF-hand domain pair	43	48	51	45	47	48	48	47	47	48
PF01391	Repeat	Collagen	Collagen triple helix repeat (20 copies)	40	44	43	43	41	42	43	39	40	44
PF07645	Domain	EGF_CA	Calcium-binding EGF domain	37	41	41	40	40	42	39	36	42	43
PF00621	Domain	RhoGEF	RhoGEF domain	36	40	39	39	37	40	40	34	39	38
PF00270	Domain	DEAD	DEAD/DEAH box helicase	35	38	36	36	35	35	38	34	38	34
PF00620	Domain	RhoGAP	RhoGAP domain	34	37	34	35	33	36	37	33	35	33
PF01344	Repeat	Kelch_1	Kelch motif	32	35	33	34	33	36	35	30	33	31
PF00536	Domain	SAM_1	SAM domain (Sterile alpha motif)	30	32	34	34	31	35	34	31	34	34
PF07690	Family	MFS_1	Major Facilitator Superfamily	30	33	30	31	33	34	32	28	34	32
PF00153	Family	Mito_carr	Mitochondrial carrier protein	28	30	31	30	30	32	30	27	27	31
PF07707	Domain	BACK	BTB And C-terminal Kelch	28	33	34	33	30	34	34	29	34	32
PF00002	Family	7tm_2	7 transmembrane receptor (Secretin family)	27	30	27	27	27	29	27	23	29	30
PF00090	Family	TSP_1	Thrombospondin type 1 domain	27	30	31	30	31	30	30	28	28	27
PF07653	Domain	SH3_2	Variant SH3 domain	26	32	28	28	29	29	31	27	28	26
PF00104	Domain	Hormone_recep	Ligand-binding domain of nuclear hormone receptor	25	28	28	28	26	30	27	25	25	26
PF00431	Domain	CUB	CUB domain	24	27	26	26	26	26	27	25	27	30
PF01421	Domain	Reprolysin	Reprolysin (M12B) family zinc metalloprotease	24	24	26	24	25	25	21	27	26	28
PF00505	Domain	HMG_box	HMG (high mobility group) box	23	25	26	27	29	25	27	25	26	30
PF02214	Domain	BTB_2	BTB/POZ domain	23	27	28	27	27	24	28	25	26	26
PF01562	Family	Pep_M12B_propep	Reprolysin family propeptide	23	26	26	25	25	25	22	29	27	29
PF13637	Domain	Ank_4	Ankyrin repeats (many copies)	23	22	22	27	25	25	23	24	25	22
PF00057	Repeat	Ldl_recept_a	Low-density lipoprotein receptor domain class A	22	24	23	21	20	25	24	23	23	24
PF00787	Domain	PX	PX domain	22	27	27	26	28	26	27	24	25	24
PF12937	Domain	F-box-like	F-box-like	22	25	24	26	24	22	23	28	21	24
PF00225	Domain	Kinesin	Kinesin motor domain	21	26	25	26	24	27	25	23	24	24
PF00250	Domain	Forkhead	Forkhead domain	21	24	24	24	23	19	28	22	24	24
PF00179	Domain	UQ_con	Ubiquitin-conjugating enzyme	20	21	20	23	27	24	22	22	21	20
PF01825	Motif	GPS	GPCR proteolysis site, GPS, motif	20	21	18	17	19	17	18	15	20	21
PF13920	Domain	zf-C3HC4_3	Zinc finger, C3HC4 type (RING finger)	20	24	27	24	24	23	25	21	24	20
PF00782	Domain	DSPc	Dual specificity phosphatase, catalytic domain	19	21	21	22	20	23	20	18	19	19
PF07647	Domain	SAM_2	SAM domain (Sterile alpha motif)	18	21	19	19	19	19	22	17	20	17
PF01023	Domain	S_100	S-100/ICaBP type calcium binding domain	17	15	16	19	20	13	15	14	16	14
PF00122	Family	E1-E2_ATPase	E1-E2 ATPase	16	21	20	22	19	20	19	17	19	19
PF00685	Domain	Sulfotransfer_1	Sulfotransferase domain	16	17	20	19	19	18	18	19	24	16
PF00022	Family	Actin	Actin	16	17	16	16	20	16	16	13	17	15
PF13833	Domain	EF-hand_8	EF-hand domain pair	16	17	15	15	14	13	14	13	13	17
PF00822	Family	PMP22_Claudin	PMP-22/EMP/MP20/Claudin family	15	20	20	20	19	20	19	19	20	18
PF00200	Domain	Disintegrin	Disintegrin	15	15	16	14	14	16	11	18	17	19
PF00335	Family	Tetraspanin	Tetraspanin family	15	19	19	18	19	19	18	15	18	18
PF07648	Domain	Kazal_2	Kazal-type serine protease inhibitor domain	15	15	14	15	15	14	19	19	16	15
PF13445	Domain	zf-RING_UBOX	RING-type zinc-finger	15	18	17	15	15	16	19	17	18	19
PF00501	Family	AMP-binding	AMP-binding enzyme	13	16	16	19	14	17	17	15	15	15
PF08205	Domain	C2-set_2	CD80-like C2-set immunoglobulin domain	13	14	18	18	19	16	15	17	19	16
PF00097	Domain	zf-C3HC4	Zinc finger, C3HC4 type (RING finger)	12	12	11	10	10	8	14	12	13	13
PF00627	Domain	UBA	UBA/TS-N domain	12	14	14	13	17	12	14	12	14	13
PF08516	Family	ADAM_CR	ADAM cysteine-rich	12	13	16	13	14	15	10	17	16	18
PF13465	Domain	zf-H2C2_2	Zinc-finger double domain	12	11	9	8	8	8	7	14	10	6
PF13857	Domain	Ank_5	Ankyrin repeats (many copies)	12	15	10	12	11	14	13	16	11	12
PF13424	Repeat	TPR_12	Tetratricopeptide repeat	11	15	14	15	14	11	14	10	13	13
PF05729	Domain	NACHT	NACHT domain	11	14	10	11	12	11	14	17	12	12
PF00612	Motif	IQ	IQ calmodulin-binding motif	10	13	13	12	13	15	12	11	12	15
PF00619	Domain	CARD	Caspase recruitment domain	10	14	12	12	10	12	15	12	12	12
PF04103	Family	CD20	CD20-like family	10	11	8	7	9	7	10	11	11	7
PF00160	Domain	Pro_isomerase	Cyclophilin type peptidyl-prolyl cis-trans isomerase/CLD	9	11	10	11	16	11	14	9	12	11
PF00583	Family	Acetyltransf_1	Acetyltransferase (GNAT) family	9	10	9	10	10	11	10	14	12	10
PF04826	Family	Arm_2	Armadillo-like	9	5	6	6	3	7	7	6	6	7
PF00031	Domain	Cystatin	Cystatin domain	9	9	9	9	8	10	10	15	9	10
PF02798	Domain	GST_N	Glutathione S-transferase, N-terminal domain	9	8	5	8	12	5	9	10	11	9
PF00014	Domain	Kunitz_BPTI	Kunitz/Bovine pancreatic trypsin inhibitor domain	8	9	8	9	8	10	10	10	10	16
PF00135	Domain	COesterase	Carboxylesterase family	8	9	7	7	8	7	8	13	10	8
PF16208	Family	Keratin_2_head	Keratin type II head	8	8	9	10	12	5	8	8	11	11
PF00631	Domain	G-gamma	GGL domain	8	9	5	7	7	6	10	9	9	9
PF02263	Domain	GBP	Guanylate-binding protein, N-terminal domain	8	6	4	7	4	4	6	7	5	8
PF00095	Domain	WAP	WAP-type (Whey Acidic Protein) 'four-disulfide core'	7	7	9	7	7	6	9	10	8	12
PF00337	Domain	Gal-bind_lectin	Galactoside-binding lectin	7	6	6	6	7	9	10	5	9	8
PF01248	Domain	Ribosomal_L7Ae	Ribosomal protein L7Ae/L30e/S12e/Gadd45 family	7	8	8	7	13	10	6	10	8	7
PF01273	Family	LBP_BPI_CETP	LBP / BPI / CETP family, N-terminal domain	7	7	7	7	8	7	7	8	12	10
PF00702	Domain	Hydrolase	haloacid dehalogenase-like hydrolase	6	6	9	9	8	11	7	8	7	8
PF05577	Domain	Peptidase_S28	Serine carboxypeptidase S28	6	7	2	3	2	1	2	2	2	2
PF00021	Domain	UPAR_LY6	u-PAR/Ly-6 domain	6	9	8	8	6	7	10	14	8	6
PF02841	Domain	GBP_C	Guanylate-binding protein, C-terminal domain	6	5	2	5	2	1	4	5	3	6
PF04538	Family	BEX	Brain expressed X-linked like family	6	9	9	9	4	7	8	6	8	6
PF13193	Domain	AMP-binding_C	AMP-binding enzyme C-terminal domain	6	9	9	12	9	9	10	7	9	8
PF00062	Domain	Lys	C-type lysozyme/alpha-lactalbumin family	5	5	4	3	4	6	5	5	4	9
PF04505	Family	CD225	Interferon-induced transmembrane protein	5	8	9	5	7	8	7	7	7	10
PF06623	Family	MHC_I_C	MHC_I C-terminus	5	3	2	3	1	1	2	1	6	3
PF08246	Domain	Inhibitor_I29	Cathepsin propeptide inhibitor domain (I29)	5	4	5	6	3	4	4	10	5	4
PF14820	Family	SPRR2	Small proline-rich 2	5	1	2	1	1	1	3	5	4	1
PF00043	Domain	GST_C	Glutathione S-transferase, C-terminal domain	4	8	6	6	6	7	7	9	4	4
PF07719	Repeat	TPR_2	Tetratricopeptide repeat	4	8	4	5	7	4	6	3	4	5
PF07859	Domain	Abhydrolase_3	alpha/beta hydrolase fold	4	5	5	5	4	4	4	9	4	4
PF05049	Family	IIGP	Interferon-inducible GTPase (IIGP)	3	4	3	3	1	2	1	9	1	2
PF00131	Domain	Metallothio	Metallothionein	3	3	2	6	2	2	6	2	4	3
PF01253	Domain	SUI1	Translation initiation factor SUI1	3	2	3	3	7	4	2	2	2	3
PF16622	Domain	zf-C2H2_11	zinc-finger C2H2-type	3	3	3	3	3	4	4	8	2	3
PF00044	Domain	Gp_dh_N	Glyceraldehyde 3-phosphate dehydrogenase, NAD binding domain	2	1	7	3	3	7	1	2	1	1
PF01290	Family	Thymosin	Thymosin beta-4 family	2	2	3	8	4	2	3	3	2	2
PF01773	Family	Nucleos_tra2_N	Na+ dependent nucleoside transporter N-terminus	2	2	2	2	2	2	2	2	8	2
PF07662	Family	Nucleos_tra2_C	Na+ dependent nucleoside transporter C-terminus	2	2	2	2	2	2	2	2	8	2
PF11357	Family	Spy1	Cell cycle regulatory protein	2	3	2	2	2	2	7	2	4	2
PF16497	Domain	MHC_I_3	MHC-I family domain	2	2	3	2	3	4	3	1	8	8
PF00832	Family	Ribosomal_L39	Ribosomal L39 protein	2	1	4	2	5	5	1	2	1	3
PF01230	Domain	HIT	HIT domain	2	1	2	3	7	2	2	2	2	2
PF04419	Family	4F5	4F5 protein family	2	2	2	6	7	2	2	2	1	2
PF05461	Family	ApoL	Apolipoprotein L	2	3	1	2	4	1	3	6	2	8
PF15300	Family	INT_SG_DDX_CT_C	INTS6/SAGE1/DDX26B/CT45 C-terminus	2	2	1	1	1	1	7	2	1	3	high number in H. sapiens
PF00666	Domain	Cathelicidins	Cathelicidin	1	2	2	1	2	2	1	1	3	6
PF00838	Domain	TCTP	Translationally controlled tumour protein	1	1	1	2	7	1	1	1	1	1
PF01176	Domain	eIF-1a	Translation initiation factor 1A / IF-1	1	1	1	1	2	1	2	6	1	2
PF01246	Family	Ribosomal_L24e	Ribosomal protein L24e	1	1	1	2	8	2	1	1	2	1	high number in Afrotherial species
PF06842	Family	DUF1242	Protein of unknown function (DUF1242)	1	1	1	6	1	2	1	1	1	1
PF10215	Family	Ost4	Oligosaccaryltransferase	1	1	3	3	8	5	1	1	1	1
PF15288	Domain	zf-CCHC_6	Zinc knuckle	1	1	2	1	1	1	6	1	2	2	high number in H. sapiens
PF00276	Family	Ribosomal_L23	Ribosomal protein L23	1	1	1	6	1	2	2	1	2	2	high number in Afrotherial species
PF00347	Domain	Ribosomal_L6	Ribosomal protein L6	1	1	1	1	6	1	1	1	1	1	high number in Afrotherial species
PF00410	Domain	Ribosomal_S8	Ribosomal protein S8	1	1	1	2	8	1	1	1	1	1	high number in Afrotherial species
PF01215	Domain	COX5B	Cytochrome c oxidase subunit Vb	1	1	1	1	7	1	1	1	1	1	high number in Afrotherial species
PF14915	Coiled-coil	CCDC144C	CCDC144C protein coiled-coil region	1	1	1	1	1	1	8	1	1	5
PF14987	Family	NADHdh_A3	NADH dehydrogenase 1 alpha subcomplex subunit 3	1	1	1	1	8	1	1	1	1	1	high number in Afrotherial species
PF00412	Domain	LIM	LIM domain	35	38	37	38	37	37	39	35	36	36
PF00307	Domain	CH	Calponin homology (CH) domain	33	38	36	36	37	35	37	34	36	36
PF13639	Domain	zf-RING_2	Ring finger domain	27	31	29	29	27	30	28	27	28	30
PF00628	Domain	PHD	PHD-finger	26	28	29	29	29	29	30	27	27	27
PF00105	Domain	zf-C4	Zinc finger, C4 type (two domains)	25	26	26	27	25	26	26	24	25	25
PF00130	Domain	C1_1	Phorbol esters/diacylglycerol binding domain (C1 domain)	25	28	28	27	25	25	28	26	27	27
PF00373	Domain	FERM_M	FERM central domain	25	25	26	26	24	27	27	23	25	25
PF00092	Domain	VWA	von Willebrand factor type A domain	24	24	24	24	24	26	27	26	26	26
PF00106	Domain	adh_short	short chain dehydrogenase	24	28	25	26	26	28	26	24	27	27
PF00226	Domain	DnaJ	DnaJ domain	24	26	25	26	27	25	26	24	26	25
PF02931	Family	Neur_chan_LBD	Neurotransmitter-gated ion-channel ligand binding domain	23	25	24	24	24	25	26	21	24	25
PF00004	Domain	AAA	ATPase family associated with various cellular activities (AAA)	22	25	25	25	24	23	25	22	24	23
PF00063	Domain	Myosin_head	Myosin head (motor domain)	20	21	23	20	20	21	22	19	21	20
PF00019	Domain	TGF_beta	Transforming growth factor beta like domain	20	21	22	20	20	19	22	18	20	19
PF00102	Domain	Y_phosphatase	Protein-tyrosine phosphatase	20	22	22	21	20	22	20	19	22	20
PF00439	Domain	Bromodomain	Bromodomain	19	22	21	20	19	21	20	19	19	18
PF02210	Domain	Laminin_G_2	Laminin G domain	19	19	20	16	18	19	21	17	18	18
PF14670	Domain	FXa_inhibition	Coagulation Factor Xa inhibitory site	19	20	21	20	18	20	20	21	19	19
PF00013	Domain	KH_1	KH domain	18	20	20	20	20	19	20	17	19	18
PF00615	Domain	RGS	Regulator of G protein signaling domain	18	20	20	18	19	20	20	17	19	19
PF00397	Domain	WW	WW domain	18	22	21	20	21	22	21	20	20	20
PF00856	Family	SET	SET domain	18	19	18	19	18	20	18	16	17	17
PF00176	Family	SNF2_N	SNF2 family N-terminal domain	17	19	18	18	17	18	18	16	17	16
PF13923	Domain	zf-C3HC4_2	Zinc finger, C3HC4 type (RING finger)	17	18	17	19	17	19	18	16	16	15
PF00386	Domain	C1q	C1q domain	17	18	18	18	16	17	18	15	17	18
PF00531	Domain	Death	Death domain	17	18	18	18	17	17	17	16	18	16
PF00788	Domain	RA	Ras association (RalGDS/AF-6) domain	17	18	17	19	18	19	19	17	17	17
PF00027	Domain	cNMP_binding	Cyclic nucleotide-binding domain	16	18	17	16	16	17	17	15	16	17
PF01403	Family	Sema	Sema domain	16	18	18	17	17	18	17	16	17	16
PF07525	Domain	SOCS_box	SOCS box	16	19	20	18	18	19	21	17	18	17
PF00025	Domain	Arf	ADP-ribosylation factor family	16	17	17	17	19	16	16	15	16	16
PF00053	Domain	Laminin_EGF	Laminin EGF domain	16	17	17	15	16	16	15	13	14	15
PF00134	Domain	Cyclin_N	Cyclin, N-terminal domain	15	18	17	16	16	18	18	15	17	17
PF00632	Domain	HECT	HECT-domain (ubiquitin-transferase)	15	17	16	16	15	17	16	14	15	15
PF01363	Domain	FYVE	FYVE zinc finger	15	17	16	16	15	16	16	15	17	16
PF00083	Family	Sugar_tr	Sugar (and other) transporter	15	17	17	14	14	15	17	18	17	16
PF00085	Domain	Thioredoxin	Thioredoxin	15	17	17	16	17	17	16	15	17	16
PF00093	Family	VWC	von Willebrand factor type C domain	15	15	15	14	14	16	15	13	13	13
PF00642	Family	zf-CCCH	Zinc finger C-x8-C-x5-C-x3-H type (and similar)	15	17	17	17	19	16	17	15	15	15
PF09379	Domain	FERM_N	FERM N-terminal domain	15	14	16	15	14	16	16	14	14	15
PF00433	Family	Pkinase_C	Protein kinase C terminal domain	14	15	14	14	13	14	14	12	12	13
PF09380	Domain	FERM_C	FERM C-terminal PH-like domain	14	13	15	14	13	14	15	13	14	14
PF13246	Family	Cation_ATPase	Cation transport ATPase (P-type)	14	17	14	15	14	15	15	13	14	14
PF00149	Domain	Metallophos	Calcineurin-like phosphoesterase	13	16	16	15	17	16	16	15	16	15
PF00170	Family	bZIP_1	bZIP transcription factor	13	16	16	17	16	16	15	14	14	14
PF00178	Domain	Ets	Ets-domain	13	17	17	16	16	17	16	14	16	15
PF00147	Domain	Fibrinogen_C	Fibrinogen beta and gamma chains, C-terminal globular domain	13	14	13	13	12	13	14	11	13	12
PF00514	Repeat	Arm	Armadillo/beta-catenin-like repeat	13	15	16	15	15	16	16	14	14	15
PF00640	Domain	PID	Phosphotyrosine interaction domain (PTB/PID)	13	14	14	14	13	13	14	13	13	14
PF12662	Domain	cEGF	Complement Clr-like EGF-like	13	13	11	14	13	14	14	11	12	12
PF00045	Repeat	Hemopexin	Hemopexin	12	14	13	12	16	15	13	12	12	12
PF00498	Family	FHA	FHA domain	12	13	13	16	14	15	15	14	14	14
PF00581	Domain	Rhodanese	Rhodanese-like domain	12	14	13	13	13	12	12	11	12	12
PF01462	Family	LRRNT	Leucine rich repeat N-terminal domain	12	15	14	15	15	14	14	13	13	14
PF01529	Family	DHHC	DHHC palmitoyltransferase	12	13	14	14	13	14	14	12	14	12
PF02373	Domain	JmjC	JmjC domain, hydroxylase	12	11	11	12	10	11	13	12	12	12
PF02932	Family	Neur_chan_memb	Neurotransmitter-gated ion-channel transmembrane region	12	14	13	12	13	13	15	11	12	13
PF03372	Domain	Exo_endo_phos	Endonuclease/Exonuclease/phosphatase family	12	15	13	13	13	14	14	12	13	15
PF00029	Family	Connexin	Connexin	12	12	11	10	13	10	12	10	11	11
PF00091	Domain	Tubulin	Tubulin/FtsZ family, GTPase domain	12	12	11	12	13	11	14	10	12	13
PF00211	Domain	Guanylate_cyc	Adenylate and Guanylate cyclase catalytic domain	12	14	11	11	12	12	10	11	12	11
PF00249	Domain	Myb_DNA-binding	Myb-like DNA-binding domain	12	14	15	12	12	13	14	12	12	12
PF00435	Domain	Spectrin	Spectrin repeat	12	14	14	12	13	13	13	12	12	11
PF05986	Family	ADAM_spacer1	ADAM-TS Spacer 1	12	14	13	14	13	13	12	12	13	12
PF00171	Family	Aldedh	Aldehyde dehydrogenase family	11	9	9	9	13	10	10	10	10	10
PF00246	Domain	Peptidase_M14	Zinc carboxypeptidase	11	12	11	12	10	12	11	9	11	10
PF00413	Domain	Peptidase_M10	Matrixin	11	13	13	12	16	14	13	12	12	11
PF00535	Family	Glycos_transf_2	Glycosyl transferase family 2	11	14	14	13	14	14	14	12	13	13
PF00652	Domain	Ricin_B_lectin	Ricin-type beta-trefoil lectin domain	11	11	13	12	12	13	12	11	11	12
PF00855	Domain	PWWP	PWWP domain	11	13	13	12	13	13	11	11	12	12
PF01412	Domain	ArfGap	Putative GTPase activating protein for Arf	11	12	11	12	11	11	16	12	12	12
PF01582	Family	TIR	TIR domain	11	12	11	11	11	12	11	10	12	10
PF02793	Family	HRM	Hormone receptor domain	11	12	11	11	10	11	12	11	12	11
PF03953	Domain	Tubulin_C	Tubulin C-terminal domain	11	11	11	11	12	10	12	10	12	13
PF00167	Domain	FGF	Fibroblast growth factor	11	13	13	12	12	13	12	11	11	12
PF00233	Domain	PDEase_I	3'5'-cyclic nucleotide phosphodiesterase	11	12	12	12	12	13	12	11	11	11
PF00385	Domain	Chromo	Chromo (CHRromatin Organisation MOdifier) domain	11	12	10	13	12	13	15	11	12	12
PF00610	Domain	DEP	Domain found in Dishevelled, Egl-10, and Pleckstrin (DEP)	11	12	11	11	11	13	12	11	12	11
PF00754	Domain	F5_F8_type_C	F5/8 type C domain	11	12	12	11	11	12	14	11	11	11
PF00777	Family	Glyco_transf_29	Glycosyltransferase family 29 (sialyltransferase)	11	12	12	11	10	12	11	10	14	11
PF01390	Family	SEA	SEA domain	11	14	13	11	13	12	11	11	14	13
PF01471	Domain	PG_binding_1	Putative peptidoglycan binding domain	11	11	9	10	9	10	11	11	10	10
PF07885	Family	Ion_trans_2	Ion channel	11	12	12	12	12	13	12	11	12	12
PF00009	Domain	GTP_EFTU	Elongation factor Tu GTP binding domain	10	12	12	12	10	11	11	10	11	10
PF00227	Domain	Proteasome	Proteasome subunit	10	11	11	14	13	11	11	10	10	10
PF00293	Domain	NUDIX	NUDIX domain	10	11	9	10	9	10	12	11	10	9
PF00415	Repeat	RCC1	Regulator of chromosome condensation (RCC1) repeat	10	12	11	11	11	12	11	10	11	11
PF01392	Domain	Fz	Fz domain	10	14	13	12	12	11	13	12	12	12
PF01437	Family	PSI	Plexin repeat	10	13	14	12	11	13	13	11	11	11
PF01477	Domain	PLAT	PLAT/LH2 domain	10	12	10	11	12	11	12	11	11	12
PF00020	Domain	TNFR_c6	TNFR/NGFR cysteine-rich region	10	9	9	9	8	8	10	10	12	12
PF00209	Family	SNF	Sodium:neurotransmitter symporter family	10	12	11	11	12	12	11	11	11	11
PF00481	Family	PP2C	Protein phosphatase 2C	10	11	10	10	10	10	11	9	10	10
PF00515	Repeat	TPR_1	Tetratricopeptide repeat	10	10	11	10	8	10	11	11	11	10
PF00611	Family	FCH	Fes/CIP4, and EFC/F-BAR homology domain	10	11	10	10	9	9	12	10	11	10
PF00625	Domain	Guanylate_kin	Guanylate kinase	10	11	10	11	9	12	11	10	10	10
PF00629	Domain	MAM	MAM domain, meprin/A5/mu	10	11	9	10	9	10	10	9	9	10
PF00688	Family	TGFb_propeptide	TGF-beta propeptide	10	11	10	11	10	9	11	10	11	11
PF01833	Domain	TIG	IPT/TIG domain	10	12	12	11	11	11	11	10	11	10
PF01839	Repeat	FG-GAP	FG-GAP repeat	10	10	10	10	10	11	11	9	10	10
PF02759	Family	RUN	RUN domain	10	11	10	11	10	12	11	10	10	10
PF04408	Domain	HA2	Helicase associated domain (HA2)	10	11	10	10	10	10	10	9	10	9
PF08441	Family	Integrin_alpha2	Integrin alpha	10	9	9	10	9	8	10	9	10	10
PF00036	Domain	EF-hand_1	EF hand	9	9	9	10	11	7	8	8	8	8
PF00086	Domain	Thyroglobulin_1	Thyroglobulin type-1 repeat	9	10	10	10	9	10	10	9	9	8
PF00110	Family	wnt	wnt family	9	11	11	11	10	11	11	10	10	10
PF00689	Family	Cation_ATPase_C	Cation transporting ATPase, C-terminus	9	9	8	10	9	10	9	8	8	8
PF01490	Family	Aa_trans	Transmembrane amino acid transporter protein	9	10	9	9	9	10	10	9	10	9
PF01553	Family	Acyltransferase	Acyltransferase	9	10	10	10	10	10	9	9	9	9
PF01585	Family	G-patch	G-patch domain	9	12	11	11	12	11	12	10	11	11
PF01753	Family	zf-MYND	MYND finger	9	11	10	11	11	10	11	10	10	10
PF01762	Family	Galactosyl_T	Galactosyltransferase	9	9	10	8	10	10	9	8	9	9
PF02225	Family	PA	PA domain	9	11	10	10	9	8	11	9	11	9
PF02893	Domain	GRAM	GRAM domain	9	9	10	10	9	10	10	9	10	9
PF07717	Domain	OB_NTP_bind	Oligonucleotide/oligosaccharide-binding (OB)-fold	9	10	9	10	10	8	10	9	9	9
PF00035	Domain	dsrm	Double-stranded RNA binding motif	9	9	9	10	9	10	9	8	9	9
PF00060	Family	Lig_chan	Ligand-gated ion channel	9	10	10	10	10	11	10	9	10	10
PF00094	Family	VWD	von Willebrand factor type D domain	9	9	11	10	8	10	10	9	12	10
PF00107	Family	ADH_zinc_N	Zinc-binding dehydrogenase	9	7	7	6	9	7	9	8	10	8
PF00219	Domain	IGFBP	Insulin-like growth factor binding protein	9	9	9	11	9	10	11	10	10	10
PF00454	Family	PI3_PI4_kinase	Phosphatidylinositol 3- and 4-kinase	9	10	9	9	9	10	9	8	9	9
PF00690	Domain	Cation_ATPase_N	Cation transporter/ATPase, N-terminus	9	10	10	10	8	11	10	9	10	10
PF00884	Family	Sulfatase	Sulfatase	9	8	7	10	10	8	10	6	10	9
PF00907	Domain	T-box	T-box	9	10	10	10	9	10	10	9	9	9
PF01576	Coiled-coil	Myosin_tail_1	Myosin tail	9	8	9	7	7	8	9	8	8	8
PF01759	Domain	NTR	UNC-6/NTR/C345C module	9	9	9	10	9	9	11	9	9	10
PF03144	Domain	GTP_EFTU_D2	Elongation factor Tu domain 2	9	9	7	8	6	8	8	7	8	7
PF10613	Domain	Lig_chan-Glu_bd	Ligated ion channel L-glutamate- and glycine-binding site	9	11	9	10	10	10	10	9	10	10
PF13909	Domain	zf-H2C2_5	C2H2-type zinc-finger domain	9	9	10	9	8	10	10	8	11	9
PF00055	Family	Laminin_N	Laminin N-terminal (Domain VI)	8	10	9	9	9	8	9	8	9	9
PF00074	Domain	RnaseA	Pancreatic ribonuclease	8	7	7	6	7	7	9	10	6	10
PF00100	Family	Zona_pellucida	Zona pellucida-like domain	8	9	8	7	9	8	9	8	9	8
PF00112	Domain	Peptidase_C1	Papain family cysteine protease	8	8	8	8	7	7	7	12	8	7
PF00254	Domain	FKBP_C	FKBP-type peptidyl-prolyl cis-trans isomerase	8	9	9	9	9	10	9	8	9	8
PF00387	Family	PI-PLC-Y	Phosphatidylinositol-specific phospholipase C, Y domain	8	9	9	9	8	9	9	8	9	8
PF00561	Domain	Abhydrolase_1	alpha/beta hydrolase fold	8	9	6	7	7	7	6	6	9	8
PF00569	Domain	ZZ	Zinc finger, ZZ type	8	9	9	9	10	10	9	8	9	9
PF00641	Domain	zf-RanBP	Zn-finger in Ran binding protein and others	8	9	10	9	8	9	9	8	10	8
PF00999	Family	Na_H_Exchanger	Sodium/hydrogen exchanger family	8	9	8	8	7	8	8	7	8	8
PF01369	Domain	Sec7	Sec7 domain	8	9	9	9	9	9	9	8	8	8
PF01399	Domain	PCI	PCI domain	8	9	9	10	9	10	10	8	9	9
PF02141	Family	DENN	DENN (AEX-3) domain	8	9	9	9	8	10	10	8	8	9
PF02770	Domain	Acyl-CoA_dh_M	Acyl-CoA dehydrogenase, middle domain	8	8	6	7	8	8	9	8	8	8
PF02984	Domain	Cyclin_C	Cyclin, C-terminal domain	8	9	9	7	9	10	10	8	9	8
PF03028	Domain	Dynein_heavy	Dynein heavy chain region D6 P-loop domain	8	9	9	9	8	10	9	9	9	8
PF03456	Domain	uDENN	uDENN domain	8	9	9	9	8	9	9	8	9	8
PF03798	Domain	TRAM_LAG1_CLN8	TLC domain	8	10	9	9	10	9	9	8	8	9
PF08393	Family	DHC_N2	Dynein heavy chain, N-terminal region 2	8	9	9	9	8	10	9	9	9	8
PF12171	Family	zf-C2H2_jaz	Zinc-finger double-stranded RNA-binding	8	7	7	8	8	7	9	7	10	9
PF12698	Family	ABC2_membrane_3	ABC-2 family transporter protein	8	9	9	9	7	8	7	8	8	7
PF14580	Repeat	LRR_9	Leucine-rich repeat	8	11	11	11	10	13	11	10	13	11
PF00012	Family	HSP70	Hsp70 protein	8	9	8	7	8	6	8	7	8	7
PF00023	Repeat	Ank	Ankyrin repeat	8	7	7	6	6	8	8	6	8	5
PF00030	Domain	Crystall	Beta/Gamma crystallin	8	9	8	5	8	8	9	9	8	9
PF00051	Domain	Kringle	Kringle domain	8	9	9	9	8	8	10	8	8	8
PF00098	Domain	zf-CCHC	Zinc knuckle	8	8	7	9	8	8	10	9	8	8
PF00378	Domain	ECH_1	Enoyl-CoA hydratase/isomerase	8	6	7	7	7	7	9	7	6	5
PF00626	Domain	Gelsolin	Gelsolin repeat	8	8	7	7	8	8	7	7	7	7
PF00644	Family	PARP	Poly(ADP-ribose) polymerase catalytic domain	8	9	7	7	8	7	8	7	8	7
PF00650	Domain	CRAL_TRIO	CRAL/TRIO domain	8	7	7	9	7	7	9	7	8	9
PF01007	Family	IRK	Inward rectifier potassium channel transmembrane domain	8	9	9	9	8	8	9	8	9	8
PF01217	Domain	Clat_adaptor_s	Clathrin adaptor complex small chain	8	9	9	9	8	9	8	8	8	9
PF01485	Domain	IBR	IBR domain, a half RING-finger domain	8	8	7	8	7	8	7	7	6	6
PF01852	Domain	START	START domain	8	8	7	9	8	8	9	7	9	9
PF02181	Family	FH2	Formin Homology 2 Domain	8	9	9	9	8	8	9	8	8	8
PF02191	Family	OLF	Olfactomedin-like domain	8	8	7	8	8	8	7	7	7	6
PF03114	Domain	BAR	BAR domain	8	9	8	9	8	9	7	7	8	8
PF03184	Family	DDE_1	DDE superfamily endonuclease	8	8	6	6	7	7	6	4	8	8
PF03810	Domain	IBN_N	Importin-beta N-terminal domain	8	9	9	8	8	7	9	8	9	8
PF05920	Family	Homeobox_KN	Homeobox KN domain	8	9	9	9	8	8	10	8	9	8
PF08742	Domain	C8	C8 domain	8	7	8	7	6	7	7	7	10	8
PF12775	Family	AAA_7	P-loop containing dynein motor region	8	9	9	9	8	10	9	9	9	9
PF12874	Domain	zf-met	Zinc-finger of C2H2 type	8	9	8	11	9	10	8	7	7	7
PF16209	Family	PhoLip_ATPase_N	Phospholipid-translocating ATPase N-terminal	8	9	8	9	7	8	8	7	8	9
PF00007	Domain	Cys_knot	Cystine-knot domain	7	6	6	7	7	7	9	4	6	6
PF00058	Repeat	Ldl_recept_b	Low-density lipoprotein receptor repeat class B	7	8	7	7	7	8	8	7	8	8
PF00320	Domain	GATA	GATA zinc finger	7	8	8	7	8	8	8	7	8	7
PF00474	Family	SSF	Sodium:solute symporter family	7	8	8	7	8	8	7	7	7	7
PF00564	Domain	PB1	PB1 domain	7	8	7	7	7	8	7	7	8	8
PF00567	Domain	TUDOR	Tudor domain	7	7	6	6	6	6	7	6	7	6
PF00656	Domain	Peptidase_C14	Caspase domain	7	9	7	8	8	8	7	6	9	7
PF00735	Domain	Septin	Septin	7	6	7	7	7	9	7	7	7	7
PF00781	Family	DAGK_cat	Diacylglycerol kinase catalytic domain	7	8	9	8	8	9	9	8	8	8
PF01108	Family	Tissue_fac	Tissue factor	7	6	6	7	7	7	7	6	6	6
PF01404	Domain	Ephrin_lbd	Ephrin receptor ligand binding domain	7	8	8	7	8	8	8	7	9	8
PF01926	Family	MMR_HSR1	50S ribosome-binding GTPase	7	6	6	6	8	6	7	6	6	6
PF02037	Family	SAP	SAP domain	7	9	9	9	9	10	10	8	9	9
PF02148	Domain	zf-UBP	Zn-finger in ubiquitin-hydrolases and other protein	7	9	8	9	8	8	8	7	8	7
PF02205	Family	WH2	WH2 motif	7	8	6	7	7	7	7	7	6	7
PF02338	Family	OTU	OTU-like cysteine protease	7	8	7	7	6	8	7	6	6	7
PF03826	Domain	OAR	OAR domain	7	9	9	9	8	7	9	7	8	8
PF05287	Family	PMG	PMG protein	7	4	6	4	4	4	5	6	6	5
PF06602	Domain	Myotub-related	Myotubularin-like phosphatase domain	7	8	7	7	7	7	7	6	8	8
PF12780	Domain	AAA_8	P-loop containing dynein motor region D4	7	8	8	9	8	9	9	9	9	9
PF12781	Domain	AAA_9	ATP-binding dynein motor region	7	9	9	8	8	9	9	9	8	8
PF16212	Family	PhoLip_ATPase_C	Phospholipid-translocating P-type ATPase C-terminal	7	9	9	9	8	8	8	7	8	9
PF00040	Domain	fn2	Fibronectin type II domain	6	8	7	7	7	8	8	7	10	10
PF00054	Domain	Laminin_G_1	Laminin G domain	6	6	6	6	5	6	7	6	5	7
PF00157	Domain	Pou	Pou domain - N-terminal to homeobox domain	6	8	7	8	8	7	9	8	8	8
PF00175	Domain	NAD_binding_1	Oxidoreductase NAD-binding domain	6	7	7	7	6	7	7	6	6	6
PF00188	Domain	CAP	Cysteine-rich secretory protein family	6	8	7	7	6	7	9	8	8	7
PF00230	Family	MIP	Major intrinsic protein	6	6	7	7	7	7	9	6	7	7
PF00350	Domain	Dynamin_N	Dynamin family	6	8	9	9	8	8	9	7	8	8
PF00354	Domain	Pentaxin	Pentaxin family	6	6	5	5	6	7	6	6	6	5
PF00538	Domain	Linker_histone	linker histone H1 and H5 family	6	8	8	7	7	7	6	7	8	9
PF00594	Domain	Gla	Vitamin K-dependent carboxylation/gamma-carboxyglutamic (GLA) domain	6	6	5	6	5	6	7	6	7	6
PF01237	Family	Oxysterol_BP	Oxysterol-binding protein	6	6	6	7	7	7	7	6	6	6
PF01388	Domain	ARID	ARID/BRIGHT DNA binding domain	6	8	9	8	7	7	9	8	8	8
PF01433	Domain	Peptidase_M1	Peptidase family M1 domain	6	7	7	6	7	7	7	6	8	6
PF01448	Family	ELM2	ELM2 domain	6	8	8	7	8	7	7	7	7	6
PF02136	Domain	NTF2	Nuclear transport factor 2 (NTF2) domain	6	6	6	7	4	7	5	5	5	5
PF02493	Repeat	MORN	MORN repeat	6	7	9	7	9	8	9	7	8	8
PF02535	Family	Zip	ZIP Zinc transporter	6	8	7	7	7	8	7	7	6	7
PF03221	Domain	HTH_Tnp_Tc5	Tc5 transposase DNA-binding domain	6	9	7	7	7	7	8	5	9	8
PF03357	Family	Snf7	Snf7	6	7	6	7	7	7	6	6	6	6
PF03567	Domain	Sulfotransfer_2	Sulfotransferase family	6	7	7	7	7	7	7	6	6	6
PF08240	Domain	ADH_N	Alcohol dehydrogenase GroES-like domain	6	4	3	3	5	4	5	5	6	5
PF08447	Domain	PAS_3	PAS fold	6	8	7	6	7	7	7	6	5	5
PF08736	Family	FA	FERM adjacent (FA)	6	8	7	7	7	8	7	7	8	7
PF12894	Repeat	ANAPC4_WD40	Anaphase-promoting complex subunit 4 WD40 domain	6	8	6	6	7	8	8	6	8	6
PF13087	Domain	AAA_12	AAA domain	6	7	6	6	5	7	6	6	6	5
PF13516	Repeat	LRR_6	Leucine Rich repeat	6	8	8	7	5	4	7	8	5	5
PF13716	Domain	CRAL_TRIO_2	Divergent CRAL/TRIO domain	6	7	6	7	7	8	7	6	6	6
PF14497	Domain	GST_C_3	Glutathione S-transferase, C-terminal domain	6	4	5	6	8	5	5	5	8	8
PF14575	Domain	EphA2_TM	Ephrin type-A receptor 2 transmembrane domain	6	8	8	8	8	8	8	7	8	7
PF16489	Domain	GAIN	GPCR-Autoproteolysis INducing (GAIN) domain	6	6	7	6	6	7	6	6	5	6
PF16746	Domain	BAR_3	BAR domain of APPL family	6	7	7	7	6	7	7	6	6	6
PF00042	Domain	Globin	Globin	6	5	6	5	5	5	7	8	5	9
PF00068	Domain	Phospholip_A2_1	Phospholipase A2	6	6	5	5	6	5	6	4	5	7
PF00173	Domain	Cyt-b5	Cytochrome b5-like Heme/Steroid binding domain	6	9	8	9	7	8	7	8	8	8
PF00191	Family	Annexin	Annexin	6	6	7	7	8	7	7	7	6	6
PF00571	Domain	CBS	CBS domain	6	6	6	6	5	7	8	7	6	6
PF00648	Family	Peptidase_C2	Calpain family cysteine protease	6	8	8	8	8	8	8	7	8	7
PF00789	Domain	UBX	UBX domain	6	8	7	7	7	8	6	7	6	7
PF00791	Family	ZU5	ZU5 domain	6	7	7	6	7	7	7	6	6	6
PF00993	Domain	MHC_II_alpha	Class II histocompatibility antigen, alpha domain	6	4	5	2	3	3	3	2	3	4
PF01424	Domain	R3H	R3H domain	6	6	6	6	5	5	6	6	5	5
PF02008	Domain	zf-CXXC	CXXC zinc finger domain	6	6	6	7	8	7	7	6	6	6
PF02174	Domain	IRS	PTB domain (IRS-1 type)	6	8	7	7	6	6	7	7	7	7
PF02198	Domain	SAM_PNT	Sterile alpha motif (SAM)/Pointed domain	6	6	6	6	7	7	6	5	6	5
PF04969	Domain	CS	CS domain	6	6	7	7	8	7	7	6	8	6
PF05739	Family	SNARE	SNARE domain	6	8	6	7	6	7	6	6	6	6
PF07677	Domain	A2M_recep	A-macroglobulin receptor binding domain	6	6	5	6	5	5	6	5	6	6
PF07716	Family	bZIP_2	Basic region leucine zipper	6	6	6	6	4	7	7	6	6	6
PF07728	Domain	AAA_5	AAA domain (dynein-related subfamily)	6	8	8	7	8	8	7	7	8	8
PF07992	Domain	Pyr_redox_2	Pyridine nucleotide-disulphide oxidoreductase	6	6	6	6	5	7	6	5	6	6
PF08686	Domain	PLAC	PLAC (protease and lacunin) domain	6	6	7	7	7	6	7	6	6	5
PF09162	Domain	Tap-RNA_bind	Tap, RNA-binding	6	4	2	2	1	4	3	2	3	3
PF12947	Domain	EGF_3	EGF domain	6	6	6	7	4	5	7	6	5	6
PF13426	Domain	PAS_9	PAS domain	6	6	6	7	6	7	6	6	6	5
PF00151	Domain	Lipase	Lipase	5	6	6	6	5	5	6	5	5	5
PF00300	Domain	His_Phos_1	Histidine phosphatase superfamily (branch 1)	5	6	6	5	6	7	7	6	6	6
PF00554	Domain	RHD_DNA_bind	Rel homology DNA-binding domain	5	6	6	6	5	6	6	5	5	5
PF00568	Domain	WH1	WH1 domain	5	6	6	6	5	7	6	5	5	6
PF00616	Family	RasGAP	GTPase-activator protein for Ras-like GTPase	5	6	6	6	6	6	7	5	6	7
PF00646	Domain	F-box	F-box domain	5	7	7	7	7	6	7	7	7	8
PF00899	Domain	ThiF	ThiF family	5	5	6	6	5	5	6	6	5	5
PF00928	Family	Adap_comp_sub	Adaptor complexes medium subunit family	5	6	6	6	5	6	6	5	5	6
PF01067	Domain	Calpain_III	Calpain large subunit, domain III	5	7	7	7	7	7	7	6	7	6
PF01145	Family	Band_7	SPFH domain / Band 7 family	5	6	7	6	6	7	6	6	6	5
PF01302	Domain	CAP_GLY	CAP-Gly domain	5	6	6	6	5	5	6	5	5	5
PF01826	Domain	TIL	Trypsin Inhibitor like cysteine rich domain	5	7	8	7	6	7	7	7	9	8
PF01835	Domain	MG2	MG2 domain	5	5	6	6	6	5	6	6	5	5
PF02145	Family	Rap_GAP	Rap/ran-GAP	5	5	6	6	5	6	6	5	5	5
PF02319	Domain	E2F_TDP	E2F/DP family winged-helix DNA-binding domain	5	6	6	6	5	5	6	5	6	5
PF02485	Family	Branch	Core-2/I-Branching enzyme	5	6	6	5	4	6	4	4	4	5
PF02518	Domain	HATPase_c	Histidine kinase-, DNA gyrase B-, and HSP90-like ATPase	5	7	5	7	8	7	6	5	5	5
PF02771	Domain	Acyl-CoA_dh_N	Acyl-CoA dehydrogenase, N-terminal domain	5	6	5	6	6	7	6	6	5	6
PF02828	Domain	L27	L27 domain	5	6	6	5	5	6	6	5	5	5
PF03006	Family	HlyIII	Haemolysin-III related	5	6	6	7	6	7	6	6	6	6
PF03137	Family	OATP	Organic Anion Transporter Polypeptide (OATP) family	5	4	6	6	6	6	7	9	5	5
PF03165	Domain	MH1	MH1 domain	5	7	7	6	7	5	7	6	6	6
PF03455	Domain	dDENN	dDENN domain	5	6	7	7	7	7	7	6	6	6
PF05485	Domain	THAP	THAP domain	5	6	5	6	3	5	7	4	6	6
PF06512	Family	Na_trans_assoc	Sodium ion transport-associated	5	5	6	6	5	6	6	5	5	5
PF09011	Domain	HMG_box_2	HMG-box domain	5	5	5	6	9	4	5	5	4	5
PF09279	Domain	EF-hand_like	Phosphoinositide-specific phospholipase C, efhand-like	5	5	5	7	7	7	6	5	6	6
PF09294	Domain	Interfer-bind	Interferon-alpha/beta receptor, fibronectin type III	5	5	5	5	5	6	5	6	4	5
PF12480	Family	DUF3699	Protein of unknown function (DUF3699)	5	6	5	5	6	4	5	4	5	5
PF12763	Family	EF-hand_4	Cytoskeletal-regulatory complex EF hand	5	6	6	6	5	5	6	5	5	5
PF12799	Repeat	LRR_4	Leucine Rich repeats (2 copies)	5	6	6	6	4	5	6	8	5	7
PF13405	Domain	EF-hand_6	EF-hand domain	5	6	7	7	9	7	7	6	8	7
PF13417	Domain	GST_N_3	Glutathione S-transferase, N-terminal domain	5	6	5	7	6	5	6	5	6	6
PF13418	Repeat	Kelch_4	Galactose oxidase, central domain	5	5	4	5	4	5	4	4	5	4
PF13561	Domain	adh_short_C2	Enoyl-(Acyl carrier protein) reductase	5	5	5	5	7	5	5	5	6	6
PF13646	Family	HEAT_2	HEAT repeats	5	6	6	7	5	7	6	6	6	6
PF13771	Domain	zf-HC5HC2H	PHD-like zinc-binding domain	5	6	5	6	5	5	6	8	5	5
PF13964	Repeat	Kelch_6	Kelch motif	5	6	7	6	5	6	6	6	9	8
PF14555	Domain	UBA_4	UBA-like domain	5	6	6	6	5	5	6	5	5	5
PF15410	Domain	PH_9	Pleckstrin homology domain	5	6	6	6	6	6	6	5	5	5
PF16179	Domain	RHD_dimer	Rel homology dimerisation domain	5	6	6	6	5	6	6	5	5	5
PF00011	Family	HSP20	Hsp20/alpha crystallin family	5	6	6	6	5	5	6	5	5	5
PF00049	Domain	Insulin	Insulin/IGF/Relaxin family	5	4	5	4	3	3	5	4	4	3
PF00082	Domain	Peptidase_S8	Subtilase family	5	6	6	6	5	6	6	5	5	5
PF00241	Domain	Cofilin_ADF	Cofilin/tropomyosin-type actin-binding protein	5	6	6	6	5	5	6	6	6	5
PF00340	Domain	IL1	Interleukin-1 / 18	5	5	5	4	4	5	5	5	7	5
PF00605	Domain	IRF	Interferon regulatory factor transcription factor	5	6	6	6	5	6	5	5	5	5
PF00929	Family	RNase_T	Exonuclease	5	6	5	6	6	5	6	5	6	6
PF01105	Domain	EMP24_GP25L	emp24/gp25L/p24 family/GOLD	5	6	6	5	5	6	6	6	6	5
PF01694	Family	Rhomboid	Rhomboid family	5	5	5	5	5	4	4	4	4	5
PF01734	Family	Patatin	Patatin-like phospholipase	5	4	3	7	4	4	5	4	4	4
PF01794	Family	Ferric_reduct	Ferric reductase like transmembrane component	5	5	5	5	4	5	7	5	6	6
PF02318	Family	FYVE_2	FYVE-type zinc finger	5	5	5	5	4	4	5	6	4	4
PF02375	Family	JmjN	jmjN domain	5	5	6	6	4	5	6	5	5	5
PF03062	Family	MBOAT	MBOAT, membrane-bound O-acyltransferase family	5	6	6	6	6	7	6	6	5	5
PF04089	Domain	BRICHOS	BRICHOS domain	5	6	5	6	4	6	5	5	6	5
PF04970	Domain	LRAT	Lecithin retinol acyltransferase	5	4	5	4	5	3	4	3	5	5
PF07258	Domain	COMM_domain	COMM domain	5	5	7	6	5	6	6	5	5	5
PF08210	Domain	APOBEC_N	APOBEC-like N-terminal domain	5	5	4	3	5	4	7	3	5	4
PF08711	Domain	Med26	TFIIS helical bundle-like domain	5	5	5	6	7	5	8	5	5	6
PF10294	Family	Methyltransf_16	Lysine methyltransferase	5	4	5	6	4	5	6	5	4	5
PF13432	Family	TPR_16	Tetratricopeptide repeat	5	6	7	6	7	6	6	5	7	5
PF13589	Domain	HATPase_c_3	Histidine kinase-, DNA gyrase B-, and HSP90-like ATPase	5	6	5	4	5	5	6	5	5	5
PF13620	Domain	CarboxypepD_reg	Carboxypeptidase regulatory-like domain	5	5	5	5	4	5	7	5	5	5
PF13640	Domain	2OG-FeII_Oxy_3	2OG-Fe(II) oxygenase superfamily	5	6	6	6	6	6	5	6	5	5
PF13768	Domain	VWA_3	von Willebrand factor type A domain	5	5	5	4	4	4	4	5	5	5
PF13903	Family	Claudin_2	PMP-22/EMP/MP20/Claudin tight junction	5	5	6	5	5	4	5	8	6	4
PF14893	Family	PNMA	PNMA	5	5	5	5	4	5	6	3	6	4
PF00056	Family	Ldh_1_N	lactate/malate dehydrogenase, NAD binding domain	4	4	3	4	4	5	5	4	4	4
PF00334	Domain	NDK	Nucleoside diphosphate kinase	4	5	6	8	7	8	5	5	5	5
PF00447	Domain	HSF_DNA-bind	HSF-type DNA-binding	4	2	3	3	3	3	6	3	6	5
PF00452	Family	Bcl-2	Apoptosis regulator proteins, Bcl-2 family	4	5	5	6	5	7	6	7	5	6
PF00462	Domain	Glutaredoxin	Glutaredoxin	4	4	4	4	3	3	4	3	3	3
PF00487	Domain	FA_desaturase	Fatty acid desaturase	4	5	4	5	5	4	4	6	5	5
PF00493	Domain	MCM	MCM P-loop domain	4	5	4	5	4	5	5	4	4	4
PF00609	Family	DAGK_acc	Diacylglycerol kinase accessory domain	4	5	6	6	4	6	6	5	5	5
PF00654	Family	Voltage_CLC	Voltage gated chloride channel	4	5	5	5	4	5	5	5	4	4
PF00779	Motif	BTK	BTK motif	4	5	5	5	4	5	5	4	4	4
PF00784	Family	MyTH4	MyTH4 domain	4	5	5	6	5	5	5	4	5	4
PF00927	Domain	Transglut_C	Transglutaminase family, C-terminal ig like domain	4	4	5	5	5	5	5	5	4	4
PF01150	Family	GDA1_CD39	GDA1/CD39 (nucleoside phosphatase) family	4	5	5	5	3	5	5	5	4	4
PF01336	Domain	tRNA_anti-codon	OB-fold nucleic acid binding domain	4	5	4	6	5	5	5	4	4	4
PF01428	Family	zf-AN1	AN1-like Zinc finger	4	5	5	4	5	5	5	4	4	4
PF01504	Family	PIP5K	Phosphatidylinositol-4-phosphate 5-Kinase	4	4	5	5	4	5	5	4	5	4
PF01532	Domain	Glyco_hydro_47	Glycosyl hydrolase family 47	4	4	5	5	4	5	5	4	4	5
PF01661	Domain	Macro	Macro domain	4	5	4	4	7	5	5	4	5	4
PF01663	Family	Phosphodiest	Type I phosphodiesterase / nucleotide pyrophosphatase	4	5	4	5	4	5	4	4	5	4
PF02170	Domain	PAZ	PAZ domain	4	4	5	5	4	5	5	4	5	5
PF02244	Domain	Propep_M14	Carboxypeptidase activation peptide	4	5	5	5	4	5	5	4	4	4
PF02709	Family	Glyco_transf_7C	N-terminal domain of galactosyltransferase	4	5	4	5	5	5	4	4	4	3
PF02779	Domain	Transket_pyr	Transketolase, pyrimidine binding domain	4	5	5	5	4	4	5	4	4	5
PF02866	Domain	Ldh_1_C	lactate/malate dehydrogenase, alpha/beta C-terminal domain	4	4	4	3	7	6	5	4	5	4
PF03024	Domain	Folate_rec	Folate receptor family	4	4	4	3	3	2	5	4	4	4
PF03031	Family	NIF	NLI interacting factor-like phosphatase	4	5	5	5	6	5	5	4	4	4
PF03143	Domain	GTP_EFTU_D3	Elongation factor Tu C-terminal domain	4	5	4	5	4	4	3	3	3	4
PF03226	Domain	Yippee-Mis18	Yippee zinc-binding/DNA-binding /Mis18, centromere assembly	4	4	4	6	5	4	5	4	4	4
PF04212	Domain	MIT	MIT (microtubule interacting and transport) domain	4	5	5	5	4	5	5	4	4	4
PF04218	Domain	CENP-B_N	CENP-B N-terminal DNA-binding domain	4	7	5	6	6	5	7	4	7	6
PF04389	Family	Peptidase_M28	Peptidase family M28	4	5	6	6	5	5	6	5	6	5
PF04547	Family	Anoctamin	Calcium-activated chloride channel	4	5	6	6	5	7	6	5	5	5
PF04666	Family	Glyco_transf_54	N-Acetylglucosaminyltransferase-IV (GnT-IV) conserved region	4	3	5	2	3	2	2	3	4	4
PF05347	Family	Complex1_LYR	Complex 1 protein (LYR family)	4	4	5	6	7	5	5	5	5	5
PF05773	Domain	RWD	RWD domain	4	6	6	6	5	5	6	6	5	5
PF06017	Family	Myosin_TH1	Unconventional myosin tail, actin- and lipid-binding	4	4	5	5	4	5	5	4	4	4
PF07527	Domain	Hairy_orange	Hairy Orange	4	6	6	6	5	5	6	5	6	6
PF07974	Domain	EGF_2	EGF-like domain	4	6	9	7	6	7	7	6	6	7
PF08241	Domain	Methyltransf_11	Methyltransferase domain	4	5	4	4	4	4	5	6	4	3
PF10401	Family	IRF-3	Interferon-regulatory factor 3	4	5	5	5	4	5	4	4	4	4
PF10569	Domain	Thiol-ester_cl	Alpha-macro-globulin thiol-ester bond-forming region	4	5	5	4	5	4	6	5	5	6
PF10584	Domain	Proteasome_A_N	Proteasome subunit A N-terminal signature	4	5	5	5	5	4	5	4	4	4
PF11838	Domain	ERAP1_C	ERAP1-like C-terminal domain	4	5	5	4	4	4	5	4	5	4
PF12624	Family	Chorein_N	N-terminal region of Chorein or VPS13	4	5	5	5	4	4	5	4	4	4
PF13410	Domain	GST_C_2	Glutathione S-transferase, C-terminal domain	4	5	4	5	5	4	5	4	5	4
PF13894	Domain	zf-C2H2_4	C2H2-type zinc finger	4	2	4	2	2	1	2	3	2	2
PF14598	Domain	PAS_11	PAS domain	4	5	5	5	5	5	5	5	6	6
PF17039	Domain	Glyco_tran_10_N	Fucosyltransferase, N-terminal	4	4	3	3	3	3	5	3	3	3
PF17207	Domain	MCM_OB	MCM OB domain	4	5	5	5	4	5	5	4	4	4
PF00088	Domain	Trefoil	Trefoil (P-type) domain	4	4	5	3	4	4	5	4	5	4
PF00244	Domain	14-3-3	14-3-3 protein	4	4	4	5	6	4	4	4	4	4
PF00255	Family	GSHPx	Glutathione peroxidase	4	5	5	4	4	4	5	4	4	5
PF00305	Domain	Lipoxygenase	Lipoxygenase	4	2	2	3	3	2	3	4	3	4
PF00328	Family	His_Phos_2	Histidine phosphatase superfamily (branch 2)	4	5	3	4	4	4	5	4	4	4
PF00467	Family	KOW	KOW motif	4	4	5	5	7	5	5	4	4	4
PF00812	Domain	Ephrin	Ephrin	4	5	5	5	4	4	5	4	4	4
PF00852	Family	Glyco_transf_10	Glycosyltransferase family 10 (fucosyltransferase) C-term	4	3	3	3	3	3	5	3	3	3
PF00888	Family	Cullin	Cullin family	4	5	5	5	4	5	5	4	4	4
PF00956	Family	NAP	Nucleosome assembly protein (NAP)	4	6	5	3	2	3	5	4	4	6
PF00969	Domain	MHC_II_beta	Class II histocompatibility antigen, beta domain	4	3	5	2	3	2	6	3	5	4
PF01017	Family	STAT_alpha	STAT protein, all-alpha domain	4	4	4	4	4	2	3	3	3	3
PF01055	Family	Glyco_hydro_31	Glycosyl hydrolases family 31	4	5	5	5	4	4	4	3	3	4
PF01342	Family	SAND	SAND domain	4	4	4	3	3	4	4	5	4	3
PF01501	Family	Glyco_transf_8	Glycosyl transferase family 8	4	4	6	5	4	4	5	4	4	4
PF01749	Family	IBB	Importin beta binding domain	4	4	4	4	3	5	4	3	4	4
PF01823	Domain	MACPF	MAC/Perforin domain	4	4	5	3	5	4	4	4	4	4
PF02189	Motif	ITAM	Immunoreceptor tyrosine-based activation motif	4	2	3	2	3	3	3	4	2	3
PF02212	Family	GED	Dynamin GTPase effector domain	4	2	3	3	3	4	3	2	3	3
PF02257	Domain	RFX_DNA_binding	RFX DNA-binding domain	4	6	5	5	4	5	5	5	5	5
PF02463	Domain	SMC_N	RecF/RecN/SMC N terminal domain	4	4	3	4	3	4	4	4	5	4
PF02815	Domain	MIR	MIR domain	4	5	4	5	5	5	6	5	4	4
PF02865	Domain	STAT_int	STAT protein, protein interaction domain	4	4	3	5	4	4	4	3	4	4
PF02902	Domain	Peptidase_C48	Ulp1 protease family, C-terminal catalytic domain	4	4	4	4	4	5	4	6	4	4
PF03151	Family	TPT	Triose-phosphate Transporter family	4	5	5	5	3	4	5	4	4	4
PF03281	Family	Mab-21	Mab-21 protein	4	4	5	5	4	3	4	4	4	4
PF03370	Domain	CBM_21	Carbohydrate/starch-binding module (family 21)	4	4	3	5	4	3	4	4	4	4
PF03414	Family	Glyco_transf_6	Glycosyltransferase family 6	4	7	4	3	4	3	2	4	4	4
PF04116	Family	FA_hydroxylase	Fatty acid hydroxylase superfamily	4	4	3	3	4	4	3	3	3	3
PF04749	Family	PLAC8	PLAC8 family	4	3	2	2	2	2	2	1	2	2
PF04819	Family	DUF716	Family of unknown function (DUF716)	4	4	3	3	3	5	2	5	4	3
PF05033	Family	Pre-SET	Pre-SET motif	4	4	4	5	3	4	5	4	4	4
PF05699	Domain	Dimer_Tnp_hAT	hAT family C-terminal dimerisation region	4	5	3	3	2	3	3	2	5	3
PF05805	Family	L6_membrane	L6 membrane protein	4	4	3	3	3	4	3	3	4	3
PF06021	Family	Gly_acyl_tr_N	Aralkyl acyl-CoA:amino acid N-acyltransferase	4	2	2	2	3	2	3	2	3	4
PF06747	Domain	CHCH	CHCH domain	4	4	3	5	4	4	3	2	3	3
PF08416	Family	PTB	Phosphotyrosine-binding domain	4	5	5	5	4	4	5	4	4	4
PF08444	Family	Gly_acyl_tr_C	Aralkyl acyl-CoA:amino acid N-acyltransferase, C-terminal region	4	2	2	2	3	2	3	2	3	4
PF09815	Family	XK-related	XK-related protein	4	5	5	5	4	5	5	4	4	4
PF10513	Family	EPL1	Enhancer of polycomb-like	4	5	4	5	3	3	5	4	4	4
PF12881	Family	NUT	NUT protein	4	1	1	2	1	1	4	1	1	1
PF13365	Domain	Trypsin_2	Trypsin-like peptidase domain	4	4	3	3	3	3	4	3	4	3
PF13385	Domain	Laminin_G_3	Concanavalin A-like lectin/glucanases superfamily	4	4	5	4	4	4	5	6	4	5
PF13649	Domain	Methyltransf_25	Methyltransferase domain	4	3	4	3	5	4	3	3	4	4
PF13837	Domain	Myb_DNA-bind_4	Myb/SANT-like DNA-binding domain	4	4	3	4	4	3	5	3	5	4
PF14707	Domain	Sulfatase_C	C-terminal region of aryl-sulfatase	4	4	3	5	4	3	5	2	5	3
PF14914	Family	LRRC37AB_C	LRRC37A/B like protein 1 C-terminal domain	4	1	1	1	3	1	2	1	1	1
PF16005	Domain	MOEP19	KH-like RNA-binding domain	4	3	2	1	5	2	3	3	1	1
PF16186	Family	Arm_3	Atypical Arm repeat	4	4	5	4	3	4	4	3	4	4
PF00111	Domain	Fer2	2Fe-2S iron-sulfur cluster binding domain	3	2	4	4	3	4	2	4	5	3
PF00273	Domain	Serum_albumin	Serum albumin family	3	3	3	2	2	2	2	3	3	3
PF00370	Domain	FGGY_N	FGGY family of carbohydrate kinases, N-terminal domain	3	4	3	4	3	4	3	4	3	4
PF00653	Domain	BIR	Inhibitor of Apoptosis domain	3	4	3	3	3	4	5	5	4	4
PF00704	Domain	Glyco_hydro_18	Glycosyl hydrolases family 18	3	5	6	6	5	5	4	5	4	4
PF00743	Family	FMO-like	Flavin-binding monooxygenase-like	3	4	4	5	4	5	3	5	3	4
PF00753	Domain	Lactamase_B	Metallo-beta-lactamase superfamily	3	2	2	3	3	4	3	3	3	3
PF00804	Domain	Syntaxin	Syntaxin	3	5	5	4	4	5	5	4	4	4
PF00887	Domain	ACBP	Acyl CoA binding protein	3	5	5	5	7	5	4	4	4	4
PF01031	Family	Dynamin_M	Dynamin central region	3	2	3	3	3	4	3	2	3	3
PF01064	Domain	Activin_recp	Activin types I and II receptor domain	3	4	5	5	4	3	5	5	4	4
PF01124	Family	MAPEG	MAPEG family	3	3	3	4	4	2	3	3	3	3
PF01138	Domain	RNase_PH	3' exoribonuclease family, domain 1	3	4	4	5	3	3	4	4	4	4
PF01223	Domain	Endonuclease_NS	DNA/RNA non-specific endonuclease	3	3	3	3	2	1	3	2	3	3
PF02196	Domain	RBD	Raf-like Ras-binding domain	3	4	4	3	3	4	3	3	3	4
PF02197	Domain	RIIa	Regulatory subunit of type II PKA R-subunit	3	4	3	3	3	2	4	3	3	3
PF02376	Domain	CUT	CUT domain	3	4	3	5	4	4	4	4	4	4
PF02892	Domain	zf-BED	BED zinc finger	3	4	3	3	3	2	3	1	3	3
PF02953	Domain	zf-Tim10_DDP	Tim10/DDP family zinc finger	3	4	3	4	4	3	3	4	3	3
PF02991	Domain	Atg8	Autophagy protein Atg8 ubiquitin like	3	4	3	3	5	4	4	3	5	3
PF03020	Domain	LEM	LEM domain	3	4	4	3	4	2	3	4	3	4
PF03522	Family	SLC12	Solute carrier family 12	3	4	4	3	4	4	4	4	5	4
PF03637	Family	Mob1_phocein	Mob1/phocein family	3	4	3	3	4	4	5	4	4	3
PF03645	Family	Tctex-1	Tctex-1 family	3	4	3	3	4	4	3	6	3	3
PF04516	Family	CP2	CP2 transcription factor	3	4	4	4	4	4	3	3	4	3
PF04707	Family	PRELI	PRELI-like family	3	4	3	5	5	3	3	3	3	3
PF04775	Family	Bile_Hydr_Trans	Acyl-CoA thioester hydrolase/BAAT N-terminal region	3	3	2	3	3	3	3	5	4	4
PF05605	Domain	zf-Di19	Drought induced 19 protein (Di19), zinc-binding	3	4	5	5	5	5	3	4	4	3
PF06470	Domain	SMC_hinge	SMC proteins Flexible Hinge Domain	3	4	3	3	3	4	3	3	4	4
PF07145	Motif	PAM2	Ataxin-2 C-terminal region	3	4	5	5	3	4	5	4	4	5
PF07303	Domain	Occludin_ELL	Occludin homology domain	3	4	3	3	4	5	3	3	3	3
PF07732	Domain	Cu-oxidase_3	Multicopper oxidase	3	3	2	3	3	4	3	3	3	4
PF07810	Domain	TMC	TMC domain	3	4	4	5	4	5	5	4	4	4
PF07973	Domain	tRNA_SAD	Threonyl and Alanyl tRNA synthetase second additional domain	3	4	3	3	3	2	4	3	3	3
PF08016	Family	PKD_channel	Polycystin cation channel	3	4	4	2	4	3	3	4	4	4
PF08030	Domain	NAD_binding_6	Ferric reductase NAD binding domain	3	4	3	3	3	2	4	3	4	4
PF08487	Family	VIT	Vault protein inter-alpha-trypsin domain	3	4	5	5	4	4	5	5	4	4
PF11878	Family	DUF3398	Domain of unknown function (DUF3398)	3	4	2	3	3	2	3	3	3	3
PF11976	Family	Rad60-SLD	Ubiquitin-2 like Rad60 SUMO-like	3	3	3	3	5	5	3	2	3	3
PF12012	Family	DUF3504	Domain of unknown function (DUF3504)	3	4	3	3	2	4	3	3	3	3
PF12202	Domain	OSR1_C	Oxidative-stress-responsive kinase 1 C-terminal domain	3	4	3	3	2	4	3	3	3	3
PF12661	Domain	hEGF	Human growth factor-like EGF	3	5	5	5	2	6	6	3	3	5
PF13306	Repeat	LRR_5	BspA type Leucine rich repeat region (6 copies)	3	2	2	2	2	2	3	1	2	2
PF13621	Domain	Cupin_8	Cupin-like domain	3	4	4	5	3	5	5	3	3	3
PF13695	Domain	zf-3CxxC	Zinc-binding domain	3	4	3	3	3	4	4	3	4	4
PF14843	Domain	GF_recep_IV	Growth factor receptor domain IV	3	4	3	4	3	2	3	3	3	3
PF15177	Domain	IL28A	Interleukin-28A	3	2	1	3	1	2	2	2	3	3
PF15494	Domain	SRCR_2	Scavenger receptor cysteine-rich domain	3	3	4	4	3	4	4	3	4	3
PF16457	Domain	PH_12	Pleckstrin homology domain	3	4	4	3	4	4	3	4	3	3
PF00024	Domain	PAN_1	PAN domain	3	3	3	3	3	3	5	3	3	3
PF00152	Domain	tRNA-synt_2	tRNA synthetases class II (D, K and N)	3	3	3	5	3	3	3	3	3	3
PF00235	Domain	Profilin	Profilin	3	2	3	2	5	2	2	2	3	2
PF00383	Family	dCMP_cyt_deam_1	Cytidine and deoxycytidylate deaminase zinc-binding region	3	3	2	3	2	3	3	3	2	2
PF00389	Domain	2-Hacid_dh	D-isomer specific 2-hydroxyacid dehydrogenase, catalytic domain	3	2	3	3	2	3	2	2	3	3
PF00638	Family	Ran_BP1	RanBP1 domain	3	3	3	3	3	3	7	3	3	3
PF00659	Family	POLO_box	POLO box duplicated region	3	2	2	3	3	2	2	3	3	2
PF00751	Family	DM	DM DNA binding domain	3	4	4	4	3	2	3	4	5	5
PF00752	Family	XPG_N	XPG N-terminal domain	3	2	3	2	2	2	3	2	3	3
PF00941	Family	FAD_binding_5	FAD binding domain in molybdopterin dehydrogenase	3	2	3	3	2	3	1	3	4	2
PF01096	Domain	TFIIS_C	Transcription factor S-II (TFIIS)	3	4	3	5	4	4	3	3	3	3
PF01291	Domain	LIF_OSM	LIF / OSM family	3	5	2	2	1	2	1	1	1	1
PF01315	Domain	Ald_Xan_dh_C	Aldehyde oxidase and xanthine dehydrogenase, a/b hammerhead domain	3	2	3	3	2	3	1	3	4	2
PF01476	Domain	LysM	LysM domain	3	3	3	3	3	2	3	2	4	3
PF01612	Domain	DNA_pol_A_exo1	3'-5' exonuclease	3	2	3	3	2	2	3	2	2	3
PF01630	Domain	Glyco_hydro_56	Hyaluronidase	3	3	3	3	3	5	3	4	3	4
PF01799	Domain	Fer2_2	[2Fe-2S] binding domain	3	2	3	3	2	3	1	3	4	2
PF02466	Family	Tim17	Tim17/Tim22/Tim23/Pmp24 family	3	4	4	5	3	4	4	4	3	4
PF02738	Domain	Ald_Xan_dh_C2	Molybdopterin-binding domain of aldehyde dehydrogenase	3	2	3	3	2	3	1	3	4	2
PF03061	Domain	4HBT	Thioesterase superfamily	3	3	3	3	4	2	3	3	3	4
PF03068	Family	PAD	Protein-arginine deiminase (PAD)	3	3	2	2	2	2	3	3	3	3
PF03450	Domain	CO_deh_flav_C	CO dehydrogenase flavoprotein C-terminal domain	3	2	2	2	2	3	1	3	4	2
PF03803	Domain	Scramblase	Scramblase	3	2	3	2	2	2	3	3	2	3
PF03920	Family	TLE_N	Groucho/TLE N-terminal Q-rich domain	3	3	3	3	3	1	3	3	2	3
PF03982	Family	DAGAT	Diacylglycerol acyltransferase	3	4	4	3	3	4	4	4	4	5
PF04427	Domain	Brix	Brix domain	3	3	3	3	5	3	3	3	3	3
PF04598	Family	Gasdermin	Gasdermin pore forming domain	3	4	2	2	4	2	3	5	4	3
PF06312	Family	Neurexophilin	Neurexophilin	3	5	5	3	4	4	5	4	5	5
PF07528	Domain	DZF	DZF domain	3	2	2	3	3	3	3	3	3	4
PF08005	Domain	PHR	PHR domain	3	3	3	3	2	4	3	2	3	3
PF08151	Domain	FerI	FerI (NUC094) domain	3	3	2	2	3	2	2	3	3	3
PF08526	Domain	PAD_N	Protein-arginine deiminase (PAD) N-terminal domain	3	3	2	2	2	2	3	3	3	3
PF08527	Domain	PAD_M	Protein-arginine deiminase (PAD) middle domain	3	3	2	2	2	2	3	3	3	3
PF08763	Domain	Ca_chan_IQ	Voltage gated calcium channel IQ domain	3	5	4	3	4	4	4	4	4	4
PF08840	Domain	BAAT_C	BAAT / Acyl-CoA thioester hydrolase C terminal	3	4	2	3	3	4	3	5	4	4
PF10242	Family	L_HMGIC_fpl	Lipoma HMGIC fusion partner-like protein	3	4	3	4	3	3	3	4	3	4
PF10262	Family	Rdx	Rdx family	3	2	3	2	2	1	3	3	3	3
PF10421	Domain	OAS1_C	2'-5'-oligoadenylate synthetase 1, domain 2, C-terminus	3	3	3	3	2	2	2	6	3	3
PF11717	Family	Tudor-knot	RNA binding activity-knot of a chromodomain	3	3	4	3	3	2	3	4	4	3
PF13519	Domain	VWA_2	von Willebrand factor type A domain	3	2	3	5	3	4	3	4	3	4
PF14634	Domain	zf-RING_5	zinc-RING finger domain	3	4	3	3	3	2	3	4	3	3
PF15186	Family	TEX13	Testis-expressed sequence 13 protein family	3	3	2	2	3	1	2	2	3	2
PF16165	Family	Ferlin_C	Ferlin C-terminus	3	3	2	2	3	2	2	3	2	3
PF16184	Domain	Cadherin_3	Cadherin-like	3	4	3	3	3	2	3	3	3	4
PF16297	Family	DUF4939	Domain of unknown function (DUF4939)	3	4	3	5	3	4	6	4	5	4
PF16589	Family	BRCT_2	BRCT domain, a BRCA1 C-terminus domain	3	4	3	3	3	4	2	4	3	3
PF16878	Domain	SIX1_SD	Transcriptional regulator, SIX1, N-terminal SD domain	3	5	4	4	4	3	4	3	3	4
PF17205	Domain	PSI_integrin	Integrin plexin domain	3	4	4	5	3	4	5	5	4	4
PF00113	Domain	Enolase_C	Enolase, C-terminal TIM barrel domain	2	2	2	3	3	4	2	3	2	2
PF00183	Family	HSP90	Hsp90 protein	2	4	2	3	3	3	2	2	2	2
PF00232	Domain	Glyco_hydro_1	Glycosyl hydrolase family 1	2	2	3	3	3	3	2	2	3	3
PF00252	Family	Ribosomal_L16	Ribosomal protein L16p/L10e	2	2	2	3	4	4	2	2	2	2
PF00262	Family	Calreticulin	Calreticulin family	2	3	3	2	2	3	2	3	4	2
PF00357	Family	Integrin_alpha	Integrin alpha cytoplasmic region	2	2	1	2	1	1	2	1	2	2
PF00578	Domain	AhpC-TSA	AhpC/TSA family	2	3	3	4	5	2	3	3	3	3
PF00658	Family	PABP	Poly-adenylate binding protein, unique domain	2	2	2	3	4	2	3	3	3	2
PF00681	Repeat	Plectin	Plectin repeat	2	3	2	2	2	3	3	3	3	3
PF00828	Family	Ribosomal_L27A	Ribosomal proteins 50S-L15, 50S-L18e, 60S-L27A	2	1	1	2	2	2	1	1	1	1
PF00860	Family	Xan_ur_permease	Permease family	2	2	2	2	2	2	2	2	4	3
PF00992	Family	Troponin	Troponin	2	4	3	3	3	4	3	3	3	3
PF01048	Domain	PNP_UDP_1	Phosphorylase superfamily	2	2	3	3	2	3	2	3	4	3
PF01073	Family	3Beta_HSD	3-beta hydroxysteroid dehydrogenase/isomerase family	2	3	3	2	3	3	3	6	3	3
PF01074	Domain	Glyco_hydro_38N	Glycosyl hydrolases family 38 N-terminal domain	2	4	3	3	3	4	3	3	3	5
PF01129	Family	ART	NAD:arginine ADP-ribosyltransferase	2	2	2	2	3	2	2	3	2	6
PF01153	Family	Glypican	Glypican	2	4	3	3	3	4	3	3	3	3
PF01465	Family	GRIP	GRIP domain	2	2	2	2	2	2	6	2	2	2
PF01500	Family	Keratin_B2	Keratin, high sulfur B2 protein	2	1	2	3	1	1	3	2	3	4
PF01821	Domain	ANATO	Anaphylotoxin-like domain	2	2	3	2	2	2	4	3	3	3
PF01920	Coiled-coil	Prefoldin_2	Prefoldin subunit	2	3	3	4	4	2	3	3	3	3
PF02038	Family	ATP1G1_PLM_MAT8	ATP1G1/PLM/MAT8 family	2	3	2	2	5	4	5	4	4	4
PF02140	Domain	Gal_Lectin	Galactose binding lectin domain	2	3	2	2	3	2	3	2	3	3
PF02544	Family	Steroid_dh	3-oxo-5-alpha-steroid 4-dehydrogenase	2	3	2	3	4	3	3	3	3	3
PF02727	Domain	Cu_amine_oxidN2	Copper amine oxidase, N2 domain	2	2	2	2	2	1	2	3	2	3
PF03946	Domain	Ribosomal_L11_N	Ribosomal protein L11, N-terminal domain	2	1	1	1	5	1	1	1	2	1
PF04201	Family	TPD52	Tumour protein D52 family	2	2	2	2	2	2	2	2	4	2
PF04253	Domain	TFR_dimer	Transferrin receptor-like dimerisation domain	2	2	2	2	2	1	3	2	3	2
PF04588	Family	HIG_1_N	Hypoxia induced protein conserved region	2	2	2	2	3	2	3	3	2	4
PF04908	Family	SH3BGR	SH3-binding, glutamic acid-rich protein	2	2	2	2	1	2	3	2	3	2
PF05207	Domain	zf-CSL	CSL zinc finger	2	1	2	1	4	1	2	1	1	1
PF05253	Domain	zf-U11-48K	U11-48K-like CHHC zinc finger	2	2	2	2	3	1	2	3	2	2
PF06046	Family	Sec6	Exocyst complex component Sec6	2	2	2	3	3	2	3	3	3	3
PF06328	Domain	Lep_receptor_Ig	Ig-like C2-type domain	2	2	2	2	4	2	2	2	2	2
PF06464	Domain	DMAP_binding	DMAP1-binding Domain	2	2	3	3	3	1	3	3	3	3
PF07748	Domain	Glyco_hydro_38C	Glycosyl hydrolases family 38 C-terminal domain	2	4	3	3	3	4	3	3	3	5
PF09325	Domain	Vps5	Vps5 C terminal like	2	4	3	2	3	2	3	2	3	2
PF10417	Domain	1-cysPrx_C	C-terminal domain of 1-Cys peroxiredoxin	2	2	3	4	5	3	3	3	2	3
PF12020	Family	TAFA	TAFA family	2	2	3	2	3	2	2	3	3	3
PF12348	Family	CLASP_N	CLASP N terminal	2	3	2	2	2	2	3	2	3	3
PF13330	Family	Mucin2_WxxW	Mucin-2 protein WxxW repeating region	2	4	4	3	3	4	3	3	5	3
PF13450	Domain	NAD_binding_8	NAD(P)-binding Rossmann-like domain	2	3	3	3	2	2	3	2	2	2
PF13843	Domain	DDE_Tnp_1_7	Transposase IS4	2	2	2	3	2	2	3	1	2	1
PF14836	Domain	Ubiquitin_3	Ubiquitin-like domain	2	3	2	2	2	3	2	3	3	3
PF00128	Domain	Alpha-amylase	Alpha amylase, catalytic domain	2	2	2	1	2	1	3	3	2	3
PF00253	Family	Ribosomal_S14	Ribosomal protein S14p/S29e	2	1	1	1	2	1	1	1	2	2
PF00298	Domain	Ribosomal_L11	Ribosomal protein L11, RNA binding domain	2	1	2	2	5	1	1	1	2	1
PF00327	Domain	Ribosomal_L30	Ribosomal protein L30p/L7e	2	2	3	1	4	3	2	2	2	2
PF00366	Domain	Ribosomal_S17	Ribosomal protein S17	2	1	2	1	3	3	1	1	1	1
PF00456	Domain	Transketolase_N	Transketolase, thiamine diphosphate binding domain	2	2	1	1	1	1	2	1	2	2
PF00466	Family	Ribosomal_L10	Ribosomal protein L10	2	2	2	2	4	2	2	1	2	2
PF00687	Domain	Ribosomal_L1	Ribosomal protein L1p/L10e family	2	2	2	2	5	2	2	2	3	2
PF00935	Family	Ribosomal_L44	Ribosomal protein L44	2	2	1	3	3	4	2	1	1	2
PF01144	Domain	CoA_trans	Coenzyme A transferase	2	2	1	1	1	2	1	2	1	2
PF01283	Family	Ribosomal_S26e	Ribosomal protein S26e	2	1	1	1	3	5	1	1	1	2
PF01370	Family	Epimerase	NAD dependent epimerase/dehydratase family	2	1	2	1	1	1	1	2	2	2
PF01479	Domain	S4	S4 domain	2	2	1	2	2	5	2	2	3	2
PF01531	Family	Glyco_transf_11	Glycosyl transferase family 11	2	2	1	1	2	1	1	2	2	2
PF01849	Family	NAC	NAC domain	2	2	2	3	4	4	3	3	2	2
PF02297	Domain	COX6B	Cytochrome oxidase c subunit VIb	2	2	2	2	1	4	2	1	2	2
PF02806	Domain	Alpha-amylase_C	Alpha amylase, C-terminal all-beta domain	2	2	2	1	2	1	3	4	2	3
PF02996	Coiled-coil	Prefoldin	Prefoldin subunit	2	2	2	4	3	2	2	2	2	2
PF04802	Family	SMK-1	Component of IIS longevity pathway SMK-1	2	2	2	1	1	1	2	3	2	1
PF04930	Family	FUN14	FUN14 family	2	2	1	2	1	1	1	1	1	2
PF05712	Family	MRG	MRG	2	2	2	1	2	2	2	4	3	2
PF06220	Domain	zf-U1	U1 zinc finger	2	2	2	2	4	2	2	2	2	2
PF06480	Family	FtsH_ext	FtsH Extracellular	2	1	1	2	2	1	1	2	1	2
PF06990	Family	Gal-3-0_sulfotr	Galactose-3-O-sulfotransferase	2	2	3	3	2	2	2	3	2	3
PF07670	Domain	Gate	Nucleoside recognition	2	2	2	2	2	1	2	2	5	2
PF07830	Domain	PP2C_C	Protein serine/threonine phosphatase 2C, C-terminal domain	2	2	1	1	1	1	2	2	2	2
PF08081	Family	RBM1CTR	RBM1CTR (NUC064) family	2	1	1	1	1	1	5	2	1	2
PF09261	Domain	Alpha-mann_mid	Alpha mannosidase middle domain	2	4	3	3	3	3	3	3	3	5
PF12053	Family	Par3_HAL_N_term	N-terminal of Par3 and HAL proteins	2	1	2	2	2	1	1	2	1	1
PF12752	Domain	SUZ	SUZ domain	2	2	1	1	1	1	2	2	2	2
PF13202	Domain	EF-hand_5	EF hand	2	4	3	3	3	4	2	3	4	3
PF13460	Domain	NAD_binding_10	NAD(P)H-binding	2	2	1	1	2	1	1	1	1	2
PF13641	Domain	Glyco_tranf_2_3	Glycosyltransferase like family 2	2	2	1	1	2	1	1	1	2	2
PF14048	Family	MBD_C	C-terminal domain of methyl-CpG binding protein 2 and 3	2	2	2	3	2	2	5	2	3	2
PF14560	Domain	Ubiquitin_2	Ubiquitin-like domain	2	1	1	2	2	1	2	2	2	1
PF14988	Family	DUF4515	Domain of unknown function (DUF4515)	2	2	2	2	2	2	2	4	2	2
PF14992	Family	TMCO5	TMCO5 family	2	2	1	1	2	1	1	2	2	2
PF15017	Disordered	WRNPLPNID	Putative WW-binding domain and destruction box	2	1	1	1	2	1	2	2	1	1
PF15118	Family	DUF4560	Domain of unknown function (DUF4560)	2	3	1	1	3	1	2	1	2	2
PF15242	Family	FAM53	Family of FAM53	2	2	1	2	1	1	2	2	1	1
PF15262	Family	DUF4592	Domain of unknown function (DUF4592)	2	1	1	2	2	1	2	2	1	1
PF15277	Domain	Sec3-PIP2_bind	Exocyst complex component SEC3 N-terminal PIP2 binding PH	2	2	1	1	1	1	2	1	2	2
PF15316	Family	MDFI	MyoD family inhibitor	2	1	1	1	1	1	2	2	2	2
PF15692	Family	NKAP	NF-kappa-B-activating protein	2	2	2	2	1	1	2	1	1	2
PF15705	Family	TMEM132D_N	Mature oligodendrocyte transmembrane protein, TMEM132D, N-term	2	2	3	3	2	2	3	3	3	3
PF15831	Family	DUF4713	Domain of unknown function (DUF4713)	2	2	2	1	3	2	1	2	2	1
PF16564	Domain	MBDa	p55-binding region of Methyl-CpG-binding domain proteins MBD	2	2	2	3	3	2	5	2	3	2
PF16674	Domain	UCH_N	N-terminal of ubiquitin carboxyl-terminal hydrolase 37	2	1	1	1	1	2	2	2	2	1
PF16891	Family	STPPase_N	Serine-threonine protein phosphatase N-terminal domain	2	2	2	2	4	1	2	2	2	2
PF16906	Family	Ribosomal_L26	Ribosomal proteins L26 eukaryotic, L24P archaeal	2	1	1	3	4	2	1	1	1	1
PF00034	Domain	Cytochrom_C	Cytochrome c	1	2	1	3	3	1	1	1	1	2
PF00181	Domain	Ribosomal_L2	Ribosomal Proteins L2, RNA binding domain	1	1	1	1	3	1	1	1	1	1
PF00237	Domain	Ribosomal_L22	Ribosomal protein L22p/L17e	1	1	1	4	4	1	2	1	1	1
PF00238	Domain	Ribosomal_L14	Ribosomal protein L14p/L23e	1	2	1	2	3	1	1	3	1	1
PF00245	Domain	Alk_phosphatase	Alkaline phosphatase	1	1	1	1	1	1	2	2	2	3
PF00333	Domain	Ribosomal_S5	Ribosomal protein S5, N-terminal domain	1	1	2	2	4	2	1	1	2	1
PF00736	Domain	EF1_GNE	EF-1 guanine nucleotide exchange domain	1	1	1	1	4	1	1	1	1	1
PF00900	Family	Ribosomal_S4e	Ribosomal family S4e	1	1	1	2	3	4	2	1	2	1
PF01187	Domain	MIF	Macrophage migration inhibitory factor (MIF)	1	1	1	2	3	1	2	1	1	2
PF01201	Family	Ribosomal_S8e	Ribosomal protein S8e	1	1	1	1	3	2	1	1	1	1
PF01287	Domain	eIF-5a	Eukaryotic elongation factor 5A hypusine, DNA-binding OB fold	1	1	2	2	1	2	2	1	1	1
PF01425	Family	Amidase	Amidase	1	1	2	1	2	1	2	1	2	2
PF01472	Family	PUA	PUA domain	1	1	1	2	2	2	1	2	2	2
PF01607	Domain	CBM_14	Chitin binding Peritrophin-A domain	1	1	3	3	3	2	1	1	1	2
PF01778	Family	Ribosomal_L28e	Ribosomal L28e protein family	1	1	1	1	4	2	1	1	1	1
PF01780	Family	Ribosomal_L37ae	Ribosomal L37ae protein family	1	2	1	1	2	4	1	1	1	1
PF01840	Family	TCL1_MTCP1	TCL1/MTCP1 family	1	1	1	1	1	1	2	4	1	2
PF01873	Family	eIF-5_eIF-2B	Domain found in IF2B/IF5	1	1	1	1	2	1	1	1	3	1
PF02234	Family	CDI	Cyclin-dependent kinase inhibitor	1	1	1	2	2	1	2	2	2	2
PF02238	Family	COX7a	Cytochrome c oxidase subunit VII	1	1	1	2	2	2	2	1	2	2
PF02985	Repeat	HEAT	HEAT repeat	1	1	2	1	2	3	2	1	2	2
PF03009	Family	GDPD	Glycerophosphoryl diester phosphodiesterase family	1	1	2	1	2	2	2	1	3	2
PF03145	Family	Sina	Seven in absentia protein family	1	2	2	2	2	5	2	2	2	4
PF03381	Family	CDC50	LEM3 (ligand-effect modulator 3) family / CDC50 family	1	1	1	1	2	1	1	2	2	2
PF03671	Family	Ufm1	Ubiquitin fold modifier 1 protein	1	1	1	3	1	1	1	1	1	1
PF03719	Domain	Ribosomal_S5_C	Ribosomal protein S5, C-terminal domain	1	1	2	2	5	2	1	1	2	1
PF03931	Domain	Skp1_POZ	Skp1 family, tetramerisation domain	1	1	1	1	3	1	1	2	1	1
PF03943	Domain	TAP_C	TAP C-terminal domain	1	2	1	2	1	2	2	2	3	1
PF04628	Family	Sedlin_N	Sedlin, N-terminal conserved region	1	1	1	1	2	2	2	2	1	1
PF04704	Family	Zfx_Zfy_act	Zfx / Zfy transcription activation region	1	1	2	1	1	1	2	2	3	1
PF04901	Family	RAMP	Receptor activity modifying family	1	2	1	1	1	1	2	2	2	2
PF04968	Family	CHORD	CHORD	1	1	2	1	1	2	1	1	3	1
PF05184	Domain	SapB_1	Saposin-like type B, region 1	1	2	1	1	1	1	2	2	2	2
PF05328	Family	CybS	CybS, succinate dehydrogenase cytochrome B small subunit	1	1	1	4	1	1	1	1	1	1
PF05392	Family	COX7B	Cytochrome C oxidase chain VIIB	1	2	1	1	3	2	1	1	1	1
PF05395	Family	DARPP-32	Protein phosphatase inhibitor 1/DARPP-32	1	2	2	2	2	1	2	1	2	1
PF05587	Domain	Anth_Ig	Anthrax receptor extracellular domain	1	1	1	1	1	1	2	3	3	3
PF05741	Family	zf-nanos	Nanos RNA binding domain	1	1	1	2	2	1	2	2	2	1
PF06473	Family	FGF-BP1	FGF binding protein 1 (FGF-BP1)	1	1	1	1	1	1	2	1	3	1
PF06565	Domain	DUF1126	DUF1126 PH-like domain	1	1	1	1	2	1	2	2	1	2
PF06607	Family	Prokineticin	Prokineticin	1	1	1	2	1	2	2	2	2	1
PF07657	Family	MNNL	N terminus of Notch ligand	1	2	2	2	3	2	2	2	3	2
PF08079	Domain	Ribosomal_L30_N	Ribosomal L30 N-terminal domain	1	2	2	1	4	2	1	1	1	1
PF08430	Family	Forkhead_N	Forkhead N-terminal region	1	1	1	1	1	1	2	2	2	2
PF08504	Family	RunxI	Runx inhibition domain	1	1	2	2	2	2	2	1	1	1
PF09443	Domain	CFC	Cripto_Frl-1_Cryptic (CFC)	1	1	2	1	1	1	2	1	2	2
PF09769	Family	ApoO	Apolipoprotein O	1	1	2	1	1	1	1	1	3	1
PF10226	Family	CCDC85	CCDC85 family	1	1	1	2	1	1	2	2	2	2
PF10581	Domain	Synapsin_N	Synapsin N-terminal	1	2	1	1	2	1	2	2	2	2
PF10587	Domain	EF-1_beta_acid	Eukaryotic elongation factor 1 beta central acidic region	1	1	1	1	5	1	1	1	1	1
PF10601	Family	zf-LITAF-like	LITAF-like zinc ribbon domain	1	1	2	2	1	1	2	2	2	2
PF10608	Domain	MAGUK_N_PEST	Polyubiquitination (PEST) N-terminal domain of MAGUK	1	1	1	1	1	1	2	2	2	2
PF11627	Family	HnRNPA1	Nuclear factor hnRNPA1	1	1	1	1	3	1	1	1	1	3
PF11779	Family	SPT_ssu-like	Small subunit of serine palmitoyltransferase-like	1	1	1	3	2	1	1	1	1	1
PF11952	Family	XTBD	XRN-Two Binding Domain, XTBD	1	1	1	1	2	1	1	2	2	2
PF12045	Family	DUF3528	Protein of unknown function (DUF3528)	1	1	1	2	1	1	2	2	2	2
PF12678	Domain	zf-rbx1	RING-H2 zinc finger domain	1	1	2	2	1	1	1	2	1	2
PF13180	Domain	PDZ_2	PDZ domain	1	3	3	3	2	2	2	3	3	2
PF13419	Family	HAD_2	Haloacid dehalogenase-like hydrolase	1	1	1	2	1	2	2	1	1	2
PF13469	Domain	Sulfotransfer_3	Sulfotransferase family	1	1	2	1	1	1	2	2	2	2
PF13656	Domain	RNA_pol_L_2	RNA polymerase Rpb3/Rpb11 dimerisation domain	1	1	1	2	3	1	2	1	1	1
PF13838	Domain	Clathrin_H_link	Clathrin-H-link	1	2	1	1	2	2	2	1	1	1
PF13847	Domain	Methyltransf_31	Methyltransferase domain	1	2	1	1	1	1	2	2	2	1
PF13865	Family	FoP_duplication	C-terminal duplication domain of Friend of PRMT1	1	1	1	1	1	1	1	5	1	1
PF13879	Family	KIAA1430	KIAA1430 homologue	1	1	1	1	1	1	2	2	2	2
PF13898	Domain	DUF4205	Domain of unknown function (DUF4205)	1	1	2	2	1	1	1	1	2	2
PF14047	Family	DCR	Dppa2/4 conserved region	1	1	1	1	3	2	1	1	1	1
PF14444	Domain	S1-like	S1-like	1	2	1	1	1	1	2	2	2	2
PF14642	Family	FAM47	FAM47 family	1	1	1	1	1	1	3	2	1	1
PF14769	Family	CLAMP	Flagellar C1a complex subunit C1a-32	1	2	1	1	2	1	2	1	2	2
PF14948	Family	RESP18	RESP18 domain	1	2	2	1	2	2	1	1	1	1
PF15232	Family	DUF4585	Domain of unknown function (DUF4585)	1	2	1	1	1	1	2	2	2	2
PF16121	Family	40S_S4_C	40S ribosomal protein S4 C-terminus	1	1	1	2	2	2	2	1	2	1
PF16205	Family	Ribosomal_S17_N	Ribosomal_S17 N-terminal	1	1	1	1	3	3	1	1	1	1
PF16322	Family	Tub_N	Tubby N-terminal	1	2	2	2	1	1	1	2	2	2
PF16474	Domain	KIND	Kinase non-catalytic C-lobe domain	1	2	1	1	1	2	2	2	2	2
PF17284	Domain	Spermine_synt_N	Spermidine synthase tetramerisation domain	1	1	2	2	1	2	1	2	1	1
PF00184	Family	Hormone_5	Neurohypophysial hormones, C-terminal Domain	1	1	1	1	1	3	1	1	1	1
PF00281	Domain	Ribosomal_L5	Ribosomal protein L5	1	1	1	1	3	2	1	2	1	1
PF00416	Family	Ribosomal_S13	Ribosomal protein S13/S18	1	1	1	1	3	1	1	1	1	1
PF00673	Domain	Ribosomal_L5_C	ribosomal L5P family C-terminus	1	1	1	1	3	2	1	2	1	1
PF01015	Family	Ribosomal_S3Ae	Ribosomal S3Ae family	1	2	1	3	2	1	1	1	1	1
PF01020	Family	Ribosomal_L40e	Ribosomal L40e family	1	1	2	1	5	1	1	1	1	2
PF01157	Family	Ribosomal_L21e	Ribosomal protein L21e	1	1	1	4	1	1	1	2	2	1
PF01158	Family	Ribosomal_L36e	Ribosomal protein L36e	1	1	1	2	5	1	1	1	1	1
PF01165	Family	Ribosomal_S21	Ribosomal protein S21	1	1	1	3	3	1	1	1	1	1
PF01199	Family	Ribosomal_L34e	Ribosomal protein L34e	1	1	1	1	3	1	1	2	1	1
PF01282	Family	Ribosomal_S24e	Ribosomal protein S24e	1	1	1	3	2	1	1	1	1	1
PF01294	Family	Ribosomal_L13e	Ribosomal protein L13e	1	1	1	1	2	3	1	1	1	1
PF01599	Domain	Ribosomal_S27	Ribosomal protein S27a	1	1	1	4	4	1	1	1	1	1
PF01779	Family	Ribosomal_L29e	Ribosomal L29e protein family	1	1	1	2	3	4	1	2	1	1
PF03055	Family	RPE65	Retinal pigment epithelial membrane protein	1	2	2	1	1	1	2	2	2	2
PF03501	Domain	S10_plectin	Plectin/S10 domain	1	1	1	1	3	1	2	1	1	1
PF03656	Family	Pam16	Pam16	1	1	1	1	3	1	1	1	1	1
PF03847	Domain	TFIID_20kDa	Transcription initiation factor TFIID subunit A	1	1	1	1	3	1	1	1	1	1
PF03947	Domain	Ribosomal_L2_C	Ribosomal Proteins L2, C-terminal domain	1	1	1	1	3	1	1	1	1	1
PF04326	Domain	AlbA_2	Putative DNA-binding domain	1	2	2	1	1	1	3	5	3	2
PF05326	Family	SVA	Seminal vesicle autoantigen (SVA)	1	1	1	1	1	1	1	3	1	2
PF05365	Family	UCR_UQCRX_QCR9	Ubiquinol-cytochrome C reductase, UQCRX/QCR9 like	1	1	1	1	3	1	1	1	1	1
PF05641	Domain	Agenet	Agenet domain	1	1	1	2	1	1	2	2	2	2
PF05873	Family	Mt_ATP-synt_D	ATP synthase D chain, mitochondrial (ATP5H)	1	1	1	1	3	2	1	1	1	1
PF05915	Family	DUF872	Eukaryotic protein of unknown function (DUF872)	1	1	1	1	3	1	1	1	1	1
PF06881	Family	Elongin_A	RNA polymerase II transcription factor SIII (Elongin) subunit A	1	1	1	1	1	1	3	1	1	1
PF07683	Domain	CobW_C	Cobalamin synthesis protein cobW C-terminal domain	1	1	1	1	1	1	3	1	1	1
PF08523	Family	MBF1	Multiprotein bridging factor 1	1	1	1	1	3	1	1	1	1	1
PF08997	Domain	UCR_6-4kD	Ubiquinol-cytochrome C reductase complex, 6.4kD protein	1	1	1	1	3	1	1	1	1	1
PF09006	Coiled-coil	Surfac_D-trimer	Lung surfactant protein D coiled-coil trimerisation	1	1	1	1	1	1	1	1	1	3
PF09813	Coiled-coil	Coiled-coil_56	Coiled-coil domain-containing protein 56	1	1	1	2	4	1	1	1	1	1
PF10169	Family	Laps	Learning-associated protein	1	1	1	1	3	1	1	1	1	1
PF10200	Family	Ndufs5	NADH:ubiquinone oxidoreductase, NDUFS5-15kDa	1	1	1	1	3	1	1	1	1	1
PF12001	Family	DUF3496	Domain of unknown function (DUF3496)	1	1	1	1	1	1	3	3	1	5
PF12597	Family	DUF3767	Protein of unknown function (DUF3767)	1	1	1	1	4	1	1	1	1	1
PF12926	Family	MOZART2	Mitotic-spindle organizing gamma-tubulin ring associated	1	1	1	1	1	1	1	1	3	1
PF15159	Family	PIG-Y	Phosphatidylinositol N-acetylglucosaminyltransferase subunit Y	1	1	1	2	3	1	1	1	1	1
PF15163	Family	Meiosis_expr	Meiosis-expressed	1	1	1	1	3	1	1	1	1	1
PF15206	Family	FAM209	FAM209 family	1	1	1	1	1	1	1	1	1	3
PF15791	Family	DMRT-like	Doublesex-and mab-3-related transcription factor C1 and C2	1	1	1	1	1	1	2	3	2	1
PF15882	Family	DUF4735	Domain of unknown function (DUF4735)	1	1	1	1	5	1	1	1	1	1
PF16122	Family	40S_SA_C	40S ribosomal protein SA C-terminus	1	1	1	2	4	1	1	1	2	1
PF16704	Domain	Rab_bind	Rab binding domain	1	1	1	1	1	1	4	1	1	1
PF16740	Domain	SKA2	Spindle and kinetochore-associated protein 2	1	1	1	3	1	1	1	1	1	1
PF01049	Family	Cadherin_C	Cadherin cytoplasmic region	11	11	11	11	11	11	11	11	10	10
PF00194	Domain	Carb_anhydrase	Eukaryotic-type carbonic anhydrase	9	9	10	10	10	10	10	9	10	10
PF00155	Domain	Aminotran_1_2	Aminotransferase class I and II	9	10	10	9	10	10	10	9	10	10
PF00229	Domain	TNF	TNF(Tumour Necrosis Factor) family	9	9	10	9	9	8	9	9	9	9
PF01569	Family	PAP2	PAP2 superfamily	9	10	10	10	10	10	10	9	9	10
PF00388	Family	PI-PLC-X	Phosphatidylinositol-specific phospholipase C, X domain	8	9	9	9	9	9	9	8	9	9
PF00503	Domain	G-alpha	G-protein alpha subunit	8	9	9	9	9	9	9	8	9	9
PF00780	Family	CNH	CNH domain	8	9	9	9	8	9	9	8	9	9
PF12774	Domain	AAA_6	Hydrolytic ATP binding site of dynein motor region	8	9	9	9	8	9	9	9	9	8
PF00118	Family	Cpn60_TCP1	TCP-1/cpn60 chaperonin family	8	8	8	8	8	7	8	7	8	8
PF00193	Domain	Xlink	Extracellular link domain	8	8	8	8	8	8	8	7	8	8
PF01602	Family	Adaptin_N	Adaptin N terminal region	8	8	8	8	8	8	8	7	8	8
PF12777	Domain	MT	Microtubule-binding stalk of dynein motor	8	9	9	9	8	9	9	9	9	9
PF13832	Domain	zf-HC5HC2H_2	PHD-zinc-finger like domain	8	8	7	8	7	8	8	7	8	8
PF02736	Domain	Myosin_N	Myosin N-terminal SH3-like domain	7	8	8	7	7	7	7	7	7	7
PF03133	Family	TTL	Tubulin-tyrosine ligase family	7	8	8	8	8	8	8	7	7	8
PF00441	Domain	Acyl-CoA_dh_1	Acyl-CoA dehydrogenase, C-terminal domain	6	7	7	7	6	7	7	7	6	7
PF01398	Family	JAB	JAB1/Mov34/MPN/PAD-1 ubiquitin protease	6	7	7	7	8	7	7	7	7	7
PF00207	Family	A2M	Alpha-2-macroglobulin family	6	6	6	5	6	5	6	5	6	6
PF00786	Domain	PBD	P21-Rho-binding domain	6	5	6	6	6	6	7	6	6	6
PF00850	Domain	Hist_deacetyl	Histone deacetylase domain	6	6	6	6	5	6	6	6	6	6
PF01410	Family	COLFI	Fibrillar collagen C-terminal domain	6	6	6	6	6	7	6	6	5	6
PF01426	Domain	BAH	BAH domain	6	6	6	6	7	6	6	5	6	6
PF01593	Domain	Amino_oxidase	Flavin containing amine oxidoreductase	6	6	6	6	5	6	5	6	6	5
PF02825	Family	WWE	WWE domain	6	6	6	5	5	6	6	5	6	6
PF03131	Family	bZIP_Maf	bZIP Maf transcription factor	6	7	7	7	7	7	7	7	7	8
PF06920	Family	DHR-2	Dock homology region 2	6	6	7	6	6	6	6	6	6	6
PF07703	Family	A2M_BRD	Alpha-2-macroglobulin bait region domain	6	5	6	6	6	6	6	5	5	6
PF12906	Domain	RINGv	RING-variant domain	6	6	6	6	5	5	6	6	6	6
PF14429	Family	DOCK-C2	C2 domain in Dock180 and Zizimin proteins	6	6	6	6	6	5	6	6	6	6
PF00630	Domain	Filamin	Filamin/ABP280 repeat	5	6	6	6	6	6	6	6	5	5
PF00916	Family	Sulfate_transp	Sulfate permease family	5	6	6	6	6	6	6	6	6	6
PF00955	Family	HCO3_cotransp	HCO3- transporter family	5	6	5	6	5	5	6	5	5	5
PF01266	Domain	DAO	FAD dependent oxidoreductase	5	5	5	5	5	5	5	5	5	5
PF01534	Family	Frizzled	Frizzled/Smoothened family membrane region	5	6	6	6	7	6	6	6	6	6
PF01740	Domain	STAS	STAS domain	5	6	6	6	5	5	6	6	6	6
PF01909	Family	NTP_transf_2	Nucleotidyltransferase domain	5	6	5	5	5	5	5	6	5	6
PF02204	Family	VPS9	Vacuolar sorting protein 9 (VPS9) domain	5	5	6	6	5	5	6	5	5	5
PF02820	Domain	MBT	mbt repeat	5	5	6	5	5	5	6	5	5	5
PF07678	Domain	TED_complement	A-macroglobulin TED domain	5	6	6	6	6	5	6	5	6	6
PF13831	Family	PHD_2	PHD-finger	5	6	6	6	5	6	6	6	6	6
PF00313	Domain	CSD	'Cold-shock' DNA-binding domain	5	5	5	5	4	5	5	4	4	5
PF00364	Domain	Biotin_lipoyl	Biotin-requiring enzyme	5	5	5	5	5	5	5	5	5	5
PF00406	Domain	ADK	Adenylate kinase	5	5	5	5	5	5	5	4	5	4
PF00533	Family	BRCT	BRCA1 C Terminus (BRCT) domain	5	5	5	5	5	5	5	4	5	5
PF00557	Domain	Peptidase_M24	Metallopeptidase family M24	5	5	5	6	5	5	5	5	4	5
PF00790	Domain	VHS	VHS domain	5	5	5	5	4	5	5	5	5	5
PF00858	Family	ASC	Amiloride-sensitive sodium channel	5	5	5	5	5	5	5	4	5	5
PF00957	Family	Synaptobrevin	Synaptobrevin	5	5	6	5	5	5	6	5	5	5
PF01429	Domain	MBD	Methyl-CpG binding domain	5	5	5	5	4	5	6	5	5	5
PF01545	Family	Cation_efflux	Cation efflux family	5	5	6	6	5	5	5	5	5	5
PF01556	Domain	DnaJ_C	DnaJ C terminal domain	5	5	5	5	5	6	5	5	5	5
PF01699	Family	Na_Ca_ex	Sodium/calcium exchanger protein	5	5	5	5	5	5	5	5	5	5
PF02138	Family	Beach	Beige/BEACH domain	5	5	5	5	5	5	5	5	5	5
PF02752	Domain	Arrestin_C	Arrestin (or S-antigen), C-terminal domain	5	5	5	5	4	5	6	5	5	5
PF02886	Domain	LBP_BPI_CETP_C	LBP / BPI / CETP family, C-terminal domain	5	5	5	5	5	5	5	4	5	5
PF03098	Domain	An_peroxidase	Animal haem peroxidase	5	5	5	5	4	5	6	5	5	5
PF03129	Domain	HGTP_anticodon	Anticodon binding domain	5	5	5	5	5	5	5	5	5	5
PF03607	Family	DCX	Doublecortin	5	5	5	4	5	5	5	5	4	5
PF06367	Domain	Drf_FH3	Diaphanous FH3 Domain	5	5	5	5	4	5	5	5	5	5
PF07002	Family	Copine	Copine	5	5	5	5	5	5	5	5	5	5
PF07546	Domain	EMI	EMI domain	5	5	5	5	5	5	5	5	4	5
PF07565	Domain	Band_3_cyto	Band 3 cytoplasmic domain	5	5	5	5	5	5	5	5	5	5
PF07699	Family	Ephrin_rec_like	Putative ephrin-receptor like	5	6	6	6	5	6	6	6	6	6
PF08385	Family	DHC_N1	Dynein heavy chain, N-terminal region 1	5	5	5	5	5	5	5	5	5	5
PF13086	Domain	AAA_11	AAA domain	5	5	4	4	4	4	5	4	4	4
PF13671	Domain	AAA_33	AAA domain	5	5	5	5	4	5	5	4	5	5
PF00052	Family	Laminin_B	Laminin B (Domain IV)	4	4	4	5	4	5	5	4	4	4
PF00282	Domain	Pyridoxal_deC	Pyridoxal-dependent decarboxylase conserved domain	4	4	4	4	4	5	4	4	5	4
PF00292	Domain	PAX	'Paired box' domain	4	5	5	5	5	5	5	5	5	5
PF00324	Family	AA_permease	Amino acid permease	4	5	5	5	5	5	5	5	6	5
PF00326	Domain	Peptidase_S9	Prolyl oligopeptidase family	4	5	5	5	5	6	5	5	5	5
PF00339	Domain	Arrestin_N	Arrestin (or S-antigen), N-terminal domain	4	5	5	5	4	5	5	5	5	5
PF00341	Domain	PDGF	PDGF/VEGF domain	4	5	5	5	5	5	5	5	5	5
PF00362	Domain	Integrin_beta	Integrin beta chain VWA domain	4	5	5	5	4	5	5	5	5	4
PF00575	Domain	S1	S1 RNA binding domain	4	4	4	4	4	4	4	4	4	4
PF00613	Family	PI3Ka	Phosphoinositide 3-kinase family, accessory domain (PIK domain)	4	5	5	5	5	5	5	5	5	5
PF01335	Domain	DED	Death effector domain	4	4	4	4	4	4	4	3	4	4
PF02209	Domain	VHP	Villin headpiece domain	4	5	4	4	4	5	5	4	4	4
PF02883	Domain	Alpha_adaptinC2	Adaptin C-terminal domain	4	5	5	5	5	5	5	5	5	4
PF03160	Domain	Calx-beta	Calx-beta domain	4	5	5	5	5	5	5	5	5	5
PF04055	Domain	Radical_SAM	Radical SAM superfamily	4	4	4	5	4	4	5	4	4	4
PF06371	Domain	Drf_GBD	Diaphanous GTPase-binding Domain	4	5	5	5	5	5	5	5	5	5
PF07500	Domain	TFIIS_M	Transcription factor S-II (TFIIS), central domain	4	4	4	4	4	4	4	4	4	5
PF08337	Domain	Plexin_cytopl	Plexin cytoplasmic RasGAP domain	4	5	5	5	5	5	5	5	5	4
PF08758	Domain	Cadherin_pro	Cadherin prodomain like	4	4	5	4	4	5	4	4	4	4
PF09240	Domain	IL6Ra-bind	Interleukin-6 receptor alpha chain, binding	4	5	5	5	4	4	5	5	5	5
PF10523	Domain	BEN	BEN domain	4	5	5	5	4	5	5	5	5	5
PF12130	Domain	DUF3585	Bivalent Mical/EHBP Rab binding domain	4	5	4	5	4	4	5	4	4	4
PF13414	Repeat	TPR_11	TPR repeat	4	4	4	5	4	5	4	4	4	5
PF13848	Domain	Thioredoxin_6	Thioredoxin-like domain	4	5	5	5	5	5	5	5	5	5
PF14559	Domain	TPR_19	Tetratricopeptide repeat	4	4	4	4	4	4	4	5	4	5
PF00375	Family	SDF	Sodium:dicarboxylate symporter family	4	4	4	4	4	4	4	4	3	4
PF00683	Family	TB	TB domain	4	4	4	4	4	4	4	3	4	4
PF00757	Domain	Furin-like	Furin-like cysteine rich region	4	4	4	4	4	4	4	4	4	4
PF00792	Domain	PI3K_C2	Phosphoinositide 3-kinase C2	4	5	4	4	4	4	5	4	4	4
PF00864	Family	P2X_receptor	ATP P2X receptor	4	3	4	4	4	4	4	4	3	4
PF00868	Domain	Transglut_N	Transglutaminase family	4	5	5	5	5	5	5	5	4	4
PF00995	Family	Sec1	Sec1 family	4	4	4	4	4	4	4	4	4	4
PF01027	Family	Bax1-I	Inhibitor of apoptosis-promoting Bax1	4	4	4	4	4	3	3	4	4	4
PF01030	Domain	Recep_L_domain	Receptor L domain	4	5	4	4	4	4	4	4	4	4
PF01033	Family	Somatomedin_B	Somatomedin B domain	4	5	4	4	4	4	5	4	5	4
PF01034	Family	Syndecan	Syndecan domain	4	4	4	4	3	4	4	4	4	4
PF01151	Family	ELO	GNS1/SUR4 family	4	4	4	5	4	5	4	4	4	4
PF01189	Family	Methyltr_RsmB-F	16S rRNA methyltransferase RsmB/F	4	4	4	3	4	4	4	3	4	4
PF01431	Family	Peptidase_M13	Peptidase family M13	4	4	4	4	4	4	5	4	4	4
PF01436	Repeat	NHL	NHL repeat	4	4	4	5	4	4	4	4	4	4
PF01467	Domain	CTP_transf_like	Cytidylyltransferase-like	4	4	4	4	4	4	4	4	4	3
PF01483	Family	P_proprotein	Proprotein convertase P-domain	4	4	3	4	4	4	4	4	4	4
PF01590	Domain	GAF	GAF domain	4	4	4	4	4	4	4	4	4	4
PF01979	Domain	Amidohydro_1	Amidohydrolase family	4	5	5	5	5	4	5	5	5	5
PF02146	Family	SIR2	Sir2 family	4	4	3	4	4	4	4	4	4	4
PF02171	Family	Piwi	Piwi domain	4	4	4	4	4	4	5	4	4	4
PF02188	Motif	GoLoco	GoLoco motif	4	4	4	4	4	4	4	3	4	3
PF02755	Disordered	RPEL	RPEL repeat	4	4	3	4	4	4	4	4	5	4
PF02786	Domain	CPSase_L_D2	Carbamoyl-phosphate synthase L chain, ATP binding domain	4	4	4	4	4	4	4	4	4	4
PF02845	Family	CUE	CUE domain	4	4	4	5	4	4	4	4	4	4
PF02854	Family	MIF4G	MIF4G domain	4	4	5	5	5	5	5	5	5	5
PF02864	Domain	STAT_bind	STAT protein, DNA binding domain	4	4	4	4	4	4	4	4	4	4
PF03166	Family	MH2	MH2 domain	4	4	5	5	4	4	5	4	4	4
PF03770	Family	IPK	Inositol polyphosphate kinase	4	4	4	4	4	4	4	4	4	4
PF03807	Family	F420_oxidored	NADP oxidoreductase coenzyme F420-dependent	4	4	4	4	3	4	4	4	4	4
PF03828	Family	PAP_assoc	Cid1 family poly A polymerase	4	5	4	4	4	4	4	3	4	4
PF04564	Domain	U-box	U-box domain	4	4	4	4	3	4	4	4	4	4
PF04732	Family	Filament_head	Intermediate filament head (DNA binding) region	4	4	4	4	4	4	4	4	4	4
PF04818	Family	CTD_bind	RNA polymerase II-binding domain.	4	4	5	4	4	4	4	4	4	4
PF05193	Domain	Peptidase_M16_C	Peptidase M16 inactive domain	4	4	4	4	4	4	4	4	4	4
PF05383	Domain	La	La domain	4	4	3	4	4	4	4	4	4	4
PF05649	Family	Peptidase_M13_N	Peptidase family M13	4	4	4	4	4	4	5	4	4	4
PF05679	Family	CHGN	Chondroitin N-acetylgalactosaminyltransferase	4	4	5	5	4	4	5	4	4	4
PF06839	Domain	zf-GRF	GRF zinc finger	4	4	3	4	3	4	4	4	4	4
PF07496	Domain	zf-CW	CW-type Zinc Finger	4	4	4	4	4	4	4	4	4	4
PF07738	Family	Sad1_UNC	Sad1 / UNC-like C-terminal	4	4	4	4	4	4	4	4	4	4
PF07894	Family	FAM83	FAM83 A-H	4	5	5	4	4	4	5	4	4	4
PF08344	Family	TRP_2	Transient receptor ion channel II	4	4	4	4	4	4	3	4	4	4
PF08423	Domain	Rad51	Rad51	4	4	4	3	4	4	4	4	4	4
PF08515	Family	TGF_beta_GS	Transforming growth factor beta type I GS-motif	4	4	3	4	4	4	4	4	4	4
PF08953	Domain	DUF1899	Domain of unknown function (DUF1899)	4	4	4	4	4	4	5	4	4	4
PF10409	Family	PTEN_C2	C2 domain of PTEN tumour-suppressor protein	4	4	4	4	4	4	5	4	3	4
PF11977	Domain	RNase_Zc3h12a	Zc3h12a-like Ribonuclease NYN domain	4	4	4	4	3	4	4	4	4	4
PF13415	Domain	Kelch_3	Galactose oxidase, central domain	4	4	5	4	4	4	4	4	4	4
PF13532	Domain	2OG-FeII_Oxy_2	2OG-Fe(II) oxygenase superfamily	4	4	4	4	4	4	3	3	4	4
PF13733	Domain	Glyco_transf_7N	N-terminal region of glycosyl transferase group 7	4	4	4	4	5	4	4	4	4	4
PF15711	Domain	ILEI	Interleukin-like EMT inducer	4	4	4	4	4	4	4	4	4	4
PF16178	Family	Anoct_dimer	Dimerisation domain of Ca+-activated chloride-channel, anoctamin	4	4	4	4	4	4	4	4	3	3
PF16207	Domain	RAWUL	RAWUL domain RING finger- and WD40-associated ubiquitin-like	4	4	4	4	4	5	5	4	4	4
PF16300	Repeat	WD40_4	Type of WD40 repeat	4	4	4	4	4	4	5	4	4	4
PF16905	Family	GPHH	Voltage-dependent L-type calcium channel, IQ-associated	4	4	4	3	4	5	4	4	4	4
PF00108	Domain	Thiolase_N	Thiolase, N-terminal domain	3	3	3	3	3	4	3	4	3	3
PF00133	Family	tRNA-synt_1	tRNA synthetases class I (I, L, M and V)	3	4	3	3	3	3	3	3	3	3
PF00180	Domain	Iso_dh	Isocitrate/isopropylmalate dehydrogenase	3	4	3	3	3	4	3	3	3	3
PF00258	Domain	Flavodoxin_1	Flavodoxin	3	4	4	4	4	4	5	4	4	4
PF00266	Domain	Aminotran_5	Aminotransferase class-V	3	4	3	4	3	3	3	3	3	3
PF00534	Family	Glycos_transf_1	Glycosyl transferases group 1	3	3	3	3	3	4	3	3	3	3
PF00587	Domain	tRNA-synt_2b	tRNA synthetase class II core domain (G, H, P, S and T)	3	4	4	4	4	4	4	4	4	4
PF00637	Family	Clathrin	Region in Clathrin and VPS	3	4	3	3	3	4	3	3	3	3
PF00667	Domain	FAD_binding_1	FAD binding domain	3	4	3	3	3	4	3	3	3	3
PF00675	Family	Peptidase_M16	Insulinase (Peptidase family M16)	3	4	3	3	3	4	3	3	3	3
PF00676	Family	E1_dh	Dehydrogenase E1 component	3	4	3	3	3	4	3	3	3	3
PF00679	Domain	EFG_C	Elongation factor G C-terminus	3	4	3	3	3	4	3	3	4	3
PF00755	Family	Carn_acyltransf	Choline/Carnitine o-acyltransferase	3	4	4	4	4	4	4	4	4	4
PF00794	Family	PI3K_rbd	PI3-kinase family, ras-binding domain	3	4	4	4	4	4	4	3	4	4
PF00801	Domain	PKD	PKD domain	3	4	4	4	4	4	3	4	4	3
PF00808	Domain	CBFD_NFYB_HMF	Histone-like transcription factor (CBF/NF-Y) and archaeal histone	3	4	4	4	4	3	4	4	4	4
PF00930	Family	DPPIV_N	Dipeptidyl peptidase IV (DPP IV) N-terminal region	3	4	3	3	3	4	3	3	3	3
PF00939	Family	Na_sulph_symp	Sodium:sulfate symporter transmembrane region	3	4	3	3	3	3	3	3	3	3
PF00962	Domain	A_deaminase	Adenosine/AMP deaminase	3	4	3	3	3	4	3	3	3	3
PF00989	Domain	PAS	PAS fold	3	4	3	3	3	3	4	4	3	3
PF01365	Family	RYDR_ITPR	RIH domain	3	4	3	3	3	4	3	3	3	3
PF01400	Domain	Astacin	Astacin (Peptidase family M12A)	3	4	3	3	3	4	3	3	3	3
PF01413	Domain	C4	C-terminal tandem repeated domain in type 4 procollagen	3	4	3	3	3	4	3	3	3	3
PF01417	Domain	ENTH	ENTH domain	3	3	3	3	3	4	3	3	3	3
PF01530	Family	zf-C2HC	Zinc finger, C2HC type	3	3	3	3	3	3	3	3	3	3
PF01805	Family	Surp	Surp module	3	4	3	3	3	4	3	3	3	3
PF01843	Family	DIL	DIL domain	3	4	3	3	3	4	3	3	3	3
PF01846	Family	FF	FF domain	3	3	4	3	4	3	3	3	3	3
PF02036	Family	SCP2	SCP-2 sterol transfer family	3	4	3	3	3	3	3	3	3	3
PF02187	Family	GAS2	Growth-Arrest-Specific Protein 2 Domain	3	3	3	3	3	4	3	3	3	3
PF02190	Family	LON_substr_bdg	ATP-dependent protease La (LON) substrate-binding domain	3	4	3	3	3	3	3	3	3	3
PF02207	Family	zf-UBR	Putative zinc finger in N-recognin (UBR box)	3	4	3	3	3	4	3	3	3	3
PF02437	Family	Ski_Sno	SKI/SNO/DAC family	3	4	4	4	3	4	4	4	4	4
PF02803	Domain	Thiolase_C	Thiolase, C-terminal domain	3	3	3	3	4	4	3	4	3	3
PF02816	Family	Alpha_kinase	Alpha-kinase family	3	2	3	3	3	4	3	3	3	3
PF02847	Family	MA3	MA3 domain	3	4	3	3	3	4	3	3	3	3
PF02852	Domain	Pyr_redox_dim	Pyridine nucleotide-disulphide oxidoreductase, dimerisation domain	3	2	3	3	3	3	3	3	3	3
PF02862	Family	DDHD	DDHD domain	3	3	3	3	4	4	3	3	3	3
PF02891	Domain	zf-MIZ	MIZ/SP-RING zinc finger	3	4	3	3	3	4	3	3	3	3
PF03127	Domain	GAT	GAT domain	3	4	3	3	3	4	3	3	3	3
PF03148	Family	Tektin	Tektin family	3	4	3	3	3	4	3	3	3	3
PF03451	Family	HELP	HELP motif	3	4	3	3	3	4	3	3	3	3
PF03725	Domain	RNase_PH_C	3' exoribonuclease family, domain 2	3	4	3	3	3	4	3	3	3	3
PF03736	Repeat	EPTP	EPTP domain	3	3	3	3	3	4	3	3	3	3
PF03815	Domain	LCCL	LCCL domain	3	3	3	3	3	4	3	3	3	3
PF03921	Domain	ICAM_N	Intercellular adhesion molecule (ICAM), N-terminal domain	3	3	3	3	3	4	3	3	3	4
PF04193	Repeat	PQ-loop	PQ loop repeat	3	3	3	3	3	3	3	3	3	3
PF04433	Domain	SWIRM	SWIRM domain	3	4	3	3	3	3	3	3	3	3
PF04727	Family	ELMO_CED12	ELMO/CED-12 family	3	4	3	3	3	4	3	3	3	3
PF04810	Domain	zf-Sec23_Sec24	Sec23/Sec24 zinc finger	3	4	3	3	3	3	3	3	3	3
PF04811	Domain	Sec23_trunk	Sec23/Sec24 trunk domain	3	3	3	3	3	4	3	3	3	3
PF04815	Domain	Sec23_helical	Sec23/Sec24 helical domain	3	4	3	3	4	4	3	3	3	3
PF04893	Domain	Yip1	Yip1 domain	3	3	3	3	3	4	3	4	3	4
PF05210	Family	Sprouty	Sprouty protein (Spry)	3	4	4	4	4	4	4	4	4	4
PF05653	Family	Mg_trans_NIPA	Magnesium transporter NIPA	3	3	3	3	3	3	3	3	3	3
PF06083	Family	IL17	Interleukin-17	3	3	3	3	3	4	3	3	3	2
PF06327	Family	DUF1053	Domain of Unknown Function (DUF1053)	3	4	3	3	3	4	3	3	3	3
PF06337	Domain	DUSP	DUSP domain	3	4	2	3	3	3	3	3	3	3
PF06467	Domain	zf-FCS	MYM-type Zinc finger with FCS sequence motif	3	4	3	3	4	3	3	3	3	3
PF06668	Family	ITI_HC_C	Inter-alpha-trypsin inhibitor heavy chain C-terminus	3	4	3	3	3	3	3	3	3	3
PF06743	Family	FAST_1	FAST kinase-like protein, subdomain 1	3	4	3	3	3	4	3	3	3	3
PF07534	Domain	TLD	TLD	3	4	3	3	3	3	3	3	3	2
PF07646	Repeat	Kelch_2	Kelch motif	3	3	2	3	3	3	3	3	3	3
PF07742	Family	BTG	BTG family	3	4	3	3	3	4	3	4	3	3
PF07744	Domain	SPOC	SPOC domain	3	4	3	3	3	4	3	3	3	4
PF08022	Domain	FAD_binding_8	FAD-binding domain	3	3	3	3	3	3	4	3	4	4
PF08033	Domain	Sec23_BS	Sec23/Sec24 beta-sandwich domain	3	4	3	3	4	4	3	3	3	3
PF08150	Domain	FerB	FerB (NUC096) domain	3	4	3	3	3	2	3	3	3	3
PF08264	Domain	Anticodon_1	Anticodon-binding domain of tRNA	3	4	3	3	3	4	3	3	3	3
PF08373	Domain	RAP	RAP domain	3	4	3	3	3	4	3	3	3	3
PF08389	Family	Xpo1	Exportin 1-like protein	3	4	4	3	3	4	3	3	3	3
PF08454	Family	RIH_assoc	RyR and IP3R Homology associated	3	4	3	3	3	3	3	3	3	3
PF08699	Domain	ArgoL1	Argonaute linker 1 domain	3	4	3	3	3	4	3	3	3	4
PF08709	Domain	Ins145_P3_rec	Inositol 1,4,5-trisphosphate/ryanodine receptor	3	4	3	3	3	4	3	3	3	3
PF08725	Domain	Integrin_b_cyt	Integrin beta cytoplasmic domain	3	4	3	3	3	4	3	3	3	3
PF08726	Domain	EFhand_Ca_insen	Ca2+ insensitive EF hand	3	4	3	3	3	4	3	3	3	3
PF09067	Domain	EpoR_lig-bind	Erythropoietin receptor, ligand binding	3	4	3	3	3	4	3	3	3	3
PF09068	Domain	EF-hand_2	EF hand	3	4	3	3	4	4	3	3	3	3
PF09069	Domain	EF-hand_3	EF-hand	3	4	3	3	4	4	3	3	3	3
PF09457	Motif	RBD-FIP	FIP domain	3	4	3	3	3	4	3	3	3	3
PF10557	Domain	Cullin_Nedd8	Cullin protein neddylation domain	3	4	3	3	3	4	3	4	3	3
PF10591	Domain	SPARC_Ca_bdg	Secreted protein acidic and rich in cysteine Ca binding region	3	3	3	4	3	3	3	3	3	2
PF10607	Domain	CLTH	CTLH/CRA C-terminal to LisH motif domain	3	4	3	3	3	4	3	3	3	3
PF11933	Family	Na_trans_cytopl	Cytoplasmic domain of voltage-gated Na+ ion channel	3	4	3	3	3	4	3	3	3	3
PF11971	Domain	CAMSAP_CH	CAMSAP CH domain	3	3	3	3	3	3	3	3	4	3
PF12417	Family	DUF3669	Zinc finger protein	3	2	3	3	3	3	3	3	3	3
PF12473	Family	DUF3694	Kinesin protein	3	4	3	3	3	4	3	3	3	3
PF13229	Family	Beta_helix	Right handed beta helix region	3	4	3	3	3	4	3	3	3	3
PF13908	Family	Shisa	Wnt and FGF inhibitory regulator	3	4	4	3	4	4	4	4	4	4
PF14551	Domain	MCM_N	MCM N-terminal domain	3	4	3	3	3	2	3	3	3	3
PF14798	Family	Ca_hom_mod	Calcium homeostasis modulator	3	4	3	3	3	4	3	3	3	3
PF16421	Domain	E2F_CC-MB	E2F transcription factor CC-MB domain	3	4	3	3	3	3	3	3	3	3
PF16470	Domain	S8_pro-domain	Peptidase S8 pro-domain	3	4	4	4	3	4	4	4	4	4
PF00006	Domain	ATP-synt_ab	ATP synthase alpha/beta family, nucleotide-binding domain	3	3	3	3	3	2	3	3	3	3
PF00066	Domain	Notch	LNR domain	3	4	3	3	3	4	3	3	3	3
PF00117	Domain	GATase	Glutamine amidotransferase class-I	3	4	3	3	3	3	3	3	3	3
PF00202	Domain	Aminotran_3	Aminotransferase class-III	3	3	3	3	3	3	3	3	3	3
PF00287	Family	Na_K-ATPase	Sodium / potassium ATPase beta chain	3	3	3	3	4	3	3	3	3	2
PF00289	Domain	Biotin_carb_N	Biotin carboxylase, N-terminal domain	3	3	3	3	3	3	3	3	3	3
PF00349	Domain	Hexokinase_1	Hexokinase	3	3	3	3	3	4	3	3	3	3
PF00402	Repeat	Calponin	Calponin family repeat	3	3	3	3	4	4	3	3	3	4
PF00458	Domain	WHEP-TRS	WHEP-TRS domain	3	2	3	2	3	3	3	3	3	2
PF00488	Domain	MutS_V	MutS domain V	3	3	3	3	3	3	3	3	3	3
PF00635	Domain	Motile_Sperm	MSP (Major sperm protein) domain	3	3	3	3	3	3	3	3	3	3
PF00778	Family	DIX	DIX domain	3	4	3	3	3	4	3	3	3	3
PF00795	Family	CN_hydrolase	Carbon-nitrogen hydrolase	3	4	3	3	3	4	3	3	3	3
PF00880	Repeat	Nebulin	Nebulin repeat	3	3	2	2	2	3	2	2	2	2
PF00970	Domain	FAD_binding_6	Oxidoreductase FAD-binding domain	3	3	3	3	2	3	3	3	3	3
PF01061	Family	ABC2_membrane	ABC-2 type transporter	3	3	3	3	2	3	3	3	3	3
PF01066	Family	CDP-OH_P_transf	CDP-alcohol phosphatidyltransferase	3	3	2	3	3	2	2	3	3	3
PF01179	Domain	Cu_amine_oxid	Copper amine oxidase, enzyme domain	3	2	2	2	2	2	2	3	2	3
PF01186	Family	Lysyl_oxidase	Lysyl oxidase	3	3	3	3	3	3	3	3	3	3
PF01299	Family	Lamp	Lysosome-associated membrane glycoprotein (Lamp)	3	2	3	3	3	3	3	3	3	3
PF01301	Domain	Glyco_hydro_35	Glycosyl hydrolases family 35	3	3	3	3	3	3	2	3	2	3
PF01459	Family	Porin_3	Eukaryotic porin	3	3	3	3	3	3	3	3	3	3
PF01480	Family	PWI	PWI domain	3	3	3	3	3	3	3	3	3	3
PF01546	Family	Peptidase_M20	Peptidase family M20/M25/M40	3	2	3	2	3	2	3	3	3	3
PF01565	Domain	FAD_binding_4	FAD binding domain	3	3	3	3	2	3	2	3	3	3
PF01603	Family	B56	Protein phosphatase 2A regulatory B subunit (B56 family)	3	3	3	2	3	3	3	3	3	3
PF01728	Family	FtsJ	FtsJ-like methyltransferase	3	3	3	3	3	4	3	3	3	3
PF01754	Family	zf-A20	A20-like zinc finger	3	4	4	3	4	3	4	4	4	4
PF01758	Family	SBF	Sodium Bile acid symporter family	3	4	3	3	3	4	3	3	3	4
PF02017	Domain	CIDE-N	CIDE-N domain	3	3	3	3	2	3	3	3	3	3
PF02020	Family	W2	eIF4-gamma/eIF5/eIF2-epsilon	3	4	4	4	4	4	4	4	4	4
PF02121	Family	IP_trans	Phosphatidylinositol transfer protein	3	3	2	3	3	3	3	3	3	3
PF02137	Family	A_deamin	Adenosine-deaminase (editase) domain	3	4	3	3	3	4	3	3	3	3
PF02149	Domain	KA1	Kinase associated domain 1	3	3	2	3	3	3	3	3	3	2
PF02176	Family	zf-TRAF	TRAF-type zinc finger	3	4	3	3	3	2	3	3	3	3
PF02185	Family	HR1	Hr1 repeat	3	3	3	3	3	3	3	3	3	3
PF02201	Domain	SWIB	SWIB/MDM2 domain	3	3	3	3	3	4	3	3	3	3
PF02259	Family	FAT	FAT domain	3	3	3	3	3	3	3	3	3	3
PF02260	Family	FATC	FATC domain	3	3	3	3	3	3	3	3	3	3
PF02351	Domain	GDNF	GDNF/GAS1 domain	3	4	3	3	3	4	3	3	3	3
PF02383	Family	Syja_N	SacI homology domain	3	3	2	3	3	2	3	3	3	3
PF02412	Repeat	TSP_3	Thrombospondin type 3 repeat	3	3	3	3	3	3	3	3	3	3
PF02460	Family	Patched	Patched family	3	2	2	3	2	2	2	2	2	3
PF02690	Family	Na_Pi_cotrans	Na+/Pi-cotransporter	3	2	2	2	2	2	2	2	2	2
PF02782	Domain	FGGY_C	FGGY family of carbohydrate kinases, C-terminal domain	3	3	3	3	3	3	3	3	3	3
PF02785	Domain	Biotin_carb_C	Biotin carboxylase C-terminal domain	3	3	3	3	3	3	3	3	3	3
PF02826	Domain	2-Hacid_dh_C	D-isomer specific 2-hydroxyacid dehydrogenase, NAD binding domain	3	3	3	3	3	3	2	2	3	3
PF03045	Domain	DAN	DAN domain	3	3	3	3	3	3	3	3	3	2
PF03188	Family	Cytochrom_B561	Eukaryotic cytochrome b561	3	3	3	3	3	3	3	3	3	3
PF03250	Family	Tropomodulin	Tropomodulin	3	3	2	3	3	3	3	3	3	3
PF03256	Family	ANAPC10	Anaphase-promoting complex, subunit 10 (APC10)	3	4	3	3	3	4	3	3	3	3
PF03348	Family	Serinc	Serine incorporator (Serinc)	3	3	3	3	3	3	3	3	3	3
PF03351	Domain	DOMON	DOMON domain	3	3	3	3	3	2	2	3	3	3
PF03727	Domain	Hexokinase_2	Hexokinase	3	3	3	3	3	4	3	3	3	3
PF04051	Family	TRAPP	Transport protein particle (TRAPP) component	3	2	3	3	3	2	3	3	2	3
PF04130	Family	GCP_C_terminal	Gamma tubulin complex component C-terminal	3	3	3	3	3	3	3	3	3	3
PF04142	Family	Nuc_sug_transp	Nucleotide-sugar transporter	3	3	2	3	3	3	3	3	3	3
PF04144	Family	SCAMP	SCAMP family	3	3	3	3	3	3	3	3	3	2
PF04146	Domain	YTH	YT521-B-like domain	3	3	3	3	3	3	3	3	3	3
PF04258	Family	Peptidase_A22B	Signal peptide peptidase	3	3	3	3	3	3	3	3	3	3
PF04300	Family	FBA	F-box associated region	3	4	3	3	3	4	3	3	3	4
PF04438	Domain	zf-HIT	HIT zinc finger	3	4	3	3	4	4	3	3	3	3
PF04515	Family	Choline_transpo	Plasma-membrane choline transporter	3	3	3	3	3	3	3	3	3	3
PF04857	Family	CAF1	CAF1 family ribonuclease	3	3	2	3	3	3	3	3	3	3
PF05186	Motif	Dpy-30	Dpy-30 motif	3	3	3	3	3	3	3	3	3	2
PF05192	Domain	MutS_III	MutS domain III	3	3	3	3	3	3	3	3	3	3
PF05622	Family	HOOK	HOOK protein	3	3	3	3	3	2	3	3	3	2
PF05735	Family	TSP_C	Thrombospondin C-terminal region	3	3	3	3	3	3	3	3	3	3
PF05964	Family	FYRN	F/Y-rich N-terminus	3	3	3	3	3	3	3	3	3	3
PF06031	Motif	SERTA	SERTA motif	3	3	3	3	3	3	3	3	3	3
PF06119	Family	NIDO	Nidogen-like	3	3	3	3	3	3	3	3	3	3
PF06297	Domain	PET	PET Domain	3	3	3	3	2	3	3	3	3	3
PF06309	Family	Torsin	Torsin	3	3	3	3	3	3	3	3	3	3
PF06456	Domain	Arfaptin	Arfaptin-like domain	3	3	3	3	3	3	3	3	3	3
PF07531	Family	TAFH	NHR1 homology to TAF	3	3	3	3	3	3	3	3	3	3
PF07533	Domain	BRK	BRK domain	3	3	3	3	3	3	3	3	3	3
PF07687	Domain	M20_dimer	Peptidase dimerisation domain	3	3	2	3	3	2	3	3	3	3
PF07965	Domain	Integrin_B_tail	Integrin beta tail domain	3	4	3	3	3	4	3	3	4	3
PF08238	Repeat	Sel1	Sel1 repeat	3	4	3	3	3	3	3	3	3	3
PF08357	Family	SEFIR	SEFIR domain	3	4	3	3	3	3	3	3	3	3
PF08368	Family	FAST_2	FAST kinase-like protein, subdomain 2	3	3	3	3	3	3	3	3	3	3
PF08397	Family	IMD	IRSp53/MIM homology domain	3	3	3	3	3	3	3	3	3	3
PF08399	Family	VWA_N	VWA N-terminal	3	3	3	2	3	3	3	3	3	3
PF08477	Domain	Roc	Ras of Complex, Roc, domain of DAPkinase	3	2	3	3	3	3	3	3	3	3
PF08513	Domain	LisH	LisH	3	3	3	3	3	3	4	3	3	3
PF08669	Domain	GCV_T_C	Glycine cleavage T-protein C-terminal barrel domain	3	3	2	3	3	2	3	3	3	3
PF09258	Domain	Glyco_transf_64	Glycosyl transferase family 64 domain	3	3	3	3	3	3	3	3	3	3
PF09289	Domain	FOLN	Follistatin/Osteonectin-like EGF domain	3	3	3	2	2	2	3	3	3	3
PF10277	Family	Frag1	Frag1/DRAM/Sfk1 family	3	3	3	3	4	4	3	3	3	3
PF10436	Family	BCDHK_Adom3	Mitochondrial branched-chain alpha-ketoacid dehydrogenase kinase	3	3	3	3	3	3	3	3	3	3
PF11938	Family	DUF3456	TLR4 regulator and MIR-interacting MSAP	3	3	3	3	2	3	3	3	2	2
PF12140	Domain	SLED	SLED domain	3	3	3	3	3	3	3	3	3	3
PF12260	Family	PIP49_C	Protein-kinase domain of FAM69	3	4	3	3	3	4	3	3	3	3
PF12349	Family	Sterol-sensing	Sterol-sensing domain of SREBP cleavage-activation	3	3	3	3	3	4	3	4	3	3
PF12534	Family	Pannexin_like	Pannexin-like TM region of LRRC8	3	3	3	3	3	3	3	3	3	3
PF12895	Domain	ANAPC3	Anaphase-promoting complex, cyclosome, subunit 3	3	2	2	3	3	2	3	3	3	3
PF12998	Domain	ING	Inhibitor of growth proteins N-terminal histone-binding	3	3	3	3	4	3	3	3	3	3
PF13513	Repeat	HEAT_EZ	HEAT-like repeat	3	3	3	3	3	3	2	3	2	2
PF13540	Repeat	RCC1_2	Regulator of chromosome condensation (RCC1) repeat	3	2	2	2	2	3	2	2	2	2
PF13774	Domain	Longin	Regulated-SNARE-like domain	3	3	3	3	3	3	4	3	3	3
PF13868	Family	TPH	Trichohyalin-plectin-homology domain	3	2	3	3	3	3	3	3	3	3
PF13873	Domain	Myb_DNA-bind_5	Myb/SANT-like DNA-binding domain	3	4	3	3	3	3	4	3	3	3
PF13893	Domain	RRM_5	RNA recognition motif. (a.k.a. RRM, RBD, or RNP domain)	3	3	3	3	3	4	3	3	3	3
PF13901	Domain	zf-RING_9	Putative zinc-RING and/or ribbon	3	3	3	3	2	3	2	3	3	3
PF13913	Domain	zf-C2HC_2	zinc-finger of a C2HC-type	3	2	2	2	2	2	3	3	2	2
PF14492	Domain	EFG_II	Elongation Factor G, domain II	3	3	3	3	3	3	3	3	3	3
PF14844	Domain	PH_BEACH	PH domain associated with Beige/BEACH	3	3	3	3	3	2	3	3	3	3
PF14957	Family	BORG_CEP	Cdc42 effector	3	2	2	3	3	2	2	2	2	2
PF15706	Family	TMEM132D_C	Mature oligodendrocyte transmembrane protein, TMEM132D, C-term	3	3	3	3	3	3	3	3	3	3
PF15902	Domain	Sortilin-Vps10	Sortilin, neurotensin receptor 3,	3	3	3	3	3	3	3	3	3	3
PF15936	Family	DUF4749	Domain of unknown function (DUF4749)	3	3	3	3	3	2	3	3	3	3
PF16070	Family	TMEM132	Transmembrane protein family 132	3	3	3	3	3	2	3	3	3	3
PF16076	Family	Acyltransf_C	Acyltransferase C-terminus	3	3	3	3	3	2	3	3	3	3
PF16172	Family	DOCK_N	DOCK N-terminus	3	3	3	3	3	2	3	3	3	3
PF00123	Family	Hormone_2	Peptide hormone	2	3	3	3	3	4	3	3	3	3
PF00132	Repeat	Hexapep	Bacterial transferase hexapeptide (six repeats)	2	2	2	2	2	2	3	2	2	2
PF00156	Domain	Pribosyltran	Phosphoribosyl transferase domain	2	2	2	2	2	2	2	2	2	3
PF00198	Domain	2-oxoacid_dh	2-oxoacid dehydrogenases acyltransferase (catalytic domain)	2	2	2	2	2	2	2	2	2	2
PF00243	Domain	NGF	Nerve growth factor family	2	2	2	2	2	2	2	2	2	2
PF00261	Coiled-coil	Tropomyosin	Tropomyosin	2	2	3	2	3	2	2	2	2	3
PF00288	Family	GHMP_kinases_N	GHMP kinases N terminal domain	2	3	3	3	3	2	2	3	3	3
PF00291	Family	PALP	Pyridoxal-phosphate dependent enzyme	2	2	3	3	3	2	3	3	3	3
PF00319	Domain	SRF-TF	SRF-type transcription factor (DNA-binding and dimerisation domain)	2	3	3	3	3	3	3	3	3	3
PF00348	Domain	polyprenyl_synt	Polyprenyl synthetase	2	2	2	2	3	3	2	2	2	2
PF00355	Domain	Rieske	Rieske [2Fe-2S] domain	2	2	2	2	2	1	2	2	2	2
PF00405	Domain	Transferrin	Transferrin	2	2	2	2	2	2	2	2	2	2
PF00450	Domain	Peptidase_S10	Serine carboxypeptidase	2	2	2	2	2	2	2	2	2	2
PF00459	Family	Inositol_P	Inositol monophosphatase family	2	3	3	3	3	3	3	3	3	3
PF00472	Family	RF-1	RF-1 domain	2	2	2	2	2	2	2	2	2	2
PF00473	Family	CRF	Corticotropin-releasing factor family	2	2	2	2	2	2	2	2	2	2
PF00478	Domain	IMPDH	IMP dehydrogenase / GMP reductase domain	2	2	2	2	2	2	2	2	2	2
PF00549	Domain	Ligase_CoA	CoA-ligase	2	2	3	2	2	2	2	2	2	2
PF00550	Domain	PP-binding	Phosphopantetheine attachment site	2	2	2	2	2	2	2	2	2	2
PF00579	Family	tRNA-synt_1b	tRNA synthetases class I (W and Y)	2	2	2	2	2	2	2	2	2	2
PF00596	Domain	Aldolase_II	Class II Aldolase and Adducin N-terminal domain	2	2	2	2	2	2	2	2	2	2
PF00614	Family	PLDc	Phospholipase D Active site motif	2	2	2	2	2	2	2	2	2	2
PF00684	Domain	DnaJ_CXXCXGXG	DnaJ central domain	2	2	2	2	2	3	2	2	3	2
PF00717	Domain	Peptidase_S24	Peptidase S24-like	2	2	2	2	2	2	2	2	2	2
PF00725	Domain	3HCDH	3-hydroxyacyl-CoA dehydrogenase, C-terminal domain	2	2	2	2	2	2	2	2	2	2
PF00763	Domain	THF_DHG_CYH	Tetrahydrofolate dehydrogenase/cyclohydrolase, catalytic domain	2	2	2	2	2	2	2	2	2	2
PF00769	Family	ERM	Ezrin/radixin/moesin family	2	2	2	2	2	2	2	2	2	2
PF00773	Domain	RNB	RNB domain	2	2	2	2	2	2	2	2	2	2
PF00817	Family	IMS	impB/mucB/samB family	2	2	2	2	3	2	2	2	2	2
PF00836	Family	Stathmin	Stathmin family	2	2	2	3	3	2	2	2	2	2
PF00849	Family	PseudoU_synth_2	RNA pseudouridylate synthase	2	2	2	2	2	2	2	2	2	2
PF00854	Family	PTR2	POT family	2	2	3	3	3	3	3	3	3	3
PF00859	Family	CTF_NFI	CTF/NF-I family transcription modulation region	2	2	2	2	2	2	2	2	2	2
PF00867	Family	XPG_I	XPG I-region	2	2	2	2	2	2	3	2	2	2
PF00909	Family	Ammonium_transp	Ammonium Transporter Family	2	2	2	2	2	2	3	2	2	2
PF00917	Domain	MATH	MATH domain	2	2	2	2	3	2	2	3	2	2
PF00932	Domain	LTD	Lamin Tail Domain	2	2	2	2	2	3	3	3	2	2
PF00965	Domain	TIMP	Tissue inhibitor of metalloproteinase	2	2	2	2	2	2	2	2	3	3
PF00996	Family	GDI	GDP dissociation inhibitor	2	2	2	2	2	2	2	2	2	2
PF01008	Family	IF-2B	Initiation factor 2 subunit family	2	2	2	3	2	2	2	2	2	2
PF01039	Family	Carboxyl_trans	Carboxyl transferase domain	2	2	2	2	2	2	2	2	2	2
PF01044	Family	Vinculin	Vinculin family	2	2	2	2	2	2	2	3	2	2
PF01062	Family	Bestrophin	Bestrophin, RFP-TM, chloride channel	2	2	2	2	2	2	2	2	2	2
PF01082	Domain	Cu2_monooxygen	Copper type II ascorbate-dependent monooxygenase, N-terminal domain	2	2	2	2	2	2	2	2	2	2
PF01088	Domain	Peptidase_C12	Ubiquitin carboxyl-terminal hydrolase, family 1	2	2	2	2	3	2	2	3	3	2
PF01119	Family	DNA_mis_repair	DNA mismatch repair protein, C-terminal domain	2	2	2	2	2	2	2	2	2	2
PF01166	Family	TSC22	TSC-22/dip/bun family	2	2	2	2	2	2	2	2	2	2
PF01167	Domain	Tub	Tub family	2	2	2	2	2	2	2	2	2	2
PF01182	Domain	Glucosamine_iso	Glucosamine-6-phosphate isomerases/6-phosphogluconolactonase	2	3	2	2	3	2	2	2	2	2
PF01207	Family	Dus	Dihydrouridine synthase (Dus)	2	2	2	2	2	2	2	2	2	2
PF01393	Domain	Chromo_shadow	Chromo shadow domain	2	2	2	2	2	2	2	2	2	2
PF01408	Family	GFO_IDH_MocA	Oxidoreductase family, NAD-binding Rossmann fold	2	2	2	2	2	2	2	2	2	2
PF01414	Domain	DSL	Delta serrate ligand	2	2	2	2	2	2	2	2	2	2
PF01434	Family	Peptidase_M41	Peptidase family M41	2	2	2	2	2	2	2	2	2	2
PF01442	Domain	Apolipoprotein	Apolipoprotein A1/A4/E domain	2	2	2	2	2	2	2	2	2	3
PF01496	Family	V_ATPase_I	V-type ATPase 116kDa subunit family	2	2	2	2	2	2	2	2	2	2
PF01510	Domain	Amidase_2	N-acetylmuramoyl-L-alanine amidase	2	3	2	2	3	2	2	2	3	2
PF01586	Family	Basic	Myogenic Basic domain	2	2	2	2	2	2	2	2	2	2
PF01591	Domain	6PF2K	6-phosphofructo-2-kinase	2	2	2	2	2	2	2	2	2	2
PF01608	Family	I_LWEQ	I/LWEQ domain	2	2	2	2	2	2	2	2	2	2
PF01633	Family	Choline_kinase	Choline/ethanolamine kinase	2	2	2	2	2	2	2	2	2	2
PF01652	Domain	IF4E	Eukaryotic initiation factor 4E	2	2	2	3	2	3	2	2	2	2
PF01712	Domain	dNK	Deoxynucleoside kinase	2	2	2	2	2	2	2	2	2	2
PF01733	Family	Nucleoside_tran	Nucleoside transporter	2	2	2	2	2	2	2	2	2	2
PF01751	Family	Toprim	Toprim domain	2	2	2	2	2	2	2	2	2	2
PF01822	Domain	WSC	WSC domain	2	3	3	3	3	3	3	3	3	3
PF01853	Family	MOZ_SAS	MOZ/SAS family	2	3	3	3	3	3	3	3	3	3
PF02010	Family	REJ	REJ domain	2	2	2	2	2	2	2	3	2	3
PF02114	Domain	Phosducin	Phosducin	2	2	2	2	2	2	2	2	2	2
PF02173	Family	pKID	pKID domain	2	2	2	2	1	2	2	2	2	2
PF02179	Family	BAG	BAG domain	2	2	2	2	3	2	2	2	2	3
PF02301	Domain	HORMA	HORMA domain	2	2	2	2	2	1	2	2	2	2
PF02434	Family	Fringe	Fringe-like	2	2	3	3	3	3	3	3	3	2
PF02453	Family	Reticulon	Reticulon	2	2	2	2	3	3	2	2	2	2
PF02469	Domain	Fasciclin	Fasciclin domain	2	2	2	2	2	2	2	2	2	2
PF02728	Domain	Cu_amine_oxidN3	Copper amine oxidase, N3 domain	2	2	2	2	2	2	2	3	2	3
PF02737	Domain	3HCDH_N	3-hydroxyacyl-CoA dehydrogenase, NAD binding domain	2	2	2	2	2	2	2	2	2	2
PF02769	Domain	AIRS_C	AIR synthase related protein, C-terminal domain	2	2	3	2	2	2	2	2	2	2
PF02780	Domain	Transketolase_C	Transketolase, C-terminal domain	2	3	3	3	2	2	3	3	3	3
PF02784	Domain	Orn_Arg_deC_N	Pyridoxal-dependent decarboxylase, pyridoxal binding domain	2	2	2	2	3	2	2	2	2	2
PF02791	Family	DDT	DDT domain	2	2	2	2	2	2	2	2	2	2
PF02807	Domain	ATP-gua_PtransN	ATP:guanido phosphotransferase, N-terminal domain	2	2	2	2	2	2	3	2	2	2
PF02824	Family	TGS	TGS domain	2	3	3	3	3	2	2	3	3	3
PF02874	Domain	ATP-synt_ab_N	ATP synthase alpha/beta family, beta-barrel domain	2	2	3	3	3	3	3	3	3	3
PF02879	Domain	PGM_PMM_II	Phosphoglucomutase/phosphomannomutase, alpha/beta/alpha domain II	2	2	2	2	3	2	2	2	2	2
PF02880	Domain	PGM_PMM_III	Phosphoglucomutase/phosphomannomutase, alpha/beta/alpha domain III	2	2	2	2	2	2	2	2	2	2
PF02888	Family	CaMBD	Calmodulin binding domain	2	2	2	2	2	2	2	2	2	2
PF02889	Family	Sec63	Sec63 Brl domain	2	2	2	2	2	2	2	2	2	2
PF02928	Domain	zf-C5HC2	C5HC2 zinc finger	2	2	3	2	2	2	3	3	2	2
PF02990	Family	EMP70	Endomembrane protein 70	2	2	2	2	2	2	2	3	3	3
PF03016	Family	Exostosin	Exostosin family	2	2	2	2	2	2	2	2	2	2
PF03036	Family	Perilipin	Perilipin family	2	3	3	2	2	2	2	3	2	2
PF03096	Domain	Ndr	Ndr family	2	2	3	2	2	2	2	2	2	2
PF03097	Domain	BRO1	BRO1-like domain	2	3	2	3	3	3	2	3	3	3
PF03104	Family	DNA_pol_B_exo1	DNA polymerase family B, exonuclease domain	2	2	2	2	2	2	2	2	2	2
PF03109	Family	ABC1	ABC1 family	2	3	3	3	3	3	3	3	3	3
PF03134	Family	TB2_DP1_HVA22	TB2/DP1, HVA22 family	2	3	3	3	3	4	3	3	3	3
PF03185	Family	CaKB	Calcium-activated potassium channel, beta subunit	2	2	2	2	2	2	2	2	2	2
PF03299	Family	TF_AP-2	Transcription factor AP-2	2	2	3	3	3	3	3	3	3	3
PF03311	Family	Cornichon	Cornichon protein	2	2	2	2	2	2	2	2	2	2
PF03359	Family	GKAP	Guanylate-kinase-associated protein (GKAP) protein	2	2	3	2	3	2	2	2	2	2
PF03388	Domain	Lectin_leg-like	Legume-like lectin family	2	2	2	2	2	2	2	2	2	2
PF03416	Family	Peptidase_C54	Peptidase family C54	2	2	2	2	2	2	2	2	2	2
PF03520	Family	KCNQ_channel	KCNQ voltage-gated potassium channel	2	3	3	3	3	3	3	3	3	3
PF03556	Family	Cullin_binding	Cullin binding	2	3	3	3	2	3	3	3	3	3
PF03619	Family	Solute_trans_a	Organic solute transporter Ostalpha	2	2	2	2	2	2	2	2	2	2
PF03630	Family	Fumble	Fumble	2	2	2	2	2	2	2	2	2	2
PF03712	Domain	Cu2_monoox_C	Copper type II ascorbate-dependent monooxygenase, C-terminal domain	2	2	2	2	2	2	2	2	2	2
PF03764	Domain	EFG_IV	Elongation factor G, domain IV	2	2	2	2	2	2	2	2	3	2
PF03820	Family	Mtc	Tricarboxylate carrier	2	3	3	3	3	3	3	3	3	3
PF03901	Family	Glyco_transf_22	Alg9-like mannosyltransferase family	2	2	2	2	2	2	2	2	2	2
PF03952	Domain	Enolase_N	Enolase, N-terminal domain	2	2	2	2	3	2	2	3	2	2
PF03954	Family	Lectin_N	Hepatic lectin, N-terminal domain	2	2	1	2	2	1	2	2	2	2
PF04000	Family	Sas10_Utp3	Sas10/Utp3/C1D family	2	2	2	2	2	2	2	2	2	2
PF04117	Family	Mpv17_PMP22	Mpv17 / PMP22 family	2	2	2	2	2	2	2	2	2	3
PF04178	Family	Got1	Got1/Sft2-like family	2	2	3	3	3	2	3	3	3	3
PF04382	Domain	SAB	SAB domain	2	2	2	2	2	2	2	2	2	2
PF04387	Family	PTPLA	Protein tyrosine phosphatase-like protein, PTPLA	2	2	2	2	2	2	2	2	2	2
PF04434	Domain	SWIM	SWIM zinc finger	2	2	2	2	2	2	2	2	2	2
PF04617	Family	Hox9_act	Hox9 activation region	2	2	2	2	2	2	2	2	2	2
PF04670	Domain	Gtr1_RagA	Gtr1/RagA G protein conserved region	2	2	2	2	2	2	2	2	2	3
PF04706	Family	Dickkopf_N	Dickkopf N-terminal cysteine-rich region	2	2	2	2	2	2	2	2	2	2
PF04790	Family	Sarcoglycan_1	Sarcoglycan complex subunit protein	2	2	2	2	2	2	2	2	2	2
PF04851	Family	ResIII	Type III restriction enzyme, res subunit	2	3	3	3	2	3	3	3	3	2
PF05110	Family	AF-4	AF-4 proto-oncoprotein	2	2	2	2	2	2	2	2	2	2
PF05188	Domain	MutS_II	MutS domain II	2	2	2	2	2	2	2	2	2	2
PF05190	Domain	MutS_IV	MutS family domain IV	2	2	2	2	2	2	2	2	2	2
PF05361	Family	PP1_inhibitor	PKC-activated protein phosphatase-1 inhibitor	2	2	2	2	2	2	2	2	2	3
PF05527	Family	DUF758	Domain of unknown function (DUF758)	2	2	2	3	3	2	2	2	2	2
PF05640	Family	NKAIN	Na,K-Atpase Interacting protein	2	2	2	2	2	2	2	2	2	2
PF05761	Family	5_nucleotid	5' nucleotidase family	2	2	2	2	2	2	3	2	3	3
PF05794	Family	Tcp11	T-complex protein 11	2	2	2	2	2	2	3	2	2	2
PF05835	Family	Synaphin	Synaphin protein	2	2	2	2	2	2	2	2	2	2
PF05902	Domain	4_1_CTD	4.1 protein C-terminal domain (CTD)	2	2	2	2	2	2	2	2	2	2
PF05965	Family	FYRC	F/Y rich C-terminus	2	3	3	3	3	3	3	3	3	3
PF06008	Family	Laminin_I	Laminin Domain I	2	2	3	3	3	3	3	3	3	3
PF06009	Coiled-coil	Laminin_II	Laminin Domain II	2	3	3	3	3	3	3	3	3	3
PF06140	Family	Ifi-6-16	Interferon-induced 6-16 family	2	2	2	2	2	2	2	2	2	3
PF06292	Domain	DUF1041	Domain of Unknown Function (DUF1041)	2	3	3	3	2	3	3	3	3	3
PF06472	Family	ABC_membrane_2	ABC transporter transmembrane region 2	2	2	2	2	2	2	2	2	3	2
PF06484	Family	Ten_N	Teneurin Intracellular Region	2	2	2	2	2	2	2	2	2	2
PF06522	Family	B12D	NADH-ubiquinone reductase complex 1 MLRQ subunit	2	2	2	2	3	2	2	2	2	2
PF06701	Domain	MIB_HERC2	Mib_herc2	2	2	2	2	2	2	2	2	2	2
PF06733	Family	DEAD_2	DEAD_2	2	2	2	2	2	2	2	2	2	2
PF06814	Family	Lung_7-TM_R	Lung seven transmembrane receptor	2	2	2	2	2	2	2	2	2	2
PF06818	Coiled-coil	Fez1	Fez1	2	2	2	2	2	2	2	2	2	2
PF07092	Family	DUF1356	Protein of unknown function (DUF1356)	2	2	2	2	2	2	2	2	2	2
PF07177	Domain	Neuralized	Neuralized	2	3	3	3	3	2	3	3	3	3
PF07474	Domain	G2F	G2F domain	2	2	2	2	2	2	2	2	2	2
PF07529	Domain	HSA	HSA	2	2	2	2	2	2	2	2	2	2
PF07651	Domain	ANTH	ANTH domain	2	3	2	2	2	2	2	2	3	2
PF07700	Domain	HNOB	Haem-NO-binding	2	1	2	2	2	1	2	2	2	2
PF07701	Domain	HNOBA	Heme NO binding associated	2	2	2	2	2	2	2	2	2	2
PF07731	Domain	Cu-oxidase_2	Multicopper oxidase	2	2	2	2	2	2	2	2	2	3
PF07978	Domain	NIPSNAP	NIPSNAP	2	2	2	2	2	2	2	2	2	2
PF07984	Domain	NTP_transf_7	Nucleotidyltransferase	2	2	2	2	2	2	2	2	2	2
PF08059	Domain	SEP	SEP domain	2	2	2	2	3	2	2	2	2	2
PF08332	Domain	CaMKII_AD	Calcium/calmodulin dependent protein kinase II association domain	2	2	2	2	3	2	2	2	2	2
PF08366	Family	LLGL	LLGL2	2	2	2	2	2	2	2	2	2	2
PF08409	Family	DUF1736	Domain of unknown function (DUF1736)	2	2	2	2	2	2	2	2	2	2
PF08449	Family	UAA	UAA transporter family	2	2	2	2	2	2	2	2	2	2
PF08473	Family	VGCC_alpha2	Neuronal voltage-dependent calcium channel alpha 2acd	2	2	2	2	2	2	2	2	2	2
PF08544	Family	GHMP_kinases_C	GHMP kinases C terminal	2	2	2	2	2	2	2	2	2	2
PF08628	Family	Nexin_C	Sorting nexin C terminal	2	2	2	2	2	2	2	2	3	2
PF08687	Family	ASD2	Apx/Shroom domain ASD2	2	2	2	2	1	2	2	2	2	2
PF08718	Domain	GLTP	Glycolipid transfer protein (GLTP)	2	2	2	2	3	3	2	2	2	2
PF08766	Domain	DEK_C	DEK C terminal domain	2	2	2	2	2	2	2	2	2	2
PF08782	Domain	c-SKI_SMAD_bind	c-SKI Smad4 binding domain	2	2	2	2	2	2	2	2	2	2
PF08826	Coiled-coil	DMPK_coil	DMPK coiled coil domain like	2	2	2	2	2	2	2	2	2	2
PF08926	Domain	DUF1908	Domain of unknown function (DUF1908)	2	2	2	2	2	2	2	2	2	2
PF09127	Domain	Leuk-A4-hydro_C	Leukotriene A4 hydrolase, C-terminal	2	2	2	2	2	2	2	2	2	2
PF09324	Family	DUF1981	Domain of unknown function (DUF1981)	2	2	2	2	2	2	2	2	2	2
PF09333	Family	ATG_C	Autophagy-related protein C terminal domain	2	2	2	2	2	2	2	2	2	2
PF09335	Family	SNARE_assoc	SNARE associated Golgi protein	2	2	2	2	2	2	2	2	2	2
PF09336	Domain	Vps4_C	Vps4 C terminal oligomerisation domain	2	2	2	2	2	3	3	3	2	2
PF09668	Family	Asp_protease	Aspartyl protease	2	2	2	2	2	1	2	2	2	2
PF10034	Family	Dpy19	Q-cell neuroblast polarisation	2	2	2	2	2	2	2	2	2	2
PF10162	Domain	G8	G8 domain	2	2	2	2	2	2	2	2	2	2
PF10256	Domain	Erf4	Golgin subfamily A member 7/ERF4 family	2	2	2	2	2	2	2	2	2	2
PF10257	Family	RAI16-like	Retinoic acid induced 16-like protein	2	2	2	2	2	2	2	2	2	2
PF10300	Family	DUF3808	Protein of unknown function (DUF3808)	2	2	2	2	2	2	2	2	2	2
PF10358	Family	NT-C2	N-terminal C2 in EEIG1 and EHBP1 proteins	2	2	2	2	2	2	2	2	2	2
PF10391	Domain	DNA_pol_lambd_f	Fingers domain of DNA polymerase lambda	2	2	2	2	2	2	2	2	2	2
PF10393	Coiled-coil	Matrilin_ccoil	Trimeric coiled-coil oligomerisation domain of matrilin	2	2	2	2	2	2	2	2	2	2
PF10524	Family	NfI_DNAbd_pre-N	Nuclear factor I protein pre-N-terminus	2	2	2	2	2	2	2	2	2	2
PF10540	Domain	Membr_traf_MHD	Munc13 (mammalian uncoordinated) homology domain	2	2	2	2	1	2	2	2	2	2
PF10541	Domain	KASH	Nuclear envelope localisation domain	2	2	2	2	2	2	2	2	2	2
PF10996	Domain	Beta-Casp	Beta-Casp domain	2	2	2	2	2	2	2	2	2	2
PF11057	Family	Cortexin	Cortexin of kidney	2	2	2	2	2	2	2	2	3	2
PF11799	Domain	IMS_C	impB/mucB/samB family C-terminal domain	2	2	2	2	3	2	2	2	2	2
PF11819	Family	DUF3338	Domain of unknown function (DUF3338)	2	2	2	2	2	2	2	2	3	2
PF11851	Family	DUF3371	Domain of unknown function (DUF3371)	2	2	2	2	2	2	2	2	2	2
PF11857	Family	DUF3377	Domain of unknown function (DUF3377)	2	2	2	2	2	2	2	2	2	2
PF11904	Domain	GPCR_chapero_1	GPCR-chaperone	2	2	2	2	2	2	2	2	2	2
PF12026	Family	CAS_C	Crk-Associated Substrate C-terminal domain	2	2	2	2	2	2	2	2	2	2
PF12062	Family	HSNSD	heparan sulfate-N-deacetylase	2	2	2	2	2	2	2	2	2	2
PF12075	Motif	KN_motif	KN motif	2	2	2	2	2	2	2	2	2	2
PF12347	Domain	HJURP_C	Holliday junction regulator protein family C-terminal repeat	2	2	2	2	2	2	2	2	2	2
PF12352	Domain	V-SNARE_C	Snare region anchored in the vesicle membrane C-terminus	2	2	2	2	3	3	2	2	2	2
PF12413	Family	DLL_N	Homeobox protein distal-less-like N terminal	2	2	2	2	2	2	2	2	2	2
PF12423	Family	KIF1B	Kinesin protein 1B	2	2	2	2	2	2	2	3	3	3
PF12424	Family	ATP_Ca_trans_C	Plasma membrane calcium transporter ATPase C terminal	2	2	2	2	2	2	2	3	2	2
PF12496	Family	BNIP2	Bcl2-/adenovirus E1B nineteen kDa-interacting protein 2	2	2	2	2	2	2	2	2	2	2
PF12533	Family	Neuro_bHLH	Neuronal helix-loop-helix transcription factor	2	2	2	2	2	2	2	2	2	2
PF12736	Domain	CABIT	Cell-cycle sustaining, positive selection,	2	2	2	2	2	2	2	3	2	2
PF12738	Family	PTCB-BRCT	twin BRCT domain	2	2	2	2	2	2	2	2	2	2
PF12783	Domain	Sec7_N	Guanine nucleotide exchange factor in Golgi transport N-terminal	2	2	2	2	2	2	2	2	2	2
PF13012	Family	MitMem_reg	Maintenance of mitochondrial structure and function	2	2	2	2	3	2	2	2	3	3
PF13307	Domain	Helicase_C_2	Helicase C-terminal domain	2	2	2	2	2	2	2	2	2	2
PF13344	Domain	Hydrolase_6	Haloacid dehalogenase-like hydrolase	2	2	3	3	3	2	3	3	3	3
PF13638	Domain	PIN_4	PIN domain	2	2	2	2	2	2	2	2	2	2
PF13793	Domain	Pribosyltran_N	N-terminal domain of ribose phosphate pyrophosphokinase	2	3	3	3	3	2	3	3	3	3
PF13802	Domain	Gal_mutarotas_2	Galactose mutarotase-like	2	2	1	2	2	2	2	2	2	2
PF13854	Repeat	Kelch_5	Kelch motif	2	2	2	2	2	2	2	2	2	2
PF13863	Family	DUF4200	Domain of unknown function (DUF4200)	2	2	2	2	2	2	2	2	2	2
PF13882	Domain	Bravo_FIGEY	Bravo-like intracellular region	2	2	2	2	2	2	2	2	2	2
PF13899	Domain	Thioredoxin_7	Thioredoxin-like	2	2	2	2	2	2	2	2	2	2
PF13921	Domain	Myb_DNA-bind_6	Myb-like DNA-binding domain	2	2	2	2	2	2	2	2	2	2
PF13959	Domain	DUF4217	Domain of unknown function (DUF4217)	2	2	2	2	2	3	2	2	3	2
PF14160	Family	FAM110_C	Centrosome-associated C terminus	2	2	2	2	3	2	2	2	2	2
PF14324	Domain	PINIT	PINIT domain	2	2	2	2	2	2	2	2	2	2
PF14565	Domain	IL22	Interleukin 22 IL-10-related T-cell-derived-inducible factor	2	2	1	1	1	1	1	1	1	1
PF14709	Domain	DND1_DSRM	double strand RNA binding domain from DEAD END PROTEIN 1	2	2	2	2	2	2	2	2	2	2
PF14791	Family	DNA_pol_B_thumb	DNA polymerase beta thumb	2	2	2	2	2	2	2	2	2	2
PF15005	Family	IZUMO	Izumo sperm-egg fusion, Ig domain-associated	2	2	2	2	2	2	2	2	2	2
PF15409	Domain	PH_8	Pleckstrin homology domain	2	2	2	2	2	1	2	2	2	2
PF15612	Family	WHIM1	WSTF, HB1, Itc1p, MBD9 motif 1	2	2	2	2	2	2	2	2	2	2
PF15613	Family	WSD	Williams-Beuren syndrome DDT (WSD), D-TOX E motif	2	2	2	2	2	2	2	2	2	2
PF15636	Family	Tox-GHH	GHH signature containing HNH/Endo VII superfamily nuclease toxin	2	2	2	2	2	2	2	2	2	2
PF15787	Family	DUF4704	Domain of unknown function (DUF4704)	2	2	2	2	2	2	2	2	2	2
PF15901	Domain	Sortilin_C	Sortilin, neurotensin receptor 3, C-terminal	2	3	3	3	3	3	3	3	3	3
PF15913	Domain	Furin-like_2	Furin-like repeat, cysteine-rich	2	2	2	2	2	2	2	3	2	2
PF15951	Family	MITF_TFEB_C_3_N	MITF/TFEB/TFEC/TFE3 N-terminus	2	2	2	2	2	1	2	2	2	2
PF16124	Domain	RecQ_Zn_bind	RecQ zinc-binding	2	2	2	2	2	2	2	2	2	2
PF16159	Domain	FOXP-CC	FOXP coiled-coil domain	2	2	2	2	2	2	2	2	2	2
PF16177	Family	ACAS_N	Acetyl-coenzyme A synthetase N-terminus	2	2	2	3	2	2	2	2	2	2
PF16182	Family	AbLIM_anchor	Putative adherens-junction anchoring region of AbLIM	2	2	2	2	2	2	2	2	2	2
PF16213	Family	DCB	Dimerisation and cyclophilin-binding domain of Mon2	2	2	2	2	2	2	2	2	2	2
PF16366	Domain	CEBP_ZZ	Cytoplasmic polyadenylation element-binding protein ZZ domain	2	2	2	2	2	2	2	2	2	2
PF16367	Domain	RRM_7	RNA recognition motif	2	2	2	2	2	2	2	2	2	2
PF16423	Domain	COE1_HLH	Transcription factor COE1 helix-loop-helix domain	2	2	3	2	2	2	2	2	2	2
PF16486	Domain	ArgoN	N-terminal domain of argonaute	2	2	2	2	2	2	2	2	2	2
PF16487	Domain	ArgoMid	Mid domain of argonaute	2	2	2	2	2	2	2	2	2	2
PF16488	Family	ArgoL2	Argonaute linker 2 domain	2	2	2	2	2	2	2	2	2	2
PF16493	Family	Meis_PKNOX_N	N-terminal of Homeobox Meis and PKNOX1	2	3	3	3	3	3	3	3	3	3
PF16516	Domain	CC2-LZ	Leucine zipper of domain CC2 of NEMO, NF-kappa-B essential modulator	2	2	2	2	2	2	2	2	2	2
PF16517	Domain	Nore1-SARAH	Novel Ras effector 1 C-terminal SARAH (Sav/Rassf/Hpo) domain	2	3	3	3	3	4	3	3	3	3
PF16519	Domain	TRPM_tetra	Tetramerisation domain of TRPM	2	2	2	2	2	2	2	2	2	2
PF16526	Coiled-coil	CLZ	C-terminal leucine zipper domain of cyclic nucleotide-gated channels	2	2	2	2	2	2	2	2	2	2
PF16863	Domain	NtCtMGAM_N	N-terminal barrel of NtMGAM and CtMGAM, maltase-glucoamylase	2	2	3	2	3	3	2	2	2	2
PF16909	Family	VPS13_C	Vacuolar-sorting-associated 13 protein C-terminal	2	2	2	2	2	2	2	2	2	2
PF17035	Family	BET	Bromodomain extra-terminal - transcription regulation	2	2	2	2	2	2	2	2	2	2
PF17171	Domain	GST_C_6	Glutathione S-transferase, C-terminal domain	2	2	2	2	2	2	2	2	2	2
PF17217	Domain	UPA	UPA domain	2	3	3	3	3	2	3	3	3	3
PF17218	Motif	CBX7_C	CBX family C-terminal motif	2	3	3	3	3	3	3	3	3	3
PF00039	Domain	fn1	Fibronectin type I domain	2	2	2	2	2	2	2	2	2	2
PF00080	Domain	Sod_Cu	Copper/zinc superoxide dismutase (SODC)	2	2	2	2	2	2	2	2	2	2
PF00136	Family	DNA_pol_B	DNA polymerase family B	2	2	2	2	2	2	2	2	2	2
PF00159	Family	Hormone_3	Pancreatic hormone peptide	2	2	2	1	1	1	2	2	2	2
PF00206	Domain	Lyase_1	Lyase	2	2	2	2	2	2	2	2	2	2
PF00212	Family	ANP	Atrial natriuretic peptide	2	2	1	2	2	1	2	2	2	2
PF00214	Family	Calc_CGRP_IAPP	Calcitonin / CGRP / IAPP family	2	2	2	2	2	1	2	2	2	2
PF00217	Domain	ATP-gua_Ptrans	ATP:guanido phosphotransferase, C-terminal catalytic domain	2	2	2	2	2	2	3	2	2	2
PF00264	Domain	Tyrosinase	Common central domain of tyrosinase	2	2	2	2	2	2	2	2	2	2
PF00274	Domain	Glycolytic	Fructose-bisphosphate aldolase class-I	2	2	2	2	2	3	2	3	2	2
PF00278	Domain	Orn_DAP_Arg_deC	Pyridoxal-dependent decarboxylase, C-terminal sheet domain	2	2	2	2	3	2	2	2	2	2
PF00294	Family	PfkB	pfkB family carbohydrate kinase	2	2	2	2	2	2	1	2	2	2
PF00322	Repeat	Endothelin	Endothelin family	2	2	2	2	2	1	2	2	2	2
PF00330	Family	Aconitase	Aconitase family (aconitate hydratase)	2	2	2	2	2	2	2	2	2	2
PF00343	Family	Phosphorylase	Carbohydrate phosphorylase	2	2	2	2	1	2	2	2	2	2
PF00351	Domain	Biopterin_H	Biopterin-dependent aromatic amino acid hydroxylase	2	2	2	2	2	2	2	2	2	2
PF00352	Domain	TBP	Transcription factor TFIID (or TATA-binding protein, TBP)	2	2	2	2	2	2	2	2	1	2
PF00365	Domain	PFK	Phosphofructokinase	2	2	2	2	2	2	2	2	2	2
PF00390	Domain	malic	Malic enzyme, N-terminal domain	2	2	2	2	2	2	2	2	2	2
PF00398	Domain	RrnaAD	Ribosomal RNA adenine dimethylase	2	2	2	2	2	2	2	2	2	2
PF00403	Domain	HMA	Heavy-metal-associated domain	2	2	2	2	2	2	2	2	2	2
PF00418	Family	Tubulin-binding	Tau and MAP protein, tubulin-binding repeat	2	2	2	2	2	2	2	2	1	2
PF00432	Repeat	Prenyltrans	Prenyltransferase and squalene oxidase repeat	2	2	2	2	2	2	2	2	2	2
PF00476	Family	DNA_pol_A	DNA polymerase family A	2	2	1	2	2	2	2	2	2	2
PF00485	Domain	PRK	Phosphoribulokinase / Uridine kinase family	2	2	2	2	2	2	2	2	2	2
PF00491	Domain	Arginase	Arginase family	2	2	2	2	2	2	2	2	2	2
PF00525	Family	Crystallin	Alpha crystallin A chain, N terminal	2	2	2	2	2	2	2	2	2	2
PF00551	Domain	Formyl_trans_N	Formyl transferase	2	2	2	2	2	2	2	2	2	2
PF00562	Domain	RNA_pol_Rpb2_6	RNA polymerase Rpb2, domain 6	2	2	2	2	2	2	2	2	2	2
PF00570	Domain	HRDC	HRDC domain	2	2	2	2	2	2	2	2	2	2
PF00586	Domain	AIRS	AIR synthase related protein, N-terminal domain	2	2	2	2	2	2	2	2	2	2
PF00588	Family	SpoU_methylase	SpoU rRNA Methylase family	2	2	2	2	2	2	2	2	2	2
PF00623	Domain	RNA_pol_Rpb1_2	RNA polymerase Rpb1, domain 2	2	2	2	2	2	2	2	2	3	2
PF00670	Domain	AdoHcyase_NAD	S-adenosyl-L-homocysteine hydrolase, NAD binding domain	2	2	2	2	2	3	2	2	2	2
PF00682	Domain	HMGL-like	HMGL-like	2	2	1	2	2	2	2	2	2	2
PF00686	Family	CBM_20	Starch binding domain	2	2	2	2	1	1	2	2	2	2
PF00694	Domain	Aconitase_C	Aconitase C-terminal domain	2	2	2	2	2	2	2	2	2	2
PF00723	Domain	Glyco_hydro_15	Glycosyl hydrolases family 15	2	2	1	2	2	2	2	2	2	2
PF00726	Domain	IL10	Interleukin 10	2	2	2	3	2	2	2	2	2	2
PF00730	Domain	HhH-GPD	HhH-GPD superfamily base excision DNA repair protein	2	2	2	2	2	2	2	2	2	2
PF00749	Domain	tRNA-synt_1c	tRNA synthetases class I (E and Q), catalytic domain	2	2	1	2	2	2	2	2	2	2
PF00797	Family	Acetyltransf_2	N-acetyltransferase	2	1	1	1	2	1	1	2	1	1
PF00810	Family	ER_lumen_recept	ER lumen protein retaining receptor	2	2	2	2	2	2	2	2	2	2
PF00837	Family	T4_deiodinase	Iodothyronine deiodinase	2	2	2	2	2	2	2	2	2	2
PF00870	Domain	P53	P53 DNA-binding domain	2	2	2	2	2	2	2	2	2	2
PF00892	Family	EamA	EamA-like transporter family	2	2	2	1	2	1	2	2	2	2
PF00903	Domain	Glyoxalase	Glyoxalase/Bleomycin resistance protein/Dioxygenase superfamily	2	2	1	2	1	2	2	2	2	2
PF01019	Domain	G_glu_transpept	Gamma-glutamyltranspeptidase	2	2	2	2	2	2	3	2	2	2
PF01026	Domain	TatD_DNase	TatD related DNase	2	2	2	2	1	2	2	2	2	2
PF01056	Family	Myc_N	Myc amino-terminal region	2	2	2	2	2	1	2	2	2	2
PF01068	Domain	DNA_ligase_A_M	ATP dependent DNA ligase domain	2	2	2	2	1	2	2	2	2	2
PF01084	Family	Ribosomal_S18	Ribosomal protein S18	2	2	2	2	3	2	2	2	2	2
PF01085	Domain	HH_signal	Hedgehog amino-terminal signalling domain	2	2	2	2	1	1	2	2	2	1
PF01112	Domain	Asparaginase_2	Asparaginase	2	2	2	2	2	2	2	2	2	2
PF01122	Family	Cobalamin_bind	Eukaryotic cobalamin-binding protein	2	2	2	2	2	2	2	1	2	2
PF01130	Family	CD36	CD36 family	2	2	2	2	2	2	2	2	2	3
PF01135	Family	PCMT	Protein-L-isoaspartate(D-aspartate) O-methyltransferase (PCMT)	2	2	2	2	1	2	2	2	2	2
PF01146	Family	Caveolin	Caveolin	2	2	2	1	2	2	2	2	2	2
PF01160	Family	Opiods_neuropep	Vertebrate endogenous opioids neuropeptide	2	2	2	2	2	2	2	2	2	2
PF01163	Family	RIO1	RIO1 family	2	2	2	2	2	2	2	2	2	2
PF01170	Domain	UPF0020	Putative RNA methylase family UPF0020	2	2	2	2	2	2	2	2	2	2
PF01210	Family	NAD_Gly3P_dh_N	NAD-dependent glycerol-3-phosphate dehydrogenase N-terminus	2	2	1	1	1	1	1	1	1	1
PF01222	Family	ERG4_ERG24	Ergosterol biosynthesis ERG4/ERG24 family	2	2	2	2	2	2	2	2	2	2
PF01234	Family	NNMT_PNMT_TEMT	NNMT/PNMT/TEMT family	2	2	2	2	2	1	2	2	2	2
PF01239	Repeat	PPTA	Protein prenyltransferase alpha subunit repeat	2	2	2	2	2	2	2	2	2	2
PF01244	Domain	Peptidase_M19	Membrane dipeptidase (Peptidase family M19)	2	2	2	1	1	2	2	2	2	2
PF01267	Family	F-actin_cap_A	F-actin capping protein alpha subunit	2	2	2	2	2	1	2	2	3	2
PF01275	Family	Myelin_PLP	Myelin proteolipid protein (PLP or lipophilin)	2	2	2	2	2	1	2	2	2	2
PF01387	Family	Synuclein	Synuclein	2	2	2	1	2	2	2	2	2	2
PF01401	Family	Peptidase_M2	Angiotensin-converting enzyme	2	2	2	2	1	2	1	2	2	2
PF01416	Domain	PseudoU_synth_1	tRNA pseudouridine synthase	2	2	2	2	2	2	2	2	2	2
PF01432	Family	Peptidase_M3	Peptidase family M3	2	2	2	2	2	2	2	2	2	2
PF01509	Family	TruB_N	TruB family pseudouridylate synthase (N terminal domain)	2	2	2	2	2	1	2	2	2	2
PF01554	Family	MatE	MatE	2	2	1	1	1	1	1	1	2	1
PF01557	Family	FAA_hydrolase	Fumarylacetoacetate (FAA) hydrolase family	2	2	2	2	2	2	2	2	2	2
PF01564	Domain	Spermine_synth	Spermine/spermidine synthase domain	2	2	2	2	2	1	2	2	2	2
PF01571	Domain	GCV_T	Aminomethyltransferase folate-binding domain	2	2	2	2	2	2	2	2	2	2
PF01595	Family	DUF21	Cyclin M transmembrane N-terminal domain	2	2	1	2	2	2	2	2	1	2
PF01636	Family	APH	Phosphotransferase enzyme family	2	2	1	2	2	2	2	2	2	2
PF01704	Family	UDPGP	UTP--glucose-1-phosphate uridylyltransferase	2	2	2	1	2	2	2	2	2	2
PF01722	Family	BolA	BolA-like protein	2	2	2	2	3	2	2	2	2	2
PF01731	Family	Arylesterase	Arylesterase	2	2	2	1	2	2	2	2	2	2
PF01746	Family	tRNA_m1G_MT	tRNA (Guanine-1)-methyltransferase	2	2	2	2	2	2	2	2	2	2
PF01755	Family	Glyco_transf_25	Glycosyltransferase family 25 (LPS biosynthesis protein)	2	2	2	2	2	1	2	2	2	2
PF01769	Family	MgtE	Divalent cation transporter	2	2	2	2	1	2	2	2	2	2
PF01770	Family	Folate_carrier	Reduced folate carrier	2	2	2	2	2	2	2	2	2	2
PF01798	Family	Nop	snoRNA binding domain, fibrillarin	2	2	2	2	1	2	2	2	2	2
PF01841	Family	Transglut_core	Transglutaminase-like superfamily	2	2	3	2	2	2	2	2	2	2
PF01857	Domain	RB_B	Retinoblastoma-associated protein B domain	2	2	2	2	2	2	2	2	2	2
PF01858	Domain	RB_A	Retinoblastoma-associated protein A domain	2	2	2	2	2	2	2	2	2	2
PF02078	Domain	Synapsin	Synapsin, N-terminal domain	2	2	1	1	2	1	2	2	2	2
PF02100	Family	ODC_AZ	Ornithine decarboxylase antizyme	2	2	2	2	2	2	2	2	2	2
PF02142	Domain	MGS	MGS-like domain	2	2	2	2	2	1	2	2	2	2
PF02177	Domain	APP_N	Amyloid A4 N-terminal heparin-binding	2	1	2	2	2	2	2	2	3	2
PF02180	Family	BH4	Bcl-2 homology region 4	2	2	2	2	2	2	2	2	2	2
PF02192	Family	PI3K_p85B	PI3-kinase family, p85-binding domain	2	2	2	1	2	2	2	2	2	2
PF02194	Family	PXA	PXA domain	2	2	2	2	2	2	2	2	3	2
PF02208	Family	Sorb	Sorbin homologous domain	2	2	2	2	2	2	2	2	2	1
PF02213	Domain	GYF	GYF domain	2	2	2	2	2	2	2	2	1	2
PF02230	Domain	Abhydrolase_2	Phospholipase/Carboxylesterase	2	2	2	3	2	1	2	2	2	2
PF02251	Family	PA28_alpha	Proteasome activator pa28 alpha subunit	2	2	2	2	2	2	2	2	2	2
PF02252	Family	PA28_beta	Proteasome activator pa28 beta subunit	2	2	2	2	2	2	2	2	2	2
PF02262	Domain	Cbl_N	CBL proto-oncogene N-terminal domain 1	2	2	1	2	2	2	2	2	2	2
PF02354	Family	Latrophilin	Latrophilin Cytoplasmic C-terminal region	2	2	2	2	2	2	2	2	2	2
PF02377	Family	Dishevelled	Dishevelled specific domain	2	2	2	2	2	2	2	2	2	2
PF02494	Domain	HYR	HYR domain	2	2	2	2	2	2	2	2	2	2
PF02536	Family	mTERF	mTERF	2	2	2	2	2	2	2	3	2	2
PF02574	Family	S-methyl_trans	Homocysteine S-methyltransferase	2	2	1	2	1	2	2	2	2	2
PF02671	Repeat	PAH	Paired amphipathic helix repeat	2	1	2	2	2	2	2	2	2	2
PF02714	Family	RSN1_7TM	Calcium-dependent channel, 7TM region, putative phosphate	2	2	2	2	1	2	2	2	2	2
PF02732	Domain	ERCC4	ERCC4 domain	2	2	2	2	2	2	3	3	2	3
PF02761	Domain	Cbl_N2	CBL proto-oncogene N-terminus, EF hand-like domain	2	2	2	2	2	2	2	2	2	2
PF02762	Domain	Cbl_N3	CBL proto-oncogene N-terminus, SH2-like domain	2	2	2	2	2	2	2	2	2	2
PF02817	Family	E3_binding	e3 binding domain	2	2	2	2	2	1	2	2	2	2
PF02827	Family	PKI	cAMP-dependent protein kinase inhibitor	2	2	2	2	2	2	2	2	2	2
PF02877	Domain	PARP_reg	Poly(ADP-ribose) polymerase, regulatory domain	2	2	2	2	2	2	2	2	2	2
PF02878	Domain	PGM_PMM_I	Phosphoglucomutase/phosphomannomutase, alpha/beta/alpha domain I	2	2	3	3	3	2	3	3	3	3
PF02882	Domain	THF_DHG_CYH_C	Tetrahydrofolate dehydrogenase/cyclohydrolase, NAD(P)-binding domain	2	2	2	2	3	2	2	2	2	2
PF02898	Domain	NO_synthase	Nitric oxide synthase, oxygenase domain	2	2	2	2	2	2	2	2	2	2
PF02911	Domain	Formyl_trans_C	Formyl transferase, C-terminal domain	2	2	2	2	2	1	2	2	2	2
PF02913	Domain	FAD-oxidase_C	FAD linked oxidases, C-terminal domain	2	2	2	2	2	2	2	2	2	2
PF02946	Family	GTF2I	GTF2I-like repeat	2	2	2	2	2	2	2	2	2	2
PF03029	Domain	ATP_bind_1	Conserved hypothetical ATP binding protein	2	2	2	2	2	2	2	2	2	2
PF03171	Domain	2OG-FeII_Oxy	2OG-Fe(II) oxygenase superfamily	2	2	2	2	2	1	2	1	2	2
PF03178	Family	CPSF_A	CPSF A subunit region	2	2	2	2	2	2	2	2	2	2
PF03179	Family	V-ATPase_G	Vacuolar (H+)-ATPase G subunit	2	2	2	3	3	2	2	2	2	2
PF03189	Family	Otopetrin	Otopetrin	2	2	2	2	2	2	2	2	2	2
PF03194	Family	LUC7	LUC7 N_terminus	2	2	2	2	2	2	2	2	2	2
PF03208	Family	PRA1	PRA1 family protein	2	2	2	2	2	2	2	2	2	2
PF03259	Domain	Robl_LC7	Roadblock/LC7 domain	2	2	2	3	3	2	2	2	2	2
PF03271	Family	EB1	EB1-like C-terminal motif	2	2	2	2	3	2	2	2	2	2
PF03366	Family	YEATS	YEATS family	2	2	2	2	3	2	2	2	2	2
PF03399	Family	SAC3_GANP	SAC3/GANP family	2	2	2	2	2	1	2	2	2	2
PF03446	Domain	NAD_binding_2	NAD binding domain of 6-phosphogluconate dehydrogenase	2	2	2	2	2	2	2	2	2	2
PF03473	Domain	MOSC	MOSC domain	2	2	2	2	2	2	2	2	2	2
PF03474	Domain	DMA	DMRTA motif	2	2	2	2	2	2	2	2	2	2
PF03476	Domain	MOSC_N	MOSC N-terminal beta barrel domain	2	2	2	2	2	2	2	2	2	2
PF03489	Family	SapB_2	Saposin-like type B, region 2	2	2	2	2	1	1	2	2	2	2
PF03493	Family	BK_channel_a	Calcium-activated BK potassium channel alpha subunit	2	2	2	2	2	1	2	2	2	2
PF03529	Family	TF_Otx	Otx1 transcription factor	2	2	2	2	2	2	2	2	2	2
PF03530	Family	SK_channel	Calcium-activated SK potassium channel	2	2	2	2	2	2	2	2	2	2
PF03643	Family	Vps26	Vacuolar protein sorting-associated protein 26	2	1	2	2	2	2	2	2	2	2
PF03747	Family	ADP_ribosyl_GH	ADP-ribosylglycohydrolase	2	2	2	2	2	2	2	2	2	2
PF03782	Domain	AMOP	AMOP domain	2	2	2	2	2	2	2	2	2	1
PF03792	Family	PBC	PBC domain	2	2	2	2	2	2	2	2	2	2
PF03836	Family	RasGAP_C	RasGAP C-terminus	2	2	2	2	2	2	2	2	2	2
PF03853	Domain	YjeF_N	YjeF-related protein N-terminus	2	2	2	2	2	2	2	2	1	2
PF03876	Domain	SHS2_Rpb7-N	SHS2 domain found in N terminus of Rpb7p/Rpc25p/MJ0397	2	2	2	2	2	2	2	2	2	2
PF03909	Domain	BSD	BSD domain	2	2	2	2	2	2	2	2	2	2
PF03914	Family	CBF	CBF/Mak21 family	2	2	2	2	2	1	2	2	2	2
PF03949	Domain	Malic_M	Malic enzyme, NAD binding domain	2	2	2	2	2	1	2	2	2	2
PF03992	Domain	ABM	Antibiotic biosynthesis monooxygenase	2	2	2	2	2	2	2	2	2	1
PF04003	Family	Utp12	Dip2/Utp12 Family	2	2	2	2	1	1	2	2	2	2
PF04042	Family	DNA_pol_E_B	DNA polymerase alpha/epsilon subunit B	2	2	2	2	2	2	2	2	2	2
PF04061	Family	ORMDL	ORMDL family	2	2	2	2	2	2	2	2	2	2
PF04440	Family	Dysbindin	Dysbindin (Dystrobrevin binding protein 1)	2	2	2	2	2	2	2	2	2	2
PF04499	Family	SAPS	SIT4 phosphatase-associated protein	2	2	2	2	2	2	2	2	2	1
PF04503	Family	SSDP	Single-stranded DNA binding protein, SSDP	2	2	2	2	2	2	2	2	2	2
PF04511	Family	DER1	Der1-like family	2	2	2	2	2	2	1	2	2	2
PF04560	Domain	RNA_pol_Rpb2_7	RNA polymerase Rpb2, domain 7	2	2	2	2	2	2	2	2	2	2
PF04561	Domain	RNA_pol_Rpb2_2	RNA polymerase Rpb2, domain 2	2	2	2	2	2	2	2	2	2	2
PF04565	Domain	RNA_pol_Rpb2_3	RNA polymerase Rpb2, domain 3	2	2	2	2	2	2	2	2	2	2
PF04571	Family	Lipin_N	lipin, N-terminal conserved region	2	2	2	2	2	2	2	2	2	2
PF04579	Family	Keratin_matx	Keratin, high-sulphur matrix protein	2	1	2	2	2	2	2	2	2	2
PF04589	Family	RFX1_trans_act	RFX1 transcription activation region	2	2	2	2	2	2	2	2	2	2
PF04621	Family	ETS_PEA3_N	PEA3 subfamily ETS-domain transcription factor N terminal domain	2	2	2	2	2	1	2	2	2	2
PF04636	Family	PA26	PA26 p53-induced protein (sestrin)	2	2	2	2	2	2	2	2	2	2
PF04675	Family	DNA_ligase_A_N	DNA ligase N terminus	2	2	2	2	1	2	2	2	2	2
PF04679	Family	DNA_ligase_A_C	ATP dependent DNA ligase C terminal region	2	2	1	2	1	1	2	2	2	2
PF04710	Family	Pellino	Pellino	2	2	2	2	2	2	2	2	2	2
PF04731	Family	Caudal_act	Caudal like protein activation region	2	2	2	1	1	1	2	2	2	2
PF04777	Family	Evr1_Alr	Erv1 / Alr family	2	2	1	2	2	1	2	2	2	2
PF04791	Family	LMBR1	LMBR1-like membrane protein	2	2	2	2	2	2	2	2	2	2
PF04814	Family	HNF-1_N	Hepatocyte nuclear factor 1 (HNF-1), N terminus	2	2	2	2	2	2	2	2	2	2
PF04824	Family	Rad21_Rec8	Conserved region of Rad21 / Rec8 like protein	2	2	2	2	2	2	1	2	2	2
PF04825	Family	Rad21_Rec8_N	N terminus of Rad21 / Rec8 like protein	2	2	2	2	2	2	2	2	2	2
PF04831	Family	Popeye	Popeye protein conserved region	2	2	2	2	2	2	2	2	2	2
PF04847	Family	Calcipressin	Calcipressin	2	2	2	2	2	2	2	2	2	2
PF04849	Family	HAP1_N	HAP1 N-terminal conserved region	2	2	1	2	2	2	2	2	2	2
PF04906	Family	Tweety	Tweety	2	2	2	2	2	2	2	2	2	2
PF04928	Domain	PAP_central	Poly(A) polymerase central domain	2	2	2	1	2	2	2	2	2	2
PF04983	Domain	RNA_pol_Rpb1_3	RNA polymerase Rpb1, domain 3	2	2	2	2	2	1	2	2	3	2
PF04997	Domain	RNA_pol_Rpb1_1	RNA polymerase Rpb1, domain 1	2	2	2	2	2	2	2	2	3	2
PF04998	Domain	RNA_pol_Rpb1_5	RNA polymerase Rpb1, domain 5	2	2	2	2	2	2	2	2	3	2
PF05000	Domain	RNA_pol_Rpb1_4	RNA polymerase Rpb1, domain 4	2	2	2	2	2	2	2	2	3	2
PF05010	Coiled-coil	TACC_C	Transforming acidic coiled-coil-containing protein (TACC), C-terminal	2	2	2	2	2	2	2	2	2	2
PF05018	Family	DUF667	Protein of unknown function (DUF667)	2	1	2	2	2	2	2	2	2	2
PF05041	Family	Pecanex_C	Pecanex protein (C-terminus)	2	2	2	2	2	2	2	2	2	2
PF05047	Domain	L51_S25_CI-B8	Mitochondrial ribosomal protein L51 / S25 / CI-B8 domain	2	2	2	2	2	2	2	2	3	2
PF05063	Family	MT-A70	MT-A70	2	2	2	2	2	2	2	2	2	2
PF05118	Domain	Asp_Arg_Hydrox	Aspartyl/Asparaginyl beta-hydroxylase	2	1	2	2	2	2	2	2	2	2
PF05147	Family	LANC_like	Lanthionine synthetase C-like protein	2	2	2	2	2	2	2	2	2	2
PF05154	Domain	TM2	TM2 domain	2	2	2	2	2	2	2	2	2	2
PF05191	Domain	ADK_lid	Adenylate kinase, active site lid	2	2	2	2	2	2	2	2	2	2
PF05241	Family	EBP	Emopamil binding protein	2	1	1	1	1	1	1	1	1	1
PF05308	Family	Mito_fiss_reg	Mitochondrial fission regulator	2	2	2	2	2	2	2	2	2	2
PF05351	Family	GMP_PDE_delta	GMP-PDE, delta subunit	2	2	2	2	2	2	2	2	2	2
PF05406	Domain	WGR	WGR domain	2	2	2	2	2	2	2	2	2	2
PF05517	Domain	p25-alpha	p25-alpha	2	2	2	2	2	2	2	2	2	2
PF05556	Family	Calsarcin	Calcineurin-binding protein (Calsarcin)	2	2	2	2	2	2	2	2	2	2
PF05624	Domain	LSR	Lipolysis stimulated receptor (LSR)	2	2	2	2	2	2	2	2	2	2
PF05648	Family	PEX11	Peroxisomal biogenesis factor 11 (PEX11)	2	2	2	2	2	2	2	2	2	2
PF05672	Family	MAP7	MAP7 (E-MAP-115) family	2	2	2	2	2	2	2	2	2	3
PF05686	Family	Glyco_transf_90	Glycosyl transferase family 90	2	2	2	2	2	1	2	2	2	2
PF05746	Domain	DALR_1	DALR anticodon binding domain	2	2	2	2	2	2	2	2	2	2
PF05790	Domain	C2-set	Immunoglobulin C2-set domain	2	2	1	2	2	2	2	2	2	2
PF05875	Family	Ceramidase	Ceramidase	2	2	2	2	2	2	2	2	2	2
PF05916	Family	Sld5	GINS complex protein	2	2	2	2	2	2	2	2	2	2
PF06268	Domain	Fascin	Fascin domain	2	2	2	2	2	2	2	2	2	2
PF06294	Domain	CH_2	CH-like domain in sperm protein	2	1	2	2	1	2	2	2	2	2
PF06345	Motif	Drf_DAD	DRF Autoregulatory Domain	2	2	2	2	1	2	2	2	2	2
PF06365	Family	CD34_antigen	CD34/Podocalyxin family	2	2	1	2	1	2	2	2	2	2
PF06387	Family	Calcyon	D1 dopamine receptor-interacting protein (calcyon)	2	2	2	2	2	2	2	2	2	2
PF06418	Domain	CTP_synth_N	CTP synthase N-terminus	2	2	1	1	1	1	1	1	1	1
PF06461	Domain	DUF1086	Domain of Unknown Function (DUF1086)	2	2	2	1	2	2	2	2	2	2
PF06465	Domain	DUF1087	Domain of Unknown Function (DUF1087)	2	2	2	2	2	2	2	2	2	2
PF06479	Family	Ribonuc_2-5A	Ribonuclease 2-5A	2	2	2	2	2	2	2	2	2	2
PF06650	Family	SHR-BD	SHR-binding domain of vacuolar-sorting associated protein 13	2	2	2	2	2	1	2	2	2	2
PF06702	Family	Fam20C	Golgi casein kinase, C-terminal, Fam20	2	2	2	2	2	2	2	2	2	2
PF06816	Family	NOD	NOTCH protein	2	2	2	2	2	2	2	2	2	2
PF07001	Family	BAT2_N	BAT2 N-terminus	2	2	2	2	2	2	2	2	2	2
PF07159	Family	DUF1394	Protein of unknown function (DUF1394)	2	2	2	2	2	1	2	2	2	2
PF07162	Family	B9-C2	Ciliary basal body-associated, B9 protein	2	2	1	2	2	2	1	2	2	2
PF07200	Domain	Mod_r	Modifier of rudimentary (Mod(r)) protein	2	2	2	2	2	2	2	2	2	2
PF07469	Domain	DUF1518	Domain of unknown function (DUF1518)	2	2	2	2	2	2	2	2	2	2
PF07479	Domain	NAD_Gly3P_dh_C	NAD-dependent glycerol-3-phosphate dehydrogenase C-terminus	2	2	1	1	1	2	1	1	1	1
PF07502	Domain	MANEC	MANEC domain	2	2	2	2	2	2	2	2	2	2
PF07521	Motif	RMMBL	Zn-dependent metallo-hydrolase RNA specificity domain	2	2	2	2	2	2	2	2	2	2
PF07524	Domain	Bromo_TP	Bromodomain associated	2	2	2	2	2	2	2	2	2	2
PF07545	Family	Vg_Tdu	Vestigial/Tondu family	2	2	2	2	2	2	2	2	2	2
PF07684	Family	NODP	NOTCH protein	2	2	2	2	2	2	2	2	2	2
PF07691	Domain	PA14	PA14 domain	2	2	1	2	2	2	2	2	2	2
PF07710	Motif	P53_tetramer	P53 tetramerisation motif	2	2	2	2	2	2	2	2	2	2
PF07766	Family	LETM1	LETM1-like protein	2	2	2	2	2	2	2	2	1	2
PF07773	Family	DUF1619	Protein of unknown function (DUF1619)	2	2	2	2	2	2	2	2	2	2
PF07782	Family	DC_STAMP	DC-STAMP-like protein	2	2	2	2	2	2	2	2	2	2
PF07815	Family	Abi_HHR	Abl-interactor HHR	2	2	2	2	2	2	2	2	2	2
PF07856	Family	Orai-1	Mediator of CRAC channel activity	2	2	2	2	2	2	2	2	2	2
PF07910	Family	Peptidase_C78	Peptidase family C78	2	1	2	2	2	2	2	2	2	2
PF07970	Family	COPIIcoated_ERV	Endoplasmic reticulum vesicle transporter	2	1	2	2	2	2	2	2	2	2
PF07986	Domain	TBCC	Tubulin binding cofactor C	2	2	2	2	2	2	2	2	2	2
PF08073	Domain	CHDNT	CHDNT (NUC034) domain	2	2	2	2	2	2	2	2	2	2
PF08074	Domain	CHDCT2	CHDCT2 (NUC038) domain	2	2	2	1	2	2	2	2	2	2
PF08075	Domain	NOPS	NOPS (NUC059) domain	2	2	2	2	2	2	2	2	2	2
PF08080	Domain	zf-RNPHF	RNPHF zinc finger	2	2	2	2	3	2	2	2	2	2
PF08159	Domain	NUC153	NUC153 domain	2	1	1	1	1	1	1	1	1	1
PF08165	Domain	FerA	FerA (NUC095) domain	2	2	2	2	2	1	2	2	2	2
PF08174	Domain	Anillin	Cell division protein anillin	2	2	2	2	2	2	2	2	2	2
PF08190	Family	PIH1	PIH1 N-terminal domain	2	2	1	2	2	2	2	2	2	2
PF08235	Domain	LNS2	LNS2 (Lipin/Ned1/Smp2)	2	2	2	2	2	1	2	2	2	2
PF08271	Domain	TF_Zn_Ribbon	TFIIB zinc-binding	2	2	2	2	2	1	2	2	2	2
PF08313	Domain	SCA7	SCA7, zinc-binding domain	2	2	2	2	2	2	2	2	2	2
PF08321	Family	PPP5	PPP5 TPR repeat region	2	2	1	1	2	1	2	2	2	2
PF08336	Family	P4Ha_N	Prolyl 4-Hydroxylase alpha-subunit, N-terminal region	2	1	2	2	2	2	2	2	2	2
PF08374	Family	Protocadherin	Protocadherin	2	2	2	2	2	2	3	2	2	2
PF08383	Family	Maf_N	Maf N-terminal region	2	1	2	2	2	1	2	2	2	2
PF08403	Family	AA_permease_N	Amino acid permease N-terminal	2	2	2	2	2	2	2	2	2	2
PF08412	Family	Ion_trans_N	Ion transport protein N-terminal	2	2	2	2	2	1	2	2	2	2
PF08429	Family	PLU-1	PLU-1-like protein	2	2	2	2	2	2	2	2	2	2
PF08474	Family	MYT1	Myelin transcription factor 1	2	2	2	2	2	2	2	2	2	2
PF08499	Family	PDEase_I_N	3'5'-cyclic nucleotide phosphodiesterase N-terminal	2	2	2	2	2	2	2	2	2	2
PF08506	Domain	Cse1	Cse1	2	2	2	2	2	2	2	2	2	2
PF08514	Family	STAG	STAG domain	2	2	2	2	2	2	2	2	1	2
PF08517	Family	AXH	Ataxin-1 and HBP1 module (AXH)	2	2	2	2	2	2	2	2	2	2
PF08542	Domain	Rep_fac_C	Replication factor C C-terminal domain	2	2	2	2	2	2	2	2	2	2
PF08583	Family	Cmc1	Cytochrome c oxidase biogenesis protein Cmc1 like	2	1	1	1	1	2	1	1	1	2
PF08616	Family	SPA	Stabilization of polarity axis	2	2	2	2	2	1	1	2	2	2
PF08683	Domain	CAMSAP_CKK	Microtubule-binding calmodulin-regulated spectrin-associated	2	2	2	2	2	2	2	2	2	2
PF08688	Family	ASD1	Apx/Shroom domain ASD1	2	2	2	1	2	1	2	2	2	2
PF08700	Family	Vps51	Vps51/Vps67	2	2	2	2	2	1	2	2	2	2
PF08702	Domain	Fib_alpha	Fibrinogen alpha/beta chain family	2	2	2	2	2	2	2	2	2	2
PF08703	Domain	PLC-beta_C	PLC-beta C terminal	2	1	2	2	2	2	2	2	2	2
PF08776	Domain	VASP_tetra	VASP tetramerisation domain	2	2	1	2	2	2	1	2	2	2
PF08788	Domain	NHR2	NHR2 domain like	2	2	2	2	2	2	2	2	2	2
PF08815	Domain	Nuc_rec_co-act	Nuclear receptor coactivator	2	2	2	2	2	2	2	2	2	2
PF08824	Domain	Serine_rich	Serine rich protein interaction domain	2	2	2	2	2	2	2	2	2	2
PF08832	Domain	SRC-1	Steroid receptor coactivator	2	2	2	2	2	2	2	2	2	2
PF08916	Domain	Phe_ZIP	Phenylalanine zipper	2	2	2	2	2	2	2	2	2	2
PF08947	Domain	BPS	BPS (Between PH and SH2)	2	2	2	2	2	2	2	2	2	2
PF08969	Domain	USP8_dimer	USP8 dimerisation domain	2	2	2	2	2	2	2	2	2	2
PF09066	Domain	B2-adapt-app_C	Beta2-adaptin appendage, C-terminal sub-domain	2	2	2	2	2	2	2	2	2	2
PF09128	Domain	RGS-like	Regulator of G protein signalling-like domain	2	1	2	2	2	1	2	2	2	2
PF09273	Domain	Rubis-subs-bind	Rubisco LSMT substrate-binding	2	1	2	2	2	1	2	2	2	2
PF09316	Family	Cmyb_C	C-myb, C-terminal	2	2	2	2	2	2	2	2	2	2
PF09320	Family	DUF1977	Domain of unknown function (DUF1977)	2	2	2	2	2	2	2	2	2	2
PF09358	Domain	E1_UFD	Ubiquitin fold domain	2	2	2	2	2	2	2	2	2	2
PF09409	Domain	PUB	PUB domain	2	2	2	1	1	2	2	2	1	2
PF09532	Domain	FDF	FDF domain	2	1	2	2	2	2	2	2	2	2
PF09596	Domain	MamL-1	MamL-1 domain	2	2	2	2	2	1	2	2	2	2
PF09727	Family	CortBP2	Cortactin-binding protein-2	2	1	2	2	2	2	2	2	2	2
PF09728	Coiled-coil	Taxilin	Myosin-like coiled-coil protein	2	2	2	2	2	2	2	2	2	2
PF09744	Family	Jnk-SapK_ap_N	JNK_SAPK-associated protein-1	2	2	2	2	2	2	2	2	2	2
PF09799	Family	Transmemb_17	Predicted membrane protein	2	2	2	2	2	2	2	1	2	2
PF10075	Family	CSN8_PSD8_EIF3K	CSN8/PSMD8/EIF3K family	2	2	2	2	2	1	2	2	2	2
PF10177	Family	DUF2371	Uncharacterised conserved protein (DUF2371)	2	2	2	2	2	2	2	2	2	2
PF10197	Domain	Cir_N	N-terminal domain of CBF1 interacting co-repressor CIR	2	2	2	2	2	2	2	2	2	2
PF10239	Family	DUF2465	Protein of unknown function (DUF2465)	2	1	2	2	2	2	2	2	2	2
PF10267	Coiled-coil	Tmemb_cc2	Predicted transmembrane and coiled-coil 2 protein	2	2	2	2	2	2	2	2	2	2
PF10291	Domain	muHD	Muniscin C-terminal mu homology domain	2	2	2	2	2	2	2	2	2	1
PF10373	Domain	EST1_DNA_bind	Est1 DNA/RNA binding domain	2	2	2	2	2	2	2	2	2	2
PF10374	Domain	EST1	Telomerase activating protein Est1	2	2	2	2	2	2	2	2	2	2
PF10427	Family	Ago_hook	Argonaute hook	2	2	2	2	2	2	2	2	2	2
PF10433	Domain	MMS1_N	Mono-functional DNA-alkylating methyl methanesulfonate N-term	2	2	2	2	2	2	2	2	2	2
PF10456	Domain	BAR_3_WASP_bdg	WASP-binding domain of Sorting nexin protein	2	2	2	2	2	2	2	2	2	2
PF10469	Domain	AKAP7_NLS	AKAP7 2'5' RNA ligase-like domain	2	2	2	2	2	2	2	2	2	2
PF10515	Family	APP_amyloid	Beta-amyloid precursor protein C-terminus	2	2	2	1	1	2	2	2	2	2
PF10534	Domain	CRIC_ras_sig	Connector enhancer of kinase suppressor of ras	2	2	2	2	2	2	2	2	3	2
PF10568	Family	Tom37	Outer mitochondrial membrane transport complex protein	2	2	2	2	2	2	2	2	2	2
PF10577	Family	UPF0560	Uncharacterised protein family UPF0560	2	2	2	2	2	2	2	2	2	2
PF10585	Domain	UBA_e1_thiolCys	Ubiquitin-activating enzyme active site	2	2	2	2	2	2	2	2	2	2
PF10600	Domain	PDZ_assoc	PDZ-associated domain of NMDA receptors	2	2	2	2	2	2	2	2	2	2
PF10914	Family	DUF2781	Protein of unknown function (DUF2781)	2	2	2	2	2	2	1	2	2	2
PF11365	Family	SOGA	Protein SOGA	2	2	2	2	2	2	2	2	2	2
PF11413	Family	HIF-1	Hypoxia-inducible factor-1	2	2	2	2	2	1	2	2	2	2
PF11414	Family	Suppressor_APC	Adenomatous polyposis coli tumour suppressor protein	2	2	2	2	2	2	2	2	2	2
PF11461	Family	RILP	Rab interacting lysosomal protein	2	2	2	2	2	2	2	2	2	2
PF11515	Family	Cul7	Mouse development and cellular proliferation protein Cullin-7	2	2	2	2	2	2	2	2	2	2
PF11569	Family	Homez	Homeodomain leucine-zipper encoding, Homez	2	2	2	2	2	2	1	2	2	2
PF11601	Domain	Shal-type	Shal-type voltage-gated potassium channels, N-terminal	2	2	2	2	2	2	2	2	2	2
PF11648	Domain	RIG-I_C-RD	C-terminal domain of RIG-I	2	2	1	1	2	1	2	2	2	2
PF11669	Family	WBP-1	WW domain-binding protein 1	2	2	2	2	2	1	2	3	2	2
PF11841	Family	DUF3361	Domain of unknown function (DUF3361)	2	2	2	2	2	2	2	2	2	2
PF11879	Family	DUF3399	Domain of unknown function (DUF3399)	2	2	2	2	2	2	2	2	2	2
PF11881	Family	SPAR_C	C-terminal domain of SPAR protein	2	2	2	2	2	2	2	2	2	2
PF11928	Family	DUF3446	Early growth response N-terminal domain	2	2	2	2	2	2	2	2	2	2
PF11934	Family	DUF3452	Domain of unknown function (DUF3452)	2	2	2	2	2	2	2	2	2	2
PF11969	Family	DcpS_C	Scavenger mRNA decapping enzyme C-term binding	2	2	1	1	2	2	2	2	2	2
PF12004	Family	DUF3498	Domain of unknown function (DUF3498)	2	2	2	2	2	2	2	2	2	2
PF12052	Domain	VGCC_beta4Aa_N	Voltage gated calcium channel subunit beta domain 4Aa N terminal	2	2	2	2	2	2	2	2	2	2
PF12114	Family	Period_C	Period protein 2/3C-terminal region	2	2	2	1	2	1	2	2	2	2
PF12235	Family	FXMRP1_C_core	Fragile X-related 1 protein core C terminal	2	2	1	2	2	2	2	2	2	2
PF12240	Family	Angiomotin_C	Angiomotin C terminal	2	2	2	2	2	2	2	2	2	2
PF12265	Family	CAF1C_H4-bd	Histone-binding protein RBBP4 or subunit C of CAF1 complex	2	2	2	2	2	2	2	2	2	2
PF12316	Family	Dsh_C	Segment polarity protein dishevelled (Dsh) C terminal	2	2	2	2	2	2	2	2	2	2
PF12336	Family	SOXp	SOX transcription factor	2	1	2	2	2	1	2	2	2	2
PF12409	Family	P5-ATPase	P5-type ATPase cation transporter	2	2	2	2	2	2	2	2	2	2
PF12414	Family	Fox-1_C	Calcitonin gene-related peptide regulator C terminal	2	2	2	2	2	2	2	2	2	2
PF12456	Family	hSac2	Inositol phosphatase	2	2	2	2	2	2	2	2	2	2
PF12485	Family	SLY	Lymphocyte signaling adaptor protein	2	2	2	2	2	2	2	2	2	2
PF12509	Family	DUF3715	Protein of unknown function (DUF3715)	2	2	2	1	1	1	2	2	2	2
PF12578	Family	3-PAP	Myotubularin-associated protein	2	2	2	2	2	2	2	2	2	2
PF12606	Family	RELT	Tumour necrosis factor receptor superfamily member 19	2	2	2	2	2	2	2	2	2	2
PF12714	Domain	TILa	TILa domain	2	1	2	2	1	2	2	2	2	2
PF12836	Domain	HHH_3	Helix-hairpin-helix motif	2	2	2	2	2	2	2	2	2	2
PF12848	Domain	ABC_tran_Xtn	ABC transporter	2	2	2	2	2	2	2	2	2	2
PF12851	Domain	Tet_JBP	Oxygenase domain of the 2OGFeDO superfamily	2	2	2	2	2	2	2	2	2	2
PF12872	Domain	OST-HTH	OST-HTH/LOTUS domain	2	2	1	2	2	2	2	2	2	2
PF12885	Family	TORC_M	Transducer of regulated CREB activity middle domain	2	2	2	2	2	2	2	2	2	2
PF12886	Family	TORC_C	Transducer of regulated CREB activity, C terminus	2	2	2	2	2	2	2	2	2	2
PF12901	Domain	SUZ-C	SUZ-C motif	2	2	2	2	1	2	2	2	2	2
PF12925	Domain	APP_E2	E2 domain of amyloid precursor protein	2	2	2	2	2	2	2	2	2	2
PF13088	Domain	BNR_2	BNR repeat-like domain	2	2	2	2	2	2	2	2	2	2
PF13091	Domain	PLDc_2	PLD-like domain	2	2	2	2	2	1	1	2	2	2
PF13238	Domain	AAA_18	AAA domain	2	2	2	3	2	2	2	2	2	2
PF13242	Domain	Hydrolase_like	HAD-hyrolase-like	2	2	2	2	2	2	2	2	2	2
PF13281	Family	DUF4071	Domain of unknown function (DUF4071)	2	2	2	1	2	2	2	2	2	2
PF13293	Family	DUF4074	Domain of unknown function (DUF4074)	2	2	2	2	2	2	2	2	2	2
PF13347	Family	MFS_2	MFS/sugar transport protein	2	2	2	2	2	2	2	3	2	3
PF13374	Repeat	TPR_10	Tetratricopeptide repeat	2	2	1	2	1	2	2	2	2	2
PF13393	Domain	tRNA-synt_His	Histidyl-tRNA synthetase	2	2	2	2	2	2	2	2	2	2
PF13472	Domain	Lipase_GDSL_2	GDSL-like Lipase/Acylhydrolase family	2	2	1	2	2	2	2	2	2	2
PF13489	Domain	Methyltransf_23	Methyltransferase domain	2	2	2	3	2	2	3	2	2	3
PF13517	Repeat	VCBS	Repeat domain in Vibrio, Colwellia, Bradyrhizobium and Shewanella	2	1	2	2	1	2	1	2	2	2
PF13522	Domain	GATase_6	Glutamine amidotransferase domain	2	2	2	2	2	2	2	2	2	2
PF13599	Repeat	Pentapeptide_4	Pentapeptide repeats (9 copies)	2	1	1	2	1	2	2	2	2	2
PF13602	Domain	ADH_zinc_N_2	Zinc-binding dehydrogenase	2	2	2	2	2	2	1	1	2	2
PF13676	Domain	TIR_2	TIR domain	2	2	2	2	2	2	2	2	2	2
PF13679	Domain	Methyltransf_32	Methyltransferase domain	2	2	1	2	2	2	2	2	2	2
PF13704	Family	Glyco_tranf_2_4	Glycosyl transferase family 2	2	2	2	2	2	2	2	2	2	2
PF13778	Family	DUF4174	Domain of unknown function (DUF4174)	2	2	2	2	2	2	2	2	2	2
PF13836	Domain	DUF4195	Domain of unknown function (DUF4195)	2	2	2	2	1	2	2	2	2	2
PF13850	Domain	ERGIC_N	Endoplasmic Reticulum-Golgi Intermediate Compartment (ERGIC)	2	1	2	2	2	2	2	2	2	2
PF13877	Domain	RPAP3_C	Potential Monad-binding region of RPAP3	2	2	2	2	2	1	2	2	2	2
PF13878	Domain	zf-C2H2_3	zinc-finger of acetyl-transferase ESCO	2	1	1	1	1	1	1	1	1	2
PF13880	Domain	Acetyltransf_13	ESCO1/2 acetyl-transferase	2	1	1	1	1	1	1	1	1	2
PF13886	Family	DUF4203	Domain of unknown function (DUF4203)	2	2	2	2	1	2	1	2	2	2
PF13896	Domain	Glyco_transf_49	Glycosyl-transferase for dystroglycan	2	2	2	2	2	1	2	2	2	2
PF13905	Domain	Thioredoxin_8	Thioredoxin-like	2	2	2	2	2	2	2	2	2	2
PF13907	Domain	DUF4208	Domain of unknown function (DUF4208)	2	2	2	2	2	2	2	2	2	2
PF13911	Domain	AhpC-TSA_2	AhpC/TSA antioxidant enzyme	2	2	2	2	2	2	2	2	2	2
PF13918	Domain	PLDc_3	PLD-like domain	2	2	2	2	2	2	2	2	2	1
PF13919	Domain	ASXH	Asx homology domain	2	2	2	2	2	2	2	2	2	2
PF13926	Family	DUF4211	Domain of unknown function (DUF4211)	2	2	2	2	2	2	2	2	2	2
PF13967	Family	RSN1_TM	Late exocytosis, associated with Golgi transport	2	2	2	2	1	2	2	2	2	2
PF14291	Family	DUF4371	Domain of unknown function (DUF4371)	2	1	2	1	1	1	1	1	1	1
PF14360	Domain	PAP2_C	PAP2 superfamily C-terminal	2	2	2	2	2	2	2	2	2	2
PF14523	Domain	Syntaxin_2	Syntaxin-like protein	2	2	2	2	2	1	2	1	2	2
PF14603	Domain	hSH3	Helically-extended SH3 domain	2	2	2	2	2	2	2	2	2	2
PF14645	Family	Chibby	Chibby family	2	2	2	2	2	2	2	1	2	2
PF14703	Domain	PHM7_cyt	Cytosolic domain of 10TM putative phosphate transporter	2	2	2	2	1	2	2	2	2	2
PF14716	Domain	HHH_8	Helix-hairpin-helix domain	2	2	2	2	2	3	2	2	2	2
PF14719	Domain	PID_2	Phosphotyrosine interaction domain (PTB/PID)	2	2	2	2	2	2	2	2	2	2
PF14722	Family	KRAP_IP3R_bind	Ki-ras-induced actin-interacting protein-IP3R-interacting domain	2	2	2	2	2	2	2	2	2	2
PF14748	Domain	P5CR_dimer	Pyrroline-5-carboxylate reductase dimerisation	2	2	2	2	2	2	2	2	2	2
PF14792	Domain	DNA_pol_B_palm	DNA polymerase beta palm	2	2	2	2	2	3	2	2	2	2
PF14818	Family	DUF4482	Domain of unknown function (DUF4482)	2	2	2	2	2	2	2	2	2	2
PF14851	Family	FAM176	FAM176 family	2	2	2	2	2	2	2	2	3	2
PF14916	Coiled-coil	CCDC92	Coiled-coil domain of unknown function	2	2	1	2	1	2	1	2	2	2
PF14927	Family	Neurensin	Neurensin	2	1	2	2	2	2	2	2	2	2
PF14938	Domain	SNAP	Soluble NSF attachment protein, SNAP	2	2	2	2	2	2	2	2	2	2
PF14977	Family	FAM194	FAM194 protein	2	2	2	2	1	2	2	2	2	2
PF14979	Family	TMEM52	Transmembrane 52	2	1	1	1	1	1	1	1	1	1
PF14998	Family	Ripply	Transcription Regulator	2	1	2	2	2	2	2	2	2	2
PF15035	Family	Rootletin	Ciliary rootlet component, centrosome cohesion	2	2	2	1	2	2	2	2	2	2
PF15037	Family	IL17_R_N	Interleukin-17 receptor extracellular region	2	2	2	2	1	2	2	1	2	2
PF15235	Family	GRIN_C	G protein-regulated inducer of neurite outgrowth C-terminus	2	1	2	2	1	1	2	2	2	2
PF15237	Family	PTRF_SDPR	PTRF/SDPR family	2	2	2	2	2	2	2	2	2	2
PF15275	Family	PEHE	PEHE domain	2	2	2	2	2	2	2	2	2	2
PF15297	Family	CKAP2_C	Cytoskeleton-associated protein 2 C-terminus	2	2	2	1	1	1	1	1	1	1
PF15309	Family	ALMS_motif	ALMS motif	2	2	2	2	2	2	2	1	2	2
PF15330	Family	SIT	SHP2-interacting transmembrane adaptor protein, SIT	2	2	1	2	2	1	2	2	2	2
PF15336	Family	Auts2	Autism susceptibility gene 2 protein	2	2	2	2	2	2	2	2	2	2
PF15388	Family	FAM117	Protein Family FAM117	2	2	2	2	2	2	2	2	2	2
PF15439	Family	NYAP_N	Neuronal tyrosine-phosphorylated phosphoinositide-3-kinase adapter	2	2	2	2	2	2	2	2	2	2
PF15440	Family	THRAP3_BCLAF1	THRAP3/BCLAF1 family	2	2	2	2	2	1	2	2	2	2
PF15477	Family	SMAP	Small acidic protein family	2	2	2	2	2	2	2	2	2	2
PF15739	Family	TSNAXIP1_N	Translin-associated factor X-interacting N-terminus	2	1	2	2	2	2	2	2	2	2
PF15898	Family	PRKG1_interact	cGMP-dependent protein kinase interacting domain	2	2	2	2	2	2	2	2	1	2
PF15903	Family	PL48	Filopodia upregulated, FAM65	2	2	2	2	2	2	2	2	2	2
PF16000	Family	CARMIL_C	CARMIL C-terminus	2	2	2	2	2	2	2	2	2	2
PF16016	Family	VASt	VAD1 Analog of StAR-related lipid transfer domain	2	2	2	2	2	2	2	2	2	2
PF16019	Family	CSRNP_N	Cysteine/serine-rich nuclear protein N-terminus	2	2	2	2	2	2	2	2	2	2
PF16034	Family	JAKMIP_CC3	JAKMIP CC3 domain	2	2	2	2	2	2	2	2	2	2
PF16190	Domain	E1_FCCH	Ubiquitin-activating enzyme E1 FCCH domain	2	2	2	2	2	2	2	2	2	2
PF16191	Domain	E1_4HB	Ubiquitin-activating enzyme E1 four-helix bundle	2	2	2	2	2	2	2	2	2	2
PF16274	Domain	Qua1	Qua1 domain	2	1	2	2	2	1	2	2	2	2
PF16350	Family	FAO_M	FAD dependent oxidoreductase central domain	2	2	2	2	2	2	2	2	2	2
PF16363	Domain	GDP_Man_Dehyd	GDP-mannose 4,6 dehydratase	2	2	2	2	2	2	2	2	2	3
PF16422	Domain	COE1_DBD	Transcription factor COE1 DNA-binding domain	2	2	2	2	2	1	2	2	2	2
PF16453	Domain	IQ_SEC7_PH	PH domain	2	2	2	2	2	2	2	2	2	2
PF16454	Domain	PI3K_P85_iSH2	Phosphatidylinositol 3-kinase regulatory subunit P85 inter-SH2 domain	2	2	2	2	1	2	2	2	2	2
PF16484	Domain	CPT_N	Carnitine O-palmitoyltransferase N-terminus	2	2	1	2	2	2	2	2	2	2
PF16494	Family	Na_Ca_ex_C	C-terminal extension of sodium/calcium exchanger domain	2	2	2	2	2	2	2	2	2	2
PF16511	Domain	FERM_f0	N-terminal or F0 domain of Talin-head FERM	2	3	3	3	3	2	3	3	3	3
PF16566	Domain	CREPT	Cell-cycle alteration and expression-elevated protein in tumour	2	2	2	2	2	2	2	2	2	2
PF16568	Domain	Sam68-YY	Tyrosine-rich domain of Sam68	2	2	1	2	2	2	1	2	2	2
PF16608	Disordered	TNRC6-PABC_bdg	TNRC6-PABC binding domain	2	2	2	2	1	2	2	2	2	2
PF16644	Domain	NEXCaM_BD	Regulatory region of Na+/H+ exchanger NHE binds to calmodulin	2	2	2	2	2	2	2	2	2	2
PF16661	Domain	Lactamase_B_6	Metallo-beta-lactamase superfamily domain	2	2	2	2	2	2	2	2	2	2
PF16665	Disordered	NCOA_u2	Unstructured region on nuclear receptor coactivator protein	2	2	2	2	2	2	2	2	2	2
PF16676	Domain	FOXO-TAD	Transactivation domain of FOXO protein family	2	2	2	2	2	2	2	2	2	2
[truncated: 4,072 more rows]

## Sheet: S3B-domain complexity index =2
Table S3B- List showing the number of proteins in a proteome with a specific functional domain combination (complexity index 2); Highlighted in green are domain combinations specific to any one Afrotherian species. Highlighted in yellow are potentially interesting domain combinations that vary among the species studied here.
Domain combinations	Domain description	L. africana	T. manatus	O. afer	C. asiatica	E. edwardii	E. telfairi	H. sapiens	M. musculus	E. caballus	B. taurus
PF00010_PF00989	HLH~PAS	1
PF00020_PF01406	TNFR_c6~tRNA-synt_1e	1
PF00057_PF00629	Ldl_recept_a~MAM	1
PF00092_PF06668	VWA~ITI_HC_C	1
PF00096_PF00046	zf-C2H2~Homeobox	1
PF00096_PF12171	zf-C2H2~zf-C2H2_jaz	1
PF00169_PF00130	PH~C1_1	1
PF00219_PF13365	IGFBP~Trypsin_2	1
PF00271_PF00476	Helicase_C~DNA_pol_A	1
PF00307_PF00681	CH~Plectin	1
PF00350_PF12763	Dynamin_N~EF-hand_4	1
PF00403_PF00702	HMA~Hydrolase	1
PF00435_PF15410	Spectrin~PH_9	1
PF00520_PF11933	Ion_trans~Na_trans_cytopl	1
PF00520_PF16905	Ion_trans~GPHH	1
PF00595_PF00536	PDZ~SAM_1	1
PF00595_PF10600	PDZ~PDZ_assoc	1
PF00627_PF09280	UBA~XPC-binding	1
PF00628_PF12269	PHD~zf-CpG_bind_C	1
PF00631_PF00615	G-gamma~RGS	1
PF00643_PF00400	zf-B_box~WD40	1
PF00667_PF00175	FAD_binding_1~NAD_binding_1	1
PF01067_PF13833	Calpain_III~EF-hand_8	1
PF01119_PF00505	DNA_mis_repair~HMG_box	1
PF01255_PF01101	Prenyltransf~HMG14_17	1
PF01266_PF16350	DAO~FAO_M	1
PF01302_PF16607	CAP_GLY~CYLD_phos_site	1
PF01401_PF13426	Peptidase_M2~PAS_9	1
PF01404_PF07699	Ephrin_lbd~Ephrin_rec_like	1
PF01412_PF13637	ArfGap~Ank_4	1
PF01414_PF00008	DSL~EGF	1
PF01471_PF00045	PG_binding_1~Hemopexin	1
PF01699_PF16494	Na_Ca_ex~Na_Ca_ex_C	1
PF01968_PF02538	Hydantoinase_A~Hydantoinase_B	1
PF02023_PF03221	SCAN~HTH_Tnp_Tc5	1
PF02078_PF02750	Synapsin~Synapsin_C	1
PF02185_PF00595	HR1~PDZ	1
PF02295_PF00035	z-alpha~dsrm	1
PF02337_PF00552	Gag_p10~IN_DBD_C	1
PF02885_PF00591	Glycos_trans_3N~Glycos_transf_3	1
PF03024_PF00530	Folate_rec~SRCR	1
PF06367_PF02205	Drf_FH3~WH2	1
PF06512_PF00520	Na_trans_assoc~Ion_trans	1
PF07651_PF16515	ANTH~HIP1_clath_bdg	1
PF07653_PF00625	SH3_2~Guanylate_kin	1
PF07686_PF01825	V-set~GPS	1
PF07885_PF02888	Ion_trans_2~CaMBD	1
PF08356_PF08355	EF_assoc_2~EF_assoc_1	1
PF08454_PF13833	RIH_assoc~EF-hand_8	1
PF10344_PF10351	Fmp27~Apt1	1
PF10581_PF02078	Synapsin_N~Synapsin	1
PF11825_PF00105	Nuc_recep-AF1~zf-C4	1
PF11969_PF01170	DcpS_C~UPF0020	1
PF11971_PF08683	CAMSAP_CH~CAMSAP_CKK	1
PF12346_PF12347	HJURP_mid~HJURP_C	1
PF12457_PF07842	TIP_N~GCFC	1
PF12796_PF07653	Ank_2~SH3_2	1
PF13246_PF00689	Cation_ATPase~Cation_ATPase_C	1
PF13306_PF13855	LRR_5~LRR_8	1
PF13330_PF13927	Mucin2_WxxW~Ig_3	1
PF13385_PF15787	Laminin_G_3~DUF4704	1
PF13415_PF01344	Kelch_3~Kelch_1	1
PF13415_PF13854	Kelch_3~Kelch_5	1
PF13520_PF17490	AA_permease_2~Tnp_22_dsRBD	1
PF13606_PF12796	Ank_3~Ank_2	1
PF13887_PF13888	MRF_C1~MRF_C2	1
PF14513_PF13499	DAG_kinase_N~EF-hand_7	1
PF14559_PF00226	TPR_19~DnaJ	1
PF14575_PF07714	EphA2_TM~Pkinase_Tyr	1
PF15046_PF09668	DUF4532~Asp_protease	1
PF15410_PF00620	PH_9~RhoGAP	1
PF16489_PF00002	GAIN~7tm_2	1
PF16511_PF12796	FERM_f0~Ank_2	1
PF16631_PF00098	TUTF7_u4~zf-CCHC	1
PF03372_PF00620	Exo_endo_phos~RhoGAP		2
PF16746_PF00169	BAR_3~PH		2
PF00004_PF01545	AAA~Cation_efflux		1
PF00008_PF00089	EGF~Trypsin		1
PF00036_PF13833	EF-hand_1~EF-hand_8		1
PF00054_PF00008	Laminin_G_1~EGF		1
PF00069_PF00566	Pkinase~RabGAP-TBC		1
PF00069_PF00612	Pkinase~IQ		1
PF00069_PF01023	Pkinase~S_100		1
PF00225_PF01852	Kinesin~START		1
PF00431_PF00754	CUB~F5_F8_type_C		1
PF00435_PF08726	Spectrin~EFhand_Ca_insen		1
PF00454_PF02260	PI3_PI4_kinase~FATC		1
PF00503_PF00001	G-alpha~7tm_1		1
PF00568_PF02205	WH1~WH2		1
PF00595_PF00621	PDZ~RhoGEF		1
PF00595_PF08687	PDZ~ASD2		1
PF00610_PF00615	DEP~RGS		1
PF00621_PF15405	RhoGEF~PH_5		1
PF00698_PF14765	Acyl_transf_1~PS-DH		1
PF00989_PF14598	PAS~PAS_11		1
PF01363_PF00610	FYVE~DEP		1
PF01392_PF00057	Fz~Ldl_recept_a		1
PF01400_PF00431	Astacin~CUB		1
PF02023_PF00021	SCAN~UPAR_LY6		1
PF02210_PF00041	Laminin_G_2~fn3		1
PF03834_PF00633	Rad10~HHH		1
PF04727_PF16457	ELMO_CED12~PH_12		1
PF06839_PF00176	zf-GRF~SNF2_N		1
PF07648_PF13365	Kazal_2~Trypsin_2		1
PF07677_PF01759	A2M_recep~NTR		1
PF07719_PF13414	TPR_2~TPR_11		1
PF09379_PF08736	FERM_N~FA		1
PF09382_PF00570	RQC~HRDC		1
PF09790_PF04084	Hyccin~ORC2		1
PF10569_PF07677	Thiol-ester_cl~A2M_recep		1
PF11640_PF02259	TAN~FAT		1
PF12409_PF00122	P5-ATPase~E1-E2_ATPase		1
PF12717_PF00514	Cnd1~Arm		1
PF12769_PF02233	PNTB_4TM~PNTB		1
PF13202_PF13015	EF-hand_5~PRKCSH_1		1
PF13431_PF13432	TPR_17~TPR_16		1
PF13637_PF14604	Ank_4~SH3_9		1
PF13853_PF13180	7tm_4~PDZ_2		1
PF14513_PF00130	DAG_kinase_N~C1_1		1
PF14767_PF14768	RPA_interact_M~RPA_interact_C		1
PF14964_PF00096	DUF4507~zf-C2H2		1
PF16209_PF00122	PhoLip_ATPase_N~E1-E2_ATPase		1
PF16500_PF00134	Cyclin_N2~Cyclin_N		1
PF16717_PF00249	RAC_head~Myb_DNA-binding		1
PF17208_PF12140	RBR~SLED		1
PF00009_PF09173	GTP_EFTU~eIF2_C			1
PF00046_PF07686	Homeobox~V-set			1
PF00051_PF01822	Kringle~WSC			1
PF00097_PF00400	zf-C3HC4~WD40			1
PF00136_PF14260	DNA_pol_B~zf-C4pol			1
PF00166_PF03637	Cpn10~Mob1_phocein			1
PF00168_PF00620	C2~RhoGAP			1
PF00169_PF00780	PH~CNH			1
PF00200_PF08516	Disintegrin~ADAM_CR			1
PF00249_PF09316	Myb_DNA-binding~Cmyb_C			1
PF00258_PF00175	Flavodoxin_1~NAD_binding_1			1
PF00262_PF12763	Calreticulin~EF-hand_4			1
PF00271_PF04408	Helicase_C~HA2			1
PF00271_PF13959	Helicase_C~DUF4217			1
PF00515_PF13414	TPR_1~TPR_11			1
PF00568_PF00786	WH1~PBD			1
PF00610_PF00631	DEP~G-gamma			1
PF00612_PF00632	IQ~HECT			1
PF00616_PF13716	RasGAP~CRAL_TRIO_2			1
PF00629_PF00041	MAM~fn3			1
PF00640_PF11830	PID~DUF3350			1
PF00900_PF00467	Ribosomal_S4e~KOW			1
PF01064_PF08515	Activin_recp~TGF_beta_GS			1
PF01392_PF13620	Fz~CarboxypepD_reg			1
PF01424_PF08675	R3H~RNA_bind			1
PF02196_PF07714	RBD~Pkinase_Tyr			1
PF02366_PF02815	PMT~MIR			1
PF02366_PF16192	PMT~PMT_4TMC			1
PF02545_PF16864	Maf~Dimerisation2			1
PF02817_PF00198	E3_binding~2-oxoacid_dh			1
PF02864_PF00017	STAT_bind~SH2			1
PF03291_PF02093	Pox_MCEL~Gag_p30			1
PF03516_PF01023	Filaggrin~S_100			1
PF04055_PF06463	Radical_SAM~Mob_synth_C			1
PF04658_PF09026	TAFII55_N~CENP-B_dimeris			1
PF04851_PF00271	ResIII~Helicase_C			1
PF06017_PF14604	Myosin_TH1~SH3_9			1
PF06294_PF00406	CH_2~ADK			1
PF07645_PF12947	EGF_CA~EGF_3			1
PF07728_PF00092	AAA_5~VWA			1
PF08385_PF08393	DHC_N1~DHC_N2			1
PF09174_PF00400	Maf1~WD40			1
PF10581_PF02750	Synapsin_N~Synapsin_C			1
PF10613_PF10565	Lig_chan-Glu_bd~NMDAR2_C			1
PF11232_PF11244	Med25~Med25_NR-box			1
PF12796_PF00531	Ank_2~Death			1
PF13181_PF07719	TPR_8~TPR_2			1
PF13229_PF05048	Beta_helix~NosD			1
PF13853_PF02093	7tm_4~Gag_p30			1
PF13920_PF06803	zf-C3HC4_3~DUF1232			1
PF14538_PF02985	Raptor_N~HEAT			1
PF14658_PF05781	EF-hand_9~MRVI1			1
PF15066_PF10224	CAGE1~DUF2205			1
PF15372_PF00010	DUF4600~HLH			1
PF15780_PF00612	ASH~IQ			1
PF15879_PF14469	MWFE~AKAP28			1
PF16470_PF00082	S8_pro-domain~Peptidase_S8			1
PF16860_PF05676	CX9C~NDUF_B7			1
PF00063_PF00612	Myosin_head~IQ				1
PF00076_PF03344	RRM_1~Daxx				1
PF00076_PF08777	RRM_1~RRM_3				1
PF00092_PF00014	VWA~Kunitz_BPTI				1
PF00096_PF13593	zf-C2H2~SBF_like				1
PF00125_PF05773	Histone~RWD				1
PF00152_PF10257	tRNA-synt_2~RAI16-like				1
PF00270_PF00227	DEAD~Proteasome				1
PF00270_PF02889	DEAD~Sec63				1
PF00335_PF03247	Tetraspannin~Prothymosin				1
PF00385_PF05033	Chromo~Pre-SET				1
PF00439_PF00505	Bromodomain~HMG_box				1
PF00498_PF08599	FHA~Nbs1_C				1
PF00514_PF00153	Arm~Mito_carr				1
PF00520_PF16885	Ion_trans~CAC1F_C				1
PF00551_PF02911	Formyl_trans_N~Formyl_trans_C				1
PF00643_PF00439	zf-B_box~Bromodomain				1
PF00784_PF07653	MyTH4~SH3_2				1
PF00838_PF00010	TCTP~HLH				1
PF01302_PF01198	CAP_GLY~Ribosomal_L31e				1
PF02199_PF03489	SapA~SapB_2				1
PF02337_PF13853	Gag_p10~7tm_4				1
PF02376_PF13853	CUT~7tm_4				1
PF02771_PF00441	Acyl-CoA_dh_N~Acyl-CoA_dh_1				1
PF02820_PF12618	MBT~DUF3776				1
PF03144_PF03143	GTP_EFTU_D2~GTP_EFTU_D3				1
PF03700_PF00787	Sorting_nexin~PX				1
PF03810_PF13646	IBN_N~HEAT_2				1
PF04055_PF13394	Radical_SAM~Fer4_14				1
PF04086_PF00448	SRP-alpha_N~SRP54				1
PF04908_PF06102	SH3BGR~DUF947				1
PF05743_PF00056	UEV~Ldh_1_N				1
PF07645_PF00054	EGF_CA~Laminin_G_1				1
PF07645_PF14670	EGF_CA~FXa_inhibition				1
PF07670_PF07662	Gate~Nucleos_tra2_C				1
PF08614_PF06818	ATG16~Fez1				1
PF08687_PF13903	ASD2~Claudin_2				1
PF10591_PF00086	SPARC_Ca_bdg~Thyroglobulin_1				1
PF13181_PF08238	TPR_8~Sel1				1
PF13385_PF01825	Laminin_G_3~GPS				1
PF13424_PF13181	TPR_12~TPR_8				1
PF13431_PF14559	TPR_17~TPR_19				1
PF13516_PF13927	LRR_6~Ig_3				1
PF13634_PF04096	Nucleoporin_FG~Nucleoporin2				1
PF13920_PF00643	zf-C3HC4_3~zf-B_box				1
PF14843_PF01352	GF_recep_IV~KRAB				1
PF15186_PF03920	TEX13~TLE_N				1
PF15227_PF02190	zf-C3HC4_4~LON_substr_bdg				1
PF15623_PF00956	CT47~NAP				1
PF15927_PF12366	Casc1_N~Casc1				1
PF15949_PF13180	DUF4757~PDZ_2				1
PF15982_PF02466	TMEM135_C_rich~Tim17				1
PF16360_PF01926	GTP-bdg_M~MMR_HSR1				1
PF03921_PF08205	ICAM_N~C2-set_2					2
PF00004_PF13637	AAA~Ank_4					1
PF00006_PF00306	ATP-synt_ab~ATP-synt_ab_C					1
PF00010_PF02344	HLH~Myc-LZ					1
PF00017_PF03227	SH2~GILT					1
PF00017_PF07653	SH2~SH3_2					1
PF00041_PF06328	fn3~Lep_receptor_Ig					1
PF00046_PF00240	Homeobox~ubiquitin					1
PF00076_PF05391	RRM_1~Lsm_interact					1
PF00125_PF13564	Histone~DoxX_2					1
PF00130_PF00781	C1_1~DAGK_cat					1
PF00137_PF04615	ATP-synt_C~Utp14					1
PF00168_PF00130	C2~C1_1					1
PF00179_PF00338	UQ_con~Ribosomal_S10					1
PF00271_PF02889	Helicase_C~Sec63					1
PF00271_PF08061	Helicase_C~P68HR					1
PF00338_PF13893	Ribosomal_S10~RRM_5					1
PF00397_PF08236	WW~SRI					1
PF00406_PF05186	ADK~Dpy-30					1
PF00474_PF00935	SSF~Ribosomal_L44					1
PF00575_PF07717	S1~OB_NTP_bind					1
PF00631_PF14645	G-gamma~Chibby					1
PF00641_PF13920	zf-RanBP~zf-C3HC4_3					1
PF00656_PF01335	Peptidase_C14~DED					1
PF00702_PF16212	Hydrolase~PhoLip_ATPase_C					1
PF00797_PF00096	Acetyltransf_2~zf-C2H2					1
PF00855_PF00505	PWWP~HMG_box					1
PF00858_PF01194	ASC~RNA_pol_N					1
PF01031_PF02212	Dynamin_M~GED					1
PF01033_PF01223	Somatomedin_B~Endonuclease_NS					1
PF01198_PF11878	Ribosomal_L31e~DUF3398					1
PF01283_PF00071	Ribosomal_S26e~Ras					1
PF01390_PF00378	SEA~ECH_1					1
PF01391_PF00229	Collagen~TNF					1
PF01480_PF00076	PWI~RRM_1					1
PF01500_PF13885	Keratin_B2~Keratin_B2_2					1
PF01602_PF16381	Adaptin_N~Coatomer_g_Cpla					1
PF02038_PF00096	ATP1G1_PLM_MAT8~zf-C2H2					1
PF02141_PF03455	DENN~dDENN					1
PF02194_PF00787	PXA~PX					1
PF02201_PF00641	SWIB~zf-RanBP					1
PF02518_PF15770	HATPase_c~DUF4699					1
PF02878_PF02879	PGM_PMM_I~PGM_PMM_II					1
PF02881_PF00448	SRP54_N~SRP54					1
PF03463_PF03464	eRF1_1~eRF1_2					1
PF03464_PF03465	eRF1_2~eRF1_3					1
PF05383_PF08777	La~RRM_3					1
PF06480_PF01434	FtsH_ext~Peptidase_M41					1
PF07686_PF02798	V-set~GST_N					1
PF07713_PF01585	DUF1604~G-patch					1
PF07719_PF13432	TPR_2~TPR_16					1
PF08033_PF04815	Sec23_BS~Sec23_helical					1
PF08205_PF07686	C2-set_2~V-set					1
PF08205_PF13895	C2-set_2~Ig_2					1
PF08368_PF08373	FAST_2~RAP					1
PF08416_PF14604	PTB~SH3_9					1
PF08563_PF00870	P53_TAD~P53					1
PF08711_PF15693	Med26~Med26_C					1
PF09072_PF00090	TMA7~TSP_1					1
PF09380_PF00769	FERM_C~ERM					1
PF10206_PF01951	WRW~Archease					1
PF12656_PF10267	G-patch_2~Tmemb_cc2					1
PF12738_PF00533	PTCB-BRCT~BRCT					1
PF12796_PF12001	Ank_2~DUF3496					1
PF12937_PF05365	F-box-like~UCR_UQCRX_QCR9					1
PF13414_PF07719	TPR_11~TPR_2					1
PF13853_PF09341	7tm_4~Pcc1					1
PF13855_PF00002	LRR_8~7tm_2					1
PF13855_PF00531	LRR_8~Death					1
PF13855_PF01596	LRR_8~Methyltransf_3					1
PF13927_PF00047	Ig_3~ig					1
PF14559_PF05794	TPR_19~Tcp11					1
PF14762_PF14763	HPS3_Mid~HPS3_C					1
PF15186_PF03719	TEX13~Ribosomal_S5_C					1
PF15440_PF09405	THRAP3_BCLAF1~Btz					1
PF15949_PF00595	DUF4757~PDZ					1
PF16214_PF00211	AC_N~Guanylate_cyc					1
PF16508_PF08599	NIBRIN_BRCT_II~Nbs1_C					1
PF16519_PF02816	TRPM_tetra~Alpha_kinase					1
PF16638_PF00096	Tristanin_u2~zf-C2H2					1
PF16646_PF00615	AXIN1_TNKS_BD~RGS					1
PF16681_PF10420	Ig_5~IL12p40_C					1
PF01094_PF07562	ANF_receptor~NCD3G						3
PF00781_PF00609	DAGK_cat~DAGK_acc						2
PF01556_PF00684	DnaJ_C~DnaJ_CXXCXGXG						2
PF01583_PF01747	APS_kinase~ATP-sulfurylase						2
PF00001_PF13853	7tm_1~7tm_4						1
PF00023_PF00520	Ank~Ion_trans						1
PF00023_PF13637	Ank~Ank_4						1
PF00028_PF08374	Cadherin~Protocadherin						1
PF00028_PF16492	Cadherin~Cadherin_C_2						1
PF00043_PF00647	GST_C~EF1G						1
PF00053_PF00055	Laminin_EGF~Laminin_N						1
PF00059_PF07645	Lectin_C~EGF_CA						1
PF00069_PF00581	Pkinase~Rhodanese						1
PF00071_PF12796	Ras~Ank_2						1
PF00078_PF06817	RVT_1~RVT_thumb						1
PF00084_PF07974	Sushi~EGF_2						1
PF00096_PF13853	zf-C2H2~7tm_4						1
PF00096_PF16622	zf-C2H2~zf-C2H2_11						1
PF00106_PF13895	adh_short~Ig_2						1
PF00123_PF00028	Hormone_2~Cadherin						1
PF00169_PF07653	PH~SH3_2						1
PF00178_PF00069	Ets~Pkinase						1
PF00270_PF08152	DEAD~GUCT						1
PF00271_PF08147	Helicase_C~DBP10CT						1
PF00307_PF00210	CH~Ferritin						1
PF00320_PF17226	GATA						1
PF00334_PF07679	NDK~I-set						1
PF00354_PF01221	Pentaxin~Dynein_light						1
PF00365_PF00505	PFK~HMG_box						1
PF00383_PF01781	dCMP_cyt_deam_1~Ribosomal_L38e						1
PF00397_PF15410	WW~PH_9						1
PF00497_PF00060	SBP_bac_3~Lig_chan						1
PF00515_PF00149	TPR_1~Metallophos						1
PF00520_PF00100	Ion_trans~Zona_pellucida						1
PF00530_PF00089	SRCR~Trypsin						1
PF00531_PF07714	Death~Pkinase_Tyr						1
PF00572_PF01352	Ribosomal_L13~KRAB						1
PF00595_PF00620	PDZ~RhoGAP						1
PF00595_PF15936	PDZ~DUF4749						1
PF00613_PF00454	PI3Ka~PI3_PI4_kinase						1
PF00617_PF00788	RasGEF~RA						1
PF00619_PF05180	CARD~zf-DNL						1
PF00621_PF01363	RhoGEF~FYVE						1
PF00631_PF10036	G-gamma~RLL						1
PF00641_PF01585	zf-RanBP~G-patch						1
PF00643_PF00622	zf-B_box~SPRY						1
PF00648_PF00641	Peptidase_C2~zf-RanBP						1
PF00648_PF13833	Peptidase_C2~EF-hand_8						1
PF00653_PF00619	BIR~CARD						1
PF00681_PF00069	Plectin~Pkinase						1
PF00690_PF00122	Cation_ATPase_N~E1-E2_ATPase						1
PF00754_PF13620	F5_F8_type_C~CarboxypepD_reg						1
PF00787_PF00069	PX~Pkinase						1
PF00870_PF07710	P53~P53_tetramer						1
PF01070_PF14047	FMN_dh~DCR						1
PF01074_PF09261	Glyco_hydro_38~Alpha-mann_mid						1
PF01082_PF03712	Cu2_monooxygen~Cu2_monoox_C						1
PF01198_PF04503	Ribosomal_L31e~SSDP						1
PF01200_PF02234	Ribosomal_S28e~CDI						1
PF01266_PF13499	DAO~EF-hand_7						1
PF01283_PF00787	Ribosomal_S26e~PX						1
PF01284_PF00481	MARVEL~PP2C						1
PF01352_PF12756	KRAB~zf-C2H2_2						1
PF01388_PF11717	ARID~Tudor-knot						1
PF01462_PF12799	LRRNT~LRR_4						1
PF01479_PF00900	S4~Ribosomal_S4e						1
PF01553_PF13202	Acyltransferase~EF-hand_5						1
PF01585_PF14709	G-patch~DND1_DSRM						1
PF01612_PF00570	DNA_pol_A_exo1~HRDC						1
PF01777_PF00002	Ribosomal_L27e~7tm_2						1
PF01794_PF08022	Ferric_reduct~FAD_binding_8						1
PF01926_PF02824	MMR_HSR1~TGS						1
PF02008_PF12269	zf-CXXC~zf-CpG_bind_C						1
PF02010_PF01477	REJ~PLAT						1
PF02022_PF00665	Integrase_Zn~rve						1
PF02070_PF02114	NMU~Phosducin						1
PF02159_PF00104	Oest_recep~Hormone_recep						1
PF02170_PF00636	PAZ~Ribonuclease_3						1
PF02368_PF00071	Big_2~Ras						1
PF02728_PF01179	Cu_amine_oxidN3~Cu_amine_oxid						1
PF02759_PF00018	RUN~SH3_1						1
PF02837_PF00703	Glyco_hydro_2_N~Glyco_hydro_2						1
PF02865_PF00017	STAT_int~SH2						1
PF02865_PF02864	STAT_int~STAT_bind						1
PF02985_PF12348	HEAT~CLASP_N						1
PF03104_PF14260	DNA_pol_B_exo1~zf-C4pol						1
PF03114_PF07686	BAR~V-set						1
PF03372_PF00536	Exo_endo_phos~SAM_1						1
PF03372_PF08952	Exo_endo_phos~DUF1866						1
PF03764_PF00679	EFG_IV~EFG_C						1
PF04389_PF04253	Peptidase_M28~TFR_dimer						1
PF04423_PF13558	Rad50_zn_hook~SbcCD_C						1
PF04505_PF14817	CD225~HAUS5						1
PF04571_PF16876	Lipin_N~Lipin_mid						1
PF04707_PF03765	PRELI~CRAL_TRIO_N						1
PF05064_PF01593	Nsp1_C~Amino_oxidase						1
PF05089_PF12972	NAGLU~NAGLU_C						1
PF05240_PF08210	APOBEC_C~APOBEC_N						1
PF05296_PF04505	TAS2R~CD225						1
PF05406_PF02877	WGR~PARP_reg						1
PF05783_PF01284	DLIC~MARVEL						1
PF05986_PF08686	ADAM_spacer1~PLAC						1
PF06189_PF00106	5-nucleotidase~adh_short						1
PF07392_PF12796	P19Arf_N~Ank_2						1
PF07531_PF08788	TAFH~NHR2						1
PF07653_PF06409	SH3_2~NPIP						1
PF07686_PF00137	V-set~ATP-synt_C						1
PF07690_PF13599	MFS_1~Pentapeptide_4						1
PF07699_PF00431	Ephrin_rec_like~CUB						1
PF07732_PF00394	Cu-oxidase_3~Cu-oxidase						1
PF07959_PF08544	Fucokinase~GHMP_kinases_C						1
PF07988_PF09316	LMSTEN~Cmyb_C						1
PF08487_PF06668	VIT~ITI_HC_C						1
PF08702_PF12160	Fib_alpha~Fibrinogen_aC						1
PF09346_PF04379	SMI1_KNR4~DUF525						1
PF10409_PF00017	PTEN_C2~SH2						1
PF11413_PF08778	HIF-1~HIF-1a_CTAD						1
PF11722_PF05206	zf-TRM13_CCCH~TRM13						1
PF12409_PF00690	P5-ATPase~Cation_ATPase_N						1
PF12497_PF00104	ERbeta_N~Hormone_recep						1
PF12799_PF00625	LRR_4~Guanylate_kin						1
PF12848_PF00005	ABC_tran_Xtn~ABC_tran						1
PF13001_PF12755	Ecm29~Vac14_Fab1_bd						1
PF13233_PF09631	Complex1_LYR_2~Sen15						1
PF13360_PF00069	PQQ_2~Pkinase						1
PF13414_PF00515	TPR_11~TPR_1						1
PF13499_PF03992	EF-hand_7~ABM						1
PF13574_PF00200	Reprolysin_2~Disintegrin						1
PF13837_PF00046	Myb_DNA-bind_4~Homeobox						1
PF13912_PF13909	zf-C2H2_6~zf-H2C2_5						1
PF13927_PF07714	Ig_3~Pkinase_Tyr						1
PF14551_PF17207	MCM_N~MCM_OB						1
PF14670_PF00089	FXa_inhibition~Trypsin						1
PF14716_PF14792	HHH_8~DNA_pol_B_palm						1
PF14783_PF14782	BBS2_Mid~BBS2_C						1
PF16422_PF16423	COE1_DBD~COE1_HLH						1
PF16664_PF14604	STAC2_u1~SH3_9						1
PF16746_PF00640	BAR_3~PID						1
PF16863_PF13802	NtCtMGAM_N~Gal_mutarotas_2						1
PF17095_PF08683	CAMSAP_CC1~CAMSAP_CKK						1
PF12796_PF00022	Ank_2~Actin							2
PF00077_PF00078	RVP~RVT_1							1
PF00097_PF02263	zf-C3HC4~GBP							1
PF00132_PF02020	Hexapep~W2							1
PF00135_PF16058	COesterase~Mucin-like							1
PF00226_PF00631	DnaJ~G-gamma							1
PF00240_PF12689	ubiquitin~Acid_PPase							1
PF00240_PF13637	ubiquitin~Ank_4							1
PF00566_PF00443	RabGAP-TBC~UCH							1
PF00665_PF00552	rve~IN_DBD_C							1
PF00989_PF00233	PAS~PDEase_I							1
PF01105_PF13676	EMP24_GP25L~TIR_2							1
PF01347_PF09172	Vitellogenin_N~DUF1943							1
PF01812_PF00076	5-FTHF_cyc-lig~RRM_1							1
PF02099_PF16619	Josephin~SUIM_assoc							1
PF02985_PF15017	HEAT~WRNPLPNID							1
PF03098_PF00084	An_peroxidase~Sushi							1
PF03501_PF00293	S10_plectin~NUDIX							1
PF04664_PF04680	OGFr_N~OGFr_III							1
PF05729_PF12799	NACHT~LRR_4							1
PF05920_PF07019	Homeobox_KN~Rab5ip							1
PF07654_PF01140	C1-set~Gag_MA							1
PF07679_PF01582	I-set~TIR							1
PF07686_PF00089	V-set~Trypsin							1
PF08585_PF00627	RMI1_N~UBA							1
PF10574_PF01217	UPF0552~Clat_adaptor_s							1
PF10579_PF13424	Rapsyn_N~TPR_12							1
PF12937_PF13229	F-box-like~Beta_helix							1
PF13432_PF00226	TPR_16~DnaJ							1
PF13857_PF00651	Ank_5~BTB							1
PF13857_PF14915	Ank_5~CCDC144C							1
PF15441_PF00621	ARHGEF5_35~RhoGEF							1
PF15663_PF00098	zf-CCCH_3~zf-CCHC							1
PF15695_PF00517	HERV-K_REC~GP41							1
PF16273_PF04969	NuDC~CS							1
PF01140_PF01141	Gag_MA~Gag_p12								4
PF16721_PF00665	zf-H3C2~rve								4
PF09240_PF09294	IL6Ra-bind~Interfer-bind								2
PF00069_PF04144	Pkinase~SCAMP								1
PF00076_PF13639	RRM_1~zf-RING_2								1
PF00092_PF08441	VWA~Integrin_alpha2								1
PF00254_PF13432	FKBP_C~TPR_16								1
PF00307_PF15949	CH~DUF4757								1
PF00385_PF00354	Chromo~Pentaxin								1
PF00397_PF00168	WW~C2								1
PF00431_PF03815	CUB~LCCL								1
PF00595_PF14138	PDZ~COX16								1
PF00621_PF16652	RhoGEF~PH_13								1
PF01189_PF08062	Methyltr_RsmB-F~P120R								1
PF01352_PF02023	KRAB~SCAN								1
PF01794_PF08030	Ferric_reduct~NAD_binding_6								1
PF01835_PF01821	A2M_N~ANATO								1
PF02002_PF11521	TFIIE_alpha~TFIIE-A_C								1
PF02176_PF16673	zf-TRAF~TRAF_BIRC3_bd								1
PF02337_PF00098	Gag_p10~zf-CCHC								1
PF02389_PF01073	Cornifin~3Beta_HSD								1
PF02758_PF15695	PYRIN~HERV-K_REC								1
PF03921_PF13895	ICAM_N~Ig_2								1
PF04500_PF16662	FLYWCH~FLYWCH_u								1
PF04564_PF14634	U-box~zf-RING_5								1
PF05222_PF02233	AlaDh_PNT_N~PNTB								1
PF05605_PF00096	zf-Di19~zf-C2H2								1
PF05773_PF00179	RWD~UQ_con								1
PF07654_PF08205	C1-set~C2-set_2								1
PF08043_PF00412	Xin~LIM								1
PF08241_PF04588	Methyltransf_11~HIG_1_N								1
PF08333_PF00084	DUF1725~Sushi								1
PF09337_PF00665	zf-H2C2~rve								1
PF09791_PF00970	Oxidored-like~FAD_binding_6								1
PF10491_PF06071	Nrf1_DNA-bind~YchF-GTPase_C								1
PF12417_PF00096	DUF3669~zf-C2H2								1
PF12895_PF07719	ANAPC3~TPR_2								1
PF13405_PF13499	EF-hand_6~EF-hand_7								1
PF13445_PF13765	zf-RING_UBOX~PRY								1
PF13646_PF12755	HEAT_2~Vac14_Fab1_bd								1
PF13923_PF00622	zf-C3HC4_2~SPRY								1
PF14555_PF00028	UBA_4~Cadherin								1
PF07645_PF00002	EGF_CA~7tm_2									2
PF00017_PF02204	SH2~VPS9									1
PF00069_PF00149	Pkinase~Metallophos									1
PF00069_PF00169	Pkinase~PH									1
PF00069_PF01704	Pkinase~UDPGP									1
PF00075_PF09337	RNase_H~zf-H2C2									1
PF00094_PF00008	VWD~EGF									1
PF00169_PF00621	PH~RhoGEF									1
PF00333_PF02770	Ribosomal_S5~Acyl-CoA_dh_M									1
PF00569_PF13639	ZZ~zf-RING_2									1
PF00637_PF00153	Clathrin~Mito_carr									1
PF00646_PF00621	F-box~RhoGEF									1
PF01094_PF00211	ANF_receptor~Guanylate_cyc									1
PF02736_PF00063	Myosin_N~Myosin_head									1
PF03221_PF00334	HTH_Tnp_Tc5~NDK									1
PF04326_PF13538	AlbA_2~UvrD_C_2									1
PF05920_PF11569	Homeobox_KN~Homez									1
PF06087_PF03221	Tyr-DNA_phospho~HTH_Tnp_Tc5									1
PF06131_PF10262	DUF963~Rdx									1
PF06743_PF08368	FAST_1~FAST_2									1
PF07500_PF01096	TFIIS_M~TFIIS_C									1
PF07679_PF03098	I-set~An_peroxidase									1
PF07679_PF13895	I-set~Ig_2									1
PF07974_PF07645	EGF_2~EGF_CA									1
PF08313_PF03188	SCA7~Cytochrom_B561									1
PF09380_PF08736	FERM_C~FA									1
PF09380_PF11819	FERM_C~DUF3338									1
PF13854_PF13418	Kelch_5~Kelch_4									1
PF15511_PF00125	CENP-T_C~Histone									1
PF16297_PF00098	DUF4939~zf-CCHC									1
PF00005_PF00153	ABC_tran~Mito_carr										1
PF00041_PF06583	fn3~Neogenin_C										1
PF00050_PF13927	Kazal_1~Ig_3										1
PF00069_PF00531	Pkinase~Death										1
PF00069_PF00627	Pkinase~UBA										1
PF00168_PF00616	C2~RasGAP										1
PF00169_PF07679	PH~I-set										1
PF00211_PF13191	Guanylate_cyc~AAA_16										1
PF00431_PF14670	CUB~FXa_inhibition										1
PF00533_PF07535	BRCT~zf-DBF										1
PF00607_PF14787	Gag_p24~zf-CCHC_5										2
PF00635_PF15780	Motile_Sperm~ASH										1
PF00646_PF10442	F-box~FIST_C										1
PF00646_PF13229	F-box~Beta_helix										1
PF00752_PF12813	XPG_N~XPG_I_2										1
PF01342_PF00536	SAND~SAM_1										1
PF01466_PF13853	Skp1~7tm_4										1
PF01825_PF01477	GPS~PLAT										1
PF02093_PF00078	Gag_p30~RVT_1										1
PF02779_PF16870	Transket_pyr~OxoGdeHyase_C										1
PF07992_PF14759	Pyr_redox_2~Reductase_C										1
PF08409_PF14559	DUF1736~TPR_19										1
PF08953_PF00400	DUF1899~WD40										1
PF09172_PF08742	DUF1943~C8										1
PF09409_PF16678	PUB~HOIP-UBA										1
PF10232_PF01151	Med8~ELO										1
PF13837_PF00012	Myb_DNA-bind_4~HSP70										1
PF13855_PF02389	LRR_8~Cornifin										1
PF13895_PF07679	Ig_2~I-set										1
PF13927_PF09240	Ig_3~IL6Ra-bind										1
PF14559_PF02190	TPR_19~LON_substr_bdg										1
PF14670_PF00058	FXa_inhibition~Ldl_recept_b										1
PF14753_PF00567	FAM221~TUDOR										1
PF15005_PF01352	IZUMO~KRAB										1
PF15181_PF01055	SMRP1~Glyco_hydro_31										1
PF15247_PF00210	SLBP_RNA_bind~Ferritin										1
PF15276_PF08065	PP1_bind~K167R										1
PF13927_PF07679	Ig_3~I-set	2	1	1	1	1	1
PF07714_PF07647	Pkinase_Tyr~SAM_2	2	1
PF01833_PF16423	TIG~COE1_HLH	1	1	2		1	2
PF00498_PF15276	FHA~PP1_bind	1	1	1	1	1	1
PF02145_PF00595	Rap_GAP~PDZ							1	1	1	1
PF08430_PF00250	Forkhead_N~Forkhead							1	1	1	1
PF13445_PF00400	zf-RING_UBOX~WD40							1	1	1	1
PF01352_PF00096	KRAB~zf-C2H2	232	237	153	138	107	107	293	239	207	180
PF13520_PF13906	AA_permease_2~AA_permease_C	6	5	5	6	4	5	4	6	32	29
PF00129_PF07654	MHC_I~C1-set	9	6	16	9	11	7	8	39	13	11
PF12440_PF01454	MAGE_N~MAGE	34	17	6	16	7	8	8	6	18	21
PF00096_PF13912	zf-C2H2~zf-C2H2_6	4	12	22	18	11	10	1	1	1	2
PF07966_PF00026	A1_Propeptide~Asp	7	5	8	7	8	6	6	7	11	30
PF00664_PF00005	ABC_membrane~ABC_tran	22	20	21	20	20	20	20	21	24	43
PF08391_PF00059	Ly49~Lectin_C		2			1	1	2	17	6	2
PF00879_PF00323	Defensin_propep~Defensin_1	1	1	5	1			6	17	3
PF12796_PF14915	Ank_2~CCDC144C							9			2
PF01352_PF09514	KRAB~SSXRD			1			2	1	12		2
PF15371_PF14650	DUF4599~FAM75	6	5	1	5	1		12	3	14	7
PF00125_PF16211	Histone~Histone_H2A_C	24	21	22	21	20	9	21	21	23	25
PF02023_PF00096	SCAN~zf-C2H2	22	24	16	22	16	15	24	17	23	28
PF07686_PF07679	V-set~I-set	6	4	1	4		1	1	14	1	4
PF16497_PF07654	MHC_I_3~C1-set	4	3	3	3	5	6	5	1	13	12
PF00044_PF02800	Gp_dh_N~Gp_dh_C	4	1	12	6	3	10	2	3	2	2
PF07686_PF07654	V-set~C1-set	10	7	6	7	7	7	5	5	14	15
PF02798_PF14497	GST_N~GST_C_3	10	5	3	7	12	6	7	9	13	12
PF08246_PF00112	Inhibitor_I29~Peptidase_C1	9	7	8	9	6	5	7	17	9	7
PF02263_PF02841	GBP~GBP_C	11	8	3	9	4	2	7	10	6	11
PF13895_PF00047	Ig_2~ig	4	5	3	6	3	1	9	9	11	8
PF16208_PF00038	Keratin_2_head~Filament	14	13	14	17	20	9	13	14	18	18
PF03137_PF07648	OATP~Kazal_2	8	5	9	8	10	9	11	17	9	9
PF08266_PF00028	Cadherin_2~Cadherin	12	14	8	9	11	10	5	5	12	8
PF13765_PF00622	PRY~SPRY	6	3	4	8	6	3	2	1	1	9
PF07686_PF13927	V-set~Ig_3	13	9	13	10	17	13	15	13	17	17
PF02758_PF02760	PYRIN~HIN	2	2	3		1	2	4	10	4	1
PF07686_PF08205	V-set~C2-set_2	6	7	7	10	7	7	6	13	13	10
PF07686_PF13895	V-set~Ig_2	2	1	2	5	2	4	9	1	7	5
PF02798_PF00043	GST_N~GST_C	3	7	5	5	5	1	7	10	5	2
PF00501_PF13193	AMP-binding~AMP-binding_C	7	12	12	17	12	12	15	11	13	12
PF00651_PF00096	BTB~zf-C2H2	13	19	20	21	19	20	20	23	19	18
PF00091_PF03953	Tubulin~Tubulin_C	20	17	18	19	17	14	21	19	21	23
PF07686_PF00047	V-set~ig			1	1	1	3	2	8	2
PF00240_PF01599	ubiquitin~Ribosomal_S27	1	1	1	7	7	2	1	1	1	1
PF00413_PF00045	Peptidase_M10~Hemopexin	1	2	4	2	9	4	1	1	2	1
PF08240_PF00107	ADH_N~ADH_zinc_N	10	4	6	5	8	6	9	9	12	9
PF00969_PF07654	MHC_II_beta~C1-set	6	4	7	3	6	2	10	6	8	8
PF09011_PF00505	HMG_box_2~HMG_box	4	4	4	7	11	3	4	5	4	4
PF13912_PF00096	zf-C2H2_6~zf-C2H2	4	5	5	9	4	5	2	6	1	2
PF03939_PF00276	Ribosomal_L23eN~Ribosomal_L23	1	1	1	8		2	1	1	2	2
PF00076_PF13865	RRM_1~FoP_duplication	1	1	1	1	1	1	1	8	1	1
PF00884_PF14707	Sulfatase~Sulfatase_C	5	6	3	8	8	4	8	3	9	6
PF03946_PF00298	Ribosomal_L11_N~Ribosomal_L11	2	2	2	2	9	2	2	2	3	2
PF13895_PF13927	Ig_2~Ig_3	5	2	1	1	2	1	2	3	3	8
PF00076_PF08081	RRM_1~RBM1CTR	3	2	2	2	2	2	9	3	2	3
PF00270_PF00271	DEAD~Helicase_C	26	27	27	26	25	24	30	30	29	27
PF00578_PF10417	AhpC-TSA~1-cysPrx_C	4	4	5	7	10	4	5	5	3	5
PF00096_PF13465	zf-C2H2~zf-H2C2_2	5	4	6	4	8	5	3	1	5	3
PF01412_PF12796	ArfGap~Ank_2	1	2			1		5
PF00993_PF07654	MHC_II_alpha~C1-set	10	5	8	4	5	5	6	4	6	7
PF00240_PF01020	ubiquitin~Ribosomal_L40e	1	1	3	2	7	1	1	2	1	2
PF00333_PF03719	Ribosomal_S5~Ribosomal_S5_C	2	2	3	3	8	3	2	2	2	2
PF15227_PF00643	zf-C3HC4_4~zf-B_box	6	2	3	1	1	2	5	1	1	4
PF00688_PF00019	TGFb_propeptide~TGF_beta	18	18	18	18	19	13	19	19	19	19
PF00704_PF01607	Glyco_hydro_18~CBM_14	2	1	6	5	5	2	2	2	1	2
PF00754_PF02210	F5_F8_type_C~Laminin_G_2	4	3	2	2	4	4	7	7	3	4
PF01391_PF00386	Collagen~C1q	16	16	18	18	16	14	20	17	18	19
PF01773_PF07662	Nucleos_tra2_N~Nucleos_tra2_C	1					1			4
PF06021_PF08444	Gly_acyl_tr_N~Gly_acyl_tr_C	7	3	2	3	5	3	5	4	5	7
PF08079_PF00327	Ribosomal_L30_N~Ribosomal_L30	2	3	4	1	7	3	2	2	2	2
PF12698_PF00005	ABC2_membrane_3~ABC_tran	10	12	11	10	7	8	8	11	10	8
PF02793_PF00002	HRM~7tm_2	14	14	15	12	11	11	15	14	15	15
PF02931_PF02932	Neur_chan_LBD~Neur_chan_memb	20	23	22	22	24	20	25	22	22	24
PF00281_PF00673	Ribosomal_L5~Ribosomal_L5_C	1	1	1	1	6	3	1	3	2	2
PF00008_PF07645	EGF~EGF_CA		1		1	1		5	1	2
PF10587_PF00736	EF-1_beta_acid~EF1_GNE	2	2	2	2	7	2	2	2	2	2
PF08711_PF06881	Med26~Elongin_A	1	1	1	1	1	1	6	1	2	1
PF00157_PF00046	Pou~Homeobox	12	11	13	14	14	12	16	15	15	14
PF01825_PF00002	GPS~7tm_2	9	10	7	10	11	7	7	9	9	11
PF00648_PF01067	Peptidase_C2~Calpain_III	2	3	6	6	6	6	5	6	7	5
PF04419_PF12874	4F5~zf-met		1	1	5	4	2	1	1	1	1
PF13855_PF01582	LRR_8~TIR	11	11	8	11	11	9	10	8	12	8
PF00096_PF01352	zf-C2H2~KRAB	1			3	4	1
PF04775_PF08840	Bile_Hydr_Trans~BAAT_C	5	5	4	5	5	5	5	9	7	7
PF12796_PF07525	Ank_2~SOCS_box	12	13	11	11	12	12	16	11	12	13
PF00128_PF02806	Alpha-amylase~Alpha-amylase_C	2	2	2	1	2		5	5	2	4
PF09162_PF02136	Tap-RNA_bind~NTF2	5	3	1			2	1		1	2
PF00076_PF11627	RRM_1~HnRNPA1	2	1	1	2	2	2	2	2	1	6
PF01477_PF00305	PLAT~Lipoxygenase	3	3	4	6	5	4	5	7	5	7
PF00028_PF01049	Cadherin~Cadherin_C	15	13	14	16	15	14	16	18	14	14
PF02214_PF00520	BTB_2~Ion_trans	16	16	18	18	20	17	19	20	18	19
PF07679_PF13927	I-set~Ig_3	5	6	3	6	6	7	5	8	4	5
PF08523_PF01381	MBF1~HTH_3		1	1	1	5	1	1		1	1
PF00385_PF00378	Chromo~ECH_1	2	2		1	2	2	6	2	2	2
PF00046_PF03826	Homeobox~OAR	12	15	14	15	14	11	15	14	15	15
PF07686_PF00622	V-set~SPRY	1	5		4	3	1		3	3	4
PF02210_PF00008	Laminin_G_2~EGF						1			3
PF12796_PF13637	Ank_2~Ank_4	8	9	9	9	8	7	9	11	11	7
PF00096_PF13894	zf-C2H2~zf-C2H2_4	3	1	5	1	2		1	1	1	1
PF12799_PF13855	LRR_4~LRR_8	1	3	2	1	1			2	5	3
PF15227_PF00622	zf-C3HC4_4~SPRY	3	2	2				5	1	2
PF13927_PF01582	Ig_3~TIR	3	5	3	2	1	1	1		1	2
PF13927_PF13895	Ig_3~Ig_2	4	3	1	3	6	5	3	3	4	3
PF00618_PF00617	RasGEF_N~RasGEF	6	7	5	4	4	5	4	4	4	2
PF01462_PF13855	LRRNT~LRR_8	15	16	16	15	18	16	16	16	18	19
PF02492_PF07683	cobW~CobW_C	1	1	1		1	1	5	1	1	1
PF00385_PF17218	Chromo~CBX7_C	1	3	3	5	4	3	5	4	5	5
PF16564_PF14048	MBDa~MBD_C	2	3	3	5	3	3	6	2	3	2
PF14604_PF07653	SH3_9~SH3_2	2	2	2	4	2	2	6	3	3	2
PF02758_PF05729	PYRIN~NACHT	6	5	5	4	8	5	6	8	5	6
PF00076_PF00658	RRM_1~PABP	3	3	3	4	7	3	4	5	4	3
PF08434_PF00092	CLCA~VWA	1				3	4	1	4	3	2
PF00036_PF13499	EF-hand_1~EF-hand_7	7	5	5	7	6	5	7	9	7	7
PF00134_PF02984	Cyclin_N~Cyclin_C	12	15	13	11	15	14	13	14	14	13
PF00535_PF00652	Glycos_transf_2~Ricin_B_lectin	15	16	18	17	18	18	19	18	18	19
PF13833_PF13499	EF-hand_8~EF-hand_7	9	8	8	9	9	5	7	7	7	8
PF16205_PF00366	Ribosomal_S17_N~Ribosomal_S17	2	1	2	1	4	4	1	1	1	1
PF13637_PF12796	Ank_4~Ank_2	4	4	5	3	5	5	2	5	2	3
PF01023_PF00036	S_100~EF-hand_1	6	6	7	5	6	3	4	4	6	5
PF10613_PF00060	Lig_chan-Glu_bd~Lig_chan	2	3	2	2	1	4	4	3	3	5
PF07679_PF00041	I-set~fn3	7	9	8	10	9	9	8	8	11	8
PF08515_PF00069	TGF_beta_GS~Pkinase	1				1	3
PF07654_PF06623	C1-set~MHC_I_C	3		1	1
PF07562_PF00003	NCD3G~7tm_3			1			3				1
PF02375_PF02373	JmjN~JmjC	5	2	2	3	1	2	2	1	2	2
PF00611_PF00018	FCH~SH3_1	5	3	1	2	3	2	2	4	3	3
PF13895_PF01582	Ig_2~TIR	2	2	2	2	1	1	3	4	4	1
PF00581_PF00782	Rhodanese~DSPc	10	11	11	10	10	7	10	9	10	10
PF13417_PF00043	GST_N_3~GST_C		2		1	1	4	1	2		1
PF00092_PF05587	VWA~Anth_Ig					1		1	3	3	3
PF00169_PF02174	PH~IRS	2	2	4	4	4	1	3	3	2	4
PF00611_PF14604	FCH~SH3_9	3	4	5	4	2	3	6	4	4	4
PF12796_PF00520	Ank_2~Ion_trans	3	5	4	6	5	4	6	6	6	4
PF13417_PF13410	GST_N_3~GST_C_2	5	4	4	5	5	2	5	4	6	5
PF01108_PF09294	Tissue_fac~Interfer-bind	10	7	7	9	9	10	8	8	8	9
PF12284_PF00046	HoxA13_N~Homeobox	2	3	4	4	4	1	4	4	4	4
PF00916_PF01740	Sulfate_transp~STAS	9	11	11	11	10	8	11	11	11	11
PF00653_PF05729	BIR~NACHT	1	1		1		1	1	4	1	1
PF00173_PF00487	Cyt-b5~FA_desaturase	2	4	3	3	4	2	2	4	5	4
PF16891_PF00149	STPPase_N~Metallophos	3	3	3	3	6	2	3	4	3	3
PF03165_PF03166	MH1~MH2	6	7	8	7	8	5	8	8	8	8
PF00339_PF02752	Arrestin_N~Arrestin_C	7	7	8	9	7	9	8	10	9	9
PF13855_PF07679	LRR_8~I-set	8	8	9	11	9	11	9	9	10	9
PF08434_PF13519	CLCA~VWA_2	2		2	4	1	1	1	3	1	2
PF00084_PF00431	Sushi~CUB	2	3	4	2	3	4	2	2	3	5
PF11717_PF05712	Tudor-knot~MRG	1	1	3	1	2		2	3	4	2
PF00619_PF00656	CARD~Peptidase_C14	4	3	4	5	2	3	5	5	5	4
PF00181_PF03947	Ribosomal_L2~Ribosomal_L2_C	1	2	2	2	5	2	2	2	2	2
PF00628_PF02373	PHD~JmjC	1	1	2	3	2	1	3	4	3	2
PF01403_PF01437	Sema~PSI	7	6	8	5	5	6	5	5	5	6
PF01433_PF11838	Peptidase_M1~ERAP1_C	8	8	8	7	8	6	8	7	10	8
PF01352_PF13912	KRAB~zf-C2H2_6							2	3	1
PF00097_PF00622	zf-C3HC4~SPRY					1		3			2
PF12885_PF12886	TORC_M~TORC_C	3	3	1	3	2	3	1	1	1	1
PF02023_PF01352	SCAN~KRAB	2	2	2	4	3	4	2	2	4	4
PF17039_PF00852	Glyco_tran_10_N~Glyco_transf_10	7	5	5	6	6	5	8	5	6	6
PF00010_PF07527	HLH~Hairy_orange	8	9	10	10	10	9	11	10	11	11
PF08205_PF13927	C2-set_2~Ig_3	2	2	2	3	2	5	2	2	2	2
PF04968_PF04969	CHORD~CS	2	2	3	2	2	3	2	2	5	2
PF02784_PF00278	Orn_Arg_deC_N~Orn_DAP_Arg_deC	2	3	2	2	5	3	2	3	2	2
PF09067_PF00041	EpoR_lig-bind~fn3	1	3	3	2	3	2	3	2	1	4
PF03172_PF01342	HSR~SAND	3	3	2		1	1	3	3	3	1
PF00076_PF08080	RRM_1~zf-RNPHF	3	3	3	3	6	4	3	3	3	4
PF00431_PF00084	CUB~Sushi	4	3	3	4	2	2	4	4	3	5
PF00055_PF00053	Laminin_N~Laminin_EGF	6	8	8	6	7	6	6	5	6	6
PF00020_PF00531	TNFR_c6~Death	7	6	7	5	7	5	7	6	8	6
PF00085_PF13848	Thioredoxin~Thioredoxin_6	6	6	7	8	7	8	8	7	9	8
PF00092_PF01839	VWA~FG-GAP		1	2			3	1
PF07808_PF07807	RED_N~RED_C	1	1	1	1	1	1	1	1	4	1
PF00397_PF00632	WW~HECT	3	2	4	4	3	3	2	1	3	2
PF00531_PF00069	Death~Pkinase	3	2	1	3	1	1	3	3	3	3
PF00642_PF00076	zf-CCCH~RRM_1	3	3	2	4	5	4	4	3	2	3
PF12796_PF11904	Ank_2~GPCR_chapero_1	2	3	2	4	1	3	4	3	3	2
PF12796_PF00023	Ank_2~Ank	4	4	6	3	4	5	5	4	3	5
PF00788_PF16517	RA~Nore1-SARAH	3	5	4	3	4	6	5	4	5	4
PF01390_PF00089	SEA~Trypsin	7	7	6	6	8	6	5	7	7	8
PF00654_PF00571	Voltage_CLC~CBS	4	4	4	4	3	4	6	6	4	4
PF16878_PF00046	SIX1_SD~Homeobox	5	8	6	6	7	5	7	6	6	7
PF01839_PF08441	FG-GAP~Integrin_alpha2	6	6	8	7	9	8	7	8	7	7
PF13445_PF00643	zf-RING_UBOX~zf-B_box	7	7	7	6	6	7	9	8	8	8
PF02225_PF13639	PA~zf-RING_2	8	8	9	8	9	6	9	8	8	7
PF01909_PF10421	NTP_transf_2~OAS1_C	1	1	1	1			1	3	1	3
PF16906_PF00467	Ribosomal_L26~KOW	3	2	2	2	4	3	2	1	1	2
PF00130_PF00620	C1_1~RhoGAP	2	2	3	3	1	4	2	2	2	1
PF00621_PF14604	RhoGEF~SH3_9	1	3	2	2	4	1	2	2	2	3
PF00095_PF00014	WAP~Kunitz_BPTI	2	3	1	2	1	2	3	4	2	2
PF08347_PF00505	CTNNB1_binding~HMG_box	2	2	4	3	4	2	4	3	4	4
PF06470_PF02463	SMC_hinge~SMC_N				1		1	1		3	1
PF00520_PF00027	Ion_trans~cNMP_binding	2		1		1	3				1
PF13855_PF13927	LRR_8~Ig_3	2	2	1	1	1	1	3	3	2	3
PF01424_PF12752	R3H~SUZ	2	2	1	1	1	1	3	3	3	2
PF00017_PF07714	SH2~Pkinase_Tyr	6	4	5	4	4	3	4	4	3	4
PF00246_PF13620	Peptidase_M14~CarboxypepD_reg	6	4	3	4	3	5	4	4	4	4
PF00240_PF00627	ubiquitin~UBA	5	5	4	5	7	5	5	4	5	4
PF00804_PF05739	Syntaxin~SNARE	5	7	6	5	5	6	5	6	7	7
PF00056_PF02866	Ldh_1_N~Ldh_1_C	7	6	5	5	5	7	7	6	7	6
PF13499_PF13833	EF-hand_7~EF-hand_8	3	2	1	1		1	1	1	2	3
PF00057_PF01823	Ldl_recept_a~MACPF	2	3	1	1		2	1	1	3	1
PF15508_PF02275	NAAA-beta~CBAH	1	2	2	1	2		2	2	4	2
PF00651_PF13909	BTB~zf-H2C2_5	1	1	1	1	2	1	3	1	3	1
PF01392_PF01534	Fz~Frizzled	9	11	10	11	11	9	11	11	11	11
PF07707_PF01344	BACK~Kelch_1	2	2		1	1	3
PF08711_PF07500	Med26~TFIIS_M	3	1	1	1	1	1	1	1	1	3
PF00041_PF00147	fn3~Fibrinogen_C	3	2	3	2	3	3	1	3	3	1
PF02518_PF00183	HATPase_c~HSP90	3	5	2	4	4	4	3	3	3	3
PF00505_PF12336	HMG_box~SOXp	3	2	4	4	3	2	4	4	4	4
PF01546_PF07687	Peptidase_M20~M20_dimer	5	4	4	4	5	3	6	5	5	5
PF00069_PF00433	Pkinase~Pkinase_C	11	12	9	11	10	10	11	10	10	10
PF07701_PF00211	HNOBA~Guanylate_cyc		3		1	1	2		1		1
PF01562_PF01421	Pep_M12B_propep~Reprolysin	3	1	1	2	2	3	1	1	2
PF05729_PF13516	NACHT~LRR_6	3	3	2	2	1	1	1	1	2	1
PF13426_PF00520	PAS_9~Ion_trans	1	2	2	4	2	2	2	1	2	2
PF01391_PF00147	Collagen~Fibrinogen_C	1	3	1	3	2	1	2	2	1	1
PF03607_PF00069	DCX~Pkinase	3	1	1	2	2	1	2	3	2	3
PF02892_PF05699	zf-BED~Dimer_Tnp_hAT	4	4	2	3	3	2	3	2	2	2
PF12796_PF07714	Ank_2~Pkinase_Tyr	2	3	3	2	1	2	4	2	2	2
PF15494_PF00089	SRCR_2~Trypsin	2	2	4	3	3	2	4	3	3	4
PF08383_PF03131	Maf_N~bZIP_Maf	3	2	3	3	4	2	4	4	4	4
PF00018_PF00017	SH3_1~SH2	4	2	4	3	4	3	4	5	4	4
PF00621_PF00169	RhoGEF~PH	3	3	4	3	3	3	5	4	5	4
PF00307_PF00402	CH~Calponin	5	5	6	6	6	4	6	6	6	7
PF10584_PF00227	Proteasome_A_N~Proteasome	8	8	8	9	9	6	8	8	8	8
PF02148_PF00443	zf-UBP~UCH	7	9	8	9	8	7	8	8	9	7
PF13465_PF00096	zf-H2C2_2~zf-C2H2	2	1	1	2				1		3
PF00047_PF13895	ig~Ig_2	3	1	1	1	1					1
PF07714_PF00211	Pkinase_Tyr~Guanylate_cyc	1	2	1		1	3	1		1
PF02150_PF01096	RNA_POL_M_15KD~TFIIS_C	2	1	2	4	3	2	2	2	2	2
PF00853_PF08504	Runt~RunxI	1	2	3	3	3	1	3	2	2	2
PF01217_PF00928	Clat_adaptor_s~Adap_comp_sub	6	6	6	6	6	5	4	6	6	7
PF00041_PF00102	fn3~Y_phosphatase	5	5	7	5	6	6	5	6	7	6
PF00108_PF02803	Thiolase_N~Thiolase_C	6	4	5	5	5	5	5	7	5	5
PF13733_PF02709	Glyco_transf_7N~Glyco_transf_7C	7	7	7	7	9	7	7	7	8	6
PF00868_PF00927	Transglut_N~Transglut_C	6	7	6	7	8	6	7	8	7	6
PF07648_PF13927	Kazal_2~Ig_3	2	3	1	2	3	1	2	2	1
PF14904_PF10294	FAM86~Methyltransf_16	1	1		1	1		3	1		1
PF13855_PF12799	LRR_8~LRR_4				2	1	2	3	2		1
PF01823_PF00168	MACPF~C2	1		2		3	1	1	1	1	1
PF06418_PF00117	CTP_synth_N~GATase	2	4	1	2	2	2	2	2	2	2
PF12075_PF12796	KN_motif~Ank_2	1	1	1	1			2	2	3	2
PF00653_PF13920	BIR~zf-C3HC4_3	1	1	2	1	2	3	3	2	2	2
PF12894_PF00400	ANAPC4_WD40~WD40	2	3	3	3	4	4	3	2	2	3
PF00595_PF00373	PDZ~FERM_M	1	2	2	1	2	2	3	2	3	3
PF13086_PF13087	AAA_11~AAA_12	4	4	2	2	3	3	3	3	2	3
PF00188_PF08562	CAP~Crisp	2	3	3	3	2	2	3	4	4	3
PF00071_PF07525	Ras~SOCS_box	2	2	2	2	2	2	4	2	2	1
PF00520_PF06512	Ion_trans~Na_trans_assoc	4	2	5	4	4	4	4	4	4	4
PF00046_PF03798	Homeobox~TRAM_LAG1_CLN8	5	5	5	5	6	3	5	5	5	5
PF00063_PF06017	Myosin_head~Myosin_TH1	4	4	6	5	5	4	5	5	6	5
PF00105_PF00104	zf-C4~Hormone_recep	38	37	38	39	38	37	38	39	37	38
PF13202_PF03992	EF-hand_5~ABM	1	2	1	2	1		1	1	3	2
PF00318_PF16122	Ribosomal_S2~40S_SA_C	1	1	1	1	3		2	1	2	1
PF08688_PF08687	ASD1~ASD2	2	1	1	1	1		2	1	2	3
PF00751_PF03474	DM~DMA	2	2	3	3	1		3	3	3	3
PF12417_PF01352	DUF3669~KRAB	2				1
PF00791_PF00531	ZU5~Death	2					1
PF01074_PF07748	Glyco_hydro_38~Glyco_hydro_38C	1					2
PF02736_PF01576	Myosin_N~Myosin_tail_1		1			2
PF00514_PF14381	Arm~EDR1			1		2
PF02709_PF00652	Glyco_transf_7C~Ricin_B_lectin				2		1
PF01421_PF08516	Reprolysin~ADAM_CR				1	2
PF05324_PF00711	Sperm_Ag_HE2~Defensin_beta							2	1
PF00536_PF10534	SAM_1~CRIC_ras_sig								1	2
PF14049_PF14047	Dppa2_A~DCR	1	1			3	1	1	1	1	1
PF00307_PF00435	CH~Spectrin	1	1	3	1	2	1	1	1		1
PF00240_PF02179	ubiquitin~BAG	1	1	1	1	3	1	1	1		2
PF12937_PF04300	F-box-like~FBA	2	2	3	2	2	3	2	3	2	4
PF00054_PF02210	Laminin_G_1~Laminin_G_2	1						2
PF04056_PF07975	Ssl1~C1_4	1	1	1	1			3	1	1	1
PF04218_PF03221	CENP-B_N~HTH_Tnp_Tc5		1	1	1	1		3	1	1	1
PF00188_PF00059	CAP~Lectin_C	1	1	1	1	1	1	3	1
PF00787_PF09325	PX~Vps5	1	2	3	3	3	3	3	2	3	2
PF00642_PF13920	zf-CCCH~zf-C3HC4_3	1	2	3	3	2	3	3	3	3	2
PF01391_PF00059	Collagen~Lectin_C	5	5	5	3	4	4	4	5	5	5
PF04704_PF00096	Zfx_Zfy_act~zf-C2H2						1		2
PF13837_PF00096	Myb_DNA-bind_4~zf-C2H2					1				2
PF02337_PF00607	Gag_p10~Gag_p24					1					2
PF00505_PF09011	HMG_box~HMG_box_2	3	1	2	1	1	1	1	1	1	2
PF03456_PF02141	uDENN~DENN	3	2	2	2	1	1	1	1	2	1
PF13923_PF05605	zf-C3HC4_2~zf-Di19	3	2	3	4	3	2	2	2	3	2
PF00047_PF07714	ig~Pkinase_Tyr	3	3	3	3	3	1	2	3	3	2
PF00168_PF09457	C2~RBD-FIP	2	3	3	3	2	1	3	3	3	3
PF05349_PF00320	GATA-N~GATA	2	3	3	3	2	1	3	3	3	3
PF12444_PF00505	Sox_N~HMG_box	2	3	2	3	3	1	3	3	3	3
PF00415_PF00632	RCC1~HECT	3	4	4	4	4	2	3	3	3	4
PF03114_PF14604	BAR~SH3_9	2	4	4	4	4	4	3	4	3	4
PF15409_PF01237	PH_8~Oxysterol_BP	4	3	4	4	4	2	4	3	4	4
PF00069_PF00659	Pkinase~POLO_box	5	4	4	5	5	3	4	5	5	4
PF00651_PF07707	BTB~BACK	5	4	5	4	4	4	4	5	5	6
PF00169_PF01237	PH~Oxysterol_BP	5	5	5	6	6	5	6	7	5	6
PF10660_PF09360	MitoNEET_N~zf-CDGSH	1	1	1	3		1	1	1	1	1
PF00069_PF02149	Pkinase~KA1	1	1		1	1	3	1	1	1	1
PF08069_PF00312	Ribosomal_S13_N~Ribosomal_S15	1	1	2	1	1	1	1	1	1	3
PF00751_PF15791	DM~DMRT-like	1	2	1	1	1	1	1	1	3	1
PF00683_PF07645	TB~EGF_CA	1	2	3	2	1	2	1	2	2	1
PF12701_PF09532	LSM14~FDF	1		2	3	1	1	2	2	2	2
PF00415_PF13540	RCC1~RCC1_2	1	1	1	2	2	1	2	2	2	3
PF00096_PF13909	zf-C2H2~zf-H2C2_5	3	3	3	2	3	4	2	2	3	2
PF00400_PF04003	WD40~Utp12	2	1	1	2	1	1	2	2	3	2
PF00041_PF00622	fn3~SPRY	2	1	3	2	1	2	2	3	2	2
PF02779_PF02780	Transket_pyr~Transketolase_C	1	2	3	3	2	3	2	3	2	2
PF12796_PF13857	Ank_2~Ank_5	1	3	2	2	2	3	3	2	3	2
PF02173_PF00170	pKID~bZIP_1	4	3	3	4	2	3	3	3	2	3
PF00622_PF07525	SPRY~SOCS_box	2	3	3	3	3	3	3	3	3	1
PF00076_PF00013	RRM_1~KH_1	1	3	3	3	3	2	3	3	3	3
PF03810_PF08389	IBN_N~Xpo1	3	3	4	2	3	2	3	3	4	3
PF00307_PF03271	CH~EB1	3	3	3	3	5	3	3	3	4	3
PF03810_PF13513	IBN_N~HEAT_EZ	2	4	3	3	3	2	3	4	3	3
PF01064_PF00069	Activin_recp~Pkinase	2	2	2	3	2	3	4	3	3	3
PF06472_PF00005	ABC_membrane_2~ABC_tran	4	4	4	4	4	4	4	4	3	2
PF00431_PF00057	CUB~Ldl_recept_a	2	4	4	4	4	3	4	4	4	4
PF01391_PF01410	Collagen~COLFI	5	6	4	5	4	5	4	4	5	5
PF01392_PF01759	Fz~NTR	5	4	5	5	5	3	5	5	5	5
PF00092_PF01391	VWA~Collagen	7	5	6	6	5	5	6	6	6	5
PF13923_PF16207	zf-C3HC4_2~RAWUL	7	6	7	7	7	6	8	7	8	7
PF01273_PF02886	LBP_BPI_CETP~LBP_BPI_CETP_C	9	8	8	9	10	8	9	8	9	9
PF09128_PF00621	RGS-like~RhoGEF	1	1	3	1	1	1	1	1	1	1
PF00240_PF04758	ubiquitin~Ribosomal_S30	1	1	1	1	3	1	1	1	1	1
PF06220_PF00642	zf-U1~zf-CCCH	1	1	1	1	3	1	1	1	1	1
PF00010_PF14598	HLH~PAS_11	1	2	2	1	2	3	2	1	2	2
PF17207_PF00493	MCM_OB~MCM	2	2	2	2	2	4	2	2	2	2
PF00400_PF01363	WD40~FYVE	2	2	2	2	2	2	2	2	4	2
PF02394_PF00340	IL1_propep~IL1	2	2	2	2	2	2	2	2	4	2
PF00595_PF00169	PDZ~PH	2	2	2	1	2	1	2	3	2	1
PF17284_PF01564	Spermine_synth	2	2	3	3	2	1	2	3	2	2
PF12796_PF00013	Ank_2~KH_1	2	2	1	2	2	2	3	2	1	1
PF13499_PF13405	EF-hand_7~EF-hand_6	3	3	3	3	3	2	3	2	2	4
PF01335_PF00656	DED~Peptidase_C14	4	3	3	3	2	3	3	2	3	2
PF13923_PF00595	zf-C3HC4_2~PDZ	2	3	2	4	3	3	3	2	3	3
PF13424_PF13374	TPR_12~TPR_10	2	3	2	4	2	3	3	3	3	3
PF02874_PF00006	ATP-synt_ab_N~ATP-synt_ab	2	2	3	3	4	2	3	3	3	3
PF00076_PF00098	RRM_1~zf-CCHC	3	3	3	3	4	3	4	4	2	3
PF02197_PF00027	RIIa~cNMP_binding	4	4	4	4	4	2	4	4	4	4
PF00370_PF02782	FGGY_N~FGGY_C	5	5	5	6	5	5	4	6	5	6
PF02807_PF00217	ATP-gua_PtransN~ATP-gua_Ptrans	3	4	3	4	4	3	5	4	4	4
PF00069_PF12202	Pkinase~OSR1_C	6	6	6	6	4	6	6	6	6	6
PF00069_PF00780	Pkinase~CNH	8	8	8	8	8	6	8	8	8	8
PF00646_PF04300	F-box~FBA	1	2	2	3	3		2	2	2	2
PF00018_PF07653	SH3_1~SH3_2	2	1				2
PF13855_PF00001	LRR_8~7tm_1	2			1	2	1
PF12075_PF13637	KN_motif~Ank_4	1				1	2
PF13855_PF14914	LRR_8~LRRC37AB_C	1				2	1
PF14429_PF06920	DOCK-C2~DHR-2			2		1	1
PF13424_PF07719	TPR_12~TPR_2		1					1			2
PF14915_PF12001	CCDC144C~DUF3496					1		1			2
PF13306_PF00001	LRR_5~7tm_1	1						2			1
PF00307_PF12130	CH~DUF3585		2	2					1	1
PF13855_PF00612	LRR_8~IQ			1						1	2
PF00412_PF12130	LIM~DUF3585	2					1			1
PF00090_PF05986	TSP_1~ADAM_spacer1	2					1			2
PF16764_PF00641	Sharpin_PH~zf-RanBP		1	1						2
PF13445_PF00622	zf-RING_UBOX~SPRY	2	1								1
PF13041_PF13812	PPR_2~PPR_3	1					2				1
PF12796_PF00651	Ank_2~BTB	2	2	2	3	2	2	1	2	2	1
PF13409_PF13410	GST_N_2~GST_C_2	2	2	2	3	2	2	2	1	2	1
PF13855_PF00041	LRR_8~fn3	2	1	2	2	2	3	2	2	2	1
PF07686_PF15330	V-set~SIT	2	3	1	2	2	1	2	2	2	2
PF01909_PF03828	NTP_transf_2~PAP_assoc	1	3	1	2	2	2	2	2	2	2
PF03476_PF03473	MOSC_N~MOSC	1	2	3	2	2	3	2	2	2	2
PF07732_PF07731	Cu-oxidase_3~Cu-oxidase_2	2	2	1	2	2	3	2	2	2	3
PF01213_PF08603	CAP_N~CAP_C	2	2	2	1	1	2	2	2	3	2
PF02825_PF00097	WWE~zf-C3HC4	2	2	2	3	2	1	3	2	2	2
PF13716_PF00620	CRAL_TRIO_2~RhoGAP	1	1	2	2	2	2	3	2	2	2
PF03954_PF00059	Lectin_N~Lectin_C	4	3	2	3	3	2	3	3	3	3
PF01754_PF01428	zf-A20~zf-AN1	2	3	3	3	4	2	3	3	3	3
PF04589_PF02257	RFX1_trans_act~RFX_DNA_binding	2	2	4	3	3	3	3	3	3	3
PF13499_PF00153	EF-hand_7~Mito_carr	3	3	3	2	3	4	3	4	3	3
PF07992_PF02852	Pyr_redox_2~Pyr_redox_dim	4	3	4	4	4	5	3	4	4	4
PF08513_PF00400	LisH~WD40	2	3	3	3	3	3	4	3	2	3
PF00040_PF00059	fn2~Lectin_C	3	4	3	3	2	3	4	3	3	3
PF01336_PF00152	tRNA_anti-codon~tRNA-synt_2	4	4	3	5	5	4	4	4	4	4
PF00211_PF06327	Guanylate_cyc~DUF1053	4	4	3	3	4	5	4	4	4	4
PF00013_PF13920	KH_1~zf-C3HC4_3	3	4	4	4	5	3	4	4	4	4
PF00856_PF01753	SET~zf-MYND	3	3	4	4	5	4	4	4	4	4
PF00324_PF03522	AA_permease~SLC12	3	4	4	3	4	4	4	4	5	4
PF01398_PF13012	JAB~MitMem_reg	4	4	4	4	4	3	4	4	5	5
PF13589_PF07496	HATPase_c_3~zf-CW	4	4	4	3	4	3	4	5	4	4
PF01033_PF01663	Somatomedin_B~Phosphodiest		1			1	2		1	2
PF16070_PF15706	TMEM132~TMEM132D_C	2	2			1	1			1
PF00135_PF08674	COesterase~AChE_tetra	2	2	1	2	2	2	1	1	1	1
PF04969_PF05002	CS~SGS	2	1	2	2	2	1	1	1	1
PF01171_PF16503	ATP_bind_3~zn-ribbon_14		1		1	2		1	1	2	2
PF03765_PF00650	CRAL_TRIO_N~CRAL_TRIO	2		2	2	1	1	1	1		2
PF07679_PF02158	I-set~Neuregulin	1	1	2	2	2	1	1	2	2	1
PF10421_PF00240	OAS1_C~ubiquitin	1	2	1	1	2	1	1	2	2
PF00254_PF07719	FKBP_C~TPR_2	1	2	1	2	2	2	1		1	1
PF01553_PF00036	Acyltransferase~EF-hand_1	2	2	1	1	2		1			1
PF12075_PF13857	KN_motif~Ank_5	2	2	2	1	2	1	1
PF15692_PF06047	NKAP~SynMuv_product	2	2	2	2	1	1	2	1	1	1
PF00089_PF00431	Trypsin~CUB	2	2	1	1		1	2	1	2	2
PF16563_PF00320	P66_CC~GATA	1	2	2	1	1	1	2	1	2	2
PF09177_PF05739	Syntaxin-6_N~SNARE	1	2	1	2	2	2	2	1		1
PF00787_PF00018	PX~SH3_1	1		2	1		1	2	2	2	1
PF02906_PF02256	Fe_hyd_lg_C~Fe_hyd_SSU		2	1	1	1	1	2	2	2	2
PF06602_PF12578	Myotub-related~3-PAP	3	3	3	2	3	2	2	2	2	3
PF08557_PF00487	Lipid_DES~FA_desaturase		2		2	2	2	2	3	1	2
PF08059_PF00789	SEP~UBX	2	3	2	3	2	2	2	3	3	3
PF16674_PF00443	UCH_N~UCH	3	2	2	2	2	3	3	3	3	2
PF01085_PF01079	HH_signal~Hint	2	2	3	3	2	2	3	3	3	2
PF00481_PF07830	PP2C~PP2C_C	2	3	2	2	2	2	3	3	3	3
PF12045_PF00046	DUF3528~Homeobox	2	2	2	3	2	2	3	3	3	3
PF00525_PF00011	Crystallin~HSP20	3	4	3	4	4	3	4	4	3	3
PF02463_PF06470	SMC_N~SMC_hinge	5	5	5	4	5	4	4	5	4	4
PF00615_PF00069	RGS~Pkinase	5	4	5	4	4	4	5	4	5	5
PF00151_PF01477	Lipase~PLAT	7	6	6	7	7	7	7	6	6	6
PF15913_PF00090	Furin-like_2~TSP_1	2	2	2		2	1		1	1
PF00651_PF12874	BTB~zf-met	1	1	2	2		2	1	1	1
PF00035_PF16482	dsrm~Staufen_C	2	2	1	2	1	2	1	1	2	2
PF13923_PF02176	zf-C3HC4_2~zf-TRAF	1	2	1	2	1	1	1	2	2	1
PF00753_PF16123	Lactamase_B~HAGH_C	2	1	1	1	1	1	1	2	2	2
PF10427_PF16608	Ago_hook~TNRC6-PABC_bdg	1	1	2	1	1	2	1	2
PF02812_PF00208	ELFV_dehydrog_N~ELFV_dehydrog	1	1	2	1	2	2	2	1	1	1
PF00169_PF00018	PH~SH3_1	2	2	2	2	1	1	2	1	1	2
PF00999_PF00027	Na_H_Exchanger~cNMP_binding	2	2	2	2	1	1	2	1	1	2
PF01661_PF00644	Macro~PARP	1	2		1	2	1	2	1	1
PF00168_PF08372	C2~PRT_C	1	1	2	2	2	2	2	1	2	1
PF08174_PF00169	Anillin~PH	2	1	2	2	1	1	2	1	2	2
PF14658_PF14662	EF-hand_9~KASH_CCD	2	1	1	1	1	1	2	1	2	2
PF00651_PF01344	BTB~Kelch_1	2		2	1	2	2	2	1		1
PF11628_PF02189	TCR_zetazeta~ITAM	2	1	1	1	2	2	2	2	1	2
PF13543_PF07714	KSR1-SAM~Pkinase_Tyr	1	2	1	1	2	2	2	2	1	2
PF10421_PF01909	OAS1_C~NTP_transf_2	2	2	1	1	2	1	2	2	2	1
PF03061_PF01852	4HBT~START	1	1	1	2	2	2	2	2	2	1
PF06155_PF02668	DUF971~TauD	2	2	1	1	1	1	2	2	2	2
PF00024_PF00089	PAN_1~Trypsin	2	1	1	2	1	1	2	2	2	2
PF08156_PF01798	NOP5NT~Nop	2	1	1	1	1	2	2	2	2	2
PF16414_PF12349	NPC1_N~Sterol-sensing	1	2	1	1	1	2	2	2	2	2
PF13916_PF13914	Phostensin_N~Phostensin	1	1	1	2	2	1	2	2	2	2
PF00498_PF00250	FHA~Forkhead		1	1	2	1		2	2	2	2
PF00568_PF05210	WH1~Sprouty	2	2	3	3	2	3	2	2	2	3
PF13831_PF13832	PHD_2~zf-HC5HC2H_2	2	2	3	2	3	3	2	2	2	3
PF08336_PF13640	P4Ha_N~2OG-FeII_Oxy_3	2	2	3	3	3	3	2	2	3	3
PF12937_PF00400	F-box-like~WD40	3	3	3	2	2	2	2	3	3	3
PF16322_PF01167	Tub_N~Tub	2	3	3	3	2	2	2	3	3	3
PF14051_PF00628	Requiem_N~PHD	2	2	3	3	3	2	2	3	3	3
PF02893_PF16016	GRAM~DUF4782	3	2	2	2	2	2	3	3	3	2
PF04731_PF00046	Caudal_act~Homeobox	3	3	2	2	2	2	3	3	3	3
PF12203_PF00850	HDAC4_Gln~Hist_deacetyl	2	3	2	3	2	2	3	3	3	3
PF01403_PF00047	Sema~ig	3	4	3	4	3	3	3	3	4	4
PF03792_PF00046	PBC~Homeobox	3	3	4	4	3	4	3	4	3	3
PF04617_PF00046	Hox9_act~Homeobox	4	3	4	3	4	3	4	3	4	4
PF00389_PF02826	2-Hacid_dh~2-Hacid_dh_C	5	4	5	5	4	5	4	4	5	5
PF00005_PF12698	ABC_tran~ABC2_membrane_3	4	4	4	5	5	5	4	5	5	5
PF02318_PF00168	FYVE_2~C2	4	5	5	5	4	4	5	5	4	5
PF02198_PF00178	SAM_PNT~Ets	10	10	10	9	10	9	10	9	10	9
PF00176_PF00271	SNF2_N~Helicase_C	9	9	9	10	9	9	10	10	9	10
PF08824_PF12026	Serine_rich~DUF3513		2	1	1		1
PF00047_PF13927	ig~Ig_3	1	2	2	2	1		1	1	1	1
PF14604_PF00018	SH3_9~SH3_1	2	1	1		1	2	1	1	1	2
PF17144_PF14204	Ribosomal_L5e~Ribosomal_L18_c	1	1	1		2	2	1	1	1	2
PF01094_PF00003	ANF_receptor~7tm_3	2	2		1	1	1	1	2	1	1
PF12053_PF00595	DUF3534~PDZ	2		2	2	2	1	1	2	1	2
PF13857_PF12796	Ank_5~Ank_2	1	1		1	1	2	1	2	1	2
PF01403_PF00090	Sema~TSP_1	2	2		1	2	2	1	2	2	1
PF14604_PF00300	SH3_9~His_Phos_1	2	2	1		1	1	2	1	1	1
PF00059_PF00084	Lectin_C~Sushi	2		2	1	2	1	2	1	2	2
PF00076_PF15519	RRM_1~RBM39linker	1	1	2	2	2		2	1	2	2
PF12895_PF13424	ANAPC3~TPR_12	1		1	1	1	1	2	1	2	2
PF00515_PF13877	TPR_1~RPAP3_C	2	1	2	1	1		2	2	2	2
PF00520_PF03493	Ion_trans~BK_channel_a	2	1	2	1	1		2	2	2	2
PF01412_PF00169	ArfGap~PH	2	1		2	1	1	2	2	2	2
PF08143_PF00076	CBFNT~RRM_1	1	2	2	1	1		2	2	2	2
PF08614_PF00400	ATG16~WD40	1	2	2	2	2	1	2	2		1
PF13426_PF00233	PAS_9~PDEase_I	2	1	1	1	2	2		1	1	1
PF00168_PF10540	C2~Membr_traf_MHD	2							1	1	1
PF00097_PF00643	zf-C3HC4~zf-B_box	1	1						2		1
PF08801_PF03177	Nucleoporin_N~Nucleoporin_C				1		2			1	1
PF00047_PF01582	ig~TIR			1	1	2	1	1	2	1
PF00063_PF01843	Myosin_head~DIL	1	2		2	1	1		1		1
PF13894_PF00096	zf-C2H2_4~zf-C2H2	1		1	2	1			2	1	1
PF07546_PF07645	EMI~EGF_CA	1		1	1	2			2	1	1
PF16182_PF02209	AbLIM_anchor~VHP	2	2	1	1	1	2	1	1	1	1
PF00004_PF01434	AAA~Peptidase_M41	1	2	2	1	1	2	1	1	1	1
PF05773_PF01485	RWD~IBR	1	2	1	2	1	2	1	1	1	1
PF00076_PF12196	RRM_1~hNIFK_binding	1	2	1	1	2	2	1	1	1	1
PF02268_PF02751	TFIIA_gamma_N~TFIIA_gamma_C	1	1	1	2	2	2	1	1	1	1
PF00090_PF03782	TSP_1~AMOP	2	2	2	2	2	2	1	1	2	1
PF00069_PF15282	Pkinase~BMP2K_C	2	1	1	1	1	1	1	1	2	2
PF14604_PF00620	SH3_9~RhoGAP	1	2	2	2	2	2	1	1	2	2
PF02759_PF14604	RUN~SH3_9	2	1	1	2	1	1	1	2	1	1
PF13909_PF13912	zf-H2C2_5~zf-C2H2_6	1	2	2	1	1	1	1	2	1	1
PF00620_PF01852	RhoGAP~START	1	2	1	1	1	1	1	2	1	2
PF00008_PF02210	EGF~Laminin_G_2	2	2	2	2	1	2	1	2	2	1
PF00225_PF00498	Kinesin~FHA	1	1	1	2	1	1	1	2	2	1
PF16680_PF02189	Ig_4~ITAM	2	2	2	1	1	2	1	2	2	2
PF00069_PF11629	Pkinase~Mst1_SARAH	2	1	1	2	2	2	1	2	2	2
PF09229_PF08327	Aha1_N~AHSA1	1	1	1	1	1	1	1	2	2	2
PF12595_PF01694	Rhomboid_SP~Rhomboid	2	2	2	2	2	1	2	1	1	2
PF03020_PF09402	LEM~MSC	2	2	2	2	1	1	2	1	2	2
PF07691_PF05679	PA14~CHGN	1	2	2	2	2	1	2	1	2	2
PF00628_PF01853	PHD~MOZ_SAS	1	1	1	1	1	1	2	1	2	2
PF00595_PF09007	PDZ~EBP50_C	2	2	2	2	1	1	2	2	1	2
PF13923_PF02190	zf-C3HC4_2~LON_substr_bdg	2	2	2	1	1	2	2	2	1	2
PF13499_PF00071	EF-hand_7~Ras	1	2	2	2	2	1	2	2	1	2
PF05004_PF04836	IFRD~IFRD_C	1	2	1	2	2	2	2	2	1	2
PF00611_PF10291	FCH~muHD	2	2	2	2	1	1	2	2	2	1
PF16174_PF04774	IHABP4_N~HABP4_PAI-RBP1	2	2	2	2	1	1	2	2	2	1
PF14555_PF03556	UBA_4~Cullin_binding	1	2	2	1	2	2	2	2	2	1
PF00169_PF00566	PH~RabGAP-TBC	2	1	1	2	2	1	2	2	2	2
PF15037_PF08357	IL17_R_N~SEFIR	1	2	2	1	2	1	2	2	2	2
PF07885_PF03493	Ion_trans_2~BK_channel_a	1	2	1	2	2	1	2	2	2	2
PF03810_PF08506	IBN_N~Cse1	1	1	2	1	2	2	2	2	2	2
PF09744_PF11461	Jnk-SapK_ap_N~RILP	1	1	1	2	2	2	2	2	2	2
PF00617_PF00130	RasGEF~C1_1	2	2	2	2	2	3	2	2	3	3
PF17291_PF13402	Peptidase_M60	2	2	2	2	3	2	2	3	3	2
PF01122_PF14478	Cobalamin_bind~DUF4430	2	2	2	3	3	2	3	2	2	2
PF07679_PF07714	I-set~Pkinase_Tyr	3	3	2	3	3	2	3	2	3	3
PF00628_PF14061	PHD~Mtf2_C	2	3	3	2	3	3	3	2	3	3
PF12796_PF15898	Ank_2~PRKG1_interact	3	2	3	3	2	3	3	3	2	3
PF08766_PF00782	DEK_C~DSPc	3	2	2	3	3	3	3	3	2	3
PF16484_PF00755	CPT_N~Carn_acyltransf	2	3	2	3	3	3	3	3	2	3
PF00505_PF12067	HMG_box~Sox17_18_mid	2	2	3	3	3	3	3	3	2	3
PF12308_PF02191	Noelin-1~OLF	2	3	3	3	3	2	3	3	3	2
PF09289_PF07648	FOLN~Kazal_2	3	3	3	2	2	2	3	3	3	3
PF07177_PF13920	Neuralized~zf-C3HC4_3	2	3	3	3	2	2	3	3	3	3
PF00292_PF12403	PAX~Pax2_C	2	3	3	2	3	2	3	3	3	3
PF08447_PF12114	PAS_3~Period_C	2	3	3	2	3	2	3	3	3	3
PF00619_PF05729	CARD~NACHT	2	3	2	3	2	3	3	3	3	3
PF03957_PF00170	Jun~bZIP_1	2	2	3	3	3	2	3	3	3	3
PF00385_PF01393	Chromo~Chromo_shadow	3	3	3	4	4	3	3	3	3	4
PF00035_PF02137	dsrm~A_deamin	4	4	3	4	3	4	3	4	4	4
PF13774_PF00957	Longin~Synaptobrevin	3	3	3	3	4	3	4	3	4	3
PF00169_PF00620	PH~RhoGAP	4	3	4	4	3	3	4	4	4	4
PF13344_PF13242	Hydrolase_6~Hydrolase_like	3	3	4	4	4	3	4	4	4	4
PF00133_PF08264	tRNA-synt_1~Anticodon_1	5	5	5	4	4	4	5	5	5	5
PF02376_PF00046	CUT~Homeobox	4	5	4	5	5	4	5	5	5	5
PF00219_PF00086	IGFBP~Thyroglobulin_1	4	4	5	5	5	4	5	5	5	5
PF16178_PF04547	Anoct_dimer~Anoctamin	6	7	7	7	7	7	7	7	6	6
PF00605_PF10401	IRF~IRF-3	7	8	8	8	8	8	7	7	8	8
PF03114_PF00018	BAR~SH3_1	2	2	2	3	2	2	1	2	2	2
PF08442_PF00549	ATP-grasp_2~Ligase_CoA	2	2	3	1	2	2	2	2	2	2
PF04408_PF07717	HA2~OB_NTP_bind	2	2	2	2	3	1	2	2	2	2
PF16184_PF03160	Cadherin_3~Calx-beta	2	2	2	2	3	1	2	2	2	2
PF01193_PF01000	RNA_pol_L~RNA_pol_A_bac	2	2	2	1	3	2	2	2	2	2
PF07546_PF00386	EMI~C1q	2	1	2	2	2	3	2	2	2	2
PF00595_PF00412	PDZ~LIM	1	2	2	2	2	3	2	2	2	2
PF01056_PF00010	Myc_N~HLH	2	2	2	2	2	1	2	3	2	2
PF12932_PF12931	Sec16~Sec16_C	2	2	2	2	1	2	3	2	2	2
PF02319_PF08781	E2F_TDP~DP	2	1	2	2	2	2	3	2	2	2
PF04818_PF16566	CTD_bind~CREPT	3	3	4	3	3	2	3	3	3	3
PF02037_PF00076	SAP~RRM_1	3	3	3	3	4	2	3	3	3	3
PF00790_PF03127	VHS~GAT	3	3	3	2	3	3	3	3	3	4
PF02893_PF06602	GRAM~Myotub-related	3	2	3	3	3	3	3	3	4	3
PF00069_PF08332	Pkinase~CaMKII_AD	4	4	4	4	5	4	3	4	4	4
PF00349_PF03727	Hexokinase_1~Hexokinase_2	5	5	5	5	5	6	5	5	4	5
PF00005_PF01061	ABC_tran~ABC2_membrane	5	5	5	5	4	5	5	6	5	5
PF06297_PF00412	PET~LIM	5	5	5	5	4	5	5	6	5	5
PF00786_PF00069	PBD~Pkinase	6	6	6	6	6	5	7	6	6	6
PF05649_PF01431	Peptidase_M13_N~Peptidase_M13	6	6	6	6	6	5	7	6	6	6
PF02244_PF00246	Propep_M14~Peptidase_M14	8	9	8	8	8	8	8	8	8	7
PF00412_PF00046	LIM~Homeobox	12	12	11	12	13	12	12	12	12	12
PF00784_PF00373	MyTH4~FERM_M	1		1	2	2		1	1	1	1
PF16864_PF00891	Dimerisation2~Methyltransf_2	1	2	1	1	1		1	1	2
PF00629_PF00057	MAM~Ldl_recept_a		1	2	2		2	1	2	2	2
PF14604_PF07714	SH3_9~Pkinase_Tyr		2	3	3	3		3	3	2	3
PF01023_PF03516	S_100~Filaggrin	2			1	1		1	1
PF13553_PF00619	FIIND~CARD	1	2	1			1	1
PF16297_PF08284	DUF4939~RVP_2		1		1	2	1	1
PF00782_PF10409	DSPc~PTEN_C2				1		1	2	1		1
PF00791_PF07653	ZU5~SH3_2		1	1		2			1	1
PF13848_PF00085	Thioredoxin_6~Thioredoxin	1	2	1		1			1
PF02985_PF13646	HEAT~HEAT_2			1		1	1			1	2
PF00057_PF00089	Ldl_recept_a~Trypsin	1	1			1	1				2
PF00106_PF02036	adh_short~SCP2	2	2	1	1	1		1	1	1	1
PF09029_PF00155	Preseq_ALAS~Aminotran_1_2	1	1	2		1	1	1	1	1	2
PF00057_PF00431	Ldl_recept_a~CUB	2	1	1	1	1	2	1	1	1
PF00149_PF02872	Metallophos~5_nucleotid_C		2	1	1	1	1	1	2	1	1
PF13202_PF13499	EF-hand_5~EF-hand_7		1	2	1	1	1	1	2	1	1
PF13445_PF05605	zf-RING_UBOX~zf-Di19		1	1	1	1	1	1	2	1	2
PF13866_PF13867	zf-SAP30~SAP30_Sin3_bdg	1	2	2	2	2		2	2	1	2
PF06464_PF00501	DMAP_binding~AMP-binding	2	2	3	3	3		3	3	3	3
PF00397_PF01846	WW~FF	3	3	4	3	4	3	3	3	3	3
PF00017_PF08416	SH2~PTB	2	2	1	1	1	1	1	1	1	1
PF00041_PF07679	fn3~I-set	2	2	1	1	1	1	1	1	1	1
PF00053_PF00052	Laminin_EGF~Laminin_B	2	1	1	1	1	2	1	1	1	1
PF00028_PF02210	Cadherin~Laminin_G_2	2	1	1	1	2	1	1	1	1	1
PF01344_PF13415	Kelch_1~Kelch_3	1	2	1	2	1	1	1	1	1	1
PF13912_PF01448	zf-C2H2_6~ELM2	1	1	1	2	2	1	1	1	1	1
PF00536_PF14360	SAM_1~PAP2_C	1	1	2	1	1	1	1	1	1	2
PF03221_PF03184	HTH_Tnp_Tc5~DDE_1	1	1	2	1	1	1	1	1	1	2
PF03066_PF16276	Nucleoplasmin~NPM1-C	1	1	1	2	1	1	1	1	1	2
PF13439_PF00534	Glyco_transf_4~Glycos_transf_1	1	1	1	1	1	1	1	1	2	2
PF02854_PF02847	MIF4G~MA3	2	1	1	1	1	1	1	2	1	1
PF00010_PF08447	HLH~PAS_3	1	1	2	1	1	1	1	2	1	1
PF14844_PF02138	PH_BEACH~Beach	1	1	1	1	1	1	1	2	1	2
PF00788_PF00620	RA~RhoGAP	1	1	1	1	1	1	1	2	2	1
PF00855_PF11467	PWWP~LEDGF	2	2	2	2	2	1	1	2	2	2
PF04692_PF00341	PDGF_N~PDGF	1	2	2	2	2	2	1	2	2	2
PF02204_PF00788	VPS9~RA	1	1	1	2	1	1	2	1	1	1
PF08953_PF16300	DUF1899~WD40_4	1	1	1	1	1	2	2	1	1	1
PF00291_PF00571	PALP~CBS	1	1	1	1	1	1	2	1	2	1
PF12874_PF12171	zf-met~zf-C2H2_jaz	2	2	2	2	1	2	2	1	2	2
PF06456_PF04629	Arfaptin~ICA69	2	2	1	2	2	2	2	1	2	2
PF07496_PF00855	zf-CW~PWWP	2	2	1	2	2	2	2	1	2	2
PF01033_PF00045	Somatomedin_B~Hemopexin	2	1	2	2	2	2	2	1	2	2
PF02008_PF12851	zf-CXXC~Tet_JBP	2	1	2	2	2	2	2	1	2	2
PF00004_PF09336	AAA~Vps4_C	1	1	1	1	1	1	2	2	1	1
PF00817_PF11799	IMS~IMS_C	1	1	1	1	1	1	2	2	1	1
PF10522_PF05716	RII_binding_1~AKAP_110	2	2	2	2	2	1	2	2	1	2
PF14555_PF00789	UBA_4~UBX	2	2	2	1	2	2	2	2	1	2
PF11616_PF00856	EZH2_WD-Binding~SET	2	2	1	2	2	2	2	2	1	2
PF00240_PF09668	ubiquitin~Asp_protease	2	2	2	2	2	1	2	2	2	1
PF00630_PF05686	Filamin~Glyco_transf_90	2	2	2	2	2	1	2	2	2	1
PF06328_PF00041	Lep_receptor_Ig~fn3	2	2	2	1	2	2	2	2	2	1
PF12473_PF00566	DUF3694~RabGAP-TBC	1	2	2	2	2	2	2	2	2	1
PF01210_PF07479	NAD_Gly3P_dh_N~NAD_Gly3P_dh_C	3	3	2	2	2	2	2	2	2	2
PF00439_PF17035	Bromodomain~BET	3	2	2	2	2	3	2	2	2	2
PF02225_PF04258	PA~Peptidase_A22B	2	3	2	2	2	3	2	2	2	2
PF00008_PF00754	EGF~F5_F8_type_C	2	2	2	1	1	2	2	2	2	2
PF08142_PF04950	AARP2CN~RIBIOP_C	2	2	2	1	1	2	2	2	2	2
PF01501_PF13896	Glyco_transf_8~Glyco_transf_49	2	2	1	2	2	1	2	2	2	2
PF12872_PF00567	OST-HTH~TUDOR	2	2	1	2	2	1	2	2	2	2
PF07645_PF00629	EGF_CA~MAM	2	2	1	1	2	2	2	2	2	2
PF10602_PF01399	RPN7~PCI	2	1	2	2	2	1	2	2	2	2
PF12874_PF07528	zf-met~DZF	2	1	1	2	2	2	2	2	2	2
PF01391_PF00530	Collagen~SRCR	1	2	2	2	1	2	2	2	2	2
PF00085_PF04777	Thioredoxin~Evr1_Alr	1	2	2	2	2	1	2	2	2	2
PF00641_PF17219	zf-RanBP~YAF2_RYBP	1	2	2	2	2	1	2	2	2	2
PF02485_PF12529	Branch~Xylo_C	1	2	2	2	2	1	2	2	2	2
PF13757_PF13768	VIT_2~VWA_3	1	2	2	2	2	1	2	2	2	2
PF15920_PF15871	WHAMM-JMY_N~JMY	1	2	2	2	2	1	2	2	2	2
PF04488_PF04572	Gly_transf_sug~Gb3_synth	1	2	2	1	2	2	2	2	2	2
PF10559_PF00344	Plug_translocon~SecY	1	2	1	2	2	2	2	2	2	2
PF00134_PF16899	Cyclin_N~Cyclin_C_2	1	1	2	2	2	2	2	2	2	2
PF13878_PF13880	zf-C2H2_3~Acetyltransf_13	3	2	2	2	2	2	2	2	2	3
PF05196_PF01091	PTN_MK_N~PTN_MK_C	2	2	2	2	3	2	2	2	2	3
PF00017_PF00102	SH2~Y_phosphatase	2	2	2	2	2	2	2	2	3	3
PF02825_PF00644	WWE~PARP	3	3	3	3	2	3	2	3	3	3
PF00568_PF08776	WH1~VASP_tetra	3	3	2	3	3	3	2	3	3	3
PF02338_PF01754	OTU~zf-A20	2	3	3	3	3	3	2	3	3	3
PF06467_PF12012	zf-FCS~DUF3504	3	3	3	3	2	3	3	3	3	2
PF06484_PF15636	Ten_N~Tox-GHH	3	3	2	3	3	3	3	3	3	2
PF14875_PF12260	PIP49_N~PIP49_C	2	3	3	3	3	3	3	3	3	2
PF00970_PF00175	FAD_binding_6~NAD_binding_1	3	3	3	2	2	3	3	3	3	3
PF00856_PF09273	SET~Rubis-subs-bind	3	2	3	3	3	2	3	3	3	3
PF00400_PF00439	WD40~Bromodomain	2	3	3	3	3	2	3	3	3	3
PF06535_PF06534	RGM_N~RGM_C	2	3	3	3	3	2	3	3	3	3
PF12413_PF00046	DLL_N~Homeobox	2	3	3	3	3	2	3	3	3	3
PF13855_PF00595	LRR_8~PDZ	2	3	3	3	3	2	3	3	3	3
PF12310_PF00178	Elf-1_N~Ets	2	2	3	3	3	3	3	3	3	3
PF02828_PF00595	L27~PDZ	3	3	3	3	4	3	3	3	3	4
PF02251_PF02252	PA28_alpha~PA28_beta	3	3	3	3	4	3	3	4	3	3
PF01433_PF09127	Peptidase_M1~Leuk-A4-hydro_C	4	4	4	4	4	4	3	4	3	4
PF12062_PF00685	HSNSD~Sulfotransfer_1	4	4	4	4	4	3	4	4	4	3
PF00307_PF02187	CH~GAS2	4	3	3	4	4	4	4	4	4	4
PF00640_PF00017	PID~SH2	3	4	4	4	3	4	4	4	4	4
PF08416_PF00018	PTB~SH3_1	3	4	4	4	3	4	4	4	4	4
PF12052_PF00625	VGCC_beta4Aa_N~Guanylate_kin	3	4	4	4	4	3	4	4	4	4
PF12796_PF00536	Ank_2~SAM_1	3	4	4	3	4	4	4	4	4	4
PF01553_PF16076	Acyltransferase~Acyltransf_C	5	5	5	4	5	4	5	5	5	5
PF01448_PF00249	ELM2~Myb_DNA-binding	4	5	5	5	5	4	5	5	5	5
PF07565_PF00955	Band_3_cyto~HCO3_cotransp	9	9	8	9	9	8	9	9	9	9
PF00435_PF10541	Spectrin~KASH	1	1	2			1	1	1
PF10511_PF00095	Cementoin~WAP	1	1	1			1	1			2
PF02820_PF01530	MBT~zf-C2HC	1	1	1				2	1	1
PF00088_PF00100	Trefoil~Zona_pellucida	1	1	1				1	1	2	1
PF00010_PF11851	HLH~DUF3371			1	1	1	2	1	1		1
PF00307_PF00412	CH~LIM		1	1	1	1	2	1	1
PF11465_PF13895	Receptor_2B4~Ig_2	1	1	1	2			1		1	1
PF00005_PF00664	ABC_tran~ABC_membrane		1		1	1	1	1		1	2
PF02023_PF13843	SCAN~DDE_Tnp_1_7	1		1	2	1	1	1		1
PF00076_PF01480	RRM_1~PWI	1	1		1	2		1	1	1	1
PF12796_PF14604	Ank_2~SH3_9	1		1	1	2		1	1	1	1
PF01471_PF00413	PG_binding_1~Peptidase_M10		2	1	1	1		1	1	1	1
PF02037_PF00929	SAP~RNase_T			1	1	1	1	1	1	1	2
PF00288_PF08544	GHMP_kinases_N~GHMP_kinases_C	1	1	1	1	1	2	1			1
PF02225_PF04253	PA~TFR_dimer	1	1	1	1			2	1	1	1
PF14671_PF00782	DSPn~DSPc	1	1	1	1		1	2	1		1
PF13417_PF14497	GST_N_3~GST_C_3	2	2	2	2	1		2		2	2
PF08158_PF05285	NUC130_3NT~SDA1	2	1	1	1	1		1	1	1	1
PF07650_PF00189	KH_2~Ribosomal_S3_C	1	1	1	2		1	1	1	1	1
PF00206_PF10415	Lyase_1~FumaraseC_C	1	1	1	1		2	1	1	1	1
PF04000_PF09368	Sas10_Utp3~Sas10	1	1	1	1		2	1	1	1	1
PF07645_PF00683	EGF_CA~TB	1	1	1	1		2	1	1	1	1
PF00790_PF00018	VHS~SH3_1	1	1	1		1	2	1	1	1	1
PF02185_PF03097	HR1~BRO1	1	1		1	2	1	1	1	1	1
PF00169_PF00017	PH~SH2		2	1	1	1	1	1	1	1	1
PF03871_PF01191	RNA_pol_Rpb5_N~RNA_pol_Rpb5_C		1	1	2	1	1	1	1	1	1
PF12353_PF00076	eIF3g~RRM_1		1	1	1	1	1	1	1	1	2
PF00069_PF00063	Pkinase~Myosin_head	2	1	1	1	1	1	1	1	1
PF00076_PF00160	RRM_1~Pro_isomerase	1	1	1	1	1		1	1	2	1
PF02765_PF16686	POT1~POT1PC	1		1	1	1	1	1	2	1	1
PF08487_PF13768	VIT~VWA_3	1		1	1	1	1	1	2	1	1
PF00017_PF16454	SH2~PI3K_P85_iSH2	1	1	1	1		1	2	1	1	1
PF02170_PF02171	PAZ~Piwi	1		1	1	1	1	2	1	1	1
PF04707_PF00650	PRELI~CRAL_TRIO	2	2		2	2	1	2	2	2	2
PF04960_PF12796	Glutaminase~Ank_2	1	2	2	2	2		2	2	2	2
PF15803_PF15805	zf-SCNM1~SCNM1_acidic	1	1	1	1	1	1	2		1	1
PF12496_PF13716	BNIP2~CRAL_TRIO_2	3	3	3	3	3	4	3	3	3	3
PF16493_PF05920	Meis_PKNOX_N~Homeobox_KN	4	5	5	5	5	5	5	5	5	5
PF00063_PF01576	Myosin_head~Myosin_tail_1	2	1	1	1	1	1	1	1	1	1
PF03828_PF01909	PAP_assoc~NTP_transf_2	2	1	1	1	1	1	1	1	1	1
PF00109_PF02801	ketoacyl-synt~Ketoacyl-synt_C	1	2	1	1	1	1	1	1	1	1
PF00168_PF01735	C2~PLA2_B	1	2	1	1	1	1	1	1	1	1
PF01602_PF09066	Adaptin_N~B2-adapt-app_C	1	1	2	1	1	1	1	1	1	1
PF02789_PF00883	Peptidase_M17_N~Peptidase_M17	1	1	2	1	1	1	1	1	1	1
PF13365_PF13180	Trypsin_2~PDZ_2	1	1	2	1	1	1	1	1	1	1
PF13432_PF00515	TPR_16~TPR_1	1	1	2	1	1	1	1	1	1	1
PF00466_PF00428	Ribosomal_L10~Ribosomal_60s	1	1	1	2	1	1	1	1	1	1
PF00573_PF14374	Ribosomal_L4~Ribos_L4_asso_C	1	1	1	2	1	1	1	1	1	1
PF12895_PF00515	ANAPC3~TPR_1	1	1	1	2	1	1	1	1	1	1
PF00041_PF07714	fn3~Pkinase_Tyr	1	1	1	1	1	2	1	1	1	1
PF00219_PF00093	IGFBP~VWC	1	1	1	1	1	2	1	1	1	1
PF00856_PF00096	SET~zf-C2H2	1	1	1	1	1	2	1	1	1	1
PF01344_PF13964	Kelch_1~Kelch_6	1	1	1	1	1	2	1	1	1	1
PF03446_PF14833	NAD_binding_2~NAD_binding_11	1	1	1	1	1	2	1	1	1	1
PF04757_PF00097	Pex2_Pex12~zf-C3HC4	1	1	1	1	1	2	1	1	1	1
PF11566_PF08577	PI31_Prot_N~PI31_Prot_C	1	1	1	1	1	2	1	1	1	1
PF12796_PF01753	Ank_2~zf-MYND	1	1	1	1	1	2	1	1	1	1
PF16880_PF00350	EHD_N~Dynamin_N	1	1	1	1	1	2	1	1	1	1
PF00122_PF00702	E1-E2_ATPase~Hydrolase	1	1	1	1	2	1	1	1	1	1
PF00226_PF05207	DnaJ~zf-CSL	1	1	1	1	2	1	1	1	1	1
PF00630_PF00632	Filamin~HECT	1	1	1	1	2	1	1	1	1	1
PF03931_PF01466	Skp1_POZ~Skp1	1	1	1	1	2	1	1	1	1	1
PF08799_PF02840	PRP4~Prp18	1	1	1	1	2	1	1	1	1	1
PF12171_PF12874	zf-C2H2_jaz~zf-met	1	1	1	1	2	1	1	1	1	1
PF12937_PF01369	F-box-like~Sec7	1	1	1	1	2	1	1	1	1	1
PF14852_PF14853	Fis1_TPR_N~Fis1_TPR_C	1	1	1	1	2	1	1	1	1	1
PF15926_PF13923	RNF220~zf-C3HC4_2	1	1	1	1	2	1	1	1	1	1
PF00400_PF04192	WD40~Utp21	1	1	1	1	1	1	1	1	1	2
PF06858_PF08155	NOG1~NOGCT	1	1	1	1	1	1	1	1	1	2
PF07912_PF07749	ERp29_N~ERp29	1	1	1	1	1	1	1	1	1	2
PF11803_PF16363	UXS1_N~GDP_Man_Dehyd	1	1	1	1	1	1	1	1	1	2
PF13393_PF03129	tRNA-synt_His~HGTP_anticodon	1	1	1	1	1	1	1	1	1	2
PF02225_PF04389	PA~Peptidase_M28	1	1	1	1	1	1	1	1	2	1
PF00397_PF00639	WW~Rotamase	1	1	1	1	1	1	1	2	1	1
PF00467_PF01777	KOW~Ribosomal_L27e	1	1	1	1	1	1	1	2	1	1
PF00479_PF02781	G6PD_N~G6PD_C	1	1	1	1	1	1	1	2	1	1
PF02403_PF00587	Seryl_tRNA_N~tRNA-synt_2b	1	1	1	1	1	1	1	2	1	1
PF11466_PF00377	Doppel~Prion	1	1	1	1	1	1	1	2	1	1
PF00046_PF11569	Homeobox~Homez	2	2	2	2	2	2	1	2	2	2
PF00051_PF00089	Kringle~Trypsin	1	1	1	1	1	1	2	1	1	1
PF02218_PF00018	HS1_rep~SH3_1	1	1	1	1	1	1	2	1	1	1
PF05470_PF01399	eIF-3c_N~PCI	1	1	1	1	1	1	2	1	1	1
PF12037_PF00004	DUF3523~AAA	1	1	1	1	1	1	2	1	1	1
PF12537_PF12430	GPHR_N~ABA_GPCR	1	1	1	1	1	1	2	1	1	1
PF00069_PF12179	Pkinase~IKKbetaNEMObind	2	2	2	2	2	2	2	1	2	2
PF04644_PF04643	Motilin_ghrelin~Motilin_assoc	2	2	2	2	2	2	2	1	2	2
PF12796_PF01302	Ank_2~CAP_GLY	2	2	2	2	2	2	2	1	2	2
PF00069_PF12063	Pkinase~DUF3543	2	2	2	2	2	2	2	2	1	2
PF11365_PF14818	SOGA~DUF4482	2	2	2	2	2	2	2	2	1	2
PF00001_PF08983	7tm_1~DUF1856	2	2	2	2	2	2	2	2	2	1
PF00004_PF00439	AAA~Bromodomain	2	2	2	2	2	2	2	2	2	1
PF00013_PF00567	KH_1~TUDOR	2	2	2	2	2	2	2	2	2	1
PF00520_PF16519	Ion_trans~TRPM_tetra	2	2	2	2	2	2	2	2	2	1
PF00614_PF13918	PLDc~PLDc_3	2	2	2	2	2	2	2	2	2	1
PF01145_PF15975	Band_7~Flot	2	2	2	2	2	2	2	2	2	1
PF02737_PF00725	3HCDH_N~3HCDH	2	3	2	2	2	2	2	2	2	2
PF14161_PF14160	FAM110_N~FAM110_C	2	3	2	2	2	2	2	2	2	2
PF00586_PF02769	AIRS~AIRS_C	2	2	3	2	2	2	2	2	2	2
PF02136_PF00076	NTF2~RRM_1	2	2	2	3	2	2	2	2	2	2
PF07528_PF00035	DZF~dsrm	2	2	2	3	2	2	2	2	2	2
PF00224_PF02887	PK~PK_C	2	2	2	2	1	2	2	2	2	2
PF00478_PF00571	IMPDH~CBS	2	2	2	2	1	2	2	2	2	2
PF01233_PF02799	NMT~NMT_C	2	2	2	2	1	2	2	2	2	2
PF01388_PF12031	ARID~BAF250_C	2	2	2	2	1	2	2	2	2	2
PF07531_PF05236	TAFH~TAF4	2	2	2	2	1	2	2	2	2	2
PF12796_PF00018	Ank_2~SH3_1	2	2	2	2	1	2	2	2	2	2
PF15784_PF00249	GPS2_interact~Myb_DNA-binding	2	2	2	2	1	2	2	2	2	2
PF00880_PF14604	Nebulin~SH3_9	2	2	2	2	2	3	2	2	2	2
PF13872_PF13871	AAA_34~Helicase_C_4	2	2	2	2	2	3	2	2	2	2
PF15917_PF12166	PIEZO~Piezo_RRas_bdg	2	2	2	2	2	3	2	2	2	2
PF00069_PF12605	Pkinase~CK1gamma_C	2	2	2	2	2	1	2	2	2	2
PF00071_PF00651	Ras~BTB	2	2	2	2	2	1	2	2	2	2
PF00169_PF01363	PH~FYVE	2	2	2	2	2	1	2	2	2	2
PF01120_PF16757	Alpha_L_fucos~Fucosidase_C	2	2	2	2	2	1	2	2	2	2
PF04553_PF00642	Tis11B_N~zf-CCCH	2	2	2	2	2	1	2	2	2	2
PF04677_PF04676	CwfJ_C_1~CwfJ_C_2	2	2	2	2	2	1	2	2	2	2
PF08515_PF07714	TGF_beta_GS~Pkinase_Tyr	2	2	2	2	2	1	2	2	2	2
PF09744_PF16471	Jnk-SapK_ap_N~JIP_LZII	2	2	2	2	2	1	2	2	2	2
PF10408_PF04564	Ufd2P_core~U-box	2	2	2	2	2	1	2	2	2	2
PF10513_PF06752	EPL1~E_Pc_C	2	2	2	2	2	1	2	2	2	2
PF15412_PF08743	Nse4-Nse3_bdg~Nse4_C	2	2	2	2	2	1	2	2	2	2
PF15965_PF15966	zf-TRAF_2~F-box_4	2	2	2	2	2	1	2	2	2	2
PF00447_PF06546	HSF_DNA-bind~Vert_HS_TF	2	2	2	2	3	2	2	2	2	2
PF05008_PF12352	V-SNARE~V-SNARE_C	2	2	2	2	3	2	2	2	2	2
PF00027_PF01734	cNMP_binding~Patatin	2	2	2	1	2	2	2	2	2	2
PF02121_PF02862	IP_trans~DDHD	2	2	2	1	2	2	2	2	2	2
PF04928_PF01909	PAP_central~NTP_transf_2	2	2	2	1	2	2	2	2	2	2
PF07679_PF02816	I-set~Alpha_kinase	2	2	2	1	2	2	2	2	2	2
PF14222_PF14225	MOR2-PAG1_N~MOR2-PAG1_C	2	2	2	1	2	2	2	2	2	2
PF01476_PF07534	LysM~TLD	2	2	1	2	2	2	2	2	2	2
PF02759_PF00566	RUN~RabGAP-TBC	2	2	1	2	2	2	2	2	2	2
PF11577_PF16516	NEMO~CC2-LZ	2	2	1	2	2	2	2	2	2	2
PF00030_PF00652	Crystall~Ricin_B_lectin	2	1	2	2	2	2	2	2	2	2
PF00069_PF08912	Pkinase~Rho_Binding	2	1	2	2	2	2	2	2	2	2
PF00254_PF13499	FKBP_C~EF-hand_7	2	1	2	2	2	2	2	2	2	2
PF00622_PF13920	SPRY~zf-C3HC4_3	2	1	2	2	2	2	2	2	2	2
PF02759_PF13901	RUN~zf-RING_9	2	1	2	2	2	2	2	2	2	2
PF08154_PF00400	NLE~WD40	2	1	2	2	2	2	2	2	2	2
PF16499_PF17450	Melibiase_2~Melibiase_2_C	2	1	2	2	2	2	2	2	2	2
PF00097_PF02176	zf-C3HC4~zf-TRAF	1	2	2	2	2	2	2	2	2	2
PF00250_PF16676	Forkhead~FOXO-TAD	1	2	2	2	2	2	2	2	2	2
PF00397_PF00640	WW~PID	1	2	2	2	2	2	2	2	2	2
PF00498_PF15308	FHA~CEP170_C	1	2	2	2	2	2	2	2	2	2
PF00640_PF06311	PID~NumbF	1	2	2	2	2	2	2	2	2	2
PF00651_PF03131	BTB~bZIP_Maf	1	2	2	2	2	2	2	2	2	2
PF00763_PF02882	THF_DHG_CYH~THF_DHG_CYH_C	1	2	2	2	2	2	2	2	2	2
PF01154_PF08540	HMG_CoA_synt_N~HMG_CoA_synt_C	1	2	2	2	2	2	2	2	2	2
PF01602_PF02883	Adaptin_N~Alpha_adaptinC2	1	2	2	2	2	2	2	2	2	2
PF03815_PF00092	LCCL~VWA	1	2	2	2	2	2	2	2	2	2
PF03859_PF01833	CG-1~TIG	1	2	2	2	2	2	2	2	2	2
PF11618_PF00168	C2-C2_1~C2	1	2	2	2	2	2	2	2	2	2
PF11717_PF01853	Tudor-knot~MOZ_SAS	1	2	2	2	2	2	2	2	2	2
PF13519_PF15300	VWA_2~INT_SG_DDX_CT_C	1	2	2	2	2	2	2	2	2	2
PF13793_PF14572	Pribosyltran_N~Pribosyl_synth	1	2	2	2	2	2	2	2	2	2
PF04494_PF00400	TFIID_NTD2~WD40	2	2	2	2	2	2	2	2	2	3
PF14845_PF00728	Glycohydro_20b2~Glyco_hydro_20	2	2	2	2	2	2	2	2	2	3
PF00917_PF00651	MATH~BTB	2	2	2	2	2	2	2	3	2	2
PF08344_PF00520	TRP_2~Ion_trans	2	2	2	2	2	2	2	3	2	2
PF04825_PF04824	Rad21_Rec8_N~Rad21_Rec8	3	3	3	3	3	3	2	3	3	3
PF08466_PF01007	IRK_N~IRK	2	2	2	2	2	2	3	2	2	2
PF03807_PF01794	F420_oxidored~Ferric_reduct	3	3	3	3	2	3	3	3	3	3
PF00004_PF08542	AAA~Rep_fac_C	3	3	3	3	3	2	3	3	3	3
PF00046_PF13293	Homeobox~DUF4074	3	3	3	3	3	2	3	3	3	3
PF00390_PF03949	malic~Malic_M	3	3	3	3	3	2	3	3	3	3
PF00640_PF00595	PID~PDZ	3	3	3	3	3	2	3	3	3	3
PF02755_PF02037	RPEL~SAP	3	3	3	3	3	2	3	3	3	3
PF04621_PF00178	ETS_PEA3_N~Ets	3	3	3	3	3	2	3	3	3	3
PF08397_PF14604	IMD~SH3_9	3	3	3	3	3	2	3	3	3	3
PF13704_PF01755	Glyco_tranf_2_4~Glyco_transf_25	3	3	3	3	3	2	3	3	3	3
PF00005_PF12848	ABC_tran~ABC_tran_Xtn	3	3	3	3	4	3	3	3	3	3
PF00226_PF09320	DnaJ~DUF1977	3	3	3	3	4	3	3	3	3	3
PF12265_PF00400	CAF1C_H4-bd~WD40	3	3	3	3	4	3	3	3	3	3
PF13281_PF00069	DUF4071~Pkinase	3	3	3	2	3	3	3	3	3	3
PF00564_PF00595	PB1~PDZ	3	3	2	3	3	3	3	3	3	3
PF00038_PF00932	Filament~LTD	3	2	3	3	3	3	3	3	3	3
PF00786_PF14957	PBD~BORG_CEP	3	2	3	3	3	3	3	3	3	3
PF02145_PF11881	Rap_GAP~SPAR_C	3	2	3	3	3	3	3	3	3	3
PF02759_PF01363	RUN~FYVE	3	2	3	3	3	3	3	3	3	3
PF08758_PF00028	Cadherin_pro~Cadherin	3	2	3	3	3	3	3	3	3	3
PF13850_PF07970	ERGIC_N~COPIIcoated_ERV	3	2	3	3	3	3	3	3	3	3
PF00520_PF03520	Ion_trans~KCNQ_channel	2	3	3	3	3	3	3	3	3	3
PF00999_PF16644	Na_H_Exchanger~NEXCaM_BD	2	3	3	3	3	3	3	3	3	3
PF08232_PF00400	Striatin~WD40	2	3	3	3	3	3	3	3	3	3
PF08390_PF03798	TRAM1~TRAM_LAG1_CLN8	2	3	3	3	3	3	3	3	3	3
PF00076_PF07744	RRM_1~SPOC	3	3	3	3	3	3	3	3	3	4
PF00530_PF01186	SRCR~Lysyl_oxidase	3	3	3	3	3	3	3	4	3	3
PF01565_PF02913	FAD_binding_4~FAD-oxidase_C	3	3	3	3	3	3	3	4	3	3
PF07645_PF12662	EGF_CA~cEGF	4	4	4	4	4	4	3	4	4	4
PF01591_PF00300	6PF2K~His_Phos_1	4	4	4	4	3	4	4	4	4	4
PF00010_PF12533	HLH~Neuro_bHLH	4	4	4	4	4	3	4	4	4	4
PF00675_PF05193	Peptidase_M16~Peptidase_M16_C	4	4	4	4	4	3	4	4	4	4
PF07686_PF00193	V-set~Xlink	4	4	4	4	5	4	4	4	4	4
PF13855_PF00307	LRR_8~CH	4	4	3	4	4	4	4	4	4	4
PF01369_PF15410	Sec7~PH_9	4	3	4	4	4	4	4	4	4	4
PF02437_PF08782	Ski_Sno~c-SKI_SMAD_bind	3	4	4	4	4	4	4	4	4	4
PF03952_PF00113	Enolase_N~Enolase_C	4	4	4	4	4	4	4	5	4	4
PF00752_PF00867	XPG_N~XPG_I	4	4	4	4	4	4	5	4	4	4
PF01138_PF03725	RNase_PH~RNase_PH_C	5	5	5	5	5	4	5	5	5	5
PF02319_PF16421	E2F_TDP~E2F_CC-MB	6	6	6	6	6	5	6	6	6	6
PF00017_PF07525	SH2~SOCS_box	6	6	6	5	6	6	6	6	6	6
PF00888_PF10557	Cullin~Cullin_Nedd8	6	6	5	6	6	6	6	6	6	6
PF00930_PF00326	DPPIV_N~Peptidase_S9	5	6	6	6	6	6	6	6	6	6
PF04732_PF00038	Filament_head~Filament	7	7	7	7	7	6	7	7	7	7
PF00536_PF07647	SAM_1~SAM_2	7	7	6	7	7	7	7	7	7	7
PF13540_PF00415	RCC1_2~RCC1	1	1	1			1
PF00225_PF00787	Kinesin~PX	1	1		1	1	1
PF00642_PF13087	zf-CCCH~AAA_12	1	1		1		1
PF05572_PF00084	Peptidase_M43~Sushi	1	1		1		1
PF16028_PF11941	SLC3A2_N~DUF3459	1	1		1
PF02847_PF02020	MA3~W2	1	1			1
PF01663_PF04987	Phosphodiest~PigN	1	1				1
PF02879_PF02880	PGM_PMM_II~PGM_PMM_III	1	1				1
PF03184_PF09026	DDE_1~CENP-B_dimeris	1	1				1
PF07452_PF00093	CHRD~VWC	1	1				1
PF00130_PF10409	C1_1~PTEN_C2	1	1
PF00787_PF03114	PX~BAR	1	1
PF10469_PF04930	AKAP7_NLS~FUN14	1	1
PF02770_PF00441	Acyl-CoA_dh_M~Acyl-CoA_dh_1	1		1	1
PF10591_PF00153	SPARC_Ca_bdg~Mito_carr	1		1	1
PF13353_PF04055	Fer4_12~Radical_SAM	1		1		1	1
PF00018_PF00625	SH3_1~Guanylate_kin	1		1
PF01602_PF08752	Adaptin_N~COP-gamma_platf	1		1
PF05221_PF00670	AdoHcyase~AdoHcyase_NAD	1		1
PF13919_PF13922	ASXH~PHD_3	1		1
PF03357_PF02990	Snf7~EMP70	1			1	1	1
PF13246_PF16212	Cation_ATPase~PhoLip_ATPase_C	1			1	1
PF06831_PF06839	H2TH~zf-GRF	1			1		1
PF00240_PF12796	ubiquitin~Ank_2	1			1
PF00564_PF16158	PB1~N_BRCA1_IG	1			1
PF07679_PF00047	I-set~ig	1			1
PF16414_PF02460	NPC1_N~Patched	1			1
PF00622_PF13671	SPRY~AAA_33	1				1	1
PF00976_PF08035	ACTH_domain~Op_neuropeptide	1				1
PF00994_PF03453	MoCF_biosynth~MoeA_N	1				1
PF01454_PF12440	MAGE~MAGE_N	1				1
PF07646_PF13418	Kelch_2~Kelch_4	1				1
PF07679_PF00069	I-set~Pkinase	1				1
PF10607_PF13445	CLTH~zf-RING_UBOX	1				1
PF00093_PF02822	VWC~Antistasin	1					1
PF00382_PF07741	TFIIB~BRF1	1					1
PF00651_PF08005	BTB~PHR	1					1
PF00658_PF00632	PABP~HECT	1					1
PF00787_PF00788	PX~RA	1					1
PF01749_PF00514	IBB~Arm	1					1
PF01926_PF16897	MMR_HSR1~MMR_HSR1_Xtn	1					1
PF05279_PF05118	Asp-B-Hydro_N~Asp_Arg_Hydrox	1					1
PF14580_PF13855	LRR_9~LRR_8	1					1
PF16675_PF16676	FOXO_KIX_bdg~FOXO-TAD	1					1
PF00595_PF00615	PDZ~RGS		1	1	1		1
PF00498_PF00628	FHA~PHD		1	1	1
PF13895_PF00656	Ig_2~Peptidase_C14		1	1	1
PF02882_PF01268	THF_DHG_CYH_C~FTHFS		1	1		1	1
PF03127_PF02883	GAT~Alpha_adaptinC2		1	1		1	1
PF00400_PF12341	WD40~Mcl1_mid		1	1		1
PF16866_PF00646	PHD_4~F-box		1	1			1
PF00566_PF00018	RabGAP-TBC~SH3_1		1	1
PF01331_PF03919	mRNA_cap_enzyme~mRNA_cap_C		1	1
PF04212_PF00004	MIT~AAA		1	1
PF07534_PF01926	TLD~MMR_HSR1		1	1
PF07686_PF02189	V-set~ITAM		1		1		1
PF05773_PF06544	RWD~DUF1115		1		1
PF01344_PF13854	Kelch_1~Kelch_5		1			1	1
PF01352_PF00046	KRAB~Homeobox		1			1
PF14580_PF12799	LRR_9~LRR_4		1			1
PF15663_PF00642	zf-CCCH_3~zf-CCCH		1			1
PF16780_PF13410	AIMP2_LysRS_bd~GST_C_2		1			1
PF00013_PF16568	KH_1~Sam68-YY		1				1
PF05020_PF05021	zf-NPL4~NPL4		1				1
PF01023_PF13202	S_100~EF-hand_5			1	1	1
PF06741_PF07145	LsmAD~PAM2			1	1	1
PF13837_PF01256	Myb_DNA-bind_4~Carb_kinase			1	1	1
PF03020_PF01693	LEM~Cauli_VI			1	1		1
PF00008_PF00386	EGF~C1q			1	1
PF03489_PF02199	SapB_2~SapA			1	1
PF07496_PF01593	zf-CW~Amino_oxidase			1	1
PF13419_PF00561	HAD_2~Abhydrolase_1			1	1
PF13854_PF01344	Kelch_5~Kelch_1			1	1
PF16878_PF05920	SIX1_SD~Homeobox_KN			1	1
PF10469_PF10470	AKAP7_NLS~AKAP7_RIRII_bdg			1		1	1
PF16515_PF01608	HIP1_clath_bdg~I_LWEQ			1		1	1
PF00097_PF00533	zf-C3HC4~BRCT			1		1
PF00097_PF00628	zf-C3HC4~PHD			1		1
PF00219_PF07679	IGFBP~I-set			1		1
PF00643_PF13765	zf-B_box~PRY			1		1
PF00433_PF00069	Pkinase_C~Pkinase			1			1
PF00441_PF01756	Acyl-CoA_dh_1~ACOX			1			1
PF00514_PF16186	Arm~Arm_3			1			1
PF00551_PF00171	Formyl_trans_N~Aldedh			1			1
PF01575_PF02036	MaoC_dehydratas~SCP2			1			1
PF04675_PF01068	DNA_ligase_A_N~DNA_ligase_A_M			1			1
PF09296_PF09297	NUDIX-like~zf-NADH-PPase			1			1
PF12796_PF13428	Ank_2~TPR_14			1			1
PF14291_PF05699	DUF4371~Dimer_Tnp_hAT			1			1
PF15936_PF00412	DUF4749~LIM			1			1
PF01342_PF00628	SAND~PHD				1	1	1
PF01509_PF16198	TruB_N~TruB_C_2				1	1	1
PF00270_PF00476	DEAD~DNA_pol_A				1	1
PF00405_PF09439	Transferrin~SRPRB				1	1
PF01841_PF04721	Transglut_core~PAW				1	1
PF03607_PF01477	DCX~PLAT				1	1
PF07679_PF08686	I-set~PLAC				1		1
PF07686_PF13765	V-set~PRY				1		1
PF16297_PF13975	DUF4939~gag-asp_proteas				1		1
PF09379_PF00373	FERM_N~FERM_M					1	1
PF00168_PF00069	C2~Pkinase					2	2
PF00564_PF00018	PB1~SH3_1							1	1	1
PF07967_PF08600	zf-C3HC~Rsm1							1	1	1
PF15821_PF15852	DUF4709~DUF4724							1	1	1
PF00047_PF02189	ig~ITAM							1	1
PF13855_PF01825	LRR_8~GPS							1	1
PF17490_PF02994	Tnp_22_dsRBD~Transposase_22							1	1
PF03810_PF02985	IBN_N~HEAT							1		1	1
PF02093_PF00098	Gag_p30~zf-CCHC							1		1
PF02926_PF01170	THUMP~UPF0020							1		1
PF13855_PF00008	LRR_8~EGF							1		1
PF00076_PF12171	RRM_1~zf-C2H2_jaz							1			1
PF00130_PF00018	C1_1~SH3_1							1			1
PF00612_PF00004	IQ~AAA							1			1
PF02204_PF12796	VPS9~Ank_2							1			1
PF13669_PF00903	Glyoxalase_4~Glyoxalase							1			1
PF09514_PF00096	SSXRD~zf-C2H2								1	1	1
PF00009_PF03144	GTP_EFTU~GTP_EFTU_D2								1	1
PF15548_PF00735	DUF4655~Septin								1	1
PF00615_PF02196	RGS~RBD								1		1
PF10583_PF06994	Involucrin_N~Involucrin2								1		1
PF00076_PF00567	RRM_1~TUDOR									1	1
PF00130_PF00780	C1_1~CNH									1	1
PF02225_PF17123	PA~zf-RING_11									1	1
PF02758_PF00656	PYRIN~Peptidase_C14									1	1
PF03732_PF08284	Retrotrans_gag~RVP_2									1	1
PF07145_PF00443	PAM2~UCH									1	1
PF13553_PF00531	FIIND~Death									1	1
PF14598_PF11413	PAS_11~HIF-1									1	1
PF00001_PF03827	7tm_1~Orexin_rec2	1	1	1	1	1	1	1	1	1	1
PF00009_PF11987	GTP_EFTU~IF-2	1	1	1	1	1	1	1	1	1	1
PF00013_PF00536	KH_1~SAM_1	1	1	1	1	1	1	1	1	1	1
PF00013_PF09005	KH_1~DUF1897	1	1	1	1	1	1	1	1	1	1
PF00013_PF10469	KH_1~AKAP7_NLS	1	1	1	1	1	1	1	1	1	1
PF00018_PF09431	SH3_1~DUF2013	1	1	1	1	1	1	1	1	1	1
PF00028_PF07714	Cadherin~Pkinase_Tyr	1	1	1	1	1	1	1	1	1	1
PF00029_PF03508	Connexin~Connexin43	1	1	1	1	1	1	1	1	1	1
PF00029_PF03509	Connexin~Connexin50	1	1	1	1	1	1	1	1	1	1
PF00029_PF16791	Connexin~Connexin40_C	1	1	1	1	1	1	1	1	1	1
PF00035_PF00069	dsrm~Pkinase	1	1	1	1	1	1	1	1	1	1
PF00040_PF08238	fn2~Sel1	1	1	1	1	1	1	1	1	1	1
PF00061_PF00014	Lipocalin~Kunitz_BPTI	1	1	1	1	1	1	1	1	1	1
PF00063_PF16521	Myosin_head~Myosin-VI_CBD	1	1	1	1	1	1	1	1	1	1
PF00069_PF08826	Pkinase~DMPK_coil	1	1	1	1	1	1	1	1	1	1
PF00069_PF13646	Pkinase~HEAT_2	1	1	1	1	1	1	1	1	1	1
PF00069_PF14593	Pkinase~PH_3	1	1	1	1	1	1	1	1	1	1
PF00071_PF00226	Ras~DnaJ	1	1	1	1	1	1	1	1	1	1
PF00081_PF02777	Sod_Fe_N~Sod_Fe_C	1	1	1	1	1	1	1	1	1	1
PF00084_PF09014	Sushi~Sushi_2	1	1	1	1	1	1	1	1	1	1
PF00085_PF00462	Thioredoxin~Glutaredoxin	1	1	1	1	1	1	1	1	1	1
PF00085_PF06201	Thioredoxin~PITH	1	1	1	1	1	1	1	1	1	1
PF00093_PF00094	VWC~VWD	1	1	1	1	1	1	1	1	1	1
PF00149_PF05011	Metallophos~DBR1	1	1	1	1	1	1	1	1	1	1
PF00160_PF00076	Pro_isomerase~RRM_1	1	1	1	1	1	1	1	1	1	1
PF00168_PF02845	C2~CUE	1	1	1	1	1	1	1	1	1	1
PF00169_PF01852	PH~START	1	1	1	1	1	1	1	1	1	1
PF00169_PF08718	PH~GLTP	1	1	1	1	1	1	1	1	1	1
PF00169_PF13901	PH~zf-RING_9	1	1	1	1	1	1	1	1	1	1
PF00179_PF00627	UQ_con~UBA	1	1	1	1	1	1	1	1	1	1
PF00193_PF00431	Xlink~CUB	1	1	1	1	1	1	1	1	1	1
PF00199_PF06628	Catalase~Catalase-rel	1	1	1	1	1	1	1	1	1	1
PF00206_PF10397	Lyase_1~ADSL_C	1	1	1	1	1	1	1	1	1	1
PF00206_PF14698	Lyase_1~ASL_C2	1	1	1	1	1	1	1	1	1	1
PF00225_PF00400	Kinesin~WD40	1	1	1	1	1	1	1	1	1	1
PF00225_PF13931	Kinesin~Microtub_bind	1	1	1	1	1	1	1	1	1	1
PF00225_PF15908	Kinesin~HMMR_C	1	1	1	1	1	1	1	1	1	1
PF00226_PF00076	DnaJ~RRM_1	1	1	1	1	1	1	1	1	1	1
PF00226_PF02889	DnaJ~Sec63	1	1	1	1	1	1	1	1	1	1
PF00226_PF11875	DnaJ~DUF3395	1	1	1	1	1	1	1	1	1	1
PF00226_PF14901	DnaJ~Jiv90	1	1	1	1	1	1	1	1	1	1
PF00240_PF03031	ubiquitin~NIF	1	1	1	1	1	1	1	1	1	1
PF00240_PF12057	ubiquitin~DUF3538	1	1	1	1	1	1	1	1	1	1
PF00249_PF04433	Myb_DNA-binding~SWIRM	1	1	1	1	1	1	1	1	1	1
PF00271_PF12513	Helicase_C~SUV3_C	1	1	1	1	1	1	1	1	1	1
PF00313_PF12901	CSD~SUZ-C	1	1	1	1	1	1	1	1	1	1
PF00341_PF14554	PDGF~VEGF_C	1	1	1	1	1	1	1	1	1	1
PF00364_PF00198	Biotin_lipoyl~2-oxoacid_dh	1	1	1	1	1	1	1	1	1	1
PF00397_PF12237	WW~PCIF1_WW	1	1	1	1	1	1	1	1	1	1
PF00400_PF00018	WD40~SH3_1	1	1	1	1	1	1	1	1	1	1
PF00400_PF04053	WD40~Coatomer_WDAD	1	1	1	1	1	1	1	1	1	1
PF00400_PF08625	WD40~Utp13	1	1	1	1	1	1	1	1	1	1
PF00400_PF09384	WD40~UTP15_C	1	1	1	1	1	1	1	1	1	1
PF00400_PF11816	WD40~DUF3337	1	1	1	1	1	1	1	1	1	1
PF00400_PF13925	WD40~Katanin_con80	1	1	1	1	1	1	1	1	1	1
PF00400_PF15512	WD40~CAF-1_p60_C	1	1	1	1	1	1	1	1	1	1
PF00403_PF00080	HMA~Sod_Cu	1	1	1	1	1	1	1	1	1	1
PF00412_PF00880	LIM~Nebulin	1	1	1	1	1	1	1	1	1	1
PF00431_PF00089	CUB~Trypsin	1	1	1	1	1	1	1	1	1	1
PF00439_PF00855	Bromodomain~PWWP	1	1	1	1	1	1	1	1	1	1
PF00485_PF14681	PRK~UPRTase	1	1	1	1	1	1	1	1	1	1
PF00505_PF09667	HMG_box~DUF2028	1	1	1	1	1	1	1	1	1	1
PF00565_PF00567	SNase~TUDOR	1	1	1	1	1	1	1	1	1	1
PF00566_PF15733	RabGAP-TBC~DUF4682	1	1	1	1	1	1	1	1	1	1
PF00575_PF07541	S1~EIF_2_alpha	1	1	1	1	1	1	1	1	1	1
PF00579_PF01588	tRNA-synt_1b~tRNA_bind	1	1	1	1	1	1	1	1	1	1
PF00587_PF03129	tRNA-synt_2b~HGTP_anticodon	1	1	1	1	1	1	1	1	1	1
PF00595_PF00063	PDZ~Myosin_head	1	1	1	1	1	1	1	1	1	1
PF00595_PF02181	PDZ~FH2	1	1	1	1	1	1	1	1	1	1
PF00616_PF02204	RasGAP~VPS9	1	1	1	1	1	1	1	1	1	1
PF00628_PF13832	PHD~zf-HC5HC2H_2	1	1	1	1	1	1	1	1	1	1
PF00628_PF16737	PHD~PHF12_MRG_bd	1	1	1	1	1	1	1	1	1	1
PF00642_PF16543	zf-CCCH~DFRP_C	1	1	1	1	1	1	1	1	1	1
PF00643_PF00917	zf-B_box~MATH	1	1	1	1	1	1	1	1	1	1
PF00643_PF12126	zf-B_box~DUF3583	1	1	1	1	1	1	1	1	1	1
PF00650_PF00102	CRAL_TRIO~Y_phosphatase	1	1	1	1	1	1	1	1	1	1
PF00650_PF00635	CRAL_TRIO~Motile_Sperm	1	1	1	1	1	1	1	1	1	1
PF00651_PF09494	BTB~Slx4	1	1	1	1	1	1	1	1	1	1
PF00651_PF13912	BTB~zf-C2H2_6	1	1	1	1	1	1	1	1	1	1
PF00705_PF02747	PCNA_N~PCNA_C	1	1	1	1	1	1	1	1	1	1
PF00730_PF00633	HhH-GPD~HHH	1	1	1	1	1	1	1	1	1	1
PF00732_PF05199	GMC_oxred_N~GMC_oxred_C	1	1	1	1	1	1	1	1	1	1
PF00750_PF05746	tRNA-synt_1d~DALR_1	1	1	1	1	1	1	1	1	1	1
PF00773_PF17215	RNB~Rrp44_S1	1	1	1	1	1	1	1	1	1	1
PF00784_PF00620	MyTH4~RhoGAP	1	1	1	1	1	1	1	1	1	1
PF00850_PF02148	Hist_deacetyl~zf-UBP	1	1	1	1	1	1	1	1	1	1
PF00878_PF00040	CIMR~fn2	1	1	1	1	1	1	1	1	1	1
PF00882_PF01839	Zn_dep_PLPC~FG-GAP	1	1	1	1	1	1	1	1	1	1
PF00887_PF00378	ACBP~ECH_1	1	1	1	1	1	1	1	1	1	1
PF00887_PF12796	ACBP~Ank_2	1	1	1	1	1	1	1	1	1	1
PF00887_PF13897	ACBP~GOLD_2	1	1	1	1	1	1	1	1	1	1
PF00890_PF02910	FAD_binding_2~Succ_DH_flav_C	1	1	1	1	1	1	1	1	1	1
PF00899_PF00581	ThiF~Rhodanese	1	1	1	1	1	1	1	1	1	1
PF00899_PF08825	ThiF~E2_bind	1	1	1	1	1	1	1	1	1	1
PF00994_PF01507	MoCF_biosynth~PAPS_reduct	1	1	1	1	1	1	1	1	1	1
PF01012_PF00766	ETF~ETF_alpha	1	1	1	1	1	1	1	1	1	1
PF01033_PF00112	Somatomedin_B~Peptidase_C1	1	1	1	1	1	1	1	1	1	1
PF01033_PF09412	Somatomedin_B~XendoU	1	1	1	1	1	1	1	1	1	1
PF01108_PF07140	Tissue_fac~IFNGR1	1	1	1	1	1	1	1	1	1	1
PF01114_PF02740	Colipase~Colipase_C	1	1	1	1	1	1	1	1	1	1
PF01145_PF02036	Band_7~SCP2	1	1	1	1	1	1	1	1	1	1
PF01172_PF09377	SBDS~SBDS_C	1	1	1	1	1	1	1	1	1	1
PF01202_PF14821	SKI~Thr_synth_N	1	1	1	1	1	1	1	1	1	1
PF01207_PF00035	Dus~dsrm	1	1	1	1	1	1	1	1	1	1
PF01239_PF07711	PPTA~RabGGT_insert	1	1	1	1	1	1	1	1	1	1
PF01243_PF10590	Pyridox_oxidase~PNPOx_C	1	1	1	1	1	1	1	1	1	1
PF01286_PF05181	XPA_N~XPA_C	1	1	1	1	1	1	1	1	1	1
PF01302_PF16641	CAP_GLY~CLIP1_ZNF	1	1	1	1	1	1	1	1	1	1
PF01363_PF11979	FYVE~DUF3480	1	1	1	1	1	1	1	1	1	1
PF01363_PF16696	FYVE~ZFYVE21_C	1	1	1	1	1	1	1	1	1	1
PF01368_PF02833	DHH~DHHA2	1	1	1	1	1	1	1	1	1	1
PF01379_PF03900	Porphobil_deam~Porphobil_deamC	1	1	1	1	1	1	1	1	1	1
PF01391_PF02191	Collagen~OLF	1	1	1	1	1	1	1	1	1	1
PF01399_PF08375	PCI~Rpn3_C	1	1	1	1	1	1	1	1	1	1
PF01401_PF16959	Peptidase_M2~Collectrin	1	1	1	1	1	1	1	1	1	1
PF01408_PF09166	GFO_IDH_MocA~Biliv-reduc_cat	1	1	1	1	1	1	1	1	1	1
PF01422_PF01424	zf-NF-X1~R3H	1	1	1	1	1	1	1	1	1	1
PF01467_PF01121	CTP_transf_like~CoaE	1	1	1	1	1	1	1	1	1	1
PF01529_PF07653	zf-DHHC~SH3_2	1	1	1	1	1	1	1	1	1	1
PF01530_PF01853	zf-C2HC~MOZ_SAS	1	1	1	1	1	1	1	1	1	1
PF01532_PF02225	Glyco_hydro_47~PA	1	1	1	1	1	1	1	1	1	1
PF01553_PF13833	Acyltransferase~EF-hand_8	1	1	1	1	1	1	1	1	1	1
PF01571_PF08669	GCV_T~GCV_T_C	1	1	1	1	1	1	1	1	1	1
PF01585_PF00076	G-patch~RRM_1	1	1	1	1	1	1	1	1	1	1
PF01585_PF01728	G-patch~FtsJ	1	1	1	1	1	1	1	1	1	1
PF01585_PF13821	G-patch~DUF4187	1	1	1	1	1	1	1	1	1	1
PF01602_PF14807	Adaptin_N~AP4E_app_platf	1	1	1	1	1	1	1	1	1	1
PF01642_PF02310	MM_CoA_mutase~B12-binding	1	1	1	1	1	1	1	1	1	1
PF01661_PF13716	Macro~CRAL_TRIO_2	1	1	1	1	1	1	1	1	1	1
PF01693_PF00075	Cauli_VI~RNase_H	1	1	1	1	1	1	1	1	1	1
PF01694_PF00627	Rhomboid~UBA	1	1	1	1	1	1	1	1	1	1
PF01743_PF12627	PolyA_pol~PolyA_pol_RNAbd	1	1	1	1	1	1	1	1	1	1
PF01751_PF01131	Toprim~Topoisom_bac	1	1	1	1	1	1	1	1	1	1
PF01753_PF00567	zf-MYND~TUDOR	1	1	1	1	1	1	1	1	1	1
PF01778_PF04874	Ribosomal_L28e~Mak16	1	1	1	1	1	1	1	1	1	1
PF01798_PF09785	Nop~Prp31_C	1	1	1	1	1	1	1	1	1	1
PF01833_PF15469	TIG~Sec5	1	1	1	1	1	1	1	1	1	1
PF01842_PF00351	ACT~Biopterin_H	1	1	1	1	1	1	1	1	1	1
PF01847_PF17211	VHL~VHL_C	1	1	1	1	1	1	1	1	1	1
PF01851_PF13646	PC_rep~HEAT_2	1	1	1	1	1	1	1	1	1	1
PF01926_PF06071	MMR_HSR1~YchF-GTPase_C	1	1	1	1	1	1	1	1	1	1
PF02014_PF03351	Reeler~DOMON	1	1	1	1	1	1	1	1	1	1
PF02017_PF09033	CIDE-N~DFF-C	1	1	1	1	1	1	1	1	1	1
PF02017_PF09230	CIDE-N~DFF40	1	1	1	1	1	1	1	1	1	1
PF02037_PF16294	SAP~RSB_motif	1	1	1	1	1	1	1	1	1	1
PF02055_PF17189	Glyco_hydro_30~Glyco_hydro_30C	1	1	1	1	1	1	1	1	1	1
PF02057_PF17387	Glyco_hydro_59	1	1	1	1	1	1	1	1	1	1
PF02138_PF01363	Beach~FYVE	1	1	1	1	1	1	1	1	1	1
PF02140_PF14851	Gal_Lectin~FAM176	1	1	1	1	1	1	1	1	1	1
PF02145_PF00780	Rap_GAP~CNH	1	1	1	1	1	1	1	1	1	1
PF02165_PF00096	WT1~zf-C2H2	1	1	1	1	1	1	1	1	1	1
PF02188_PF02145	GoLoco~Rap_GAP	1	1	1	1	1	1	1	1	1	1
PF02190_PF03226	LON_substr_bdg~Yippee-Mis18	1	1	1	1	1	1	1	1	1	1
PF02207_PF13764	zf-UBR~E3_UbLigase_R4	1	1	1	1	1	1	1	1	1	1
PF02259_PF00454	FAT~PI3_PI4_kinase	1	1	1	1	1	1	1	1	1	1
PF02318_PF04698	FYVE_2~Rab_eff_C	1	1	1	1	1	1	1	1	1	1
PF02350_PF00480	Epimerase_2~ROK	1	1	1	1	1	1	1	1	1	1
PF02437_PF15223	Ski_Sno~DUF4584	1	1	1	1	1	1	1	1	1	1
PF02629_PF00549	CoA_binding~Ligase_CoA	1	1	1	1	1	1	1	1	1	1
PF02733_PF02734	Dak1~Dak2	1	1	1	1	1	1	1	1	1	1
PF02749_PF01729	QRPTase_N~QRPTase_C	1	1	1	1	1	1	1	1	1	1
PF02758_PF00619	PYRIN~CARD	1	1	1	1	1	1	1	1	1	1
PF02759_PF00169	RUN~PH	1	1	1	1	1	1	1	1	1	1
PF02759_PF00787	RUN~PX	1	1	1	1	1	1	1	1	1	1
PF02769_PF13507	AIRS_C~GATase_5	1	1	1	1	1	1	1	1	1	1
PF02820_PF00536	MBT~SAM_1	1	1	1	1	1	1	1	1	1	1
PF02893_PF02138	GRAM~Beach	1	1	1	1	1	1	1	1	1	1
PF02922_PF02806	CBM_48~Alpha-amylase_C	1	1	1	1	1	1	1	1	1	1
PF02934_PF02637	GatB_N~GatB_Yqey	1	1	1	1	1	1	1	1	1	1
PF03031_PF09309	NIF~FCP1_C	1	1	1	1	1	1	1	1	1	1
PF03089_PF13341	RAG2~RAG2_PHD	1	1	1	1	1	1	1	1	1	1
PF03172_PF00628	HSR~PHD	1	1	1	1	1	1	1	1	1	1
PF03224_PF11698	V-ATPase_H_N~V-ATPase_H_C	1	1	1	1	1	1	1	1	1	1
PF03256_PF00569	ANAPC10~ZZ	1	1	1	1	1	1	1	1	1	1
PF03256_PF00632	ANAPC10~HECT	1	1	1	1	1	1	1	1	1	1
PF03371_PF12871	PRP38~PRP38_assoc	1	1	1	1	1	1	1	1	1	1
PF03446_PF00393	NAD_binding_2~6PGD	1	1	1	1	1	1	1	1	1	1
PF03483_PF03484	B3_4~B5	1	1	1	1	1	1	1	1	1	1
PF03491_PF00209	5HT_transport_N~SNF	1	1	1	1	1	1	1	1	1	1
PF03528_PF09311	Rabaptin~Rab5-bind	1	1	1	1	1	1	1	1	1	1
PF03533_PF04406	SPO11_like~TP6A_N	1	1	1	1	1	1	1	1	1	1
PF03630_PF01937	Fumble~DUF89	1	1	1	1	1	1	1	1	1	1
PF03868_PF01159	Ribosomal_L6e_N~Ribosomal_L6e	1	1	1	1	1	1	1	1	1	1
PF03876_PF00575	SHS2_Rpb7-N~S1	1	1	1	1	1	1	1	1	1	1
PF03876_PF08292	SHS2_Rpb7-N~RNA_pol_Rbc25	1	1	1	1	1	1	1	1	1	1
PF03917_PF03199	GSH_synth_ATP~GSH_synthase	1	1	1	1	1	1	1	1	1	1
PF04063_PF04064	DUF383~DUF384	1	1	1	1	1	1	1	1	1	1
PF04068_PF04034	RLI~DUF367	1	1	1	1	1	1	1	1	1	1
PF04376_PF04377	ATE_N~ATE_C	1	1	1	1	1	1	1	1	1	1
PF04433_PF01593	SWIRM~Amino_oxidase	1	1	1	1	1	1	1	1	1	1
PF04446_PF14413	Thg1~Thg1C	1	1	1	1	1	1	1	1	1	1
PF04592_PF04593	SelP_N~SelP_C	1	1	1	1	1	1	1	1	1	1
PF04697_PF04696	Pinin_SDK_N~Pinin_SDK_memA	1	1	1	1	1	1	1	1	1	1
PF04734_PF17048	Ceramidase_alk~Ceramidse_alk_C	1	1	1	1	1	1	1	1	1	1
PF04814_PF00046	HNF-1_N~Homeobox	1	1	1	1	1	1	1	1	1	1
PF04821_PF05029	TIMELESS~TIMELESS_C	1	1	1	1	1	1	1	1	1	1
PF04841_PF04840	Vps16_N~Vps16_C	1	1	1	1	1	1	1	1	1	1
PF04857_PF00642	CAF1~zf-CCCH	1	1	1	1	1	1	1	1	1	1
PF05076_PF12470	SUFU~SUFU_C	1	1	1	1	1	1	1	1	1	1
PF05131_PF00637	Pep3_Vps18~Clathrin	1	1	1	1	1	1	1	1	1	1
PF05193_PF08367	Peptidase_M16_C~M16C_assoc	1	1	1	1	1	1	1	1	1	1
PF05383_PF12901	La~SUZ-C	1	1	1	1	1	1	1	1	1	1
PF05652_PF11969	DcpS~DcpS_C	1	1	1	1	1	1	1	1	1	1
PF05916_PF16922	Sld5~SLD5_C	1	1	1	1	1	1	1	1	1	1
PF06119_PF00094	NIDO~VWD	1	1	1	1	1	1	1	1	1	1
PF06220_PF00397	zf-U1~WW	1	1	1	1	1	1	1	1	1	1
PF06350_PF07859	HSL_N~Abhydrolase_3	1	1	1	1	1	1	1	1	1	1
PF06566_PF06567	Chon_Sulph_att~Neural_ProG_Cyt	1	1	1	1	1	1	1	1	1	1
PF06732_PF16589	Pescadillo_N~BRCT_2	1	1	1	1	1	1	1	1	1	1
PF06743_PF08373	FAST_1~RAP	1	1	1	1	1	1	1	1	1	1
PF06773_PF08945	Bim_N~Bclx_interact	1	1	1	1	1	1	1	1	1	1
PF07177_PF07525	Neuralized~SOCS_box	1	1	1	1	1	1	1	1	1	1
PF07524_PF00628	Bromo_TP~PHD	1	1	1	1	1	1	1	1	1	1
PF07524_PF10406	Bromo_TP~TAF8_C	1	1	1	1	1	1	1	1	1	1
PF07540_PF03914	NOC3p~CBF	1	1	1	1	1	1	1	1	1	1
PF07574_PF08746	SMC_Nse1~zf-RING-like	1	1	1	1	1	1	1	1	1	1
PF07647_PF00017	SAM_2~SH2	1	1	1	1	1	1	1	1	1	1
PF07686_PF10570	V-set~Myelin-PO_C	1	1	1	1	1	1	1	1	1	1
PF07706_PF00155	TAT_ubiq~Aminotran_1_2	1	1	1	1	1	1	1	1	1	1
PF07714_PF00619	Pkinase_Tyr~CARD	1	1	1	1	1	1	1	1	1	1
PF07716_PF06529	bZIP_2~Vert_IL3-reg_TF	1	1	1	1	1	1	1	1	1	1
PF07732_PF00754	Cu-oxidase_3~F5_F8_type_C	1	1	1	1	1	1	1	1	1	1
PF07742_PF07145	BTG~PAM2	1	1	1	1	1	1	1	1	1	1
PF07815_PF00018	Abi_HHR~SH3_1	1	1	1	1	1	1	1	1	1	1
PF07934_PF00730	OGG_N~HhH-GPD	1	1	1	1	1	1	1	1	1	1
PF07992_PF14721	Pyr_redox_2~AIF_C	1	1	1	1	1	1	1	1	1	1
PF07994_PF01658	NAD_binding_5~Inos-1-P_synth	1	1	1	1	1	1	1	1	1	1
PF08032_PF00588	SpoU_sub_bind~SpoU_methylase	1	1	1	1	1	1	1	1	1	1
PF08067_PF00013	ROKNT~KH_1	1	1	1	1	1	1	1	1	1	1
PF08127_PF00112	Propeptide_C1~Peptidase_C1	1	1	1	1	1	1	1	1	1	1
PF08145_PF00400	BOP1NT~WD40	1	1	1	1	1	1	1	1	1	1
PF08167_PF08166	RIX1~NUC202	1	1	1	1	1	1	1	1	1	1
PF08204_PF04549	V-set_CD47~CD47	1	1	1	1	1	1	1	1	1	1
PF08221_PF05645	HTH_9~RNA_pol_Rpc82	1	1	1	1	1	1	1	1	1	1
PF08311_PF00069	Mad3_BUB1_I~Pkinase	1	1	1	1	1	1	1	1	1	1
PF08397_PF02205	IMD~WH2	1	1	1	1	1	1	1	1	1	1
PF08418_PF04042	Pol_alpha_B_N~DNA_pol_E_B	1	1	1	1	1	1	1	1	1	1
PF08513_PF10607	LisH~CLTH	1	1	1	1	1	1	1	1	1	1
PF08517_PF00505	AXH~HMG_box	1	1	1	1	1	1	1	1	1	1
PF08558_PF00249	TRF~Myb_DNA-binding	1	1	1	1	1	1	1	1	1	1
PF08567_PF03909	PH_TFIIH~BSD	1	1	1	1	1	1	1	1	1	1
PF08585_PF16099	RMI1_N~RMI1_C	1	1	1	1	1	1	1	1	1	1
PF08621_PF08620	RPAP1_N~RPAP1_C	1	1	1	1	1	1	1	1	1	1
PF08700_PF16528	Vps51~Exo84_C	1	1	1	1	1	1	1	1	1	1
PF08711_PF00642	Med26~zf-CCCH	1	1	1	1	1	1	1	1	1	1
PF08740_PF00004	BCS1_N~AAA	1	1	1	1	1	1	1	1	1	1
PF08755_PF04379	YccV-like~DUF525	1	1	1	1	1	1	1	1	1	1
PF08773_PF00112	CathepsinC_exc~Peptidase_C1	1	1	1	1	1	1	1	1	1	1
PF08799_PF00400	PRP4~WD40	1	1	1	1	1	1	1	1	1	1
PF08839_PF16679	CDT1~CDT1_C	1	1	1	1	1	1	1	1	1	1
PF08911_PF00638	NUP50~Ran_BP1	1	1	1	1	1	1	1	1	1	1
PF08917_PF07714	ecTbetaR2~Pkinase_Tyr	1	1	1	1	1	1	1	1	1	1
PF09011_PF13017	HMG_box_2~Maelstrom	1	1	1	1	1	1	1	1	1	1
PF09034_PF00531	TRADD_N~Death	1	1	1	1	1	1	1	1	1	1
PF09193_PF00001	CholecysA-Rec_N~7tm_1	1	1	1	1	1	1	1	1	1	1
PF09202_PF01163	Rio2_N~RIO1	1	1	1	1	1	1	1	1	1	1
PF09272_PF00089	Hepsin-SRCR~Trypsin	1	1	1	1	1	1	1	1	1	1
PF09298_PF01557	FAA_hydrolase_N~FAA_hydrolase	1	1	1	1	1	1	1	1	1	1
PF09303_PF03185	KcnmB2_inactiv~CaKB	1	1	1	1	1	1	1	1	1	1
PF09329_PF09332	zf-primase~Mcm10	1	1	1	1	1	1	1	1	1	1
PF09409_PF00789	PUB~UBX	1	1	1	1	1	1	1	1	1	1
PF09416_PF13087	UPF1_Zn_bind~AAA_12	1	1	1	1	1	1	1	1	1	1
PF09465_PF01222	LBR_tudor~ERG4_ERG24	1	1	1	1	1	1	1	1	1	1
PF09750_PF01805	DRY_EERY~Surp	1	1	1	1	1	1	1	1	1	1
PF09765_PF11793	WD-3~FANCL_C	1	1	1	1	1	1	1	1	1	1
PF09779_PF10476	Ima1_N~DUF2448	1	1	1	1	1	1	1	1	1	1
PF10162_PF15711	G8~ILEI	1	1	1	1	1	1	1	1	1	1
PF10174_PF09457	Cast~RBD-FIP	1	1	1	1	1	1	1	1	1	1
PF10197_PF12542	Cir_N~CWC25	1	1	1	1	1	1	1	1	1	1
PF10354_PF03147	DUF2431~FDX-ACB	1	1	1	1	1	1	1	1	1	1
PF10363_PF10304	RTP1_C1~RTP1_C2	1	1	1	1	1	1	1	1	1	1
PF10374_PF10373	EST1~EST1_DNA_bind	1	1	1	1	1	1	1	1	1	1
PF10413_PF00001	Rhodopsin_N~7tm_1	1	1	1	1	1	1	1	1	1	1
PF10444_PF10512	Nbl1_Borealin_N~Borealin	1	1	1	1	1	1	1	1	1	1
PF10475_PF10474	Vps54_N~DUF2451	1	1	1	1	1	1	1	1	1	1
PF11416_PF05739	Syntaxin-5_N~SNARE	1	1	1	1	1	1	1	1	1	1
PF11532_PF00076	HnRNP_M~RRM_1	1	1	1	1	1	1	1	1	1	1
PF11566_PF12937	PI31_Prot_N~F-box-like	1	1	1	1	1	1	1	1	1	1
PF11587_PF00377	Prion_bPrPp~Prion	1	1	1	1	1	1	1	1	1	1
PF11704_PF16692	Folliculin~Folliculin_C	1	1	1	1	1	1	1	1	1	1
PF11707_PF16201	Npa1~NopRA1	1	1	1	1	1	1	1	1	1	1
PF11817_PF12742	Foie-gras_1~Gryzun-like	1	1	1	1	1	1	1	1	1	1
PF11957_PF00531	efThoc1~Death	1	1	1	1	1	1	1	1	1	1
PF12012_PF02214	DUF3504~BTB_2	1	1	1	1	1	1	1	1	1	1
PF12016_PF00928	Stonin2_N~Adap_comp_sub	1	1	1	1	1	1	1	1	1	1
PF12038_PF00534	DUF3524~Glycos_transf_1	1	1	1	1	1	1	1	1	1	1
PF12066_PF04959	DUF3546~ARS2	1	1	1	1	1	1	1	1	1	1
PF12109_PF00001	CXCR4_N~7tm_1	1	1	1	1	1	1	1	1	1	1
PF12213_PF04042	Dpoe2NT~DNA_pol_E_B	1	1	1	1	1	1	1	1	1	1
PF12215_PF04685	Glyco_hydr_116N~DUF608	1	1	1	1	1	1	1	1	1	1
PF12220_PF00076	U1snRNP70_N~RRM_1	1	1	1	1	1	1	1	1	1	1
PF12329_PF12325	TMF_DNA_bd~TMF_TATA_bd	1	1	1	1	1	1	1	1	1	1
PF12483_PF13920	GIDE~zf-C3HC4_3	1	1	1	1	1	1	1	1	1	1
PF12510_PF00307	Smoothelin~CH	1	1	1	1	1	1	1	1	1	1
PF12530_PF11229	DUF3730~Focadhesin	1	1	1	1	1	1	1	1	1	1
PF12755_PF11916	Vac14_Fab1_bd~Vac14_Fig4_bd	1	1	1	1	1	1	1	1	1	1
PF12765_PF12830	Cohesin_HEAT~Nipped-B_C	1	1	1	1	1	1	1	1	1	1
PF12796_PF01529	Ank_2~zf-DHHC	1	1	1	1	1	1	1	1	1	1
PF12796_PF16553	Ank_2~PUFD	1	1	1	1	1	1	1	1	1	1
PF12796_PF16700	Ank_2~SNCAIP_SNCA_bd	1	1	1	1	1	1	1	1	1	1
PF12874_PF16835	zf-met~SF3A2	1	1	1	1	1	1	1	1	1	1
PF12895_PF04564	ANAPC3~U-box	1	1	1	1	1	1	1	1	1	1
PF12922_PF12717	Cnd1_N~Cnd1	1	1	1	1	1	1	1	1	1	1
PF12937_PF13245	F-box-like~AAA_19	1	1	1	1	1	1	1	1	1	1
PF12937_PF13516	F-box-like~LRR_6	1	1	1	1	1	1	1	1	1	1
PF13085_PF13534	Fer2_3~Fer4_17	1	1	1	1	1	1	1	1	1	1
PF13249_PF13243	SQHop_cyclase_N~SQHop_cyclase_C	1	1	1	1	1	1	1	1	1	1
PF13306_PF07679	LRR_5~I-set	1	1	1	1	1	1	1	1	1	1
PF13339_PF08164	AATF-Che1~TRAUB	1	1	1	1	1	1	1	1	1	1
PF13369_PF08755	Transglut_core2~YccV-like	1	1	1	1	1	1	1	1	1	1
PF13414_PF00226	TPR_11~DnaJ	1	1	1	1	1	1	1	1	1	1
PF13423_PF00929	UCH_1~RNase_T	1	1	1	1	1	1	1	1	1	1
PF13424_PF12895	TPR_12~ANAPC3	1	1	1	1	1	1	1	1	1	1
PF13426_PF00069	PAS_9~Pkinase	1	1	1	1	1	1	1	1	1	1
PF13445_PF00642	zf-RING_UBOX~zf-CCCH	1	1	1	1	1	1	1	1	1	1
PF13589_PF06470	HATPase_c_3~SMC_hinge	1	1	1	1	1	1	1	1	1	1
PF13604_PF13087	AAA_30~AAA_12	1	1	1	1	1	1	1	1	1	1
PF13604_PF13538	AAA_30~UvrD_C_2	1	1	1	1	1	1	1	1	1	1
PF13639_PF02845	zf-RING_2~CUE	1	1	1	1	1	1	1	1	1	1
PF13660_PF05161	DUF4147~MOFRL	1	1	1	1	1	1	1	1	1	1
PF13661_PF10637	2OG-FeII_Oxy_4~Ofd1_CTDD	1	1	1	1	1	1	1	1	1	1
PF13671_PF05881	AAA_33~CNPase	1	1	1	1	1	1	1	1	1	1
PF13691_PF12706	Lactamase_B_4~Lactamase_B_2	1	1	1	1	1	1	1	1	1	1
PF13696_PF17180	zf-CCHC_2~zf-3CxxC_2	1	1	1	1	1	1	1	1	1	1
PF13771_PF00632	zf-HC5HC2H~HECT	1	1	1	1	1	1	1	1	1	1
PF13775_PF00505	DUF4171~HMG_box	1	1	1	1	1	1	1	1	1	1
PF13846_PF13926	DUF4196~DUF4211	1	1	1	1	1	1	1	1	1	1
PF13855_PF00481	LRR_8~PP2C	1	1	1	1	1	1	1	1	1	1
PF13855_PF01463	LRR_8~LRRCT	1	1	1	1	1	1	1	1	1	1
PF13855_PF08477	LRR_8~Roc	1	1	1	1	1	1	1	1	1	1
PF13855_PF15176	LRR_8~LRR19-TM	1	1	1	1	1	1	1	1	1	1
PF13905_PF01436	Thioredoxin_8~NHL	1	1	1	1	1	1	1	1	1	1
PF13920_PF02825	zf-C3HC4_3~WWE	1	1	1	1	1	1	1	1	1	1
PF13923_PF02037	zf-C3HC4_2~SAP	1	1	1	1	1	1	1	1	1	1
PF13923_PF08941	zf-C3HC4_2~USP8_interact	1	1	1	1	1	1	1	1	1	1
PF14237_PF00226	DUF4339~DnaJ	1	1	1	1	1	1	1	1	1	1
PF14382_PF15985	ECR1_N~KH_6	1	1	1	1	1	1	1	1	1	1
PF14444_PF14443	S1-like~DBC1	1	1	1	1	1	1	1	1	1	1
PF14500_PF12460	MMS19_N~MMS19_C	1	1	1	1	1	1	1	1	1	1
PF14520_PF08423	HHH_5~Rad51	1	1	1	1	1	1	1	1	1	1
PF14555_PF16158	UBA_4~N_BRCA1_IG	1	1	1	1	1	1	1	1	1	1
PF14570_PF00076	zf-RING_4~RRM_1	1	1	1	1	1	1	1	1	1	1
PF14580_PF14560	LRR_9~Ubiquitin_2	1	1	1	1	1	1	1	1	1	1
PF14604_PF12026	SH3_9~DUF3513	1	1	1	1	1	1	1	1	1	1
PF14643_PF14644	DUF4455~DUF4456	1	1	1	1	1	1	1	1	1	1
PF14655_PF14656	RAB3GAP2_N~RAB3GAP2_C	1	1	1	1	1	1	1	1	1	1
PF14670_PF00100	FXa_inhibition~Zona_pellucida	1	1	1	1	1	1	1	1	1	1
PF14687_PF14688	DUF4460~DUF4461	1	1	1	1	1	1	1	1	1	1
PF14700_PF00940	RPOL_N~RNA_pol	1	1	1	1	1	1	1	1	1	1
PF14727_PF14728	PHTB1_N~PHTB1_C	1	1	1	1	1	1	1	1	1	1
PF14737_PF14740	DUF4470~DUF4471	1	1	1	1	1	1	1	1	1	1
PF14772_PF14775	NYD-SP28~NYD-SP28_assoc	1	1	1	1	1	1	1	1	1	1
PF15005_PF16706	IZUMO~Izumo-Ig	1	1	1	1	1	1	1	1	1	1
PF15025_PF15016	DUF4524~DUF4520	1	1	1	1	1	1	1	1	1	1
PF15027_PF15024	DUF4525~Glyco_transf_18	1	1	1	1	1	1	1	1	1	1
PF15227_PF00536	zf-C3HC4_4~SAM_1	1	1	1	1	1	1	1	1	1	1
PF15255_PF05177	CAP-ZIP_m~RCSD	1	1	1	1	1	1	1	1	1	1
PF15277_PF09763	Sec3-PIP2_bind~Sec3_C	1	1	1	1	1	1	1	1	1	1
PF15285_PF04111	BH3~APG6	1	1	1	1	1	1	1	1	1	1
PF15353_PF16002	HECA~Headcase	1	1	1	1	1	1	1	1	1	1
PF15492_PF08314	Nbas_N~Sec39	1	1	1	1	1	1	1	1	1	1
PF15612_PF00628	WHIM1~PHD	1	1	1	1	1	1	1	1	1	1
PF15865_PF03511	Fanconi_A_N~Fanconi_A	1	1	1	1	1	1	1	1	1	1
PF15867_PF13877	Dynein_attach_N~RPAP3_C	1	1	1	1	1	1	1	1	1	1
PF15902_PF15901	Sortilin-Vps10~Sortilin_C	1	1	1	1	1	1	1	1	1	1
PF15905_PF15908	HMMR_N~HMMR_C	1	1	1	1	1	1	1	1	1	1
PF15924_PF00534	ALG11_N~Glycos_transf_1	1	1	1	1	1	1	1	1	1	1
PF16050_PF05179	CDC73_N~CDC73_C	1	1	1	1	1	1	1	1	1	1
PF16171_PF15511	CENP-T_N~CENP-T_C	1	1	1	1	1	1	1	1	1	1
PF16177_PF00501	ACAS_N~AMP-binding	1	1	1	1	1	1	1	1	1	1
PF16275_PF00013	SF1-HH~KH_1	1	1	1	1	1	1	1	1	1	1
PF16282_PF05499	SANT_DAMP1_like~DMAP1	1	1	1	1	1	1	1	1	1	1
PF16320_PF00542	Ribosomal_L12_N~Ribosomal_L12	1	1	1	1	1	1	1	1	1	1
PF16420_PF00899	ATG7_N~ThiF	1	1	1	1	1	1	1	1	1	1
PF16491_PF01435	Peptidase_M48_N~Peptidase_M48	1	1	1	1	1	1	1	1	1	1
PF16507_PF11919	BLM10_mid~DUF3437	1	1	1	1	1	1	1	1	1	1
PF16622_PF16624	zf-C2H2_11~zf-C2H2_assoc2	1	1	1	1	1	1	1	1	1	1
PF16661_PF10996	Lactamase_B_6~Beta-Casp	1	1	1	1	1	1	1	1	1	1
PF16685_PF16682	zf-RING_10~MSL2-CXC	1	1	1	1	1	1	1	1	1	1
PF16704_PF01465	Rab_bind~GRIP	1	1	1	1	1	1	1	1	1	1
PF16725_PF00004	Nucleolin_bd~AAA	1	1	1	1	1	1	1	1	1	1
PF16752_PF07986	TBCC_N~TBCC	1	1	1	1	1	1	1	1	1	1
PF16770_PF12796	RTT107_BRCT_5~Ank_2	1	1	1	1	1	1	1	1	1	1
PF16840_PF00022	ACTL7A_N~Actin	1	1	1	1	1	1	1	1	1	1
PF16923_PF03200	Glyco_hydro_63N~Glyco_hydro_63	1	1	1	1	1	1	1	1	1	1
PF17121_PF06391	zf-C3HC4_5~MAT1	1	1	1	1	1	1	1	1	1	1
PF17172_PF17171	GST_N_4~GST_C_6	1	1	1	1	1	1	1	1	1	1
PF17408_PF05292	MCD	1	1	1	1	1	1	1	1	1	1
PF00038_PF07142	Filament~DUF1388	1	1	1	1	1		1	1	1	1
PF00092_PF00041	VWA~fn3	1	1	1	1	1		1	1	1	1
PF00093_PF13855	VWC~LRR_8	1	1	1	1	1		1	1	1	1
PF00307_PF00778	CH~DIX	1	1	1	1	1		1	1	1	1
PF00413_PF01549	Peptidase_M10~ShK	1	1	1	1	1		1	1	1	1
PF00467_PF17136	KOW~ribosomal_L24	1	1	1	1	1		1	1	1	1
PF00595_PF06456	PDZ~Arfaptin	1	1	1	1	1		1	1	1	1
PF00627_PF00789	UBA~UBX	1	1	1	1	1		1	1	1	1
PF00641_PF00648	zf-RanBP~Peptidase_C2	1	1	1	1	1		1	1	1	1
PF00787_PF04212	PX~MIT	1	1	1	1	1		1	1	1	1
PF01302_PF12455	CAP_GLY~Dynactin	1	1	1	1	1		1	1	1	1
PF01411_PF07973	tRNA-synt_2c~tRNA_SAD	1	1	1	1	1		1	1	1	1
PF01602_PF06375	Adaptin_N~AP3D1	1	1	1	1	1		1	1	1	1
PF01602_PF14796	Adaptin_N~AP3B1_C	1	1	1	1	1		1	1	1	1
PF01715_PF12171	IPPT~zf-C2H2_jaz	1	1	1	1	1		1	1	1	1
PF02142_PF01808	MGS~AICARFT_IMPCHas	1	1	1	1	1		1	1	1	1
PF02778_PF01974	tRNA_int_endo_N~tRNA_int_endo	1	1	1	1	1		1	1	1	1
PF02854_PF04050	MIF4G~Upf2	1	1	1	1	1		1	1	1	1
PF04212_PF00069	MIT~Pkinase	1	1	1	1	1		1	1	1	1
PF05178_PF12936	Kri1~Kri1_C	1	1	1	1	1		1	1	1	1
PF06221_PF04266	zf-C2HC5~ASCH	1	1	1	1	1		1	1	1	1
PF06400_PF06401	Alpha-2-MRAP_N~Alpha-2-MRAP_C	1	1	1	1	1		1	1	1	1
PF06424_PF14559	PRP1_N~TPR_19	1	1	1	1	1		1	1	1	1
PF06588_PF13415	Muskelin_N~Kelch_3	1	1	1	1	1		1	1	1	1
PF08271_PF00382	TF_Zn_Ribbon~TFIIB	1	1	1	1	1		1	1	1	1
[truncated: 628 more rows]

## Sheet: S3C-domain complexity index =3
Table S3C- List showing the number of proteins in a proteome with a specific functional domain combination (complexity index 3): Highlighted in green are domain combinations specific to any one Afrotherian species.
Domain combinations	Domain description	L. africana	T. manatus	O. afer	C. asiatica	E. edwardii	E. telfairi	H. sapiens	M. musculus	E. caballus	B. taurus
PF00096_PF13894_PF13912	zf-C2H2~zf-C2H2_4~zf-C2H2_6	2
PF00008_PF07645_PF12661	EGF~EGF_CA~hEGF	1
PF00018_PF16621_PF08944	SH3_1~NECFESHC~p47_phox_C	1
PF00047_PF09191_PF05790	ig~CD4-extracel~C2-set	1
PF00090_PF02793_PF16489	TSP_1~HRM~GAIN	1
PF00094_PF08742_PF00007	VWD~C8~Cys_knot	1
PF00094_PF08742_PF05270	VWD~C8~AbfB	1
PF00105_PF00104_PF12743	zf-C4~Hormone_recep~ESR1_C	1
PF00130_PF16664_PF00018	C1_1~STAC2_u1~SH3_1	1
PF00168_PF00169_PF00779	C2~PH~BTK	1
PF00270_PF13234_PF08148	DEAD~rRNA_proc-arch~DSHCT	1
PF00271_PF02889_PF00270	Helicase_C~Sec63~DEAD	1
PF00373_PF09380_PF00769	FERM_M~FERM_C~ERM	1
PF00397_PF16623_PF00611	WW~WW_FCH_linker~FCH	1
PF00400_PF03451_PF12894	WD40~HELP~ANAPC4_WD40	1
PF00520_PF16905_PF16885	Ion_trans~GPHH~CAC1F_C	1
PF00615_PF00787_PF08628	RGS~PX~Nexin_C	1
PF00621_PF16652_PF00168	RhoGEF~PH_13~C2	1
PF00640_PF12473_PF00566	PID~DUF3694~RabGAP-TBC	1
PF00754_PF02210_PF00054	F5_F8_type_C~Laminin_G_2~Laminin_G_1	1
PF00781_PF00609_PF07647	DAGK_cat~DAGK_acc~SAM_2	1
PF01347_PF09172_PF06448	Vitellogenin_N~DUF1943~DUF1081	1
PF01392_PF00051_PF07714	Fz~Kringle~Pkinase_Tyr	1
PF01403_PF01833_PF08337	Sema~TIG~Plexin_cytopl	1
PF01630_PF05004_PF04836	Glyco_hydro_56~IFRD~IFRD_C	1
PF01636_PF02770_PF00441	APH~Acyl-CoA_dh_M~Acyl-CoA_dh_1	1
PF01839_PF13517_PF08441	FG-GAP~VCBS~Integrin_alpha2	1
PF02177_PF12925_PF10515	APP_N~APP_E2~APP_amyloid	1
PF02262_PF02761_PF02762	Cbl_N~Cbl_N2~Cbl_N3	1
PF02373_PF13831_PF13832	JmjC~PHD_2~zf-HC5HC2H_2	1
PF06469_PF14844_PF02138	DUF1088~PH_BEACH~Beach	1
PF06701_PF00569_PF12796	MIB_HERC2~ZZ~Ank_2	1
PF07645_PF02412_PF05735	EGF_CA~TSP_3~TSP_C	1
PF07645_PF14670_PF00058	EGF_CA~FXa_inhibition~Ldl_recept_b	1
PF07647_PF00620_PF00788	SAM_2~RhoGAP~RA	1
PF08385_PF08393_PF12774	DHC_N1~DHC_N2~AAA_6	1
PF10231_PF13424_PF13374	DUF2315~TPR_12~TPR_10	1
PF11515_PF03256_PF01485	Cul7~ANAPC10~IBR	1
PF12108_PF16837_PF11931	SF3a60_bindingd~SF3A3~DUF3449	1
PF12796_PF13637_PF00536	Ank_2~Ank_4~SAM_1	1
PF12796_PF13637_PF02205	Ank_2~Ank_4~WH2	1
PF13414_PF08321_PF00149	TPR_11~PPP5~Metallophos	1
PF13637_PF00023_PF01753	Ank_4~Ank~zf-MYND	1
PF13927_PF07679_PF00047	Ig_3~I-set~ig	1
PF14575_PF07714_PF00536	EphA2_TM~Pkinase_Tyr~SAM_1	1
PF14716_PF10391_PF14791	HHH_8~DNA_pol_lambd_f~DNA_pol_B_thumb	1
PF16363_PF03946_PF00298	GDP_Man_Dehyd~Ribosomal_L11_N~Ribosomal_L11	1
PF16880_PF01926_PF12763	EHD_N~MMR_HSR1~EF-hand_4	1
PF00008_PF12947_PF00431	EGF~EGF_3~CUB		1
PF00017_PF00018_PF00168	SH2~SH3_1~C2		1
PF00059_PF12662_PF09064	Lectin_C~cEGF~Tme5_EGF_like		1
PF00096_PF13465_PF13912	zf-C2H2~zf-H2C2_2~zf-C2H2_6		1
PF00096_PF13912_PF13465	zf-C2H2~zf-C2H2_6~zf-H2C2_2		1
PF00225_PF16183_PF12473	Kinesin~Kinesin_assoc~DUF3694		1
PF00535_PF02709_PF00652	Glycos_transf_2~Glyco_transf_7C~Ricin_B_lectin		1
PF00690_PF00122_PF00689	Cation_ATPase_N~E1-E2_ATPase~Cation_ATPase_C		1
PF00754_PF00008_PF02210	F5_F8_type_C~EGF~Laminin_G_2		1
PF00792_PF00613_PF00454	PI3K_C2~PI3Ka~PI3_PI4_kinase		1
PF00999_PF02319_PF08781	Na_H_Exchanger~E2F_TDP~DP		1
PF01030_PF00041_PF07714	Recep_L_domain~fn3~Pkinase_Tyr		1
PF01094_PF00003_PF10606	ANF_receptor~7tm_3~GluR_Homer-bdg		1
PF01471_PF00045_PF11857	PG_binding_1~Hemopexin~DUF3377		1
PF02023_PF04589_PF02257	SCAN~RFX1_trans_act~RFX_DNA_binding		1
PF02865_PF01017_PF00017	STAT_int~STAT_alpha~SH2		1
PF04810_PF04815_PF00626	zf-Sec23_Sec24~Sec23_helical~Gelsolin		1
PF05184_PF03489_PF02199	SapB_1~SapB_2~SapA		1
PF06467_PF04218_PF03221	zf-FCS~CENP-B_N~HTH_Tnp_Tc5		1
PF07648_PF13365_PF13180	Kazal_2~Trypsin_2~PDZ_2		1
PF07714_PF12796_PF13637	Pkinase_Tyr~Ank_2~Ank_4		1
PF07719_PF00515_PF13877	TPR_2~TPR_1~RPAP3_C		1
PF12894_PF04053_PF06957	ANAPC4_WD40~Coatomer_WDAD~COPI_C		1
PF13424_PF13181_PF07719	TPR_12~TPR_8~TPR_2		1
PF14691_PF07992_PF14697	Fer4_20~Pyr_redox_2~Fer4_21		1
PF14941_PF00157_PF00046	OAF~Pou~Homeobox		1
PF15005_PF01352_PF00096	IZUMO~KRAB~zf-C2H2		1
PF15790_PF07529_PF00271	EP400_N~HSA~Helicase_C		1
PF15949_PF00595_PF00412	DUF4757~PDZ~LIM		1
PF16768_PF03399_PF16769	NupH_GANP~SAC3_GANP~MCM3AP_GANP		1
PF17489_PF02994_PF17490	Transposase_22~Tnp_22_dsRBD		1
PF00077_PF00078_PF00075	RVP~RVT_1~RNase_H			3
PF00008_PF00054_PF02210	EGF~Laminin_G_1~Laminin_G_2			1
PF00018_PF03114_PF14604	SH3_1~BAR~SH3_9			1
PF00046_PF15288_PF07686	Homeobox~zf-CCHC_6~V-set			1
PF00047_PF08205_PF13927	ig~C2-set_2~Ig_3			1
PF00075_PF09337_PF00429	RNase_H~zf-H2C2~TLV_coat			1
PF00092_PF00008_PF07974	VWA~EGF~EGF_2			1
PF00096_PF01448_PF00249	zf-C2H2~ELM2~Myb_DNA-binding			1
PF00096_PF13912_PF13894	zf-C2H2~zf-C2H2_6~zf-C2H2_4			1
PF00097_PF00643_PF13765	zf-C3HC4~zf-B_box~PRY			1
PF00169_PF08947_PF00017	PH~BPS~SH2			1
PF00169_PF14429_PF06920	PH~DOCK-C2~DHR-2			1
PF00173_PF00970_PF00175	Cyt-b5~FAD_binding_6~NAD_binding_1			1
PF00270_PF00271_PF04408	DEAD~Helicase_C~HA2			1
PF00431_PF07974_PF13854	CUB~EGF_2~Kelch_5			1
PF00638_PF12185_PF00160	Ran_BP1~IR1-M~Pro_isomerase			1
PF00642_PF00076_PF00428	zf-CCCH~RRM_1~Ribosomal_60s			1
PF00794_PF00792_PF00613	PI3K_rbd~PI3K_C2~PI3Ka			1
PF00900_PF00467_PF16121	Ribosomal_S4e~KOW~40S_S4_C			1
PF01138_PF03725_PF03726	RNase_PH~RNase_PH_C~PNPase			1
PF01140_PF00077_PF00075	Gag_MA~RVP~RNase_H			1
PF01266_PF16350_PF01571	DAO~FAO_M~GCV_T			1
PF01352_PF09607_PF03221	KRAB~BrkDBD~HTH_Tnp_Tc5			1
PF01414_PF00008_PF07645	DSL~EGF~EGF_CA			1
PF02022_PF00665_PF00429	Integrase_Zn~rve~TLV_coat			1
PF02093_PF00044_PF02800	Gag_p30~Gp_dh_N~Gp_dh_C			1
PF02093_PF00664_PF00005	Gag_p30~ABC_membrane~ABC_tran			1
PF02375_PF02373_PF13831	JmjN~JmjC~PHD_2			1
PF02892_PF05699_PF00106	zf-BED~Dimer_Tnp_hAT~adh_short			1
PF07645_PF00058_PF14670	EGF_CA~Ldl_recept_b~FXa_inhibition			1
PF07648_PF13365_PF00595	Kazal_2~Trypsin_2~PDZ			1
PF07679_PF00041_PF00069	I-set~fn3~Pkinase			1
PF07738_PF06701_PF00632	Sad1_UNC~MIB_HERC2~HECT			1
PF08205_PF13895_PF07679	C2-set_2~Ig_2~I-set			1
PF10391_PF14792_PF14791	DNA_pol_lambd_f~DNA_pol_B_palm~DNA_pol_B_thumb			1
PF13431_PF14559_PF13432	TPR_17~TPR_19~TPR_16			1
PF13637_PF12796_PF00531	Ank_4~Ank_2~Death			1
PF13855_PF00307_PF15476	LRR_8~CH~SAP25			1
PF13855_PF07679_PF01825	LRR_8~I-set~GPS			1
PF13912_PF13465_PF00096	zf-C2H2_6~zf-H2C2_2~zf-C2H2			1
PF14836_PF00443_PF14533	Ubiquitin_3~UCH~USP7_C2			1
PF16470_PF00082_PF14843	S8_pro-domain~Peptidase_S8~GF_recep_IV			1
PF00010_PF13426_PF14598	HLH~PAS_9~PAS_11				1
PF00057_PF12662_PF00058	Ldl_recept_a~cEGF~Ldl_recept_b				1
PF00059_PF00008_PF07645	Lectin_C~EGF~EGF_CA				1
PF00084_PF00008_PF12662	Sushi~EGF~cEGF				1
PF00169_PF00620_PF00788	PH~RhoGAP~RA				1
PF00237_PF00788_PF16517	Ribosomal_L22~RA~Nore1-SARAH				1
PF00515_PF13424_PF13414	TPR_1~TPR_12~TPR_11				1
PF00621_PF03114_PF14604	RhoGEF~BAR~SH3_9				1
PF01352_PF00096_PF13853	KRAB~zf-C2H2~7tm_4				1
PF02023_PF13843_PF04589	SCAN~DDE_Tnp_1_7~RFX1_trans_act				1
PF02204_PF12796_PF13857	VPS9~Ank_2~Ank_5				1
PF03453_PF00994_PF03454	MoeA_N~MoCF_biosynth~MoeA_C				1
PF07645_PF12947_PF00629	EGF_CA~EGF_3~MAM				1
PF07679_PF13927_PF13895	I-set~Ig_3~Ig_2				1
PF08163_PF02259_PF02260	NUC194~FAT~FATC				1
PF11235_PF11232_PF11244	Med25_SD1~Med25~Med25_NR-box				1
PF13452_PF01575_PF02036	MaoC_dehydrat_N~MaoC_dehydratas~SCP2				1
PF14513_PF13499_PF00130	DAG_kinase_N~EF-hand_7~C1_1				1
PF15735_PF00136_PF14260	DUF4683~DNA_pol_B~zf-C4pol				1
PF16663_PF00397_PF00595	MAGI_u1~WW~PDZ				1
PF01352_PF00096_PF02023	KRAB~zf-C2H2~SCAN					2
PF00008_PF07645_PF02210	EGF~EGF_CA~Laminin_G_2					1
PF00063_PF00784_PF07653	Myosin_head~MyTH4~SH3_2					1
PF00130_PF00621_PF00169	C1_1~RhoGEF~PH					1
PF00171_PF00076_PF11627	Aldedh~RRM_1~HnRNPA1					1
PF00206_PF00627_PF09280	Lyase_1~UBA~XPC-binding					1
PF00240_PF00628_PF02182	ubiquitin~PHD~SAD_SRA					1
PF00413_PF00045_PF01253	Peptidase_M10~Hemopexin~SUI1					1
PF00428_PF00056_PF02866	Ribosomal_60s~Ldh_1_N~Ldh_1_C					1
PF00520_PF03493_PF00428	Ion_trans~BK_channel_a~Ribosomal_60s					1
PF00628_PF00855_PF00856	PHD~PWWP~SET					1
PF00787_PF14604_PF00018	PX~SH3_9~SH3_1					1
PF00999_PF00027_PF15666	Na_H_Exchanger~cNMP_binding~HGAL					1
PF01149_PF06831_PF06839	Fapy_DNA_glyco~H2TH~zf-GRF					1
PF01462_PF12799_PF13855	LRRNT~LRR_4~LRR_8					1
PF01907_PF00076_PF12196	Ribosomal_L37e~RRM_1~hNIFK_binding					1
PF02204_PF00023_PF12796	VPS9~Ank~Ank_2					1
PF03489_PF05184_PF02199	SapB_2~SapB_1~SapA					1
PF04434_PF00569_PF13639	SWIM~ZZ~zf-RING_2					1
PF04636_PF00117_PF00958	PA26~GATase~GMP_synt_C					1
PF04969_PF00970_PF00175	CS~FAD_binding_6~NAD_binding_1					1
PF05790_PF09191_PF12104	C2-set~CD4-extracel~Tcell_CD4_C					1
PF07645_PF00683_PF12662	EGF_CA~TB~cEGF					1
PF08071_PF00900_PF00467	RS4NT~Ribosomal_S4e~KOW					1
PF08205_PF13765_PF00622	C2-set_2~PRY~SPRY					1
PF08477_PF16095_PF07714	Roc~COR~Pkinase_Tyr					1
PF12417_PF01352_PF13465	DUF3669~KRAB~zf-H2C2_2					1
PF12796_PF13606_PF07525	Ank_2~Ank_3~SOCS_box					1
PF12796_PF13637_PF00514	Ank_2~Ank_4~Arm					1
PF13432_PF13181_PF11701	TPR_16~TPR_8~UNC45-central					1
PF13637_PF12796_PF00520	Ank_4~Ank_2~Ion_trans					1
PF13637_PF12796_PF01753	Ank_4~Ank_2~zf-MYND					1
PF13923_PF07653_PF14604	zf-C3HC4_2~SH3_2~SH3_9					1
PF14658_PF14662_PF05781	EF-hand_9~KASH_CCD~MRVI1					1
PF16534_PF16557_PF02376	ULD~CUTL~CUT					1
PF16906_PF00467_PF00568	Ribosomal_L26~KOW~WH1					1
PF00621_PF00618_PF00617	RhoGEF~RasGEF_N~RasGEF						2
PF00009_PF03144_PF14492	GTP_EFTU~GTP_EFTU_D2~EFG_II						1
PF00028_PF00008_PF07645	Cadherin~EGF~EGF_CA						1
PF00039_PF00051_PF00089	fn1~Kringle~Trypsin						1
PF00046_PF15965_PF15966	Homeobox~zf-TRAF_2~F-box_4						1
PF00089_PF00431_PF02937	Trypsin~CUB~COX6C						1
PF00095_PF07679_PF00014	WAP~I-set~Kunitz_BPTI						1
PF00122_PF00702_PF00689	E1-E2_ATPase~Hydrolase~Cation_ATPase_C						1
PF00125_PF02755_PF02037	Histone~RPEL~SAP						1
PF00168_PF00616_PF00779	C2~RasGAP~BTK						1
PF00373_PF09380_PF00102	FERM_M~FERM_C~Y_phosphatase						1
PF00385_PF12796_PF13606	Chromo~Ank_2~Ank_3						1
PF00413_PF01549_PF13895	Peptidase_M10~ShK~Ig_2						1
PF00501_PF13193_PF13360	AMP-binding~AMP-binding_C~PQQ_2						1
PF00610_PF00027_PF00618	DEP~cNMP_binding~RasGEF_N						1
PF00621_PF01363_PF00169	RhoGEF~FYVE~PH						1
PF00643_PF00041_PF00622	zf-B_box~fn3~SPRY						1
PF00646_PF14252_PF00621	F-box~DUF4347~RhoGEF						1
PF00690_PF13246_PF00689	Cation_ATPase_N~Cation_ATPase~Cation_ATPase_C						1
PF00787_PF07653_PF00564	PX~SH3_2~PB1						1
PF01031_PF00169_PF02212	Dynamin_M~PH~GED						1
PF01259_PF17004_PF08492	SAICAR_synt~SRP_TPR_like~SRP72						1
PF01390_PF16897_PF00089	SEA~MMR_HSR1_Xtn~Trypsin						1
PF02259_PF00454_PF02260	FAT~PI3_PI4_kinase~FATC						1
PF02758_PF00643_PF00622	PYRIN~zf-B_box~SPRY						1
PF03731_PF02735_PF08785	Ku_N~Ku~Ku_PK_bind						1
PF04558_PF04557_PF00749	tRNA_synt_1c_R1~tRNA_synt_1c_R2~tRNA-synt_1c						1
PF05053_PF07714_PF00780	Menin~Pkinase_Tyr~CNH						1
PF05224_PF13887_PF13888	NDT80_PhoG~MRF_C1~MRF_C2						1
PF06424_PF14559_PF13428	PRP1_N~TPR_19~TPR_14						1
PF06650_PF16909_PF09333	SHR-BD~VPS13_C~ATG_C						1
PF07648_PF00057_PF00089	Kazal_2~Ldl_recept_a~Trypsin						1
PF07653_PF00784_PF00373	SH3_2~MyTH4~FERM_M						1
PF07686_PF00530_PF00002	V-set~SRCR~7tm_2						1
PF07686_PF00622_PF13765	V-set~SPRY~PRY						1
PF07714_PF13637_PF12796	Pkinase_Tyr~Ank_4~Ank_2						1
PF07959_PF13637_PF07714	Fucokinase~Ank_4~Pkinase_Tyr						1
PF07974_PF05593_PF15636	EGF_2~RHS_repeat~Tox-GHH						1
PF08071_PF01479_PF00900	RS4NT~S4~Ribosomal_S4e						1
PF08487_PF13519_PF06668	VIT~VWA_2~ITI_HC_C						1
PF10495_PF06464_PF00501	PACT_coil_coil~DMAP_binding~AMP-binding						1
PF11935_PF12295_PF04712	DUF3453~Symplekin_C~Radial_spoke						1
PF12148_PF00628_PF02182	TTD~PHD~SAD_SRA						1
PF12485_PF07653_PF00536	SLY~SH3_2~SAM_1						1
PF12567_PF00041_PF00102	CD45~fn3~Y_phosphatase						1
PF12624_PF16908_PF16910	Chorein_N~VPS13~VPS13_mid_rpt						1
PF12662_PF14670_PF07645	cEGF~FXa_inhibition~EGF_CA						1
PF12783_PF01369_PF09324	Sec7_N~Sec7~DUF1981						1
PF13287_PF12773_PF12796	Fn3_assoc~DZR~Ank_2						1
PF13385_PF00066_PF05572	Laminin_G_3~Notch~Peptidase_M43						1
PF13920_PF00643_PF00622	zf-C3HC4_3~zf-B_box~SPRY						1
PF14910_PF13499_PF14911	MMS22L_N~EF-hand_7~MMS22L_C						1
PF15160_PF13921_PF11831	SASRP1~Myb_DNA-bind_6~Myb_Cef						1
PF15494_PF00089_PF01280	SRCR_2~Trypsin~Ribosomal_L19e						1
PF16209_PF00122_PF00702	PhoLip_ATPase_N~E1-E2_ATPase~Hydrolase						1
PF00638_PF16704_PF01465	Ran_BP1~Rab_bind~GRIP							6
PF13857_PF12796_PF00022	Ank_5~Ank_2~Actin							2
PF00023_PF12796_PF07647	Ank~Ank_2~SAM_2							1
PF00043_PF09334_PF00458	GST_C~tRNA-synt_1g~WHEP-TRS							1
PF00096_PF13912_PF16622	zf-C2H2~zf-C2H2_6~zf-C2H2_11							1
PF00289_PF02786_PF02785	Biotin_carb_N~CPSase_L_D2~Biotin_carb_C							1
PF00536_PF10534_PF00169	SAM_1~CRIC_ras_sig~PH							1
PF00564_PF00130_PF00069	PB1~C1_1~Pkinase							1
PF00621_PF00169_PF00018	RhoGEF~PH~SH3_1							1
PF00621_PF07653_PF00018	RhoGEF~SH3_2~SH3_1							1
PF00644_PF08487_PF00092	PARP~VIT~VWA							1
PF01321_PF16189_PF00557	Creatinase_N~Creatinase_N_2~Peptidase_M24							1
PF01336_PF16900_PF08646	tRNA_anti-codon~REPA_OB_2~Rep_fac-A_C							1
PF01562_PF01421_PF00090	Pep_M12B_propep~Reprolysin~TSP_1							1
PF02180_PF00452_PF00076	BH4~Bcl-2~RRM_1							1
PF02493_PF12796_PF01753	MORN~Ank_2~zf-MYND							1
PF02793_PF01825_PF00002	HRM~GPS~7tm_2							1
PF03172_PF01342_PF00628	HSR~SAND~PHD							1
PF03828_PF16631_PF00098	PAP_assoc~TUTF7_u4~zf-CCHC							1
PF05033_PF00856_PF01359	Pre-SET~SET~Transposase_1							1
PF07973_PF00587_PF03129	tRNA_SAD~tRNA-synt_2b~HGTP_anticodon							1
PF09004_PF13532_PF08241	DUF1891~2OG-FeII_Oxy_2~Methyltransf_11							1
PF12075_PF00023_PF13857	KN_motif~Ank~Ank_5							1
PF12947_PF07645_PF00100	EGF_3~EGF_CA~Zona_pellucida							1
PF13418_PF07646_PF13964	Kelch_4~Kelch_2~Kelch_6							1
PF14555_PF02338_PF01754	UBA_4~OTU~zf-A20							1
PF14716_PF10391_PF14792	HHH_8~DNA_pol_lambd_f~DNA_pol_B_palm							1
PF00075_PF16721_PF00665	RNase_H~zf-H3C2~rve								11
PF00057_PF07645_PF00058	Ldl_recept_a~EGF_CA~Ldl_recept_b								1
PF00069_PF10409_PF00226	Pkinase~PTEN_C2~DnaJ								1
PF00095_PF07645_PF00100	WAP~EGF_CA~Zona_pellucida								1
PF01017_PF02864_PF00017	STAT_alpha~STAT_bind~SH2								1
PF01344_PF13964_PF13418	Kelch_1~Kelch_6~Kelch_4								1
PF01825_PF01477_PF08016	GPS~PLAT~PKD_channel								1
PF07496_PF00855_PF00076	zf-CW~PWWP~RRM_1								1
PF12075_PF13637_PF13857	KN_motif~Ank_4~Ank_5								1
PF12796_PF00023_PF07525	Ank_2~Ank~SOCS_box								1
PF12874_PF00076_PF03828	zf-met~RRM_1~PAP_assoc								1
PF13385_PF01391_PF01410	Laminin_G_3~Collagen~COLFI								1
PF13414_PF00515_PF13424	TPR_11~TPR_1~TPR_12								1
PF13606_PF12796_PF13857	Ank_3~Ank_2~Ank_5								1
PF13637_PF00023_PF12796	Ank_4~Ank~Ank_2								1
PF13854_PF13418_PF07646	Kelch_5~Kelch_4~Kelch_2								1
PF13895_PF07679_PF01582	Ig_2~I-set~TIR								1
PF02023_PF13465_PF00096	SCAN~zf-H2C2_2~zf-C2H2									2
PF14492_PF03764_PF00679	EFG_II~EFG_IV~EFG_C									2
PF00028_PF16492_PF08266	Cadherin~Cadherin_C_2~Cadherin_2									1
PF00047_PF13895_PF13927	ig~Ig_2~Ig_3									1
PF00047_PF13927_PF01582	ig~Ig_3~TIR									1
PF00047_PF13927_PF07679	ig~Ig_3~I-set									1
PF00092_PF12662_PF10393	VWA~cEGF~Matrilin_ccoil									1
PF00307_PF00435_PF00169	CH~Spectrin~PH									1
PF00415_PF13540_PF00632	RCC1~RCC1_2~HECT									1
PF00431_PF00530_PF00100	CUB~SRCR~Zona_pellucida									1
PF00431_PF07645_PF00084	CUB~EGF_CA~Sushi									1
PF00646_PF13229_PF05048	F-box~Beta_helix~NosD									1
PF00651_PF07707_PF13415	BTB~BACK~Kelch_3									1
PF01237_PF04683_PF16550	Oxysterol_BP~Proteasom_Rpn13~RPN13_C									1
PF01352_PF00096_PF12171	KRAB~zf-C2H2~zf-C2H2_jaz									1
PF02177_PF12924_PF00014	APP_N~APP_Cu_bd~Kunitz_BPTI									1
PF02820_PF01530_PF00069	MBT~zf-C2HC~Pkinase									1
PF05831_PF02170_PF02171	GAGE~PAZ~Piwi									1
PF06602_PF12796_PF07525	Myotub-related~Ank_2~SOCS_box									1
PF11365_PF14818_PF08202	SOGA~DUF4482~MIS13									1
PF13414_PF13424_PF00515	TPR_11~TPR_12~TPR_1									1
PF13855_PF12369_PF00001	LRR_8~GnHR_trans~7tm_1									1
PF13873_PF00176_PF00271	Myb_DNA-bind_5~SNF2_N~Helicase_C									1
PF13927_PF00047_PF07679	Ig_3~ig~I-set									1
PF16484_PF00755_PF15191	CPT_N~Carn_acyltransf~Synaptonemal_3									1
PF00097_PF07653_PF14604	zf-C3HC4~SH3_2~SH3_9										1
PF00362_PF07974_PF08725	Integrin_beta~EGF_2~Integrin_b_cyt										1
PF00515_PF04969_PF05002	TPR_1~CS~SGS										1
PF00554_PF16179_PF12796	RHD_DNA_bind~RHD_dimer~Ank_2										1
PF00611_PF00620_PF14604	FCH~RhoGAP~SH3_9										1
PF02188_PF03792_PF00046	GoLoco~PBC~Homeobox										1
PF07686_PF07654_PF00047	V-set~C1-set~ig										1
PF07686_PF13927_PF00047	V-set~Ig_3~ig										3
PF08742_PF01826_PF00094	C8~TIL~VWD										1
PF09607_PF03221_PF03184	BrkDBD~HTH_Tnp_Tc5~DDE_1										1
PF12440_PF01454_PF00447	MAGE_N~MAGE~HSF_DNA-bind										1
PF12440_PF01454_PF02389	MAGE_N~MAGE~Cornifin										2
PF12796_PF13637_PF00520	Ank_2~Ank_4~Ion_trans										2
PF14559_PF13414_PF13181	TPR_19~TPR_11~TPR_8										1
PF14670_PF07645_PF07974	FXa_inhibition~EGF_CA~EGF_2										1
PF15742_PF04494_PF00400	DUF4686~TFIID_NTD2~WD40										1
PF17205_PF00362_PF07974	PSI_integrin~Integrin_beta~EGF_2							1	1	1	1
PF03810_PF02985_PF13513	IBN_N~HEAT~HEAT_EZ	1	1	1	1	1	1
PF01094_PF07562_PF00003	ANF_receptor~NCD3G~7tm_3	14	13	13	11	11	21	11	135	17	10
PF08266_PF00028_PF15974	Cadherin_2~Cadherin~Cadherin_tail	1					1	12	16
PF08266_PF00028_PF16492	Cadherin_2~Cadherin~Cadherin_C_2	25	31	31	34	28	27	17	23	21	17
PF01352_PF00096_PF13912	KRAB~zf-C2H2~zf-C2H2_6	19	20	17	12	10	18	18	26	19	7
PF02023_PF01352_PF00096	SCAN~KRAB~zf-C2H2	18	20	19	15	29	14	18	11	16	16
PF01352_PF00096_PF16622	KRAB~zf-C2H2~zf-C2H2_11	1	1	1	1	2	1	2	11		1
PF07686_PF13927_PF13895	V-set~Ig_3~Ig_2	1	2	1	1	1		10	1	4
PF01352_PF00096_PF13465	KRAB~zf-C2H2~zf-H2C2_2	7	8	4	4	2	3	6	11	6	1
PF00129_PF07654_PF06623	MHC_I~C1-set~MHC_I_C	6	4	3	4	1	1	4	2	11	5
PF01352_PF13912_PF00096	KRAB~zf-C2H2_6~zf-C2H2	3	5	2	3	1		2	9	6	1
PF07686_PF13765_PF00622	V-set~PRY~SPRY	4	4	7	8	4	1	8	3	8	3
PF00651_PF07707_PF01344	BTB~BACK~Kelch_1	36	40	41	40	40	38	45	40	41	39
PF01773_PF07670_PF07662	Nucleos_tra2_N~Gate~Nucleos_tra2_C	3	3	3	3	3	2	3	4	10	3
PF15227_PF00643_PF00622	zf-C3HC4_4~zf-B_box~SPRY	3	2	1		2	2	8	4	4	6
PF07645_PF01825_PF00002	EGF_CA~GPS~7tm_2	4	4	4	3	4	3	2	2	8	8
PF15227_PF13765_PF00622	zf-C3HC4_4~PRY~SPRY	7	8	4	4	4	2	2	4	4	2
PF01562_PF00200_PF08516	Pep_M12B_propep~Disintegrin~ADAM_CR	1		1	1	1	5
PF07679_PF13927_PF00041	I-set~Ig_3~fn3	6	9	10	9	9	8	9	9	12	6
PF04218_PF03221_PF03184	CENP-B_N~HTH_Tnp_Tc5~DDE_1	7	10	7	8	9	9	8	5	11	9
PF13445_PF00643_PF00622	zf-RING_UBOX~zf-B_box~SPRY	2	3	4	4	2	3	4	5	6	7
PF02758_PF05729_PF13516	PYRIN~NACHT~LRR_6	2	3	1	2	1		5	5	2	1
PF01391_PF09006_PF00059	Collagen~Surfac_D-trimer~Lectin_C	1	1	1	1	1	1	1	1	1	6
PF01074_PF09261_PF07748	Glyco_hydro_38~Alpha-mann_mid~Glyco_hydro_38C	3	6	6	6	6	4	5	5	5	9
PF00009_PF03144_PF03143	GTP_EFTU~GTP_EFTU_D2~GTP_EFTU_D3	8	6	4	4	5	4	3	3	4	3
PF02736_PF00063_PF01576	Myosin_N~Myosin_head~Myosin_tail_1	12	11	14	11	9	12	13	13	12	13
PF13912_PF00096_PF13465	zf-C2H2_6~zf-C2H2~zf-H2C2_2					1			3
PF02093_PF00077_PF00078	Gag_p30~RVP~RVT_1	1		3
PF15779_PF13855_PF14914	LRRC37~LRR_8~LRRC37AB_C	4	1			2		4	2	1	1
PF01352_PF13465_PF00096	KRAB~zf-H2C2_2~zf-C2H2	4	1	1	2	2	3		4	1
PF13855_PF13927_PF07679	LRR_8~Ig_3~I-set	4	4	2	2	5	1	3	2	3	3
PF12796_PF14915_PF12001	Ank_2~CCDC144C~DUF3496	1	1		1		1	3	1	1	4
PF01421_PF00200_PF08516	Reprolysin~Disintegrin~ADAM_CR	2		2	1		4			3	1
PF02727_PF02728_PF01179	Cu_amine_oxidN2~Cu_amine_oxidN3~Cu_amine_oxid	4	4	3	3	3	2	3	6	4	5
PF01094_PF10613_PF00060	ANF_receptor~Lig_chan-Glu_bd~Lig_chan	12	11	11	13	14	10	11	12	12	11
PF01094_PF07714_PF00211	ANF_receptor~Pkinase_Tyr~Guanylate_cyc	5	5	6	6	6	3	4	7	5	5
PF01471_PF00413_PF00045	PG_binding_1~Peptidase_M10~Hemopexin	12	11	10	11	11	12	13	14	12	12
PF16209_PF13246_PF16212	PhoLip_ATPase_N~Cation_ATPase~PhoLip_ATPase_C	2	4	3		1	4	3	2	1	2
PF00307_PF00412_PF12130	CH~LIM~DUF3585	2	2	2	4	4	2	4	3	3	5
PF07686_PF08205_PF13927	V-set~C2-set_2~Ig_3	6	5	7	4	5	3	5	4	5	5
PF16880_PF00350_PF12763	EHD_N~Dynamin_N~EF-hand_4	1	4	4	4	4	2	4	4	4	4
PF00088_PF16863_PF01055	Trefoil~NtCtMGAM_N~Glyco_hydro_31	2	1	4	1	3	3	3	1	2	3
PF08487_PF00092_PF06668	VIT~VWA~ITI_HC_C	3	5	4	5	5	3	6	6	5	5
PF00168_PF00397_PF00632	C2~WW~HECT	5	5	3	3	3	4	5	6	4	5
PF00092_PF01839_PF08441	VWA~FG-GAP~Integrin_alpha2	5	5	5	7	6	4	6	7	7	6
PF04704_PF13909_PF00096	Zfx_Zfy_act~zf-H2C2_5~zf-C2H2	1	1	1	1	1		1	1	4	1
PF00651_PF01344_PF13964	BTB~Kelch_1~Kelch_6	1							1	3	1
PF00010_PF00989_PF14598	HLH~PAS~PAS_11	2	2	3	3	3	2	3	5	4	4
PF00094_PF08742_PF01826	VWD~C8~TIL	4	2	3	1	1	1	1	2	2	2
PF13927_PF07679_PF00041	Ig_3~I-set~fn3	12	12	10	11	11	10	11	11	10	13
PF00018_PF00017_PF07714	SH3_1~SH2~Pkinase_Tyr	12	13	10	13	11	12	13	12	12	11
PF08412_PF00520_PF00027	Ion_trans_N~Ion_trans~cNMP_binding	3	4	4	4	3	1	4	4	4	4
PF00350_PF01031_PF02212	Dynamin_N~Dynamin_M~GED	4	1	3	3	2	3	3	1	3	3
PF00595_PF15936_PF00412	PDZ~DUF4749~LIM	5	5	4	5	5	2	5	5	5	5
PF14551_PF17207_PF00493	MCM_N~MCM_OB~MCM	5	5	4	5	5	2	5	5	5	5
PF00621_PF00169_PF01363	RhoGEF~PH~FYVE	6	6	5	6	5	3	6	6	6	6
PF16422_PF01833_PF16423	COE1_DBD~TIG~COE1_HLH	3	3	3	4	3	1	4	4	4	4
PF13927_PF07679_PF07714	Ig_3~I-set~Pkinase_Tyr	3	4	4	3	3	4	2	5	2	3
PF02771_PF02770_PF00441	Acyl-CoA_dh_N~Acyl-CoA_dh_M~Acyl-CoA_dh_1	9	8	8	7	9	9	9	10	8	10
PF07700_PF07701_PF00211	HNOB~HNOBA~Guanylate_cyc	4	1	4	3	3	2	3	3	4	3
PF00219_PF00093_PF00007	IGFBP~VWC~Cys_knot	3	3	2	3	3	5	2	2	2	3
PF15705_PF16070_PF15706	TMEM132D_N~TMEM132~TMEM132D_C	3	3	5	5	4	3	5	5	4	5
PF13855_PF12799_PF01582	LRR_8~LRR_4~TIR	1		1			1		3		1
PF00240_PF00627_PF09280	ubiquitin~UBA~XPC-binding	1	2	2	2	3	2	1	2	4	2
PF02199_PF05184_PF03489	SapA~SapB_1~SapB_2	2	2	2	1	1	1	3	3	3	3
PF11878_PF14429_PF06920	DUF3398~DOCK-C2~DHR-2	3	3	1	3	2	1	3	3	3	3
PF07974_PF00041_PF00147	EGF_2~fn3~Fibrinogen_C	1	2	1	2	1	1	3	1	1	3
PF10581_PF02078_PF02750	Synapsin_N~Synapsin~Synapsin_C	1	3	1	2	3	2	3	3	3	3
PF09162_PF02136_PF03943	Tap-RNA_bind~NTF2~TAP_C	1	3	2	3	2	3	3	4	3	2
PF13426_PF00520_PF00027	PAS_9~Ion_trans~cNMP_binding	5	6	5	4	6	6	6	7	6	5
PF00092_PF14670_PF10393	VWA~FXa_inhibition~Matrilin_ccoil	2	2	4	2	3	2	3	2	1	2
PF10513_PF13831_PF13832	EPL1~PHD_2~zf-HC5HC2H_2	2	3	2	3	1	1	3	3	3	2
PF00683_PF07645_PF12662	TB~EGF_CA~cEGF	3	2	2	1	3	2	4	2	2	2
PF01033_PF01663_PF01223	Somatomedin_B~Phosphodiest~Endonuclease_NS	3	3	2	3	1	1	3	2	2	3
PF12417_PF01352_PF00096	DUF3669~KRAB~zf-C2H2	4	4	5	5	4	5	6	5	6	6
PF05986_PF00090_PF08686	ADAM_spacer1~TSP_1~PLAC	2	2	2	2	3	1	3	3	3	1
PF00643_PF13765_PF00622	zf-B_box~PRY~SPRY	3	2	1	3	3	3	3	3	4	3
PF00071_PF01412_PF12796	Ras~ArfGap~Ank_2	1	1	3	3	2	1	2	2	2	2
PF00063_PF00612_PF01843	Myosin_head~IQ~DIL	2	1	3	1	2	2	3	2	3	2
PF15227_PF00643_PF13765	zf-C3HC4_4~zf-B_box~PRY	2	1		2	3	1		1	2	1
PF00125_PF16211_PF01661	Histone~Histone_H2A_C~Macro	2	2	2	2	4	1	2	2	2	2
PF02878_PF02879_PF02880	PGM_PMM_I~PGM_PMM_II~PGM_PMM_III	2	2	3	3	4	2	3	4	3	3
PF01390_PF00057_PF00089	SEA~Ldl_recept_a~Trypsin	2	2	3		1	2	3	3	3
PF02225_PF04389_PF04253	PA~Peptidase_M28~TFR_dimer	3	3	3	3	3	1	3	3	4	3
PF13855_PF07679_PF00041	LRR_8~I-set~fn3	4	5	5	4	4	5	6	5	6	5
PF00868_PF01841_PF00927	Transglut_N~Transglut_core~Transglut_C	1		3	1	1	2	2	1	1	2
PF16172_PF14429_PF06920	DOCK_N~DOCK-C2~DHR-2	3	2	4	2	3	2	2		2	2
PF12796_PF00023_PF13637	Ank_2~Ank~Ank_4	1	1	1	3		1	1	1	2	1
PF00621_PF00169_PF14604	RhoGEF~PH~SH3_9	1	1	2	2	1	3	1	1	1	2
PF16208_PF00038_PF16210	Keratin_2_head~Filament~Keratin_2_tail	1		1	1	1		1	1	3	1
PF08526_PF08527_PF03068	PAD_N~PAD_M~PAD	5	5	3	4	4	4	5	5	5	5
PF00008_PF12661_PF02210	EGF~hEGF~Laminin_G_2		1					2
PF14604_PF00017_PF07714	SH3_9~SH2~Pkinase_Tyr			2	1	1	2	1	2	2	3
PF05729_PF13553_PF00619	NACHT~FIIND~CARD								2		1
PF07686_PF01825_PF00002	V-set~GPS~7tm_2	3	2
PF01562_PF01421_PF08516	Pep_M12B_propep~Reprolysin~ADAM_CR			2			1
PF13923_PF13765_PF00622	zf-C3HC4_2~PRY~SPRY					1	2
PF02854_PF02847_PF02020	MIF4G~MA3~W2	1	2	3	3	2	3	3	3	3	3
PF00610_PF00631_PF00615	DEP~G-gamma~RGS	2	3	3	3	4	4	4	4	4	3
PF09379_PF00373_PF09380	FERM_N~FERM_M~FERM_C	3	1	1	1	1	1	2	1	2	1
PF00055_PF00053_PF01759	Laminin_N~Laminin_EGF~NTR	3	2	2	3	3	1	3	3	3	3
PF00456_PF02779_PF02780	Transketolase_N~Transket_pyr~Transketolase_C	3	3	2	2	2	1	3	2	3	3
PF08953_PF00400_PF16300	DUF1899~WD40~WD40_4	4	4	4	5	4	3	5	5	5	5
PF01749_PF00514_PF16186	IBB~Arm~Arm_3	6	6	7	7	6	5	7	6	7	7
PF03456_PF02141_PF03455	uDENN~DENN~dDENN	8	9	10	9	9	10	10	10	9	10
PF05066_PF13919_PF13922	HARE-HTH~ASXH~PHD_3	1	2	1	2	2	3	2	3	2	2
PF00059_PF00008_PF00084	Lectin_C~EGF~Sushi	1	3	2	2	2	2	1	2	1	1
PF00271_PF04408_PF07717	Helicase_C~HA2~OB_NTP_bind	2	3	1	2	3	1	2	2	2	2
PF08711_PF07500_PF01096	Med26~TFIIS_M~TFIIS_C	2	3	3	4	4	3	3	3	2	3
PF00018_PF00621_PF00169	SH3_1~RhoGEF~PH	3	3	2	2	2	2	3	3	4	3
PF00648_PF01067_PF13833	Peptidase_C2~Calpain_III~EF-hand_8	3	4	3	2	3	3	4	3	2	3
PF01030_PF00757_PF07714	Recep_L_domain~Furin-like~Pkinase_Tyr	3		3	2	1	2	3	2	2	2
PF00069_PF00627_PF02149	Pkinase~UBA~KA1	4	4	4	4	4	2	4	4	4	3
PF02010_PF01477_PF08016	REJ~PLAT~PKD_channel		1	1	1	1	1	1	1	1	3
PF00130_PF00781_PF00609	C1_1~DAGK_cat~DAGK_acc	2	2	2	3			1	1	2	2
PF02881_PF00448_PF02978	SRP54_N~SRP54~SRP_SPB	1	1	1	1	1	1	1	3	1	1
PF13445_PF00643_PF00025	zf-RING_UBOX~zf-B_box~Arf	1	1	1	1	1	1	1	1	3	1
PF00092_PF01391_PF00014	VWA~Collagen~Kunitz_BPTI	1	1	2	1	2	2	2	2	3	2
PF00013_PF00270_PF00271	KH_1~DEAD~Helicase_C	2	2	2	2	1	1	2	1	3	2
PF00438_PF02772_PF02773	S-AdoMet_synt_N~S-AdoMet_synt_M~S-AdoMet_synt_C	2	2	2	2	2	4	2	2	2	2
PF00817_PF11798_PF11799	IMS~IMS_HHH~IMS_C	2	2	2	2	3	2	1	1	2	1
PF00611_PF00620_PF00018	FCH~RhoGAP~SH3_1	3	2	2	3	3	3	4	3	3	2
PF01794_PF08022_PF08030	Ferric_reduct~FAD_binding_8~NAD_binding_6	3	3	3	3	3	2	4	3	4	4
PF08266_PF00028_PF08374	Cadherin_2~Cadherin~Protocadherin	3	4	4	4	3	3	5	4	4	4
PF01064_PF08515_PF00069	Activin_recp~TGF_beta_GS~Pkinase	2	3	3	3	2		3	3	3	4
PF13540_PF00415_PF00632	RCC1_2~RCC1~HECT	1					2	1
PF00219_PF07648_PF13365	IGFBP~Kazal_2~Trypsin_2	1						2			1
PF12796_PF13637_PF00023	Ank_2~Ank_4~Ank	1						2			1
PF01352_PF09514_PF00096	KRAB~SSXRD~zf-C2H2				1			1			2
PF00097_PF13765_PF00622	zf-C3HC4~PRY~SPRY				2					1	1
PF08071_PF00900_PF16121	RS4NT~Ribosomal_S4e~40S_S4_C	1			1	2
PF00643_PF00628_PF00439	zf-B_box~PHD~Bromodomain	2	3	1	1	2	2	2	2	2	2
PF03700_PF00787_PF09325	Sorting_nexin~PX~Vps5	2	3	2	1	2	1	2	2	2	2
PF11971_PF17095_PF08683	CAMSAP_CH~CAMSAP_CC1~CAMSAP_CKK	2	3	3	3	3	2	3	3	4	3
PF02023_PF13837_PF00096	SCAN~Myb_DNA-bind_4~zf-C2H2	3	3	3	3	2	3	4	3	4	3
PF15951_PF00010_PF11851	MITF_TFEB_C_3_N~HLH~DUF3371	4	3	3	3	3	2	3	3	4	3
PF00270_PF00271_PF13959	DEAD~Helicase_C~DUF4217	4	4	3	3	4	4	4	4	5	4
PF01421_PF00090_PF05986	Reprolysin~TSP_1~ADAM_spacer1	2		1	1		2			2
PF00754_PF02210_PF00008	F5_F8_type_C~Laminin_G_2~EGF	1	1	2	2		1			2	1
PF02469_PF12947_PF00193	Fasciclin~EGF_3~Xlink	1	2		1	1	2	1	2	1	2
PF00057_PF01823_PF00090	Ldl_recept_a~MACPF~TSP_1	1		1	2	2	1	1	2		2
PF00057_PF15494_PF00089	Ldl_recept_a~SRCR_2~Trypsin	2	1	1	2	1	2	1	2	2	1
PF07679_PF00041_PF00102	I-set~fn3~Y_phosphatase	2	1	2	2	2	1	1	2	1	1
PF10427_PF12938_PF16608	Ago_hook~M_domain~TNRC6-PABC_bdg	2	1		2		1	1	1	2	2
PF14948_PF11548_PF00102	RESP18~Receptor_IA-2~Y_phosphatase	2	2	2	1	2	2	1	1	1	1
PF00790_PF03127_PF02883	VHS~GAT~Alpha_adaptinC2	3	2	2	3	2	2	3	3	3	2
PF01429_PF16564_PF14048	MBD~MBDa~MBD_C	1	1	1	1	1	1	2	2	2	2
PF13589_PF01119_PF08676	HATPase_c_3~DNA_mis_repair~MutL_C	1	2	1	1	1	1	2	1	2	2
PF07651_PF16515_PF01608	ANTH~HIP1_clath_bdg~I_LWEQ	1	2	1	2	1	1	2	2	2	2
PF13330_PF00090_PF13927	Mucin2_WxxW~TSP_1~Ig_3	1	2	1	2	2	2	1	1	1	1
PF00439_PF17035_PF17105	Bromodomain~BET~BRD4_CDT	1	2	2	2	1	1	2	2	2	1
PF00130_PF00788_PF16517	C1_1~RA~Nore1-SARAH	1		2	1	2		1	2	1	1
PF07647_PF00620_PF01852	SAM_2~RhoGAP~START	2	1	1	2	1	1	2	1	2	1
PF00640_PF11830_PF00566	PID~DUF3350~RabGAP-TBC	2	2	1	1	2	1	1	2	2	2
PF07679_PF08205_PF13927	I-set~C2-set_2~Ig_3	2	2	2	2	3	2	3	3	3	2
PF00412_PF16182_PF02209	LIM~AbLIM_anchor~VHP	2	2	2	3	3	2	3	3	3	3
PF00754_PF00246_PF13620	F5_F8_type_C~Peptidase_M14~CarboxypepD_reg	2	2	3	3	2	2	3	3	3	3
PF08916_PF00169_PF00017	Phe_ZIP~PH~SH2	2	3	3	3	3	2	2	2	2	2
PF06480_PF00004_PF01434	FtsH_ext~AAA~Peptidase_M41	3	2	2	3	2	2	2	3	2	3
PF16274_PF00013_PF16568	Qua1~KH_1~Sam68-YY	3	2	2	3	3	2	2	3	3	3
PF06337_PF14836_PF00443	DUSP~Ubiquitin_3~UCH	3	3	2	2	2	2	3	3	3	3
PF00130_PF00169_PF00069	C1_1~PH~Pkinase	3	3	3	3	2	3	2	2	3	2
PF00651_PF07707_PF08005	BTB~BACK~PHR	3	4	4	4	3	3	4	3	4	4
PF00595_PF08688_PF08687	PDZ~ASD1~ASD2		1	2	1	1	2	1	2	1
PF02770_PF00441_PF01756	Acyl-CoA_dh_M~Acyl-CoA_dh_1~ACOX		1		1			1	2	2	1
PF00219_PF07648_PF07679	IGFBP~Kazal_2~I-set			1	2			2	1	1	1
PF12796_PF13637_PF07525	Ank_2~Ank_4~SOCS_box			2	2	2		1		1	2
PF02919_PF01028_PF14370	Topoisom_I_N~Topoisom_I~Topo_C_assoc	1	1	1	1	2		1	2	1	2
PF00530_PF00431_PF00100	SRCR~CUB~Zona_pellucida	1	1	1		2	1	1	1	2	2
PF00009_PF03144_PF09173	GTP_EFTU~GTP_EFTU_D2~eIF2_C	1	1		1	1	1	2	2	2	1
PF00057_PF13855_PF00001	Ldl_recept_a~LRR_8~7tm_1	1	2	2	1		1	2	2	2	2
PF01926_PF16897_PF02824	MMR_HSR1~MMR_HSR1_Xtn~TGS	1	2	2	2	3		2	2	2	2
PF00373_PF09380_PF08736	FERM_M~FERM_C~FA	1	2			1				1
PF00010_PF00989_PF08447	HLH~PAS~PAS_3	2	2	2	2	2	1	2		1	1
PF00057_PF14670_PF00058	Ldl_recept_a~FXa_inhibition~Ldl_recept_b		2		1		1	1
PF01403_PF01437_PF00090	Sema~PSI~TSP_1			2	1			1			1
PF02758_PF14484_PF05729	PYRIN~FISNA~NACHT						1	2		1	1
PF00122_PF13246_PF00689	E1-E2_ATPase~Cation_ATPase~Cation_ATPase_C	1	1		1	2
PF00594_PF00008_PF00089	Gla~EGF~Trypsin		1	1	2	1	2	1		1
PF11404_PF02214_PF00520	Potassium_chann~BTB_2~Ion_trans	1	1	1	2	1	1	2	1	1	2
PF13927_PF07679_PF00629	Ig_3~I-set~MAM	1	1	1	2	2	2	1	1	1	1
PF00611_PF00017_PF07714	FCH~SH2~Pkinase_Tyr	1	1	2	1	2	1	1	1	2	1
PF07679_PF13927_PF07714	I-set~Ig_3~Pkinase_Tyr	1	1	2	1	2	1	1	1	1	2
PF01602_PF08752_PF16381	Adaptin_N~COP-gamma_platf~Coatomer_g_Cpla	1	2	1	2	1	2	2	2	2	2
PF00763_PF02882_PF01268	THF_DHG_CYH~THF_DHG_CYH_C~FTHFS	2	1	1	2	2	1	2	2	2	2
PF14438_PF06741_PF07145	SM-ATX~LsmAD~PAM2	2	2	1	1	1	2	2	2	2	2
PF14749_PF02770_PF01756	Acyl-CoA_ox_N~Acyl-CoA_dh_M~ACOX	2	2	1	2	2	1	2	2	2	1
PF14636_PF14637_PF14638	FNIP_N~FNIP_M~FNIP_C	2	2	2	1	1	2	2	2	2	1
PF12485_PF07653_PF07647	SLY~SH3_2~SAM_2	2	2	2	1	2	1	1	2	2	2
PF00047_PF07679_PF07714	ig~I-set~Pkinase_Tyr	2	2	2	2	2	2	1	1	1	2
PF02210_PF01391_PF01410	Laminin_G_2~Collagen~COLFI	2	2	3	2	3	2	3	2	2	2
PF10409_PF00017_PF08416	PTEN_C2~SH2~PTB	2	2	3	3	3	2	2	2	2	2
PF00041_PF00092_PF01391	fn3~VWA~Collagen	2	3	3	2	2	2	3	2	2	2
PF00270_PF00271_PF02889	DEAD~Helicase_C~Sec63	2	3	3	2	2	3	3	3	3	3
PF02037_PF00622_PF13671	SAP~SPRY~AAA_33	2	3	3	3	2	2	3	3	3	3
PF02185_PF00069_PF00433	HR1~Pkinase~Pkinase_C	3	3	3	3	2	3	2	3	2	3
PF00307_PF00435_PF15410	CH~Spectrin~PH_9	3	4	3	4	4	4	4	4	4	3
PF00618_PF00617_PF00788	RasGEF_N~RasGEF~RA	3	4	4	4	4	3	4	4	3	4
PF00307_PF00435_PF08726	CH~Spectrin~EFhand_Ca_insen	4	4	3	3	3	3	3	3	4	3
PF08758_PF00028_PF01049	Cadherin_pro~Cadherin~Cadherin_C	5	5	5	4	5	5	4	4	5	5
PF00520_PF11933_PF06512	Ion_trans~Na_trans_cytopl~Na_trans_assoc	5	6	5	6	6	5	6	6	6	6
PF07657_PF01414_PF00008	MNNL~DSL~EGF	2	2	2	2	2	1	2	2	3	2
PF16177_PF00501_PF13193	ACAS_N~AMP-binding~AMP-binding_C	3	3	3	4	3	2	3	3	3	3
PF00520_PF16905_PF08763	Ion_trans~GPHH~Ca_chan_IQ	3	4	4	4	4	4	5	4	4	4
PF00226_PF01556_PF00684	DnaJ~DnaJ_C~DnaJ_CXXCXGXG	4	4	4	4	4	3	4	4	5	4
PF00130_PF00168_PF00069	C1_1~C2~Pkinase	1	2	1	2			2	2	2	2
PF12796_PF05033_PF00856	Ank_2~Pre-SET~SET	2	1	2			1	1	1	1	1
PF00307_PF15949_PF00412	CH~DUF4757~LIM	2		1	1	1		1	1	1	2
PF00307_PF00616_PF03836	CH~RasGAP~RasGAP_C	2		2	1		1	1	1	1	1
PF00028_PF02210_PF00008	Cadherin~Laminin_G_2~EGF		1	2	1		1	2	1	1	1
PF12947_PF02469_PF00193	EGF_3~Fasciclin~Xlink	1		2		1		1		1
PF13855_PF13927_PF00041	LRR_8~Ig_3~fn3			1		2	1		1	1
PF07679_PF00041_PF06583	I-set~fn3~Neogenin_C			2	1	1		1		1
PF00122_PF13246_PF16212	E1-E2_ATPase~Cation_ATPase~PhoLip_ATPase_C	1	1	2		1	1
PF00788_PF00063_PF00620	RA~Myosin_head~RhoGAP	2	1	2	2	2	1	2		2	2
PF00219_PF07648_PF13927	IGFBP~Kazal_2~Ig_3	2	1		1	1	1	1	1	2	1
PF00595_PF09128_PF00621	PDZ~RGS-like~RhoGEF	2	1		2	2	1	2	2	2	2
PF00017_PF00130_PF00620	SH2~C1_1~RhoGAP	2	2	1	1	2		2	2	2	2
PF00919_PF04055_PF01938	UPF0004~Radical_SAM~TRAM	2	2		2	2	1	1	2	2	2
PF00431_PF03815_PF00754	CUB~LCCL~F5_F8_type_C	2		2	2	2	2	2	1	1	2
PF16134_PF11732_PF11262	THOC2_N~Thoc2~Tho2	1	1	1	1	1	1	1	2	1	2
PF16646_PF00615_PF00778	AXIN1_TNKS_BD~RGS~DIX	1	1	1	2	2	1	1	1	1	1
PF04704_PF00096_PF13909	Zfx_Zfy_act~zf-C2H2~zf-H2C2_5	1	1	2	1	1	1	2	1	1	1
PF11825_PF00105_PF00104	Nuc_recep-AF1~zf-C4~Hormone_recep	1	1	2	2	2	2	2	2	2	2
PF12409_PF00122_PF00702	P5-ATPase~E1-E2_ATPase~Hydrolase	1	2	1	2	1	1	1	1	1	1
PF00051_PF01822_PF00431	Kringle~WSC~CUB	1	2	1	2	2	2	2	2	2	2
PF00017_PF00018_PF07653	SH2~SH3_1~SH3_2	1	2	2	2	2	1	2	2	2	2
PF00250_PF16675_PF16676	Forkhead~FOXO_KIX_bdg~FOXO-TAD	1	2	2	2	2	1	2	2	2	2
PF00595_PF15410_PF00620	PDZ~PH_9~RhoGAP	1	2	2	2	2	1	2	2	2	2
PF10509_PF00288_PF08544	GalKase_gal_bdg~GHMP_kinases_N~GHMP_kinases_C	1	2	2	2	2	1	2	2	2	2
PF02798_PF00043_PF00647	GST_N~GST_C~EF1G	2	1	1	1	2	1	1	1	1	1
PF00568_PF00786_PF02205	WH1~PBD~WH2	2	1	1	2	2	2	2	2	2	2
PF04212_PF00004_PF09336	MIT~AAA~Vps4_C	2	1	1	2	2	2	2	2	2	2
PF00520_PF16519_PF02816	Ion_trans~TRPM_tetra~Alpha_kinase	2	1	2	2	1	2	2	2	2	2
PF01429_PF05033_PF00856	MBD~Pre-SET~SET	2	1	2	2	2	2	2	2	1	2
PF08321_PF00149_PF13499	PPP5~Metallophos~EF-hand_7	2	2	1	1	2	2	2	2	2	2
PF05383_PF00076_PF08777	La~RRM_1~RRM_3	2	2	1	2	1	2	2	2	2	2
PF00307_PF00435_PF10541	CH~Spectrin~KASH	2	2	1	2	2	1	2	2	2	2
PF00629_PF00041_PF00102	MAM~fn3~Y_phosphatase	2	2	1	2	2	1	2	2	2	2
PF00648_PF01067_PF00168	Peptidase_C2~Calpain_III~C2	2	2	2	2	2	1	2	1	2	2
PF02214_PF00520_PF03521	BTB_2~Ion_trans~Kv2channel	2	2	2	2	2	1	2	1	2	2
PF02820_PF12140_PF00536	MBT~SLED~SAM_1	2	2	2	3	2	3	2	2	2	2
PF03463_PF03464_PF03465	eRF1_1~eRF1_2~eRF1_3	2	3	2	2	2	3	2	2	2	2
PF00258_PF00667_PF00175	Flavodoxin_1~FAD_binding_1~NAD_binding_1	2	3	2	3	3	3	3	3	3	3
PF00364_PF02817_PF00198	Biotin_lipoyl~E3_binding~2-oxoacid_dh	3	3	2	3	3	2	3	3	3	3
PF04571_PF16876_PF08235	Lipin_N~Lipin_mid~LNS2	3	3	2	3	3	2	3	3	3	3
PF07648_PF10591_PF00086	Kazal_2~SPARC_Ca_bdg~Thyroglobulin_1	3	3	3	2	3	3	3	3	3	2
PF03351_PF01082_PF03712	DOMON~Cu2_monooxygen~Cu2_monoox_C	3	3	3	3	3	2	2	3	3	3
PF16470_PF00082_PF01483	S8_pro-domain~Peptidase_S8~P_proprotein	3	4	3	4	4	4	4	4	4	4
PF00093_PF01391_PF01410	VWC~Collagen~COLFI	4	3	4	4	4	4	4	4	3	4
PF06743_PF08368_PF08373	FAST_1~FAST_2~RAP	5	5	5	5	4	5	5	5	4	5
PF01839_PF08441_PF00357	FG-GAP~Integrin_alpha2~Integrin_alpha	1	1		1			2		1	1
PF07686_PF13895_PF13927	V-set~Ig_2~Ig_3	1			1		2	1		1	1
PF12884_PF12885_PF12886	TORC_N~TORC_M~TORC_C			2		1		2	2	2	2
PF13855_PF01825_PF00002	LRR_8~GPS~7tm_2	1	1	1	2		1			1	1
PF00354_PF01825_PF00002	Pentaxin~GPS~7tm_2	1	1	1			1	2		1	1
PF08477_PF16095_PF00069	Roc~COR~Pkinase	1	1		2		1	1		1	1
PF13855_PF07679_PF13927	LRR_8~I-set~Ig_3	1		1	2			1	1	1	1
PF08205_PF13927_PF13895	C2-set_2~Ig_3~Ig_2	1		1			1	1	2	1	1
PF01462_PF13855_PF00001	LRRNT~LRR_8~7tm_1		1	1	1			1	2	1	1
PF06484_PF07974_PF15636	Ten_N~EGF_2~Tox-GHH		1	2	1	1		1		1	1
PF00627_PF14604_PF00300	UBA~SH3_9~His_Phos_1			1	1	1	1		1	2	1
PF00069_PF00063_PF00612	Pkinase~Myosin_head~IQ			1		1	1	1	1	1	2
PF14670_PF07645_PF12662	FXa_inhibition~EGF_CA~cEGF	1	1	1	2	1	1		1		1
PF13637_PF12796_PF07525	Ank_4~Ank_2~SOCS_box	1	1	2	1		1	1	1	1
PF13716_PF00621_PF00169	CRAL_TRIO_2~RhoGEF~PH	1	1	2	1		1	1	1		1
PF00595_PF07653_PF00625	PDZ~SH3_2~Guanylate_kin	1	1		1		2	1	1	1	1
PF00651_PF13909_PF00096	BTB~zf-H2C2_5~zf-C2H2	2	2	2	2	1	2		2		2
PF00462_PF07992_PF02852	Glutaredoxin~Pyr_redox_2~Pyr_redox_dim	1	1	1	1	1		2	1	1	1
PF00787_PF00069_PF00433	PX~Pkinase~Pkinase_C	1	1	1	1	1		2	1	1	1
PF00651_PF07707_PF13964	BTB~BACK~Kelch_6	1	1	1	1		1	1	1	2	1
PF00551_PF02911_PF00171	Formyl_trans_N~Formyl_trans_C~Aldedh	1	1	1		1	1	2	1	1	1
PF02820_PF12618_PF16660	MBT~DUF3776~PHD20L1_u1	1	1	2		1	1	1	1	1	1
PF00611_PF00620_PF07653	FCH~RhoGAP~SH3_2	1	2	1	1	1	1		1	1	1
PF16746_PF00169_PF00620	BAR_3~PH~RhoGAP	2	1	1	1		1	1	1	1	1
PF01064_PF08515_PF07714	Activin_recp~TGF_beta_GS~Pkinase_Tyr	2	2		2	2	2	2	2	2	1
PF16746_PF00169_PF00640	BAR_3~PH~PID	2		2	2	2	1	2	2	2	2
PF00431_PF00084_PF00089	CUB~Sushi~Trypsin		1	1	1	1	1	1	1	1	2
PF00258_PF04055_PF08608	Flavodoxin_1~Radical_SAM~Wyosine_form	1	1	1	1	1	1	2	1	1	1
PF01400_PF00431_PF14670	Astacin~CUB~FXa_inhibition	1	1	1	1	1	1	1	1	2	1
PF01390_PF01825_PF00002	SEA~GPS~7tm_2	1	1	1	1	1	1	1	1	1	2
PF08699_PF02170_PF02171	ArgoL1~PAZ~Piwi	1	1	1	1	1	1	1	1	1	2
PF11934_PF01858_PF01857	DUF3452~RB_A~RB_B	1	1	1	1	1	2	1	1	1	1
PF00018_PF00787_PF10456	SH3_1~PX~BAR_3_WASP_bdg	1	1	1	1	2	1	1	1	1	1
PF00047_PF00041_PF07714	ig~fn3~Pkinase_Tyr	1	1	1	1	2	1	1	1	1	1
PF05192_PF05190_PF00488	MutS_III~MutS_IV~MutS_V	1	1	1	1	2	1	1	1	1	1
PF17146_PF15017_PF08772	PIN_6~WRNPLPNID~NOB1_Zn_bind	1	1	1	1	2	1	1	1	1	1
PF00642_PF00097_PF15815	zf-CCCH~zf-C3HC4~MKRN1_C	1	1	2	1	1	1	1	1	1	1
PF00676_PF02779_PF16870	E1_dh~Transket_pyr~OxoGdeHyase_C	1	1	2	1	1	1	1	1	1	1
PF00788_PF01843_PF00595	RA~DIL~PDZ	1	1	2	1	1	1	1	1	1	1
PF02008_PF16866_PF00646	zf-CXXC~PHD_4~F-box	1	1	2	1	1	1	1	1	1	1
PF11834_PF02214_PF00805	KHA~BTB_2~Pentapeptide	1	1	2	1	1	1	1	1	1	1
PF00071_PF08356_PF08355	Ras~EF_assoc_2~EF_assoc_1	1	2	2	2	2	2	2	2	2	2
PF00403_PF00122_PF00702	HMA~E1-E2_ATPase~Hydrolase	1	2	2	2	2	2	2	2	2	2
PF00615_PF00069_PF00169	RGS~Pkinase~PH	1	2	2	2	2	2	2	2	2	2
PF00378_PF02737_PF00725	ECH_1~3HCDH_N~3HCDH	2	1	2	2	2	2	2	2	2	2
PF14604_PF08824_PF12026	SH3_9~Serine_rich~DUF3513	2	1	2	2	2	2	2	2	2	2
PF01602_PF02883_PF09066	Adaptin_N~Alpha_adaptinC2~B2-adapt-app_C	2	2	1	2	2	2	2	2	2	2
PF12624_PF13329_PF09333	Chorein_N~ATG2_CAD~ATG_C	2	2	1	2	2	2	2	2	2	2
PF07648_PF00086_PF16597	Kazal_2~Thyroglobulin_1~Thyroglob_assoc	2	2	2	1	2	2	2	2	2	2
PF08399_PF13768_PF08473	VWA_N~VWA_3~VGCC_alpha2	2	2	2	1	2	2	2	2	2	2
PF00018_PF14604_PF00017	SH3_1~SH3_9~SH2	2	2	2	2	1	2	2	2	2	2
PF00092_PF05587_PF05586	VWA~Anth_Ig~Ant_C	2	2	2	2	1	2	2	2	2	2
PF00169_PF00784_PF00373	PH~MyTH4~FERM_M	2	2	2	2	1	2	2	2	2	2
PF02201_PF00641_PF13920	SWIB~zf-RanBP~zf-C3HC4_3	2	2	2	2	1	2	2	2	2	2
PF00055_PF00053_PF00052	Laminin_N~Laminin_EGF~Laminin_B	2	2	2	2	2	1	2	2	2	2
PF00076_PF00641_PF01585	RRM_1~zf-RanBP~G-patch	2	2	2	2	2	1	2	2	2	2
PF00249_PF07988_PF09316	Myb_DNA-binding~LMSTEN~Cmyb_C	2	2	2	2	2	1	2	2	2	2
PF00270_PF00271_PF08152	DEAD~Helicase_C~GUCT	2	2	2	2	2	1	2	2	2	2
PF00653_PF00619_PF13920	BIR~CARD~zf-C3HC4_3	2	2	2	2	2	1	2	2	2	2
PF02383_PF03372_PF08952	Syja_N~Exo_endo_phos~DUF1866	2	2	2	2	2	1	2	2	2	2
PF05406_PF02877_PF00644	WGR~PARP_reg~PARP	2	2	2	2	2	1	2	2	2	2
PF08169_PF01388_PF11717	RBB1NT~ARID~Tudor-knot	2	2	2	2	2	1	2	2	2	2
PF16214_PF00211_PF06327	AC_N~Guanylate_cyc~DUF1053	2	2	2	2	2	1	2	2	2	2
PF00058_PF14670_PF00057	Ldl_recept_b~FXa_inhibition~Ldl_recept_a	2	2	2	2	2	2	2	2	3	2
PF00168_PF00616_PF12004	C2~RasGAP~DUF3498	2	2	2	2	2	2	2	2	2	3
PF16556_PF16578_PF08357	IL17R_fnIII_D1~IL17R_fnIII_D2~SEFIR	2	2	2	2	2	2	2	2	2	1
PF00412_PF00595_PF07714	LIM~PDZ~Pkinase_Tyr	2	2	2	2	2	2	1	2	2	2
PF00611_PF00018_PF14604	FCH~SH3_1~SH3_9	2	2	2	2	2	2	1	2	2	2
PF01699_PF16494_PF03160	Na_Ca_ex~Na_Ca_ex_C~Calx-beta	2	3	3	3	3	3	3	3	3	3
PF15902_PF15901_PF00801	Sortilin-Vps10~Sortilin_C~PKD	2	3	3	3	3	3	3	3	3	3
PF00130_PF00069_PF00433	C1_1~Pkinase~Pkinase_C	3	2	2	2	2	2	2	2	2	2
PF00169_PF00069_PF00433	PH~Pkinase~Pkinase_C	3	2	3	3	3	3	3	3	3	3
PF11841_PF04727_PF16457	DUF3361~ELMO_CED12~PH_12	3	2	3	3	3	3	3	3	3	3
PF02196_PF00130_PF07714	RBD~C1_1~Pkinase_Tyr	3	3	2	3	3	3	3	3	3	3
PF13967_PF14703_PF02714	RSN1_TM~PHM7_cyt~RSN1_7TM	3	3	3	3	2	3	3	3	3	3
PF07531_PF08788_PF01753	TAFH~NHR2~zf-MYND	3	3	3	3	3	2	3	3	3	3
PF00024_PF00051_PF00089	PAN_1~Kringle~Trypsin	3	3	3	3	3	3	4	3	3	3
PF08403_PF00324_PF03522	AA_permease_N~AA_permease~SLC12	3	3	3	3	3	3	3	3	4	3
PF09068_PF09069_PF00569	EF-hand_2~EF-hand_3~ZZ	3	3	3	3	4	3	3	3	3	3
PF03530_PF07885_PF02888	SK_channel~Ion_trans_2~CaMBD	3	4	4	4	4	4	4	4	4	4
PF06371_PF06367_PF02181	Drf_GBD~Drf_FH3~FH2	5	5	5	5	6	5	5	5	5	5
PF00004_PF16193_PF12002	AAA~AAA_assoc_2~MgsA_C	1	1	1	1	1	1	1	1	1	1
PF00008_PF00051_PF00089	EGF~Kringle~Trypsin	1	1	1	1	1	1	1	1	1	1
PF00010_PF08447_PF06621	HLH~PAS_3~SIM_C	1	1	1	1	1	1	1	1	1	1
PF00039_PF00040_PF00041	fn1~fn2~fn3	1	1	1	1	1	1	1	1	1	1
PF00054_PF02210_PF16184	Laminin_G_1~Laminin_G_2~Cadherin_3	1	1	1	1	1	1	1	1	1	1
PF00063_PF06017_PF00018	Myosin_head~Myosin_TH1~SH3_1	1	1	1	1	1	1	1	1	1	1
PF00130_PF16664_PF14604	C1_1~STAC2_u1~SH3_9	1	1	1	1	1	1	1	1	1	1
PF00169_PF13855_PF00481	PH~LRR_8~PP2C	1	1	1	1	1	1	1	1	1	1
PF00173_PF00174_PF03404	Cyt-b5~Oxidored_molyb~Mo-co_dimer	1	1	1	1	1	1	1	1	1	1
PF00176_PF00538_PF00271	SNF2_N~Linker_histone~Helicase_C	1	1	1	1	1	1	1	1	1	1
PF00249_PF04433_PF01398	Myb_DNA-binding~SWIRM~JAB	1	1	1	1	1	1	1	1	1	1
PF00270_PF00271_PF08061	DEAD~Helicase_C~P68HR	1	1	1	1	1	1	1	1	1	1
PF00270_PF00271_PF16124	DEAD~Helicase_C~RecQ_Zn_bind	1	1	1	1	1	1	1	1	1	1
PF00270_PF00622_PF00271	DEAD~SPRY~Helicase_C	1	1	1	1	1	1	1	1	1	1
PF00385_PF00176_PF00271	Chromo~SNF2_N~Helicase_C	1	1	1	1	1	1	1	1	1	1
PF00400_PF07647_PF04564	WD40~SAM_2~U-box	1	1	1	1	1	1	1	1	1	1
PF00400_PF09070_PF08324	WD40~PFU~PUL	1	1	1	1	1	1	1	1	1	1
PF00400_PF09453_PF07569	WD40~HIRA_B~Hira	1	1	1	1	1	1	1	1	1	1
PF00400_PF12894_PF03451	WD40~ANAPC4_WD40~HELP	1	1	1	1	1	1	1	1	1	1
PF00439_PF00855_PF12064	Bromodomain~PWWP~DUF3544	1	1	1	1	1	1	1	1	1	1
PF00479_PF02781_PF01182	G6PD_N~G6PD_C~Glucosamine_iso	1	1	1	1	1	1	1	1	1	1
PF00505_PF09011_PF14887	HMG_box~HMG_box_2~HMG_box_5	1	1	1	1	1	1	1	1	1	1
PF00520_PF03520_PF11956	Ion_trans~KCNQ_channel~KCNQC3-Ank-G_bd	1	1	1	1	1	1	1	1	1	1
PF00533_PF00004_PF08519	BRCT~AAA~RFC1	1	1	1	1	1	1	1	1	1	1
PF00564_PF00569_PF16577	PB1~ZZ~UBA_5	1	1	1	1	1	1	1	1	1	1
PF00595_PF07653_PF00791	PDZ~SH3_2~ZU5	1	1	1	1	1	1	1	1	1	1
PF00622_PF08513_PF10607	SPRY~LisH~CLTH	1	1	1	1	1	1	1	1	1	1
PF00637_PF13923_PF12451	Clathrin~zf-C3HC4_2~VPS11_C	1	1	1	1	1	1	1	1	1	1
PF00643_PF00630_PF01436	zf-B_box~Filamin~NHL	1	1	1	1	1	1	1	1	1	1
PF00646_PF00134_PF02984	F-box~Cyclin_N~Cyclin_C	1	1	1	1	1	1	1	1	1	1
PF00651_PF13912_PF16637	BTB~zf-C2H2_6~zf-C2H2_assoc3	1	1	1	1	1	1	1	1	1	1
PF00664_PF00005_PF14396	ABC_membrane~ABC_tran~CFTR_R	1	1	1	1	1	1	1	1	1	1
PF00730_PF00633_PF14815	HhH-GPD~HHH~NUDIX_4	1	1	1	1	1	1	1	1	1	1
PF00780_PF10366_PF10367	CNH~Vps39_1~Vps39_2	1	1	1	1	1	1	1	1	1	1
PF00787_PF00614_PF13091	PX~PLDc~PLDc_2	1	1	1	1	1	1	1	1	1	1
PF00787_PF04212_PF00069	PX~MIT~Pkinase	1	1	1	1	1	1	1	1	1	1
PF00790_PF01363_PF12210	VHS~FYVE~Hrs_helical	1	1	1	1	1	1	1	1	1	1
PF00856_PF00397_PF08236	SET~WW~SRI	1	1	1	1	1	1	1	1	1	1
PF00856_PF00439_PF01426	SET~Bromodomain~BAH	1	1	1	1	1	1	1	1	1	1
PF00899_PF14732_PF16195	ThiF~UAE_UbL~UBA2_C	1	1	1	1	1	1	1	1	1	1
PF00907_PF16059_PF00010	T-box~DUF4801~HLH	1	1	1	1	1	1	1	1	1	1
PF01056_PF00010_PF02344	Myc_N~HLH~Myc-LZ	1	1	1	1	1	1	1	1	1	1
PF01082_PF03712_PF01436	Cu2_monooxygen~Cu2_monoox_C~NHL	1	1	1	1	1	1	1	1	1	1
PF01363_PF11409_PF11979	FYVE~SARA~DUF3480	1	1	1	1	1	1	1	1	1	1
PF01363_PF11464_PF16601	FYVE~Rbsn~NPF	1	1	1	1	1	1	1	1	1	1
PF01400_PF00629_PF00008	Astacin~MAM~EGF	1	1	1	1	1	1	1	1	1	1
PF01411_PF07973_PF02272	tRNA-synt_2c~tRNA_SAD~DHHA1	1	1	1	1	1	1	1	1	1	1
PF01426_PF00004_PF09079	BAH~AAA~Cdc6_C	1	1	1	1	1	1	1	1	1	1
PF01480_PF08572_PF06544	PWI~PRP3~DUF1115	1	1	1	1	1	1	1	1	1	1
PF01512_PF10531_PF10589	Complex1_51K~SLBB~NADH_4Fe-4S	1	1	1	1	1	1	1	1	1	1
PF01602_PF07718_PF14806	Adaptin_N~Coatamer_beta_C~Coatomer_b_Cpla	1	1	1	1	1	1	1	1	1	1
PF01602_PF14797_PF14796	Adaptin_N~SEEEED~AP3B1_C	1	1	1	1	1	1	1	1	1	1
PF01728_PF11861_PF07780	FtsJ~DUF3381~Spb1_C	1	1	1	1	1	1	1	1	1	1
PF01805_PF04818_PF01585	Surp~CTD_bind~G-patch	1	1	1	1	1	1	1	1	1	1
PF01805_PF12230_PF00240	Surp~PRP21_like_P~ubiquitin	1	1	1	1	1	1	1	1	1	1
PF01834_PF00533_PF16589	XRCC1_N~BRCT~BRCT_2	1	1	1	1	1	1	1	1	1	1
PF01936_PF11608_PF12872	NYN~Limkain-b1~OST-HTH	1	1	1	1	1	1	1	1	1	1
PF02002_PF08271_PF11521	TFIIE_alpha~TF_Zn_Ribbon~TFIIE-A_C	1	1	1	1	1	1	1	1	1	1
PF02099_PF02809_PF16619	Josephin~UIM~SUIM_assoc	1	1	1	1	1	1	1	1	1	1
PF02155_PF00105_PF00104	GCR~zf-C4~Hormone_recep	1	1	1	1	1	1	1	1	1	1
PF02161_PF00105_PF00104	Prog_receptor~zf-C4~Hormone_recep	1	1	1	1	1	1	1	1	1	1
PF02166_PF00105_PF00104	Androgen_recep~zf-C4~Hormone_recep	1	1	1	1	1	1	1	1	1	1
PF02208_PF14604_PF00018	Sorb~SH3_9~SH3_1	1	1	1	1	1	1	1	1	1	1
PF02825_PF00536_PF02862	WWE~SAM_1~DDHD	1	1	1	1	1	1	1	1	1	1
PF02854_PF09088_PF09090	MIF4G~MIF4G_like~MIF4G_like_2	1	1	1	1	1	1	1	1	1	1
PF02874_PF16886_PF00006	ATP-synt_ab_N~ATP-synt_ab_Xtn~ATP-synt_ab	1	1	1	1	1	1	1	1	1	1
PF03097_PF13949_PF00102	BRO1~ALIX_LYPXL_bnd~Y_phosphatase	1	1	1	1	1	1	1	1	1	1
PF03104_PF00136_PF08490	DNA_pol_B_exo1~DNA_pol_B~DUF1744	1	1	1	1	1	1	1	1	1	1
PF03234_PF08565_PF08564	CDC37_N~CDC37_M~CDC37_C	1	1	1	1	1	1	1	1	1	1
PF03477_PF00317_PF02867	ATP-cone~Ribonuc_red_lgN~Ribonuc_red_lgC	1	1	1	1	1	1	1	1	1	1
PF03485_PF00750_PF05746	Arg_tRNA_synt_N~tRNA-synt_1d~DALR_1	1	1	1	1	1	1	1	1	1	1
PF03810_PF08506_PF03378	IBN_N~Cse1~CAS_CSE1	1	1	1	1	1	1	1	1	1	1
PF04068_PF00037_PF00005	RLI~Fer4~ABC_tran	1	1	1	1	1	1	1	1	1	1
PF04212_PF00648_PF01067	MIT~Peptidase_C2~Calpain_III	1	1	1	1	1	1	1	1	1	1
PF04438_PF00270_PF00271	zf-HIT~DEAD~Helicase_C	1	1	1	1	1	1	1	1	1	1
PF04564_PF08606_PF00400	U-box~Prp19~WD40	1	1	1	1	1	1	1	1	1	1
PF04814_PF00046_PF04812	HNF-1_N~Homeobox~HNF-1B_C	1	1	1	1	1	1	1	1	1	1
PF04904_PF04905_PF04902	NCD1~NCD2~Nab1	1	1	1	1	1	1	1	1	1	1
PF04928_PF01909_PF04926	PAP_central~NTP_transf_2~PAP_RNA-bind	1	1	1	1	1	1	1	1	1	1
PF05222_PF03435_PF16653	AlaDh_PNT_N~Sacchrp_dh_NADP~Sacchrp_dh_C	1	1	1	1	1	1	1	1	1	1
PF05422_PF16978_PF16979	SIN1~CRIM~SIN1_PH	1	1	1	1	1	1	1	1	1	1
PF05495_PF13639_PF14599	zf-CHY~zf-RING_2~zinc_ribbon_6	1	1	1	1	1	1	1	1	1	1
PF05833_PF05670_PF11923	FbpA~DUF814~DUF3441	1	1	1	1	1	1	1	1	1	1
PF06467_PF14291_PF05699	zf-FCS~DUF4371~Dimer_Tnp_hAT	1	1	1	1	1	1	1	1	1	1
PF06733_PF06777_PF13307	DEAD_2~HBB~Helicase_C_2	1	1	1	1	1	1	1	1	1	1
PF07443_PF00176_PF00271	HARP~SNF2_N~Helicase_C	1	1	1	1	1	1	1	1	1	1
PF07502_PF00014_PF00057	MANEC~Kunitz_BPTI~Ldl_recept_a	1	1	1	1	1	1	1	1	1	1
PF07546_PF01391_PF00386	EMI~Collagen~C1q	1	1	1	1	1	1	1	1	1	1
PF07576_PF13639_PF02148	BRAP2~zf-RING_2~zf-UBP	1	1	1	1	1	1	1	1	1	1
PF07679_PF00041_PF07714	I-set~fn3~Pkinase_Tyr	1	1	1	1	1	1	1	1	1	1
PF07679_PF13895_PF13927	I-set~Ig_2~Ig_3	1	1	1	1	1	1	1	1	1	1
PF07941_PF02214_PF00520	K_channel_TID~BTB_2~Ion_trans	1	1	1	1	1	1	1	1	1	1
PF08198_PF03020_PF11560	Thymopoietin~LEM~LAP2alpha	1	1	1	1	1	1	1	1	1	1
PF08558_PF16772_PF00249	TRF~TERF2_RBM~Myb_DNA-binding	1	1	1	1	1	1	1	1	1	1
PF08563_PF00870_PF07710	P53_TAD~P53~P53_tetramer	1	1	1	1	1	1	1	1	1	1
PF08604_PF00641_PF10599	Nup153~zf-RanBP~Nup_retrotrp_bd	1	1	1	1	1	1	1	1	1	1
PF08711_PF15694_PF15693	Med26~Med26_M~Med26_C	1	1	1	1	1	1	1	1	1	1
PF08969_PF00581_PF00443	USP8_dimer~Rhodanese~UCH	1	1	1	1	1	1	1	1	1	1
PF09041_PF12214_PF06886	Aurora-A_bind~TPX2_importin~TPX2	1	1	1	1	1	1	1	1	1	1
PF09045_PF00595_PF16667	L27_2~PDZ~MPDZ_u10	1	1	1	1	1	1	1	1	1	1
PF09049_PF09050_PF09051	SNN_transmemb~SNN_linker~SNN_cytoplasm	1	1	1	1	1	1	1	1	1	1
PF09165_PF02921_PF00355	Ubiq-Cytc-red_N~UCR_TM~Rieske	1	1	1	1	1	1	1	1	1	1
PF09263_PF09262_PF00004	PEX-2N~PEX-1N~AAA	1	1	1	1	1	1	1	1	1	1
PF09307_PF08831_PF00086	MHC2-interact~MHCassoc_trimer~Thyroglobulin_1	1	1	1	1	1	1	1	1	1	1
PF10162_PF15711_PF13330	G8~ILEI~Mucin2_WxxW	1	1	1	1	1	1	1	1	1	1
PF10396_PF12631_PF01926	TrmE_N~MnmE_helical~MMR_HSR1	1	1	1	1	1	1	1	1	1	1
PF10481_PF10473_PF10490	CENP-F_N~CENP-F_leu_zip~CENP-F_C_Rb_bdg	1	1	1	1	1	1	1	1	1	1
PF10580_PF00612_PF06614	Neuromodulin_N~IQ~Neuromodulin	1	1	1	1	1	1	1	1	1	1
PF11515_PF03256_PF00888	Cul7~ANAPC10~Cullin	1	1	1	1	1	1	1	1	1	1
PF11620_PF02198_PF00178	GABP-alpha~SAM_PNT~Ets	1	1	1	1	1	1	1	1	1	1
PF11864_PF03542_PF02145	DUF3384~Tuberin~Rap_GAP	1	1	1	1	1	1	1	1	1	1
PF11928_PF00096_PF11914	DUF3446~zf-C2H2~DUF3432	1	1	1	1	1	1	1	1	1	1
PF11942_PF03439_PF00467	Spt5_N~Spt5-NGN~KOW	1	1	1	1	1	1	1	1	1	1
PF12054_PF00176_PF00271	DUF3535~SNF2_N~Helicase_C	1	1	1	1	1	1	1	1	1	1
PF12738_PF00533_PF00621	PTCB-BRCT~BRCT~RhoGEF	1	1	1	1	1	1	1	1	1	1
PF12738_PF00533_PF16770	PTCB-BRCT~BRCT~RTT107_BRCT_5	1	1	1	1	1	1	1	1	1	1
PF12796_PF00063_PF15439	Ank_2~Myosin_head~NYAP_N	1	1	1	1	1	1	1	1	1	1
PF12796_PF00415_PF00651	Ank_2~RCC1~BTB	1	1	1	1	1	1	1	1	1	1
PF12796_PF13637_PF07693	Ank_2~Ank_4~KAP_NTPase	1	1	1	1	1	1	1	1	1	1
PF12937_PF13415_PF07646	F-box-like~Kelch_3~Kelch_2	1	1	1	1	1	1	1	1	1	1
PF13185_PF01590_PF00233	GAF_2~GAF~PDEase_I	1	1	1	1	1	1	1	1	1	1
PF13306_PF13855_PF07679	LRR_5~LRR_8~I-set	1	1	1	1	1	1	1	1	1	1
PF13445_PF00643_PF00041	zf-RING_UBOX~zf-B_box~fn3	1	1	1	1	1	1	1	1	1	1
PF13445_PF00643_PF00630	zf-RING_UBOX~zf-B_box~Filamin	1	1	1	1	1	1	1	1	1	1
PF13517_PF07593_PF07645	VCBS~UnbV_ASPIC~EGF_CA	1	1	1	1	1	1	1	1	1	1
PF13589_PF01119_PF16413	HATPase_c_3~DNA_mis_repair~Mlh1_C	1	1	1	1	1	1	1	1	1	1
PF13625_PF04851_PF16203	Helicase_C_3~ResIII~ERCC3_RAD25_C	1	1	1	1	1	1	1	1	1	1
PF13649_PF05649_PF01431	Methyltransf_25~Peptidase_M13_N~Peptidase_M13	1	1	1	1	1	1	1	1	1	1
PF13855_PF12799_PF00626	LRR_8~LRR_4~Gelsolin	1	1	1	1	1	1	1	1	1	1
PF13892_PF00176_PF00271	DBINO~SNF2_N~Helicase_C	1	1	1	1	1	1	1	1	1	1
PF13909_PF16606_PF00096	zf-H2C2_5~zf-C2H2_assoc~zf-C2H2	1	1	1	1	1	1	1	1	1	1
PF14444_PF14443_PF02037	S1-like~DBC1~SAP	1	1	1	1	1	1	1	1	1	1
PF14555_PF08059_PF00789	UBA_4~SEP~UBX	1	1	1	1	1	1	1	1	1	1
PF14555_PF13899_PF00789	UBA_4~Thioredoxin_7~UBX	1	1	1	1	1	1	1	1	1	1
PF14622_PF00636_PF00035	Ribonucleas_3_3~Ribonuclease_3~dsrm	1	1	1	1	1	1	1	1	1	1
PF14634_PF00643_PF00628	zf-RING_5~zf-B_box~PHD	1	1	1	1	1	1	1	1	1	1
PF14745_PF14744_PF14746	WASH-7_N~WASH-7_mid~WASH-7_C	1	1	1	1	1	1	1	1	1	1
PF14918_PF14919_PF14920	MTBP_N~MTBP_mid~MTBP_C	1	1	1	1	1	1	1	1	1	1
PF15622_PF15620_PF11699	CENP_C_N~CENP-C_mid~CENP-C_C	1	1	1	1	1	1	1	1	1	1
PF15808_PF12796_PF16553	BCOR~Ank_2~PUFD	1	1	1	1	1	1	1	1	1	1
PF16018_PF08174_PF00169	Anillin_N~Anillin~PH	1	1	1	1	1	1	1	1	1	1
PF16114_PF02629_PF00549	Citrate_bind~CoA_binding~Ligase_CoA	1	1	1	1	1	1	1	1	1	1
PF16184_PF03160_PF00059	Cadherin_3~Calx-beta~Lectin_C	1	1	1	1	1	1	1	1	1	1
PF16185_PF00664_PF00005	MTABC_N~ABC_membrane~ABC_tran	1	1	1	1	1	1	1	1	1	1
PF16368_PF16367_PF16366	CEBP1_N~RRM_7~CEBP_ZZ	1	1	1	1	1	1	1	1	1	1
PF16399_PF13086_PF13087	Aquarius_N~AAA_11~AAA_12	1	1	1	1	1	1	1	1	1	1
PF16589_PF08914_PF11626	BRCT_2~Myb_DNA-bind_2~Rap1_C	1	1	1	1	1	1	1	1	1	1
PF16656_PF00149_PF14008	Pur_ac_phosph_N~Metallophos~Metallophos_C	1	1	1	1	1	1	1	1	1	1
PF16661_PF10996_PF07521	Lactamase_B_6~Beta-Casp~RMMBL	1	1	1	1	1	1	1	1	1	1
PF16705_PF13857_PF00373	NUDIX_5~Ank_5~FERM_M	1	1	1	1	1	1	1	1	1	1
PF17285_PF05185_PF17286	PRMT5	1	1	1	1	1	1	1	1	1	1
PF17391_PF01175_PF17392	Urocanase	1	1	1	1	1	1	1	1	1	1
PF00355_PF07992_PF14759	Rieske~Pyr_redox_2~Reductase_C	1	1	1	1	1	1	1	1	1
PF00415_PF00622_PF00632	RCC1~SPRY~HECT	1	1	1	1	1	1	1	1	1
PF00458_PF13393_PF03129	WHEP-TRS~tRNA-synt_His~HGTP_anticodon	1	1	1	1	1	1	1	1	1
PF00594_PF14670_PF00089	Gla~FXa_inhibition~Trypsin	1	1	1	1	1	1	1	1	1
PF01833_PF10162_PF13229	TIG~G8~Beta_helix	1	1	1	1	1	1	1	1	1
PF07529_PF00176_PF00271	HSA~SNF2_N~Helicase_C	1	1	1	1	1	1	1	1	1
PF13087_PF00773_PF13086	AAA_12~RNB~AAA_11	1	1	1	1	1	1	1	1	1
PF00629_PF12810_PF07714	MAM~Gly_rich~Pkinase_Tyr	1	1	1	1	1	1	1	1		1
PF00619_PF00931_PF00400	CARD~NB-ARC~WD40	1	1	1	1	1	1	1		1	1
PF00651_PF13912_PF00096	BTB~zf-C2H2_6~zf-C2H2	1	1	1	1	1	1	1		1	1
PF09791_PF00970_PF00175	Oxidored-like~FAD_binding_6~NAD_binding_1	1	1	1	1	1	1	1		1	1
PF12796_PF07724_PF10431	Ank_2~AAA_2~ClpB_D2-small	1	1	1	1	1	1	1		1	1
PF15423_PF04500_PF16662	FLYWCH_N~FLYWCH~FLYWCH_u	1	1	1	1	1	1	1		1	1
PF00615_PF02196_PF02188	RGS~RBD~GoLoco	1	1	1	1	1	1	1		1
PF13854_PF13964_PF13418	Kelch_5~Kelch_6~Kelch_4	1	1	1	1	1	1	1			1
PF00176_PF00271_PF01844	SNF2_N~Helicase_C~HNH	1	1	1	1	1	1		1	1	1
PF01834_PF08344_PF00520	XRCC1_N~TRP_2~Ion_trans	1	1	1	1	1	1		1	1	1
PF03098_PF00084_PF07645	An_peroxidase~Sushi~EGF_CA	1	1	1	1	1	1		1	1	1
PF12937_PF13229_PF02207	F-box-like~Beta_helix~zf-UBR	1	1	1	1	1	1		1	1	1
PF14050_PF16273_PF04969	Nudc_N~NuDC~CS	1	1	1	1	1	1		1	1	1
PF02208_PF00018_PF14604	Sorb~SH3_1~SH3_9	1	1	1	1	1	1		1	1
PF13857_PF13637_PF12796	Ank_5~Ank_4~Ank_2	1	1	1	1	1	1		1		1
PF15663_PF00642_PF00098	zf-CCCH_3~zf-CCCH~zf-CCHC	1	1	1	1	1	1		1		1
PF00538_PF00628_PF01853	Linker_histone~PHD~MOZ_SAS	1	1	1	1	1	1		1
PF13927_PF13895_PF00041	Ig_3~Ig_2~fn3	1	1	1	1	1	1		1
PF03782_PF00094_PF00084	AMOP~VWD~Sushi	1	1	1	1	1	1				1
PF00051_PF00530_PF00089	Kringle~SRCR~Trypsin	1	1	1	1	1		1	1	1	1
PF00095_PF13927_PF00014	WAP~Ig_3~Kunitz_BPTI	1	1	1	1	1		1	1	1	1
PF00168_PF08165_PF08150	C2~FerA~FerB	1	1	1	1	1		1	1	1	1
PF00266_PF03476_PF03473	Aminotran_5~MOSC_N~MOSC	1	1	1	1	1		1	1	1	1
PF00412_PF00880_PF14604	LIM~Nebulin~SH3_9	1	1	1	1	1		1	1	1	1
PF00790_PF02809_PF00018	VHS~UIM~SH3_1	1	1	1	1	1		1	1	1	1
PF00855_PF03446_PF14833	PWWP~NAD_binding_2~NAD_binding_11	1	1	1	1	1		1	1	1	1
PF01266_PF16901_PF13499	DAO~DAO_C~EF-hand_7	1	1	1	1	1		1	1	1	1
PF01562_PF13574_PF00200	Pep_M12B_propep~Reprolysin_2~Disintegrin	1	1	1	1	1		1	1	1	1
PF02837_PF00703_PF02836	Glyco_hydro_2_N~Glyco_hydro_2~Glyco_hydro_2_C	1	1	1	1	1		1	1	1	1
PF04055_PF16199_PF00583	Radical_SAM~Radical_SAM_C~Acetyltransf_1	1	1	1	1	1		1	1	1	1
PF07732_PF00394_PF07731	Cu-oxidase_3~Cu-oxidase~Cu-oxidase_2	1	1	1	1	1		1	1	1	1
PF07959_PF00288_PF08544	Fucokinase~GHMP_kinases_N~GHMP_kinases_C	1	1	1	1	1		1	1	1	1
PF08066_PF01612_PF00570	PMC2NT~DNA_pol_A_exo1~HRDC	1	1	1	1	1		1	1	1	1
PF08447_PF11413_PF08778	PAS_3~HIF-1~HIF-1a_CTAD	1	1	1	1	1		1	1	1	1
PF08702_PF12160_PF00147	Fib_alpha~Fibrinogen_aC~Fibrinogen_C	1	1	1	1	1		1	1	1	1
PF10430_PF00041_PF07714	Ig_Tie2_1~fn3~Pkinase_Tyr	1	1	1	1	1		1	1	1	1
PF11722_PF05253_PF05206	zf-TRM13_CCCH~zf-U11-48K~TRM13	1	1	1	1	1		1	1	1	1
PF12497_PF00105_PF00104	ERbeta_N~zf-C4~Hormone_recep	1	1	1	1	1		1	1	1	1
PF12937_PF09346_PF04379	F-box-like~SMI1_KNR4~DUF525	1	1	1	1	1		1	1	1	1
PF12971_PF05089_PF12972	NAGLU_N~NAGLU~NAGLU_C	1	1	1	1	1		1	1	1	1
PF13476_PF04423_PF13558	AAA_23~Rad50_zn_hook~SbcCD_C	1	1	1	1	1		1	1	1	1
PF14781_PF14783_PF14782	BBS2_N~BBS2_Mid~BBS2_C	1	1	1	1	1		1	1	1	1
PF16546_PF13414_PF00515	SGTA_dimer~TPR_11~TPR_1	1	1	1	1	1		1	1	1	1
PF02318_PF00595_PF00168	FYVE_2~PDZ~C2	1	1	1	1	1		1	1	1
PF12796_PF13637_PF00632	Ank_2~Ank_4~HECT	1	1	1	1	1		1	1	1
PF12937_PF14252_PF00621	F-box-like~DUF4347~RhoGEF	1	1	1	1	1		1	1		1
PF00618_PF00617_PF00130	RasGEF_N~RasGEF~C1_1	1	1	1	1	1		1	1
PF00097_PF02176_PF16673	zf-C3HC4~zf-TRAF~TRAF_BIRC3_bd	1	1	1	1	1		1		1	1
PF00530_PF00057_PF00089	SRCR~Ldl_recept_a~Trypsin	1	1	1	1	1		1		1	1
PF08409_PF13424_PF00515	DUF1736~TPR_12~TPR_1	1	1	1	1	1		1			1
PF00787_PF00018_PF00564	PX~SH3_1~PB1	1	1	1	1	1			1	1	1
PF00130_PF00018_PF07653	C1_1~SH3_1~SH3_2	1	1	1	1	1			1		1
PF00009_PF03144_PF11987	GTP_EFTU~GTP_EFTU_D2~IF-2	1	1	1	1		1	1	1	1	1
PF00076_PF01805_PF08312	RRM_1~Surp~cwf21	1	1	1	1		1	1	1	1	1
PF00076_PF16605_PF05391	RRM_1~LSM_int_assoc~Lsm_interact	1	1	1	1		1	1	1	1	1
PF00093_PF16184_PF03160	VWC~Cadherin_3~Calx-beta	1	1	1	1		1	1	1	1	1
PF00662_PF00361_PF06455	Proton_antipo_N~Proton_antipo_M~NADH5_C	1	1	1	1		1	1	1	1	1
PF00855_PF00505_PF00856	PWWP~HMG_box~SET	1	1	1	1		1	1	1	1	1
PF01336_PF00152_PF02938	tRNA_anti-codon~tRNA-synt_2~GAD	1	1	1	1		1	1	1	1	1
PF02194_PF00787_PF08628	PXA~PX~Nexin_C	1	1	1	1		1	1	1	1	1
PF02874_PF00006_PF00306	ATP-synt_ab_N~ATP-synt_ab~ATP-synt_ab_C	1	1	1	1		1	1	1	1	1
PF08783_PF13696_PF04564	DWNN~zf-CCHC_2~U-box	1	1	1	1		1	1	1	1	1
PF12171_PF16638_PF00096	zf-C2H2_jaz~Tristanin_u2~zf-C2H2	1	1	1	1		1	1	1	1	1
PF12577_PF00105_PF00104	PPARgamma_N~zf-C4~Hormone_recep	1	1	1	1		1	1	1	1	1
PF14761_PF14762_PF14763	HPS3_N~HPS3_Mid~HPS3_C	1	1	1	1		1	1	1	1	1
PF16573_PF16575_PF06807	CLP1_N~CLP1_P~Clp1	1	1	1	1		1	1	1	1	1
PF13895_PF00047_PF01582	Ig_2~ig~TIR	1	1	1	1		1	1		1	1
PF07546_PF07974_PF07645	EMI~EGF_2~EGF_CA	1	1	1	1		1	1			1
PF00090_PF05986_PF08686	TSP_1~ADAM_spacer1~PLAC	1	1	1	1		1				1
PF00057_PF01823_PF00084	Ldl_recept_a~MACPF~Sushi	1	1	1	1			1	1	1	1
PF14604_PF00791_PF07653	SH3_9~ZU5~SH3_2	1	1	1	1			1	1	1	1
PF13855_PF16920_PF07714	LRR_8~TPKR_C2~Pkinase_Tyr	1	1	1	1			1	1		1
PF13927_PF00041_PF07714	Ig_3~fn3~Pkinase_Tyr	1	1	1	1			1		1	1
PF09067_PF00041_PF12772	EpoR_lig-bind~fn3~GHBP	1	1	1	1			1		1
PF00023_PF12796_PF00651	Ank~Ank_2~BTB	1	1	1		1	1	1	1	1	1
PF00439_PF01426_PF00505	Bromodomain~BAH~HMG_box	1	1	1		1	1	1	1	1	1
PF00621_PF00169_PF00610	RhoGEF~PH~DEP	1	1	1		1	1	1	1	1	1
PF00653_PF12356_PF00179	BIR~BIRC6~UQ_con	1	1	1		1	1	1	1	1	1
PF05743_PF00056_PF02866	UEV~Ldh_1_N~Ldh_1_C	1	1	1		1	1	1	1	1	1
PF06119_PF00008_PF00041	NIDO~EGF~fn3	1	1	1		1	1	1	1	1	1
PF13385_PF01825_PF00002	Laminin_G_3~GPS~7tm_2	1	1	1		1	1	1	1	1	1
PF00431_PF00057_PF01392	CUB~Ldl_recept_a~Fz	1	1	1		1	1	1	1		1
PF00098_PF00270_PF00271	zf-CCHC~DEAD~Helicase_C	1	1	1		1	1		1
PF01661_PF02825_PF00644	Macro~WWE~PARP	1	1	1		1	1			1	1
PF00498_PF16508_PF08599	FHA~NIBRIN_BRCT_II~Nbs1_C	1	1	1			1	1	1	1	1
PF04086_PF02881_PF00448	SRP-alpha_N~SRP54_N~SRP54	1	1	1			1	1	1	1	1
PF09409_PF01841_PF04721	PUB~Transglut_core~PAW	1	1	1			1	1	1	1	1
PF13671_PF08590_PF01713	AAA_33~DUF1771~Smr	1	1	1			1	1	1	1
PF13855_PF13306_PF07679	LRR_8~LRR_5~I-set	1	1	1			1	1		1	1
PF12894_PF00400_PF04003	ANAPC4_WD40~WD40~Utp12	1	1	1			1	1
PF00241_PF13855_PF01582	Cofilin_ADF~LRR_8~TIR	1	1	1			1			1
PF00018_PF00017_PF07653	SH3_1~SH2~SH3_2	1	1	1				1	1	1	1
PF08487_PF13768_PF06668	VIT~VWA_3~ITI_HC_C	1	1	1						1	1
PF00063_PF06017_PF14604	Myosin_head~Myosin_TH1~SH3_9	1	1		1	1	1	1	1	1	1
PF00069_PF00169_PF00780	Pkinase~PH~CNH	1	1		1	1	1	1	1	1	1
PF02359_PF02933_PF00004	CDC48_N~CDC48_2~AAA	1	1		1	1	1	1	1	1	1
PF03721_PF00984_PF03720	UDPG_MGDP_dh_N~UDPG_MGDP_dh~UDPG_MGDP_dh_C	1	1		1	1	1	1	1	1	1
PF03810_PF08389_PF08767	IBN_N~Xpo1~CRM1_C	1	1		1	1	1	1	1	1	1
PF04851_PF00271_PF11648	ResIII~Helicase_C~RIG-I_C-RD	1	1		1	1	1	1	1	1	1
PF13921_PF00249_PF09316	Myb_DNA-bind_6~Myb_DNA-binding~Cmyb_C	1	1		1	1	1	1	1	1	1
PF10613_PF00060_PF10565	Lig_chan-Glu_bd~Lig_chan~NMDAR2_C	1	1		1	1	1	1	1	1
PF00063_PF00612_PF06017	Myosin_head~IQ~Myosin_TH1	1	1		1	1	1	1	1		1
PF12937_PF13229_PF05048	F-box-like~Beta_helix~NosD	1	1		1	1	1	1	1
PF03523_PF01391_PF00530	Macscav_rec~Collagen~SRCR	1	1		1	1	1	1		1	1
PF06328_PF09067_PF00041	Lep_receptor_Ig~EpoR_lig-bind~fn3	1	1		1	1	1				1
PF00270_PF00271_PF08147	DEAD~Helicase_C~DBP10CT	1	1		1	1		1	1	1	1
PF02833_PF12496_PF13716	DHHA2~BNIP2~CRAL_TRIO_2	1	1		1	1		1	1	1	1
PF09296_PF09297_PF00293	NUDIX-like~zf-NADH-PPase~NUDIX	1	1		1	1		1	1	1	1
PF00169_PF00595_PF00621	PH~PDZ~RhoGEF	1	1		1	1		1	1
PF12796_PF13857_PF06479	Ank_2~Ank_5~Ribonuc_2-5A	1	1		1	1		1	1
PF00043_PF00133_PF08264	GST_C~tRNA-synt_1~Anticodon_1	1	1		1		1	1	1	1	1
PF00514_PF13646_PF14381	Arm~HEAT_2~EDR1	1	1		1		1	1	1	1	1
PF00097_PF12820_PF00533	zf-C3HC4~BRCT_assoc~BRCT	1	1		1			1	1	1	1
PF04675_PF01068_PF04679	DNA_ligase_A_N~DNA_ligase_A_M~DNA_ligase_A_C	1	1		1			1	1	1	1
PF05485_PF14291_PF05699	THAP~DUF4371~Dimer_Tnp_hAT	1	1		1			1	1	1	1
PF01302_PF14580_PF14560	CAP_GLY~LRR_9~Ubiquitin_2	1	1		1					1
PF01462_PF13855_PF12799	LRRNT~LRR_8~LRR_4	1	1		1						1
PF00047_PF08205_PF13895	ig~C2-set_2~Ig_2	1	1			1	1	1	1	1	1
PF01403_PF01437_PF00047	Sema~PSI~ig	1	1			1		1	1	1	1
PF01403_PF01833_PF07714	Sema~TIG~Pkinase_Tyr	1	1			1		1	1	1	1
PF07496_PF04433_PF01593	zf-CW~SWIRM~Amino_oxidase	1	1			1		1	1	1	1
PF07546_PF00008_PF00386	EMI~EGF~C1q	1	1			1		1	1	1	1
PF00106_PF01575_PF02036	adh_short~MaoC_dehydratas~SCP2	1	1			1		1	1	1
PF07653_PF00018_PF14604	SH3_2~SH3_1~SH3_9	1	1			1		1	1		1
PF17205_PF00362_PF08725	PSI_integrin~Integrin_beta~Integrin_b_cyt	1	1			1		1		1
PF02828_PF00595_PF00625	L27~PDZ~Guanylate_kin	1	1				1	1	1
PF13855_PF00536_PF13920	LRR_8~SAM_1~zf-C3HC4_3	1	1				1		1	1
PF00219_PF00050_PF07679	IGFBP~Kazal_1~I-set	1	1				1		1		1
PF00069_PF12796_PF00531	Pkinase~Ank_2~Death	1	1				1			1	1
PF00610_PF00618_PF00617	DEP~RasGEF_N~RasGEF	1	1					1	1	1	1
PF04857_PF01424_PF08675	CAF1~R3H~RNA_bind	1	1					1	1		1
PF00651_PF00096_PF13912	BTB~zf-C2H2~zf-C2H2_6	1	1					1		1	1
PF13857_PF12796_PF00023	Ank_5~Ank_2~Ank	1	1					1		1
PF00059_PF01825_PF01477	Lectin_C~GPS~PLAT	1	1					1
PF00629_PF00057_PF00008	MAM~Ldl_recept_a~EGF	1	1					1
PF17069_PF01585_PF14709	RSRP~G-patch~DND1_DSRM	1	1						1	1	1
PF00096_PF13909_PF13912	zf-C2H2~zf-H2C2_5~zf-C2H2_6	1		1	1	1	1	1	1	1	1
PF00225_PF12423_PF12473	Kinesin~KIF1B~DUF3694	1		1	1	1	1	1	1	1	1
PF00226_PF16717_PF00249	DnaJ~RAC_head~Myb_DNA-binding	1		1	1	1	1	1	1	1	1
PF00435_PF00018_PF08726	Spectrin~SH3_1~EFhand_Ca_insen	1		1	1	1	1	1	1	1	1
PF00651_PF07707_PF00754	BTB~BACK~F5_F8_type_C	1		1	1	1	1	1	1	1	1
PF00652_PF00040_PF00059	Ricin_B_lectin~fn2~Lectin_C	1		1	1	1	1	1	1	1	1
PF01363_PF00610_PF01504	FYVE~DEP~PIP5K	1		1	1	1	1	1	1	1	1
PF06839_PF00176_PF00271	zf-GRF~SNF2_N~Helicase_C	1		1	1	1	1	1	1	1	1
PF07837_PF02971_PF04961	FTCD_N~FTCD~FTCD_C	1		1	1	1	1	1	1	1	1
PF09379_PF00373_PF13920	FERM_N~FERM_M~zf-C3HC4_3	1		1	1	1	1	1	1	1	1
PF14766_PF14767_PF14768	RPA_interact_N~RPA_interact_M~RPA_interact_C	1		1	1	1	1	1	1	1	1
PF16500_PF00134_PF02984	Cyclin_N2~Cyclin_N~Cyclin_C	1		1	1	1	1	1	1	1	1
PF16726_PF03372_PF00620	OCRL_clath_bd~Exo_endo_phos~RhoGAP	1		1	1	1	1	1	1	1	1
PF16776_PF03372_PF00620	INPP5B_PH~Exo_endo_phos~RhoGAP	1		1	1	1	1	1	1	1	1
PF17208_PF12140_PF00536	RBR~SLED~SAM_1	1		1	1	1	1	1	1	1	1
PF00225_PF00498_PF01852	Kinesin~FHA~START	1		1	1	1	1	1			1
PF00069_PF00566_PF00581	Pkinase~RabGAP-TBC~Rhodanese	1		1	1	1		1	1	1	1
PF11543_PF05020_PF05021	UN_NPL4~zf-NPL4~NPL4	1		1	1	1		1	1	1	1
PF00059_PF07645_PF09064	Lectin_C~EGF_CA~Tme5_EGF_like	1		1	1	1			1	1	1
PF17125_PF01189_PF08062	Methyltr_RsmF_N~Methyltr_RsmB-F~P120R	1		1	1			1		1
PF12796_PF00536_PF00640	Ank_2~SAM_1~PID	1		1		1	1	1	1	1
PF00059_PF12662_PF07645	Lectin_C~cEGF~EGF_CA	1		1		1		1	1	1	1
PF00254_PF00515_PF07719	FKBP_C~TPR_1~TPR_2	1		1				1	1	1	1
PF07679_PF00041_PF00047	I-set~fn3~ig	1		1				1
PF03731_PF02735_PF03730	Ku_N~Ku~Ku_C	1		1							1
PF00782_PF01331_PF03919	DSPc~mRNA_cap_enzyme~mRNA_cap_C	1			1	1	1	1	1	1	1
PF12796_PF13857_PF01237	Ank_2~Ank_5~Oxysterol_BP	1			1	1	1	1	1		1
PF02820_PF01530_PF00536	MBT~zf-C2HC~SAM_1	1			1	1	1		1		1
PF00017_PF03372_PF00536	SH2~Exo_endo_phos~SAM_1	1			1	1		1	1	1	1
PF02545_PF16864_PF00891	Maf~Dimerisation2~Methyltransf_2	1			1	1		1			1
PF12796_PF13857_PF01734	Ank_2~Ank_5~Patatin	1			1		1	1			1
PF00621_PF07653_PF14604	RhoGEF~SH3_2~SH3_9	1			1			1	1	1
PF00097_PF07653_PF00018	zf-C3HC4~SH3_2~SH3_1	1			1				1
PF00063_PF00784_PF00373	Myosin_head~MyTH4~FERM_M	1			1					1	1
PF12796_PF13637_PF07714	Ank_2~Ank_4~Pkinase_Tyr	1			1					1	1
PF13927_PF13895_PF00656	Ig_3~Ig_2~Peptidase_C14	1				1	1	1	1	1	1
PF00069_PF13637_PF12796	Pkinase~Ank_4~Ank_2	1				1	1	1	1	1
PF00092_PF00041_PF01391	VWA~fn3~Collagen	1				1	1		1	1	1
PF00018_PF08824_PF12026	SH3_1~Serine_rich~DUF3513	1				1		1	1	1	1
PF00397_PF00169_PF00620	WW~PH~RhoGAP	1						1	1	1	1
PF00097_PF00643_PF00622	zf-C3HC4~zf-B_box~SPRY	1						1	1	1
PF00028_PF07645_PF02210	Cadherin~EGF_CA~Laminin_G_2	1						1		1	1
PF03921_PF13895_PF13927	ICAM_N~Ig_2~Ig_3	1						1
PF01352_PF00096_PF13894	KRAB~zf-C2H2~zf-C2H2_4	1							1	1
PF14559_PF13923_PF02190	TPR_19~zf-C3HC4_2~LON_substr_bdg	1							1
PF13837_PF01259_PF00731	Myb_DNA-bind_4~SAICAR_synt~AIRC	1									1
PF00076_PF11764_PF00856	RRM_1~N-SET~SET	2	2	2	2	2	2	2	2	2	2
PF00076_PF14327_PF14304	RRM_1~CSTF2_hinge~CSTF_C	2	2	2	2	2	2	2	2	2	2
PF00084_PF00092_PF00089	Sushi~VWA~Trypsin	2	2	2	2	2	2	2	2	2	2
PF00084_PF02494_PF13778	Sushi~HYR~DUF4174	2	2	2	2	2	2	2	2	2	2
PF00194_PF00041_PF00102	Carb_anhydrase~fn3~Y_phosphatase	2	2	2	2	2	2	2	2	2	2
PF00292_PF00046_PF12360	PAX~Homeobox~Pax7	2	2	2	2	2	2	2	2	2	2
PF00373_PF07714_PF03623	FERM_M~Pkinase_Tyr~Focal_AT	2	2	2	2	2	2	2	2	2	2
PF00385_PF05033_PF00856	Chromo~Pre-SET~SET	2	2	2	2	2	2	2	2	2	2
PF00620_PF00017_PF16454	RhoGAP~SH2~PI3K_P85_iSH2	2	2	2	2	2	2	2	2	2	2
PF00628_PF07500_PF07744	PHD~TFIIS_M~SPOC	2	2	2	2	2	2	2	2	2	2
PF00675_PF05193_PF16187	Peptidase_M16~Peptidase_M16_C~Peptidase_M16_M	2	2	2	2	2	2	2	2	2	2
PF00870_PF07710_PF07647	P53~P53_tetramer~SAM_2	2	2	2	2	2	2	2	2	2	2
PF01586_PF00010_PF12232	Basic~HLH~Myf5	2	2	2	2	2	2	2	2	2	2
PF01602_PF02883_PF02296	Adaptin_N~Alpha_adaptinC2~Alpha_adaptin_C	2	2	2	2	2	2	2	2	2	2
PF02148_PF00443_PF00627	zf-UBP~UCH~UBA	2	2	2	2	2	2	2	2	2	2
PF02148_PF00443_PF06337	zf-UBP~UCH~DUSP	2	2	2	2	2	2	2	2	2	2
PF02190_PF00004_PF05362	LON_substr_bdg~AAA~Lon_C	2	2	2	2	2	2	2	2	2	2
PF02210_PF00008_PF01034	Laminin_G_2~EGF~Syndecan	2	2	2	2	2	2	2	2	2	2
PF02671_PF08295_PF16879	PAH~Sin3_corepress~Sin3a_C	2	2	2	2	2	2	2	2	2	2
PF02776_PF00205_PF02775	TPP_enzyme_N~TPP_enzyme_M~TPP_enzyme_C	2	2	2	2	2	2	2	2	2	2
PF06466_PF00583_PF00439	PCAF_N~Acetyltransf_1~Bromodomain	2	2	2	2	2	2	2	2	2	2
PF08399_PF00092_PF08473	VWA_N~VWA~VGCC_alpha2	2	2	2	2	2	2	2	2	2	2
PF08430_PF00250_PF09354	Forkhead_N~Forkhead~HNF_C	2	2	2	2	2	2	2	2	2	2
PF09289_PF00050_PF10591	FOLN~Kazal_1~SPARC_Ca_bdg	2	2	2	2	2	2	2	2	2	2
PF09497_PF12145_PF12144	Med12~Med12-LCEWAV~Med12-PQL	2	2	2	2	2	2	2	2	2	2
PF10358_PF00307_PF12130	NT-C2~CH~DUF3585	2	2	2	2	2	2	2	2	2	2
PF10374_PF10373_PF13638	EST1~EST1_DNA_bind~PIN_4	2	2	2	2	2	2	2	2	2	2
PF12125_PF12937_PF00400	Beta-TrCP_D~F-box-like~WD40	2	2	2	2	2	2	2	2	2	2
PF12610_PF00017_PF07525	SOCS~SH2~SOCS_box	2	2	2	2	2	2	2	2	2	2
PF14604_PF00787_PF10456	SH3_9~PX~BAR_3_WASP_bdg	2	2	2	2	2	2	2	2	2	2
PF16512_PF01846_PF00620	RhoGAP-FF1~FF~RhoGAP	2	2	2	2	2	2	2	2	2	2
PF01583_PF14306_PF01747	APS_kinase~PUA_2~ATP-sulfurylase	2	2	2	2	2		2	2	2	2
PF02366_PF02815_PF16192	PMT~MIR~PMT_4TMC	2	2		2	2	2	2	2	2	2
PF00520_PF00027_PF16526	Ion_trans~cNMP_binding~CLZ	4	4	4	4	4	4	4	4	4	4
PF08926_PF00069_PF00595	DUF1908~Pkinase~PDZ	4	4	4	4	4	4	4	4	4	4
PF10524_PF03165_PF00859	NfI_DNAbd_pre-N~MH1~CTF_NFI	4	4	4	4	4	4	4	4	4	4
PF12796_PF08344_PF00520	Ank_2~TRP_2~Ion_trans	4	4	4	4	4	4	4	4	4	4
PF00086_PF07699_PF00135	Thyroglobulin_1~Ephrin_rec_like~COesterase		1	1	1	1	1	1	1	1	1
PF00097_PF00018_PF14604	zf-C3HC4~SH3_1~SH3_9		1	1	1	1	1	1	1	1	1
PF00108_PF02803_PF02036	Thiolase_N~Thiolase_C~SCP2		1	1	1	1	1	1	1	1	1
PF00225_PF16183_PF00498	Kinesin~Kinesin_assoc~FHA		1	1	1	1	1	1	1	1	1
PF01302_PF16607_PF00443	CAP_GLY~CYLD_phos_site~UCH		1	1	1	1	1	1	1	1	1
PF01562_PF00090_PF05986	Pep_M12B_propep~TSP_1~ADAM_spacer1		1	1	1	1	1	1	1	1	1
PF02185_PF03097_PF00595	HR1~BRO1~PDZ		1	1	1	1	1	1	1	1	1
PF02295_PF00035_PF02137	z-alpha~dsrm~A_deamin		1	1	1	1	1	1	1	1	1
PF03451_PF00400_PF12894	HELP~WD40~ANAPC4_WD40		1	1	1	1	1	1	1	1	1
PF03501_PF00307_PF00681	S10_plectin~CH~Plectin		1	1	1	1	1	1	1	1	1
PF03986_PF03987_PF10381	Autophagy_N~Autophagy_act_C~Autophagy_C		1	1	1	1	1	1	1	1	1
PF05378_PF01968_PF02538	Hydant_A_N~Hydantoinase_A~Hydantoinase_B		1	1	1	1	1	1	1	1	1
PF05715_PF00595_PF00168	zf-piccolo~PDZ~C2		1	1	1	1	1	1	1	1	1
PF10384_PF12346_PF12347	Scm3~HJURP_mid~HJURP_C		1	1	1	1	1	1	1	1	1
PF12457_PF01585_PF07842	TIP_N~G-patch~GCFC		1	1	1	1	1	1	1	1	1
PF13589_PF01119_PF00505	HATPase_c_3~DNA_mis_repair~HMG_box		1	1	1	1	1	1	1	1	1
PF16474_PF00618_PF00617	KIND~RasGEF_N~RasGEF		1	1	1	1	1	1	1	1	1
PF10344_PF10347_PF10351	Fmp27~Fmp27_GFWDK~Apt1		1	1	1	1	1	1	1	1
PF00090_PF05986_PF01759	TSP_1~ADAM_spacer1~NTR		1	1	1	1	1	1	1		1
PF05605_PF00096_PF00046	zf-Di19~zf-C2H2~Homeobox		1	1	1	1	1	1		1	1
PF16832_PF16833_PF00096	EKLF_TAD1~EKLF_TAD2~zf-C2H2		1	1	1	1	1	1		1	1
PF00219_PF00093_PF02822	IGFBP~VWC~Antistasin		1	1	1	1		1	1	1	1
PF00515_PF08321_PF00149	TPR_1~PPP5~Metallophos		1	1	1	1		1	1	1	1
PF00595_PF00787_PF00788	PDZ~PX~RA		1	1	1	1		1	1	1	1
PF00628_PF02008_PF12269	PHD~zf-CXXC~zf-CpG_bind_C		1	1	1	1		1	1	1	1
PF00787_PF00018_PF07653	PX~SH3_1~SH3_2		1	1	1	1		1	1	1	1
PF00791_PF17217_PF00531	ZU5~UPA~Death		1	1	1	1		1	1	1	1
PF08271_PF00382_PF07741	TF_Zn_Ribbon~TFIIB~BRF1		1	1	1	1		1	1	1	1
PF11547_PF00658_PF00632	E3_UbLigase_EDD~PABP~HECT		1	1	1	1		1	1	1	1
PF15441_PF00621_PF14604	ARHGEF5_35~RhoGEF~SH3_9		1	1	1	1		1	1	1	1
PF01149_PF06831_PF09292	Fapy_DNA_glyco~H2TH~Neil1-DNA_bind		1	1	1	1			1	1	1
PF13855_PF00008_PF00041	LRR_8~EGF~fn3		1	1	1	1			1		1
PF07679_PF16650_PF00069	I-set~SPEG_u2~Pkinase		1	1	1		1	1	1	1	1
PF13964_PF13418_PF07646	Kelch_6~Kelch_4~Kelch_2		1	1	1		1		1	1	1
PF08384_PF00976_PF08035	NPP~ACTH_domain~Op_neuropeptide		1	1	1			1	1	1	1
PF08629_PF13426_PF00233	PDE8~PAS_9~PDEase_I		1	1	1			1	1	1	1
PF00093_PF07645_PF12947	VWC~EGF_CA~EGF_3		1	1	1			1		1
PF08938_PF00009_PF03143	HBS1_N~GTP_EFTU~GTP_EFTU_D3		1	1	1				1	1	1
PF12409_PF00690_PF00122	P5-ATPase~Cation_ATPase_N~E1-E2_ATPase		1	1	1				1		1
PF00564_PF00569_PF16158	PB1~ZZ~N_BRCA1_IG		1	1		1	1	1	1	1	1
PF02014_PF06468_PF00090	Reeler~Spond_N~TSP_1		1	1		1	1	1	1	1	1
PF13445_PF13765_PF00622	zf-RING_UBOX~PRY~SPRY		1	1		1	1	1		1
PF05279_PF13432_PF05118	Asp-B-Hydro_N~TPR_16~Asp_Arg_Hydrox		1	1		1		1	1	1	1
PF13923_PF14604_PF00018	zf-C3HC4_2~SH3_9~SH3_1		1	1		1			1	1
PF00270_PF00271_PF00476	DEAD~Helicase_C~DNA_pol_A		1	1			1	1	1	1	1
PF00994_PF03453_PF03454	MoCF_biosynth~MoeA_N~MoeA_C		1	1			1	1	1	1	1
PF01462_PF12369_PF00001	LRRNT~GnHR_trans~7tm_1		1	1			1	1	1		1
PF02204_PF13857_PF12796	VPS9~Ank_5~Ank_2		1	1			1		1
PF01403_PF01437_PF13895	Sema~PSI~Ig_2		1	1				1	1
PF14604_PF00169_PF00620	SH3_9~PH~RhoGAP		1	1						1
PF00801_PF02010_PF01477	PKD~REJ~PLAT		1		1	1	1	1	1	1
PF01392_PF00246_PF13620	Fz~Peptidase_M14~CarboxypepD_reg		1		1	1		1	1	1	1
PF03104_PF00136_PF14260	DNA_pol_B_exo1~DNA_pol_B~zf-C4pol		1		1	1		1	1	1	1
PF12796_PF13637_PF01529	Ank_2~Ank_4~zf-DHHC		1		1	1		1		1	1
PF15227_PF13923_PF02190	zf-C3HC4_4~zf-C3HC4_2~LON_substr_bdg		1		1	1		1		1
PF08205_PF13895_PF13927	C2-set_2~Ig_2~Ig_3		1		1	1					1
PF13424_PF13176_PF12770	TPR_12~TPR_7~CHAT		1		1		1			1
PF13637_PF12796_PF07647	Ank_4~Ank_2~SAM_2		1		1				1	1
PF09032_PF04969_PF05002	Siah-Interact_N~CS~SGS		1			1	1	1	1	1	1
PF02885_PF00591_PF07831	Glycos_trans_3N~Glycos_transf_3~PYNP_C		1			1		1	1	1
PF07546_PF00008_PF07645	EMI~EGF~EGF_CA		1				1	1
PF12796_PF13857_PF07525	Ank_2~Ank_5~SOCS_box		1				1		1	1
PF01352_PF02023_PF00096	KRAB~SCAN~zf-C2H2		1					1	1	1	1
PF01429_PF05033_PF13771	MBD~Pre-SET~zf-HC5HC2H		1					1		1
PF01352_PF13894_PF00096	KRAB~zf-C2H2_4~zf-C2H2		1					1
PF07732_PF07731_PF00754	Cu-oxidase_3~Cu-oxidase_2~F5_F8_type_C		1						1		1
PF01033_PF02389_PF00045	Somatomedin_B~Cornifin~Hemopexin		1						1
PF07546_PF14670_PF07645	EMI~FXa_inhibition~EGF_CA		1						1
PF07645_PF12947_PF00100	EGF_CA~EGF_3~Zona_pellucida		1						1
PF08409_PF13432_PF00515	DUF1736~TPR_16~TPR_1		1						1
PF07686_PF07679_PF13927	V-set~I-set~Ig_3		2					2
PF00084_PF01094_PF00003	Sushi~ANF_receptor~7tm_3			1	1	1	1	1	1	1	1
PF10382_PF06839_PF13087	DUF2439~zf-GRF~AAA_12			1	1	1	1	1	1	1	1
PF00090_PF07679_PF08686	TSP_1~I-set~PLAC			1	1	1		1	1		1
PF13855_PF07647_PF13920	LRR_8~SAM_2~zf-C3HC4_3			1	1	1		1			1
PF08696_PF13086_PF13087	Dna2~AAA_11~AAA_12			1	1		1	1	1	1	1
PF06278_PF16869_PF16858	CNDH2_N~CNDH2_M~CNDH2_C~CNDH2_M			1	1		1	1	1		1
PF00642_PF13086_PF13087	zf-CCCH~AAA_11~AAA_12			1		1		1	1	1	1
PF13167_PF16360_PF01926	GTP-bdg_N~GTP-bdg_M~MMR_HSR1			1		1		1	1	1	1
PF13385_PF05572_PF00084	Laminin_G_3~Peptidase_M43~Sushi			1		1		1	1	1	1
PF07646_PF13415_PF01344	Kelch_2~Kelch_3~Kelch_1			1		1		1	1
PF00090_PF00057_PF01823	TSP_1~Ldl_recept_a~MACPF			1		1		1
PF07686_PF00047_PF07679	V-set~ig~I-set			1		1		1
PF13414_PF07719_PF13424	TPR_11~TPR_2~TPR_12			1		1		1
PF00651_PF12171_PF00096	BTB~zf-C2H2_jaz~zf-C2H2			1		1					1
PF13418_PF13415_PF07646	Kelch_4~Kelch_3~Kelch_2			1			1		1
PF16489_PF01825_PF00002	GAIN~GPS~7tm_2			1			1				1
PF06831_PF00641_PF06839	H2TH~zf-RanBP~zf-GRF			1				1	1	1	1
PF06328_PF09240_PF00041	Lep_receptor_Ig~IL6Ra-bind~fn3			1				1	1	1
PF07714_PF12721_PF00531	Pkinase_Tyr~RHIM~Death			1				1	1
PF00617_PF13202_PF00130	RasGEF~EF-hand_5~C1_1			1				1
PF03172_PF01342_PF00439	HSR~SAND~Bromodomain			1					1	1
PF00169_PF00621_PF00617	PH~RhoGEF~RasGEF			1					1
PF07648_PF07679_PF13927	Kazal_2~I-set~Ig_3			1						1	1
PF07714_PF12796_PF00023	Pkinase_Tyr~Ank_2~Ank			1						1
PF01400_PF00431_PF07645	Astacin~CUB~EGF_CA			1							1
PF00566_PF00018_PF02759	RabGAP-TBC~SH3_1~RUN				1	1	1	1	1	1	1
PF00009_PF14492_PF00679	GTP_EFTU~EFG_II~EFG_C				1	1	1	1	1		1
PF00683_PF07645_PF00008	TB~EGF_CA~EGF				1	1					1
PF00400_PF12894_PF12341	WD40~ANAPC4_WD40~Mcl1_mid				1		1	1		1	1
PF07686_PF08205_PF13895	V-set~C2-set_2~Ig_2				1		1		1	1	1
PF00094_PF01826_PF08742	VWD~TIL~C8				1			1	1		1
PF01437_PF01833_PF08337	PSI~TIG~Plexin_cytopl				1			1
PF13923_PF00018_PF14604	zf-C3HC4_2~SH3_1~SH3_9				1			1
PF00130_PF14604_PF07653	C1_1~SH3_9~SH3_2				1				1
PF01462_PF13855_PF07679	LRRNT~LRR_8~I-set				1				1
PF12453_PF12567_PF00102	PTP_N~CD45~Y_phosphatase				1				1
PF12075_PF13637_PF12796	KN_motif~Ank_4~Ank_2				1						1
PF00018_PF00169_PF00620	SH3_1~PH~RhoGAP					1	1	1	1		1
PF07679_PF13895_PF01582	I-set~Ig_2~TIR					1	1		1
PF00168_PF00595_PF00615	C2~PDZ~RGS					1		1	1	1	1
PF09409_PF16678_PF01485	PUB~HOIP-UBA~IBR					1		1	1
PF01833_PF07691_PF10162	TIG~PA14~G8					1		1		1
PF00642_PF02825_PF00644	zf-CCCH~WWE~PARP					1		1
PF14716_PF14792_PF14791	HHH_8~DNA_pol_B_palm~DNA_pol_B_thumb					1		1
PF00041_PF13765_PF00622	fn3~PRY~SPRY					1			1	1
PF12796_PF00023_PF07714	Ank_2~Ank~Pkinase_Tyr					1			1
PF01352_PF00096_PF12874	KRAB~zf-C2H2~zf-met					1					1
PF02037_PF04037_PF04046	SAP~DUF382~PSP						1	1
PF07686_PF00047_PF13927	V-set~ig~Ig_3						1	1
PF08205_PF13927_PF00041	C2-set_2~Ig_3~fn3						1		1
PF08409_PF13424_PF13432	DUF1736~TPR_12~TPR_16						1			1
PF00498_PF15276_PF08065	FHA~PP1_bind~K167R							1	1	1
PF03024_PF07995_PF00530	Folate_rec~GSDH~SRCR							1	1		1
PF13385_PF01391_PF06482	Laminin_G_3~Collagen~Endostatin							1	1		1
PF00047_PF13927_PF07714	ig~Ig_3~Pkinase_Tyr							1	1
PF00787_PF14604_PF00620	PX~SH3_9~RhoGAP							1	1
PF02210_PF00093_PF07645	Laminin_G_2~VWC~EGF_CA							1		1	1
PF07679_PF13927_PF00047	I-set~Ig_3~ig							1		1
PF00084_PF00008_PF07645	Sushi~EGF~EGF_CA							1			1
PF13927_PF13895_PF00047	Ig_3~Ig_2~ig							1			1
PF00225_PF00498_PF12423	Kinesin~FHA~KIF1B								1	1	1
PF11952_PF01585_PF01424	XTBD~G-patch~R3H								1	1	1
PF12075_PF12796_PF13857	KN_motif~Ank_2~Ank_5								1	1	1
PF15780_PF00307_PF00612	ASH~CH~IQ								1	1	1
PF00047_PF05790_PF09191	ig~C2-set~CD4-extracel								1	1
PF12738_PF12258_PF16589	PTCB-BRCT~Microcephalin~BRCT_2								1	1
PF17205_PF00362_PF07965	PSI_integrin~Integrin_beta~Integrin_B_tail								1	1
PF00431_PF01825_PF00002	CUB~GPS~7tm_2								1		1
PF00515_PF00018_PF00564	TPR_1~SH3_1~PB1								1		1
PF13895_PF13927_PF00530	Ig_2~Ig_3~SRCR								1		1
PF13895_PF13927_PF01582	Ig_2~Ig_3~TIR								1		1
PF00607_PF00098_PF14787	Gag_p24~zf-CCHC~zf-CCHC_5									1	1
PF12796_PF13637_PF00013	Ank_2~Ank_4~KH_1									1	1
PF13895_PF00047_PF13927	Ig_2~ig~Ig_3									1	1
PF00362_PF07965_PF08725	Integrin_beta~Integrin_B_tail~Integrin_b_cyt	2				2
PF03172_PF01342_PF01429	HSR~SAND~MBD	1	1	1	1		1
PF07679_PF08205_PF13895	I-set~C2-set_2~Ig_2	1	1	1	1		1
PF00001_PF00091_PF03953	7tm_1~Tubulin~Tubulin_C	1	1	1	1
PF00176_PF00271_PF14773	SNF2_N~Helicase_C~VIGSSK	1	1	1
PF00554_PF16179_PF16181	RHD_DNA_bind~RHD_dimer~RelB_transactiv	1	1	1
PF01562_PF01421_PF00200	Pep_M12B_propep~Reprolysin~Disintegrin	1	1		1	1
PF07719_PF00018_PF00564	TPR_2~SH3_1~PB1	1	1			1
PF00069_PF13393_PF12745	Pkinase~tRNA-synt_His~HGTP_anticodon2	1	1
PF00092_PF07645_PF10393	VWA~EGF_CA~Matrilin_ccoil	1	1
PF00388_PF00387_PF00168	PI-PLC-X~PI-PLC-Y~C2	1	1
PF00605_PF00385_PF01393	IRF~Chromo~Chromo_shadow	1	1
PF00781_PF00609_PF12796	DAGK_cat~DAGK_acc~Ank_2	1	1
PF01030_PF00757_PF14843	Recep_L_domain~Furin-like~GF_recep_IV	1	1
PF01909_PF10421_PF00240	NTP_transf_2~OAS1_C~ubiquitin	1		1	1		1
PF02023_PF13843_PF13842	SCAN~DDE_Tnp_1_7~Tnp_zf-ribbon_2	1		1
PF07679_PF05790_PF13927	I-set~C2-set~Ig_3	1		1
PF00096_PF01352_PF13912	zf-C2H2~KRAB~zf-C2H2_6	1			1		1
PF00498_PF11969_PF16278	FHA~DcpS_C~zf-C2HE	1			1		1
PF11265_PF11235_PF11232	Med25_VWA~Med25_SD1~Med25	1			1
PF13638_PF00773_PF17215	PIN_4~RNB~Rrp44_S1	1				1	1
PF00013_PF12235_PF16098	KH_1~FXMRP1_C_core~FXMR_C2	1				1
PF13445_PF00643_PF13765	zf-RING_UBOX~zf-B_box~PRY	1				1
PF00013_PF12235_PF16096	KH_1~FXMRP1_C_core~FXR_C1	1					1
PF02023_PF13912_PF00096	SCAN~zf-C2H2_6~zf-C2H2	1					1
PF07686_PF08205_PF13765	V-set~C2-set_2~PRY	1					1
PF00413_PF00045_PF11857	Peptidase_M10~Hemopexin~DUF3377		1	1	1	1	1
PF00397_PF15410_PF00620	WW~PH_9~RhoGAP		1	1	1	1
PF16863_PF01055_PF00088	NtCtMGAM_N~Glyco_hydro_31~Trefoil		1	1	1
PF00054_PF00008_PF02210	Laminin_G_1~EGF~Laminin_G_2		1	1
PF00690_PF00122_PF13246	Cation_ATPase_N~E1-E2_ATPase~Cation_ATPase		1	1
PF13271_PF05729_PF00400	DUF4062~NACHT~WD40		1	1
PF07679_PF01825_PF00002	I-set~GPS~7tm_2		1		1	1	1
PF07647_PF00536_PF00640	SAM_2~SAM_1~PID		1		1
PF13873_PF14523_PF05739	Myb_DNA-bind_5~Syntaxin_2~SNARE		1		1
PF13639_PF00612_PF14634	zf-RING_2~IQ~zf-RING_5		1			1
PF00023_PF12796_PF13637	Ank~Ank_2~Ank_4		1				1
PF00090_PF16489_PF00002	TSP_1~GAIN~7tm_2		1				1
PF00621_PF00168_PF00620	RhoGEF~C2~RhoGAP		1				1
PF00757_PF01030_PF07714	Furin-like~Recep_L_domain~Pkinase_Tyr		1				1
PF04851_PF00271_PF16783	ResIII~Helicase_C~FANCM-MHF_bd			1	1
PF16209_PF00702_PF16212	PhoLip_ATPase_N~Hydrolase~PhoLip_ATPase_C			1	1
PF00024_PF14295_PF00089	PAN_1~PAN_4~Trypsin			1			1
PF00168_PF00069_PF00433	C2~Pkinase~Pkinase_C			1			1
PF13445_PF00643_PF01436	zf-RING_UBOX~zf-B_box~NHL			1			1
PF16209_PF00122_PF16212	PhoLip_ATPase_N~E1-E2_ATPase~PhoLip_ATPase_C			1			1
PF04055_PF13353_PF06463	Radical_SAM~Fer4_12~Mob_synth_C				1	1	1
PF07645_PF12662_PF00093	EGF_CA~cEGF~VWC				1	1	1
PF00069_PF12796_PF00023	Pkinase~Ank_2~Ank				1	1
PF00133_PF08264_PF06827	tRNA-synt_1~Anticodon_1~zf-FPG_IleRS				1	1
PF07686_PF08205_PF00622	V-set~C2-set_2~SPRY				1	1
PF12796_PF13637_PF00531	Ank_2~Ank_4~Death				1	1
PF00515_PF13414_PF07719	TPR_1~TPR_11~TPR_2				1		1
PF13637_PF12796_PF00536	Ank_4~Ank_2~SAM_1				1		1
PF13857_PF12796_PF13637	Ank_5~Ank_2~Ank_4				1		1
PF00018_PF00791_PF07653	SH3_1~ZU5~SH3_2					1	1
PF12796_PF13857_PF02205	Ank_2~Ank_5~WH2					1	1

## Sheet: S3D-domain complexity index >=4
Table S3D- List showing the number of proteins in a proteome with a specific functional domain combination (complexity index >=4): Highlighted in green are domain combinations specific to any one Afrotherian species.
Domain combinations	Domain description	L. africana	T. manatus	O. afer	C. asiatica	E. edwardii	E. telfairi	H. sapiens	M. musculus	E. caballus	B. taurus
PF00008_PF02210_PF02793_PF16489_PF01825_PF00002	EGF~Laminin_G_2~HRM~GAIN~GPS~7tm_2	1
PF00028_PF00008_PF02210_PF00053_PF02793_PF16489_PF01825_PF00002_PF01740	Cadherin~EGF~Laminin_G_2~Laminin_EGF~HRM~GAIN~GPS~7tm_2~STAS	1
PF00055_PF00053_PF00052_PF02210	Laminin_N~Laminin_EGF~Laminin_B~Laminin_G_2	1
PF00057_PF07679_PF00052_PF00053_PF13927_PF13895_PF00054_PF00008_PF02210	Ldl_recept_a~I-set~Laminin_B~Laminin_EGF~Ig_3~Ig_2~Laminin_G_1~EGF~Laminin_G_2	1
PF00059_PF02140_PF02010_PF01825_PF01477	Lectin_C~Gal_Lectin~REJ~GPS~PLAT	1
PF00069_PF13589_PF01119_PF08676	Pkinase~HATPase_c_3~DNA_mis_repair~MutL_C	1
PF00093_PF00090_PF12947_PF02412_PF05735	VWC~TSP_1~EGF_3~TSP_3~TSP_C	1
PF00169_PF01412_PF00620_PF00788	PH~ArfGap~RhoGAP~RA	1
PF00207_PF07678_PF07677_PF01759	A2M~A2M_comp~A2M_recep~NTR	1
PF00225_PF16183_PF12423_PF12473_PF00169	Kinesin~Kinesin_assoc~KIF1B~DUF3694~PH	1
PF00289_PF02786_PF02785_PF00682_PF00364	Biotin_carb_N~CPSase_L_D2~Biotin_carb_C~HMGL-like~Biotin_lipoyl	1
PF00431_PF13964_PF01344_PF00059_PF01437	CUB~Kelch_6~Kelch_1~Lectin_C~PSI	1
PF00569_PF06701_PF12796_PF13920	ZZ~MIB_HERC2~Ank_2~zf-C3HC4_3	1
PF00628_PF00385_PF00176_PF00271_PF06465_PF06461_PF08074	PHD~Chromo~SNF2_N~Helicase_C~DUF1087~DUF1086~CHDCT2	1
PF00651_PF07707_PF01344_PF13964_PF13418	BTB~BACK~Kelch_1~Kelch_6~Kelch_4	1
PF00702_PF12409_PF00690_PF00122	Hydrolase~P5-ATPase~Cation_ATPase_N~E1-E2_ATPase	1
PF00817_PF11799_PF14377_PF16727	IMS~IMS_C~DUF4414~REV1_C	1
PF01138_PF03725_PF03726_PF00575	RNase_PH~RNase_PH_C~PNPase~S1	1
PF01352_PF04218_PF03221_PF03184	KRAB~CENP-B_N~HTH_Tnp_Tc5~DDE_1	1
PF01352_PF13912_PF00096_PF13894	KRAB~zf-C2H2_6~zf-C2H2~zf-C2H2_4	1
PF01388_PF00628_PF02373_PF02928_PF08429	ARID~PHD~JmjC~zf-C5HC2~PLU-1	1
PF01562_PF01421_PF00090_PF08686	Pep_M12B_propep~Reprolysin~TSP_1~PLAC	1
PF01835_PF07703_PF01821_PF00207_PF07677	A2M_N~A2M_N_2~ANATO~A2M~A2M_recep	1
PF02008_PF00628_PF13771_PF05964_PF00856	zf-CXXC~PHD~zf-HC5HC2H~FYRN~SET	1
PF02192_PF00794_PF00792_PF00454	PI3K_p85B~PI3K_rbd~PI3K_C2~PI3_PI4_kinase	1
PF02204_PF00023_PF12796_PF13857	VPS9~Ank~Ank_2~Ank_5	1
PF03098_PF00036_PF08022_PF08030	An_peroxidase~EF-hand_1~FAD_binding_8~NAD_binding_6	1
PF03456_PF02141_PF12335_PF00169	uDENN~DENN~SBF2~PH	1
PF04505_PF00690_PF00122_PF00689	CD225~Cation_ATPase_N~E1-E2_ATPase~Cation_ATPase_C	1
PF05648_PF00092_PF01839_PF08441	PEX11~VWA~FG-GAP~Integrin_alpha2	1
PF06839_PF10237_PF12894_PF12896	zf-GRF~N6-adenineMlase~ANAPC4_WD40~ANAPC4	1
PF07645_PF00008_PF00066_PF06816_PF07684_PF13637_PF12796	EGF_CA~EGF~Notch~NOD~NODP~Ank_4~Ank_2	1
PF07648_PF00050_PF00053_PF01390_PF00008_PF00054	Kazal_2~Kazal_1~Laminin_EGF~SEA~EGF~Laminin_G_1	1
PF07679_PF00041_PF00621_PF00169	I-set~fn3~RhoGEF~PH	1
PF08409_PF07719_PF13424_PF14559_PF13432	DUF1736~TPR_2~TPR_12~TPR_19~TPR_16	1
PF11971_PF00621_PF00130_PF07653_PF00017_PF00018	CAMSAP_CH~RhoGEF~C1_1~SH3_2~SH2~SH3_1	1
PF12409_PF00690_PF00122_PF00702_PF00689	P5-ATPase~Cation_ATPase_N~E1-E2_ATPase~Hydrolase~Cation_ATPase_C	1
PF12763_PF14604_PF16617_PF00018	EF-hand_4~SH3_9~INTAP~SH3_1	1
PF13330_PF00094_PF08742_PF00093	Mucin2_WxxW~VWD~C8~VWC	1
PF13418_PF07646_PF01344_PF06102	Kelch_4~Kelch_2~Kelch_1~DUF947	1
PF17205_PF00362_PF03160_PF00041	PSI_integrin~Integrin_beta~Calx-beta~fn3	1
PF00008_PF07645_PF12661_PF00066_PF06816_PF07684_PF12796	EGF~EGF_CA~hEGF~Notch~NOD~NODP~Ank_2		1
PF00055_PF00053_PF06009_PF00054	Laminin_N~Laminin_EGF~Laminin_II~Laminin_G_1		1
PF00057_PF07679_PF00052_PF00053_PF13927_PF13895_PF00054_PF00008	Ldl_recept_a~I-set~Laminin_B~Laminin_EGF~Ig_3~Ig_2~Laminin_G_1~EGF		1
PF00059_PF14670_PF12662_PF07645	Lectin_C~FXa_inhibition~cEGF~EGF_CA		1
PF00094_PF08742_PF01826_PF05375_PF00057_PF00090_PF00754_PF00093	VWD~C8~TIL~Pacifastin_I~Ldl_recept_a~TSP_1~F5_F8_type_C~VWC		1
PF00595_PF00615_PF16613_PF02196	PDZ~RGS~RGS12_us1~RBD		1
PF00617_PF00388_PF00387_PF00788	RasGEF~PI-PLC-X~PI-PLC-Y~RA		1
PF00650_PF00435_PF00621_PF00018_PF16609_PF00169_PF07679_PF00069	CRAL_TRIO~Spectrin~RhoGEF~SH3_1~SH3-RhoG_link~PH~I-set~Pkinase		1
PF00650_PF00435_PF00621_PF00169_PF00018_PF16609	CRAL_TRIO~Spectrin~RhoGEF~PH~SH3_1~SH3-RhoG_link		1
PF00749_PF00458_PF00587_PF03129_PF09180	tRNA-synt_1c~WHEP-TRS~tRNA-synt_2b~HGTP_anticodon~ProRS-C_1		1
PF01315_PF02738_PF00941_PF01799_PF03450	Ald_Xan_dh_C~Ald_Xan_dh_C2~FAD_binding_5~Fer2_2~CO_deh_flav_C		1
PF01352_PF00096_PF13912_PF13894	KRAB~zf-C2H2~zf-C2H2_6~zf-C2H2_4		1
PF01404_PF07699_PF00041_PF07714_PF00536	Ephrin_lbd~Ephrin_rec_like~fn3~Pkinase_Tyr~SAM_1		1
PF01562_PF13688_PF00090_PF05986	Pep_M12B_propep~Reprolysin_5~TSP_1~ADAM_spacer1		1
PF07686_PF13895_PF07679_PF13927	V-set~Ig_2~I-set~Ig_3		1
PF08072_PF16204_PF00270_PF00271_PF16124	BDHCT~BDHCT_assoc~DEAD~Helicase_C~RecQ_Zn_bind		1
PF08385_PF08393_PF12774_PF07728_PF12780_PF12777_PF12781_PF03028	DHC_N1~DHC_N2~AAA_6~AAA_5~AAA_8~MT~AAA_9~Dynein_heavy		1
PF08393_PF12774_PF12775_PF12777_PF12781	DHC_N2~AAA_6~AAA_7~MT~AAA_9		1
PF08709_PF02815_PF01365_PF00622_PF02026_PF08454_PF13833_PF06459	Ins145_P3_rec~MIR~RYDR_ITPR~SPRY~RyR~RIH_assoc~EF-hand_8~RR_TM4-6		1
PF09169_PF09103_PF09121_PF09104	BRCA-2_helical~BRCA-2_OB1~Tower~BRCA-2_OB3		1
PF09379_PF00373_PF08736_PF05902	FERM_N~FERM_M~FA~4_1_CTD		1
PF09379_PF00373_PF09380_PF04382	FERM_N~FERM_M~FERM_C~SAB		1
PF11971_PF00169_PF00130_PF07653_PF00017_PF00018	CAMSAP_CH~PH~C1_1~SH3_2~SH2~SH3_1		1
PF12796_PF00023_PF00791_PF00531	Ank_2~Ank~ZU5~Death		1
PF12796_PF08477_PF16095_PF00069	Ank_2~Roc~COR~Pkinase		1
PF13385_PF00055_PF00053_PF00041	Laminin_G_3~Laminin_N~Laminin_EGF~fn3		1
PF13385_PF15787_PF14844_PF02138	Laminin_G_3~DUF4704~PH_BEACH~Beach		1
PF13855_PF16920_PF00047_PF07679_PF07714	LRR_8~TPKR_C2~ig~I-set~Pkinase_Tyr		1
PF13927_PF07679_PF16625_PF00041	Ig_3~I-set~ISET-FN3_linker~fn3		1
PF16472_PF07645_PF14670_PF00058	DUF5050~EGF_CA~FXa_inhibition~Ldl_recept_b		1
PF16689_PF11414_PF00514_PF05924	APC_N_CC~Suppressor_APC~Arm~SAMP		1
PF17101_PF11380_PF00066_PF06464_PF17102_PF17103_PF04803	Stealth_CR1~Stealth_CR2~Notch~DMAP_binding~Stealth_CR3~Stealth_CR4~Cor1		1
PF02093_PF00077_PF00078_PF00075	Gag_p30~RVP~RVT_1~RNase_H			4
PF02093_PF00077_PF00078_PF00075_PF09337	Gag_p30~RVP~RVT_1~RNase_H~zf-H2C2			2
PF02093_PF00077_PF00078_PF00075_PF09337_PF00665	Gag_p30~RVP~RVT_1~RNase_H~zf-H2C2~rve			2
PF00008_PF07645_PF12661_PF00066_PF07684_PF12796_PF13637	EGF~EGF_CA~hEGF~Notch~NODP~Ank_2~Ank_4			1
PF00028_PF07645_PF00008_PF02210	Cadherin~EGF_CA~EGF~Laminin_G_2			1
PF00057_PF07645_PF00058_PF14670_PF12662	Ldl_recept_a~EGF_CA~Ldl_recept_b~FXa_inhibition~cEGF			1
PF00059_PF02010_PF01825_PF01477_PF08016	Lectin_C~REJ~GPS~PLAT~PKD_channel			1
PF00063_PF00784_PF14604_PF00373	Myosin_head~MyTH4~SH3_9~FERM_M			1
PF00077_PF00078_PF00075_PF09337	RVP~RVT_1~RNase_H~zf-H2C2			1
PF00077_PF00078_PF00075_PF09337_PF00665	RVP~RVT_1~RNase_H~zf-H2C2~rve			1
PF00078_PF00075_PF09337_PF00429	RVT_1~RNase_H~zf-H2C2~TLV_coat			1
PF00094_PF01826_PF08742_PF13330_PF00093	VWD~TIL~C8~Mucin2_WxxW~VWC			1
PF00225_PF16183_PF12423_PF00169	Kinesin~Kinesin_assoc~KIF1B~PH			1
PF00307_PF00435_PF09068_PF09069	CH~Spectrin~EF-hand_2~EF-hand_3			1
PF00387_PF00168_PF06631_PF08703	PI-PLC-Y~C2~DUF1154~PLC-beta_C			1
PF00621_PF03114_PF07653_PF00018	RhoGEF~BAR~SH3_2~SH3_1			1
PF01140_PF02093_PF00077_PF00078_PF00075	Gag_MA~Gag_p30~RVP~RVT_1~RNase_H			1
PF01140_PF02093_PF00077_PF00078_PF00075_PF09337	Gag_MA~Gag_p30~RVP~RVT_1~RNase_H~zf-H2C2			1
PF01140_PF02093_PF00077_PF00078_PF00075_PF09337_PF00665	Gag_MA~Gag_p30~RVP~RVT_1~RNase_H~zf-H2C2~rve			1
PF01390_PF07679_PF00047_PF01825_PF00002	SEA~I-set~ig~GPS~7tm_2			1
PF01421_PF00200_PF08516_PF07974	Reprolysin~Disintegrin~ADAM_CR~EGF_2			1
PF01462_PF13855_PF01463_PF00008_PF12661_PF02210	LRRNT~LRR_8~LRRCT~EGF~hEGF~Laminin_G_2			1
PF01821_PF10569_PF07678_PF07677_PF01759	ANATO~Thiol-ester_cl~A2M_comp~A2M_recep~NTR			1
PF01835_PF01821_PF00207_PF10569_PF07678_PF07677_PF01759	A2M_N~ANATO~A2M~Thiol-ester_cl~A2M_comp~A2M_recep~NTR			1
PF01835_PF07703_PF00207_PF07678_PF07677	A2M_N~A2M_N_2~A2M~A2M_comp~A2M_recep			1
PF01835_PF07703_PF01821_PF00207_PF10569_PF07678	A2M_N~A2M_N_2~ANATO~A2M~Thiol-ester_cl~A2M_comp			1
PF02093_PF00078_PF00075_PF09337_PF00665	Gag_p30~RVT_1~RNase_H~zf-H2C2~rve			1
PF02210_PF00053_PF16489_PF01825_PF00002	Laminin_G_2~Laminin_EGF~GAIN~GPS~7tm_2			1
PF02761_PF02762_PF14447_PF00627	Cbl_N2~Cbl_N3~Prok-RING_4~UBA			1
PF06119_PF07474_PF07645_PF12947_PF00086_PF00058	NIDO~G2F~EGF_CA~EGF_3~Thyroglobulin_1~Ldl_recept_b			1
PF07647_PF00169_PF01412_PF00788	SAM_2~PH~ArfGap~RA			1
PF07679_PF13927_PF00041_PF13882	I-set~Ig_3~fn3~Bravo_FIGEY			1
PF07686_PF08205_PF13895_PF13927	V-set~C2-set_2~Ig_2~Ig_3			1
PF08385_PF12774_PF07728_PF12775_PF12780_PF12781_PF03028	DHC_N1~AAA_6~AAA_5~AAA_7~AAA_8~AAA_9~Dynein_heavy			1
PF08409_PF07719_PF13432_PF13424_PF14559_PF13414	DUF1736~TPR_2~TPR_16~TPR_12~TPR_19~TPR_11			1
PF08742_PF13330_PF00094_PF01826	C8~Mucin2_WxxW~VWD~TIL			1
PF09379_PF00373_PF09380_PF16599_PF00595	FERM_N~FERM_M~FERM_C~PTN13_u3~PDZ			1
PF09379_PF09380_PF00595_PF00102	FERM_N~FERM_C~PDZ~Y_phosphatase			1
PF12774_PF07728_PF12777_PF12781_PF03028	AAA_6~AAA_5~MT~AAA_9~Dynein_heavy			1
PF13385_PF00055_PF00053_PF00041_PF00054_PF02210	Laminin_G_3~Laminin_N~Laminin_EGF~fn3~Laminin_G_1~Laminin_G_2			1
PF13418_PF13854_PF01344_PF00651	Kelch_4~Kelch_5~Kelch_1~BTB			1
PF13855_PF13927_PF07679_PF00047	LRR_8~Ig_3~I-set~ig			1
PF16209_PF00122_PF13246_PF00702_PF16212_PF13908	PhoLip_ATPase_N~E1-E2_ATPase~Cation_ATPase~Hydrolase~PhoLip_ATPase_C~Shisa			1
PF16689_PF11414_PF00514_PF16629_PF05923_PF05924	APC_N_CC~Suppressor_APC~Arm~Arm_APC_u3~APC_r~SAMP			1
PF16920_PF00047_PF07679_PF07714	TPKR_C2~ig~I-set~Pkinase_Tyr			1
PF00057_PF14670_PF00058_PF12662_PF07645	Ldl_recept_a~FXa_inhibition~Ldl_recept_b~cEGF~EGF_CA				1
PF00125_PF00169_PF00618_PF00617	Histone~PH~RasGEF_N~RasGEF				1
PF00621_PF00169_PF00610_PF00595	RhoGEF~PH~DEP~PDZ				1
PF01835_PF07703_PF01821_PF07678_PF07677_PF01759	A2M_N~A2M_N_2~ANATO~A2M_comp~A2M_recep~NTR				1
PF02093_PF01140_PF00078_PF00075	Gag_p30~Gag_MA~RVT_1~RNase_H				1
PF02210_PF00093_PF07645_PF12947_PF12662	Laminin_G_2~VWC~EGF_CA~EGF_3~cEGF				1
PF03146_PF07648_PF00050_PF00053_PF01390_PF00054	NtA~Kazal_2~Kazal_1~Laminin_EGF~SEA~Laminin_G_1				1
PF06119_PF00008_PF12661_PF00041	NIDO~EGF~hEGF~fn3				1
PF07645_PF00008_PF00066_PF06816_PF07684_PF13857_PF12796	EGF_CA~EGF~Notch~NOD~NODP~Ank_5~Ank_2				1
PF07645_PF00008_PF12661_PF00066_PF06816_PF07684_PF12796_PF11936	EGF_CA~EGF~hEGF~Notch~NOD~NODP~Ank_2~DUF3454				1
PF07648_PF00086_PF16597_PF10591	Kazal_2~Thyroglobulin_1~Thyroglob_assoc~SPARC_Ca_bdg				1
PF07686_PF08205_PF13927_PF13895_PF00047	V-set~C2-set_2~Ig_3~Ig_2~ig				1
PF08073_PF00628_PF00385_PF00176_PF00271_PF06465	CHDNT~PHD~Chromo~SNF2_N~Helicase_C~DUF1087				1
PF08742_PF00094_PF01826_PF00090	C8~VWD~TIL~TSP_1				1
PF09060_PF00595_PF07653_PF00625	L27_N~PDZ~SH3_2~Guanylate_kin				1
PF12774_PF07728_PF12775_PF03028	AAA_6~AAA_5~AAA_7~Dynein_heavy				1
PF12796_PF05033_PF00856_PF04515	Ank_2~Pre-SET~SET~Choline_transpo				1
PF12796_PF07738_PF06701_PF00632	Ank_2~Sad1_UNC~MIB_HERC2~HECT				1
PF12947_PF02469_PF00193_PF03223	EGF_3~Fasciclin~Xlink~V-ATPase_C				1
PF12947_PF12662_PF14670_PF07699_PF00431	EGF_3~cEGF~FXa_inhibition~Ephrin_rec_like~CUB				1
PF13385_PF00053_PF00054_PF00041	Laminin_G_3~Laminin_EGF~Laminin_G_1~fn3				1
PF13927_PF13895_PF07679_PF07714	Ig_3~Ig_2~I-set~Pkinase_Tyr				1
PF14666_PF14663_PF14668_PF14665	RICTOR_M~RasGEF_N_2~RICTOR_V~RICTOR_phospho				1
PF16209_PF00122_PF13246_PF16212_PF00618	PhoLip_ATPase_N~E1-E2_ATPase~Cation_ATPase~PhoLip_ATPase_C~RasGEF_N				1
PF00028_PF07645_PF02210_PF00008	Cadherin~EGF_CA~Laminin_G_2~EGF					1
PF00057_PF13927_PF00052_PF00053_PF07679_PF00054_PF00008_PF02210	Ldl_recept_a~Ig_3~Laminin_B~Laminin_EGF~I-set~Laminin_G_1~EGF~Laminin_G_2					1
PF00076_PF16209_PF00122_PF13246_PF16212	RRM_1~PhoLip_ATPase_N~E1-E2_ATPase~Cation_ATPase~PhoLip_ATPase_C					1
PF00092_PF07699_PF00084_PF02494_PF00008_PF00354_PF07645	VWA~Ephrin_rec_like~Sushi~HYR~EGF~Pentaxin~EGF_CA					1
PF00093_PF07645_PF12947_PF07974	VWC~EGF_CA~EGF_3~EGF_2					1
PF00210_PF00754_PF00246_PF13620	Ferritin~F5_F8_type_C~Peptidase_M14~CarboxypepD_reg					1
PF00270_PF00271_PF16783_PF02732	DEAD~Helicase_C~FANCM-MHF_bd~ERCC4					1
PF00594_PF00008_PF07645_PF00054_PF02210	Gla~EGF~EGF_CA~Laminin_G_1~Laminin_G_2					1
PF00594_PF00008_PF12662_PF00054_PF02210	Gla~EGF~cEGF~Laminin_G_1~Laminin_G_2					1
PF00917_PF00443_PF12436_PF02135	MATH~UCH~USP7_ICP0_bdg~zf-TAZ					1
PF01092_PF07645_PF01825_PF00002	Ribosomal_S6e~EGF_CA~GPS~7tm_2					1
PF01390_PF00057_PF00431_PF00629_PF00089	SEA~Ldl_recept_a~CUB~MAM~Trypsin					1
PF01462_PF13855_PF00008_PF00054	LRRNT~LRR_8~EGF~Laminin_G_1					1
PF01835_PF01821_PF07703_PF00207_PF07678_PF07677_PF01759	A2M_N~ANATO~A2M_N_2~A2M~A2M_comp~A2M_recep~NTR					1
PF02135_PF02172_PF00439_PF06001_PF00569	zf-TAZ~KIX~Bromodomain~DUF902~ZZ					1
PF02192_PF00794_PF00792_PF00613	PI3K_p85B~PI3K_rbd~PI3K_C2~PI3Ka					1
PF04997_PF00623_PF04983_PF05000	RNA_pol_Rpb1_1~RNA_pol_Rpb1_2~RNA_pol_Rpb1_3~RNA_pol_Rpb1_4					1
PF07531_PF05236_PF00271_PF13234_PF08148	TAFH~TAF4~Helicase_C~rRNA_proc-arch~DSHCT					1
PF07645_PF00008_PF00066_PF06816_PF07684_PF12796_PF13637	EGF_CA~EGF~Notch~NOD~NODP~Ank_2~Ank_4					1
PF07647_PF00169_PF01412_PF00620	SAM_2~PH~ArfGap~RhoGAP					1
PF07657_PF01414_PF00008_PF07645	MNNL~DSL~EGF~EGF_CA					1
PF09279_PF00388_PF00387_PF00168_PF06631_PF08703	EF-hand_like~PI-PLC-X~PI-PLC-Y~C2~DUF1154~PLC-beta_C					1
PF09379_PF00373_PF09380_PF08736_PF00595	FERM_N~FERM_M~FERM_C~FA~PDZ					1
PF10534_PF00595_PF06663_PF00169	CRIC_ras_sig~PDZ~DUF1170~PH					1
PF13771_PF00628_PF13832_PF05964_PF05965	zf-HC5HC2H~PHD~zf-HC5HC2H_2~FYRN~FYRC					1
PF13855_PF01822_PF00059_PF00801_PF02010_PF01477_PF08016	LRR_8~WSC~Lectin_C~PKD~REJ~PLAT~PKD_channel					1
PF13964_PF13418_PF07646_PF01344	Kelch_6~Kelch_4~Kelch_2~Kelch_1					1
PF15612_PF15613_PF00628_PF00439	WHIM1~WSD~PHD~Bromodomain					1
PF16496_PF04433_PF00249_PF16498	SWIRM-assoc_2~SWIRM~Myb_DNA-binding~SWIRM-assoc_3					1
PF16589_PF00817_PF11799_PF16727	BRCT_2~IMS~IMS_C~REV1_C					1
PF16689_PF11414_PF00514_PF05923_PF05924	APC_N_CC~Suppressor_APC~Arm~APC_r~SAMP					1
PF16689_PF11414_PF00514_PF16629_PF05972_PF16630_PF05923_PF16633_PF05924_PF16634_PF16635_PF16636_PF05956	APC_N_CC~Suppressor_APC~Arm~Arm_APC_u3~APC_15aa~APC_u5~APC_r~APC_u9~SAMP~APC_u13~APC_u14~APC_u15~APC_basic					1
PF00130_PF00781_PF00609_PF07647	C1_1~DAGK_cat~DAGK_acc~SAM_2						2
PF00008_PF07645_PF00066_PF06816_PF07684_PF13857_PF12796_PF11936	EGF~EGF_CA~Notch~NOD~NODP~Ank_5~Ank_2~DUF3454						1
PF00018_PF00017_PF00169_PF00168	SH3_1~SH2~PH~C2						1
PF00018_PF14604_PF00621_PF03114	SH3_1~SH3_9~RhoGEF~BAR						1
PF00035_PF00271_PF04408_PF07717	dsrm~Helicase_C~HA2~OB_NTP_bind						1
PF00040_PF00008_PF00051_PF00089	fn2~EGF~Kringle~Trypsin						1
PF00047_PF07679_PF00041_PF13882	ig~I-set~fn3~Bravo_FIGEY						1
PF00057_PF00058_PF14670_PF07645_PF16472_PF12662	Ldl_recept_a~Ldl_recept_b~FXa_inhibition~EGF_CA~DUF5050~cEGF						1
PF00057_PF01823_PF00090_PF00084	Ldl_recept_a~MACPF~TSP_1~Sushi						1
PF00059_PF12662_PF09064_PF07645	Lectin_C~cEGF~Tme5_EGF_like~EGF_CA						1
PF00063_PF00612_PF00784_PF07653_PF00373	Myosin_head~IQ~MyTH4~SH3_2~FERM_M						1
PF00063_PF07653_PF00784_PF00373	Myosin_head~SH3_2~MyTH4~FERM_M						1
PF00090_PF00014_PF07679_PF08686	TSP_1~Kunitz_BPTI~I-set~PLAC						1
PF00094_PF08742_PF01826_PF00057_PF00090	VWD~C8~TIL~Ldl_recept_a~TSP_1						1
PF00109_PF02801_PF16197_PF00698_PF14765_PF00550_PF00975	ketoacyl-synt~Ketoacyl-synt_C~KAsynt_C_assoc~Acyl_transf_1~PS-DH~PP-binding~Thioesterase						1
PF00207_PF10569_PF07678_PF07677_PF01835_PF07703	A2M~Thiol-ester_cl~A2M_comp~A2M_recep~A2M_N~A2M_N_2						1
PF00225_PF00498_PF12473_PF01302	Kinesin~FHA~DUF3694~CAP_GLY						1
PF00289_PF02786_PF02785_PF00364_PF01039	Biotin_carb_N~CPSase_L_D2~Biotin_carb_C~Biotin_lipoyl~Carboxyl_trans						1
PF00373_PF09380_PF08736_PF00621_PF00169	FERM_M~FERM_C~FA~RhoGEF~PH						1
PF00435_PF00621_PF00169_PF00018_PF16609_PF07679_PF00069	Spectrin~RhoGEF~PH~SH3_1~SH3-RhoG_link~I-set~Pkinase						1
PF00520_PF11933_PF06512_PF16905	Ion_trans~Na_trans_cytopl~Na_trans_assoc~GPHH						1
PF00628_PF13832_PF05964_PF05965_PF00856	PHD~zf-HC5HC2H_2~FYRN~FYRC~SET						1
PF00650_PF00435_PF00621_PF00018_PF16609_PF07679_PF00069	CRAL_TRIO~Spectrin~RhoGEF~SH3_1~SH3-RhoG_link~I-set~Pkinase						1
PF00690_PF00122_PF13246_PF00702_PF12424	Cation_ATPase_N~E1-E2_ATPase~Cation_ATPase~Hydrolase~ATP_Ca_trans_C						1
PF00692_PF00077_PF00078_PF00075_PF02022	dUTPase~RVP~RVT_1~RNase_H~Integrase_Zn						1
PF00787_PF00018_PF14604_PF16621	PX~SH3_1~SH3_9~NECFESHC						1
PF00794_PF00792_PF00613_PF00787_PF00168	PI3K_rbd~PI3K_C2~PI3Ka~PX~C2						1
PF01140_PF02093_PF00077_PF00078_PF00075_PF00665	Gag_MA~Gag_p30~RVP~RVT_1~RNase_H~rve						1
PF01390_PF00047_PF01825_PF00002	SEA~ig~GPS~7tm_2						1
PF01414_PF00008_PF07645_PF12661_PF07974	DSL~EGF~EGF_CA~hEGF~EGF_2						1
PF01562_PF01421_PF00200_PF06294	Pep_M12B_propep~Reprolysin~Disintegrin~CH_2						1
PF01749_PF00514_PF13513_PF16186	IBB~Arm~HEAT_EZ~Arm_3						1
PF01835_PF07703_PF00207_PF10569_PF07678_PF07677_PF01759	A2M_N~A2M_N_2~A2M~Thiol-ester_cl~A2M_comp~A2M_recep~NTR						1
PF02210_PF00093_PF00090_PF02412_PF05735	Laminin_G_2~VWC~TSP_1~TSP_3~TSP_C						1
PF04811_PF08033_PF04815_PF00626	Sec23_trunk~Sec23_BS~Sec23_helical~Gelsolin						1
PF04979_PF16746_PF00169_PF01412_PF12796	IPP-2~BAR_3~PH~ArfGap~Ank_2						1
PF04997_PF00623_PF05000_PF04998	RNA_pol_Rpb1_1~RNA_pol_Rpb1_2~RNA_pol_Rpb1_4~RNA_pol_Rpb1_5						1
PF06119_PF07474_PF12947_PF07645_PF12662_PF00086_PF00058	NIDO~G2F~EGF_3~EGF_CA~cEGF~Thyroglobulin_1~Ldl_recept_b						1
PF07645_PF00008_PF00066_PF07684_PF12796_PF13637	EGF_CA~EGF~Notch~NODP~Ank_2~Ank_4						1
PF07645_PF00008_PF14670_PF00058	EGF_CA~EGF~FXa_inhibition~Ldl_recept_b						1
PF07686_PF13927_PF13895_PF07679	V-set~Ig_3~Ig_2~I-set						1
PF08071_PF01479_PF00900_PF00467	RS4NT~S4~Ribosomal_S4e~KOW						1
PF08073_PF00628_PF00385_PF00271_PF06465_PF06461_PF08074	CHDNT~PHD~Chromo~Helicase_C~DUF1087~DUF1086~CHDCT2						1
PF08151_PF00168_PF08150_PF16165	FerI~C2~FerB~Ferlin_C						1
PF08385_PF08393_PF07728_PF12775_PF12780_PF12777_PF12781_PF03028	DHC_N1~DHC_N2~AAA_5~AAA_7~AAA_8~MT~AAA_9~Dynein_heavy						1
PF08385_PF08393_PF12774_PF07728_PF12775_PF12780_PF12781_PF03028	DHC_N1~DHC_N2~AAA_6~AAA_5~AAA_7~AAA_8~AAA_9~Dynein_heavy						1
PF08409_PF07719_PF13432_PF14559	DUF1736~TPR_2~TPR_16~TPR_19						1
PF08709_PF02815_PF01365_PF00622_PF02026_PF13833_PF06459_PF00520	Ins145_P3_rec~MIR~RYDR_ITPR~SPRY~RyR~EF-hand_8~RR_TM4-6~Ion_trans						1
PF12409_PF00122_PF00702_PF00689	P5-ATPase~E1-E2_ATPase~Hydrolase~Cation_ATPase_C						1
PF12796_PF07653_PF00595_PF00536	Ank_2~SH3_2~PDZ~SAM_1						1
PF12796_PF13606_PF13637_PF00791_PF00531	Ank_2~Ank_3~Ank_4~ZU5~Death						1
PF12796_PF13637_PF07653_PF16907_PF16632	Ank_2~Ank_4~SH3_2~Caskin-Pro-rich~Caskin-tail						1
PF12947_PF12662_PF14670_PF07645	EGF_3~cEGF~FXa_inhibition~EGF_CA						1
PF13385_PF15787_PF06469_PF02138	Laminin_G_3~DUF4704~DUF1088~Beach						1
PF13540_PF00415_PF08005_PF00630_PF08239_PF03256_PF13639	RCC1_2~RCC1~PHR~Filamin~SH3_3~ANAPC10~zf-RING_2						1
PF13854_PF13418_PF00059_PF01437	Kelch_5~Kelch_4~Lectin_C~PSI						1
PF13855_PF01462_PF00008_PF12661_PF00054	LRR_8~LRRNT~EGF~hEGF~Laminin_G_1						1
PF13855_PF07679_PF13927_PF00047	LRR_8~I-set~Ig_3~ig						1
PF13855_PF16920_PF00047_PF07679	LRR_8~TPKR_C2~ig~I-set						1
PF13927_PF07679_PF00041_PF00102	Ig_3~I-set~fn3~Y_phosphatase						1
PF13927_PF07679_PF00047_PF07474_PF12662_PF07645	Ig_3~I-set~ig~G2F~cEGF~EGF_CA						1
PF13927_PF13895_PF07679_PF00041	Ig_3~Ig_2~I-set~fn3						1
PF14836_PF08709_PF02815_PF01365_PF08454_PF00520	Ubiquitin_3~Ins145_P3_rec~MIR~RYDR_ITPR~RIH_assoc~Ion_trans						1
PF15372_PF00010_PF03607_PF00069	DUF4600~HLH~DCX~Pkinase						1
PF16511_PF12796_PF07653_PF00595	FERM_f0~Ank_2~SH3_2~PDZ						1
PF16735_PF00169_PF00784_PF00373	MYO10_CC~PH~MyTH4~FERM_M						1
PF17101_PF11380_PF00066_PF17102_PF17103	Stealth_CR1~Stealth_CR2~Notch~Stealth_CR3~Stealth_CR4						1
PF00057_PF00431_PF00629_PF15494_PF00089	Ldl_recept_a~CUB~MAM~SRCR_2~Trypsin							1
PF00057_PF13927_PF00052_PF00053_PF07679_PF13895_PF00054_PF00008	Ldl_recept_a~Ig_3~Laminin_B~Laminin_EGF~I-set~Ig_2~Laminin_G_1~EGF							1
PF00059_PF14670_PF12662_PF09064	Lectin_C~FXa_inhibition~cEGF~Tme5_EGF_like							1
PF00090_PF13927_PF07679_PF08686	TSP_1~Ig_3~I-set~PLAC							1
PF00092_PF14670_PF07645_PF12662_PF10393	VWA~FXa_inhibition~EGF_CA~cEGF~Matrilin_ccoil							1
PF00176_PF00271_PF00641_PF01844	SNF2_N~Helicase_C~zf-RanBP~HNH							1
PF00370_PF02782_PF00077_PF01585	FGGY_N~FGGY_C~RVP~G-patch							1
PF00412_PF00595_PF00069_PF05361	LIM~PDZ~Pkinase~PP1_inhibitor							1
PF00569_PF06701_PF12796_PF13637_PF13920	ZZ~MIB_HERC2~Ank_2~Ank_4~zf-C3HC4_3							1
PF00650_PF00435_PF00621_PF00169_PF16609_PF07679_PF00041_PF00069	CRAL_TRIO~Spectrin~RhoGEF~PH~SH3-RhoG_link~I-set~fn3~Pkinase							1
PF00794_PF00792_PF00613_PF00454_PF00787	PI3K_rbd~PI3K_C2~PI3Ka~PI3_PI4_kinase~PX							1
PF02758_PF05729_PF13516_PF13553_PF00619	PYRIN~NACHT~LRR_6~FIIND~CARD							1
PF07645_PF00008_PF00066_PF07684_PF12796	EGF_CA~EGF~Notch~NODP~Ank_2							1
PF07645_PF00058_PF14670_PF00008	EGF_CA~Ldl_recept_b~FXa_inhibition~EGF							1
PF07645_PF12662_PF01825_PF00002	EGF_CA~cEGF~GPS~7tm_2							1
PF07679_PF00090_PF00791_PF17217	I-set~TSP_1~ZU5~UPA							1
PF07686_PF08205_PF13927_PF00041	V-set~C2-set_2~Ig_3~fn3							1
PF07707_PF13964_PF01344_PF13415	BACK~Kelch_6~Kelch_1~Kelch_3							1
PF12624_PF16908_PF16910_PF00627_PF06650_PF16909	Chorein_N~VPS13~VPS13_mid_rpt~UBA~SHR-BD~VPS13_C							1
PF12796_PF00023_PF13606_PF13637_PF13857_PF07647_PF00644	Ank_2~Ank~Ank_3~Ank_4~Ank_5~SAM_2~PARP							1
PF13405_PF01794_PF08022_PF08030	EF-hand_6~Ferric_reduct~FAD_binding_8~NAD_binding_6							1
PF13445_PF00643_PF15227_PF00622	zf-RING_UBOX~zf-B_box~zf-C3HC4_4~SPRY							1
PF13445_PF07653_PF00018_PF14604	zf-RING_UBOX~SH3_2~SH3_1~SH3_9							1
PF13716_PF00435_PF00621_PF00169_PF07653	CRAL_TRIO_2~Spectrin~RhoGEF~PH~SH3_2							1
PF13895_PF13927_PF07679_PF00041	Ig_2~Ig_3~I-set~fn3							1
PF13895_PF13927_PF07679_PF00041_PF06583	Ig_2~Ig_3~I-set~fn3~Neogenin_C							1
PF15227_PF00643_PF13765_PF04032	zf-C3HC4_4~zf-B_box~PRY~Rpr2							1
PF15787_PF16057_PF14844_PF02138_PF00400	DUF4704~DUF4800~PH_BEACH~Beach~WD40							1
PF16457_PF09279_PF00388_PF00387	PH_12~EF-hand_like~PI-PLC-X~PI-PLC-Y							1
PF00008_PF07645_PF00066_PF07684_PF12796_PF13857	EGF~EGF_CA~Notch~NODP~Ank_2~Ank_5								1
PF00057_PF07679_PF00052_PF00053_PF13927_PF00054_PF00008	Ldl_recept_a~I-set~Laminin_B~Laminin_EGF~Ig_3~Laminin_G_1~EGF								1
PF00090_PF05986_PF00014_PF16626_PF00047_PF13927_PF07679_PF08686	TSP_1~ADAM_spacer1~Kunitz_BPTI~Papilin_u7~ig~Ig_3~I-set~PLAC								1
PF00092_PF07699_PF00084_PF02494_PF00008_PF07645_PF00354	VWA~Ephrin_rec_like~Sushi~HYR~EGF~EGF_CA~Pentaxin								1
PF00092_PF12662_PF14670_PF10393	VWA~cEGF~FXa_inhibition~Matrilin_ccoil								1
PF00431_PF07974_PF13854_PF13418_PF00059_PF01437	CUB~EGF_2~Kelch_5~Kelch_4~Lectin_C~PSI								1
PF00619_PF00931_PF00400_PF12894	CARD~NB-ARC~WD40~ANAPC4_WD40								1
PF00629_PF01826_PF12714_PF00094	MAM~TIL~TILa~VWD								1
PF00690_PF00122_PF13246_PF00702_PF00689_PF12424	Cation_ATPase_N~E1-E2_ATPase~Cation_ATPase~Hydrolase~Cation_ATPase_C~ATP_Ca_trans_C								1
PF00989_PF14598_PF16665_PF08832_PF16279_PF08815_PF07469	PAS~PAS_11~NCOA_u2~SRC-1~DUF4927~Nuc_rec_co-act~DUF1518								1
PF01352_PF00096_PF13894_PF13912_PF12171	KRAB~zf-C2H2~zf-C2H2_4~zf-C2H2_6~zf-C2H2_jaz								1
PF01352_PF13894_PF00096_PF13912	KRAB~zf-C2H2_4~zf-C2H2~zf-C2H2_6								1
PF01352_PF13912_PF13465_PF00096	KRAB~zf-C2H2_6~zf-H2C2_2~zf-C2H2								1
PF01390_PF07679_PF00047_PF16489_PF01825_PF00002	SEA~I-set~ig~GAIN~GPS~7tm_2								1
PF01429_PF05033_PF00856_PF13771	MBD~Pre-SET~SET~zf-HC5HC2H								1
PF01462_PF13855_PF01463_PF13927_PF07679	LRRNT~LRR_8~LRRCT~Ig_3~I-set								1
PF02023_PF01352_PF16622_PF00096	SCAN~KRAB~zf-C2H2_11~zf-C2H2								1
PF06484_PF07974_PF05593_PF15636	Ten_N~EGF_2~RHS_repeat~Tox-GHH								1
PF07645_PF00008_PF00066_PF06816_PF07684_PF12796_PF11936	EGF_CA~EGF~Notch~NOD~NODP~Ank_2~DUF3454								1
PF07648_PF00530_PF00057_PF00089	Kazal_2~SRCR~Ldl_recept_a~Trypsin								1
PF07686_PF08205_PF13895_PF07679_PF00047	V-set~C2-set_2~Ig_2~I-set~ig								1
PF08409_PF13414_PF13432_PF13424_PF14559	DUF1736~TPR_11~TPR_16~TPR_12~TPR_19								1
PF08409_PF13432_PF13424_PF00515	DUF1736~TPR_16~TPR_12~TPR_1								1
PF11515_PF03256_PF00888_PF10557_PF01485	Cul7~ANAPC10~Cullin~Cullin_Nedd8~IBR								1
PF12662_PF07645_PF01825_PF00002	cEGF~EGF_CA~GPS~7tm_2								1
PF12662_PF14670_PF07645_PF07974	cEGF~FXa_inhibition~EGF_CA~EGF_2								1
PF12796_PF13606_PF13637_PF07525	Ank_2~Ank_3~Ank_4~SOCS_box								1
PF12796_PF13637_PF13857_PF02205	Ank_2~Ank_4~Ank_5~WH2								1
PF12796_PF13855_PF08477_PF16095_PF00069	Ank_2~LRR_8~Roc~COR~Pkinase								1
PF12796_PF13857_PF07724_PF10431	Ank_2~Ank_5~AAA_2~ClpB_D2-small								1
PF13540_PF00415_PF08005_PF00630_PF08239_PF13639	RCC1_2~RCC1~PHR~Filamin~SH3_3~zf-RING_2								1
PF13927_PF07679_PF00047_PF00041	Ig_3~I-set~ig~fn3								1
PF13927_PF07679_PF13895_PF00041_PF13882	Ig_3~I-set~Ig_2~fn3~Bravo_FIGEY								1
PF13927_PF13895_PF00041_PF07714	Ig_3~Ig_2~fn3~Pkinase_Tyr								1
PF14604_PF16618_PF00397_PF00169_PF00620	SH3_9~SH3-WW_linker~WW~PH~RhoGAP								1
PF16457_PF13499_PF00388_PF00387_PF00168	PH_12~EF-hand_7~PI-PLC-X~PI-PLC-Y~C2								1
PF16470_PF00082_PF01483_PF14843_PF15913	S8_pro-domain~Peptidase_S8~P_proprotein~GF_recep_IV~Furin-like_2								1
PF16589_PF00644_PF08487_PF13768_PF06346	BRCT_2~PARP~VIT~VWA_3~Drf_FH1								1
PF01352_PF00096_PF12171_PF13912	KRAB~zf-C2H2~zf-C2H2_jaz~zf-C2H2_6									2
PF00008_PF07645_PF12661_PF00066_PF07684_PF12796	EGF~EGF_CA~hEGF~Notch~NODP~Ank_2									1
PF00028_PF02210_PF00008_PF00053_PF02793_PF16489_PF01825_PF00002	Cadherin~Laminin_G_2~EGF~Laminin_EGF~HRM~GAIN~GPS~7tm_2									1
PF00129_PF07654_PF13765_PF00622	MHC_I~C1-set~PRY~SPRY									1
PF00168_PF08151_PF08165_PF08150	C2~FerI~FerA~FerB									1
PF00307_PF15949_PF13180_PF00412	CH~DUF4757~PDZ_2~LIM									1
PF00536_PF00169_PF01412_PF00620	SAM_1~PH~ArfGap~RhoGAP									1
PF00554_PF16179_PF00023_PF12796_PF00531	RHD_DNA_bind~RHD_dimer~Ank~Ank_2~Death									1
PF00651_PF07707_PF13415_PF13418	BTB~BACK~Kelch_3~Kelch_4									1
PF00651_PF07707_PF13964_PF01344_PF13418	BTB~BACK~Kelch_6~Kelch_1~Kelch_4									1
PF00787_PF00018_PF14604_PF16621_PF08944	PX~SH3_1~SH3_9~NECFESHC~p47_phox_C									1
PF01352_PF00096_PF13912_PF12171	KRAB~zf-C2H2~zf-C2H2_6~zf-C2H2_jaz									1
PF02204_PF13637_PF12796_PF13857	VPS9~Ank_4~Ank_2~Ank_5									1
PF03114_PF00090_PF07679_PF08686	BAR~TSP_1~I-set~PLAC									1
PF06701_PF00569_PF13637_PF13857_PF12796_PF13920	MIB_HERC2~ZZ~Ank_4~Ank_5~Ank_2~zf-C3HC4_3									1
PF07645_PF12662_PF14670_PF07699_PF00431	EGF_CA~cEGF~FXa_inhibition~Ephrin_rec_like~CUB									1
PF08071_PF01479_PF00900_PF16121	RS4NT~S4~Ribosomal_S4e~40S_S4_C									1
PF08409_PF13424_PF14559_PF13432	DUF1736~TPR_12~TPR_19~TPR_16									1
PF08614_PF00400_PF00339_PF02752	ATG16~WD40~Arrestin_N~Arrestin_C									1
PF08916_PF00169_PF00017_PF06658	Phe_ZIP~PH~SH2~DUF1168									1
PF12796_PF00023_PF13857_PF02205	Ank_2~Ank~Ank_5~WH2									1
PF13330_PF00094_PF08742_PF00007	Mucin2_WxxW~VWD~C8~Cys_knot									1
PF13540_PF00415_PF08005_PF08239_PF03256_PF13639	RCC1_2~RCC1~PHR~SH3_3~ANAPC10~zf-RING_2									1
PF13857_PF12796_PF13637_PF00023_PF00791_PF00531	Ank_5~Ank_2~Ank_4~Ank~ZU5~Death									1
PF16863_PF13802_PF01055_PF00088	NtCtMGAM_N~Gal_mutarotas_2~Glyco_hydro_31~Trefoil									1
PF00008_PF07645_PF12661_PF02210	EGF~EGF_CA~hEGF~Laminin_G_2										1
PF00040_PF00039_PF00051_PF00089	fn2~fn1~Kringle~Trypsin										1
PF00057_PF12662_PF16472_PF14670_PF07645_PF00058_PF00008	Ldl_recept_a~cEGF~DUF5050~FXa_inhibition~EGF_CA~Ldl_recept_b~EGF										1
PF00069_PF13857_PF12796_PF13637	Pkinase~Ank_5~Ank_2~Ank_4										1
PF00092_PF01391_PF00041_PF00014	VWA~Collagen~fn3~Kunitz_BPTI										1
PF00093_PF00090_PF12662_PF02412_PF05735	VWC~TSP_1~cEGF~TSP_3~TSP_C										1
PF00106_PF13452_PF01575_PF02036	adh_short~MaoC_dehydrat_N~MaoC_dehydratas~SCP2										1
PF00109_PF02801_PF16197_PF00698_PF14765_PF13489_PF00107_PF08659_PF00550_PF00975	ketoacyl-synt~Ketoacyl-synt_C~KAsynt_C_assoc~Acyl_transf_1~PS-DH~Methyltransf_23~ADH_zinc_N~KR~PP-binding~Thioesterase										1
PF00595_PF00615_PF16613_PF02196_PF16611_PF02188	PDZ~RGS~RGS12_us1~RBD~RGS12_us2~GoLoco										1
PF01352_PF00096_PF13894_PF13912	KRAB~zf-C2H2~zf-C2H2_4~zf-C2H2_6										1
PF01826_PF00094_PF08742_PF13330	TIL~VWD~C8~Mucin2_WxxW										1
PF02023_PF04218_PF03221_PF03184	SCAN~CENP-B_N~HTH_Tnp_Tc5~DDE_1										1
PF02337_PF00607_PF00075_PF02022	Gag_p10~Gag_p24~RNase_H~Integrase_Zn										1
PF03172_PF01342_PF00628_PF00439	HSR~SAND~PHD~Bromodomain										1
PF07645_PF00008_PF00066_PF06816_PF07684_PF12796	EGF_CA~EGF~Notch~NOD~NODP~Ank_2										1
PF07679_PF05790_PF00047_PF13927_PF13895	I-set~C2-set~ig~Ig_3~Ig_2										1
PF07703_PF00207_PF10569_PF07678_PF07677	A2M_N_2~A2M~Thiol-ester_cl~A2M_comp~A2M_recep										1
PF07703_PF01821_PF00207_PF10569_PF07678	A2M_N_2~ANATO~A2M~Thiol-ester_cl~A2M_comp										1
PF08409_PF07719_PF14559_PF13424_PF13414	DUF1736~TPR_2~TPR_19~TPR_12~TPR_11										1
PF10344_PF10293_PF10347_PF10351	Fmp27~DUF2405~Fmp27_GFWDK~Apt1										1
PF10427_PF00627_PF12938_PF16608_PF00076	Ago_hook~UBA~M_domain~TNRC6-PABC_bdg~RRM_1										1
PF12775_PF12780_PF12777_PF12781	AAA_7~AAA_8~MT~AAA_9										1
PF13639_PF07653_PF00018_PF14604	zf-RING_2~SH3_2~SH3_1~SH3_9										1
PF00307_PF00435_PF13499_PF02187	CH~Spectrin~EF-hand_7~GAS2	2	1	2	2	2	2
PF00109_PF02801_PF16197_PF00698_PF14765_PF00107_PF08659_PF00550_PF00975	ketoacyl-synt~Ketoacyl-synt_C~KAsynt_C_assoc~Acyl_transf_1~PS-DH~ADH_zinc_N~KR~PP-binding~Thioesterase	1	1	1	1	1
PF02865_PF01017_PF02864_PF00017_PF14596	STAT_int~STAT_alpha~STAT_bind~SH2~STAT6_C	1	1	1	1	1
PF13540_PF00415_PF00621_PF02493_PF02204	RCC1_2~RCC1~RhoGEF~MORN~VPS9	1	1	1	1	1
PF13855_PF13306_PF07679_PF00041	LRR_8~LRR_5~I-set~fn3	1	1	1	1	1
PF09409_PF00641_PF16678_PF01485	PUB~zf-RanBP~HOIP-UBA~IBR	1	1	1	1		1
PF16589_PF00644_PF08487_PF13768	BRCT_2~PARP~VIT~VWA_3	1	1	1	1		1
PF02210_PF00093_PF07645_PF12662	Laminin_G_2~VWC~EGF_CA~cEGF	1	1	1		1	1
PF00090_PF05986_PF00014_PF16626_PF07679_PF08686	TSP_1~ADAM_spacer1~Kunitz_BPTI~Papilin_u7~I-set~PLAC	1	1	1		1
PF09058_PF10608_PF00595_PF10600_PF07653_PF00625	L27_1~MAGUK_N_PEST~PDZ~PDZ_assoc~SH3_2~Guanylate_kin							2	1	2	2
PF00130_PF10409_PF00017_PF08416	C1_1~PTEN_C2~SH2~PTB							1	1	1	1
PF08266_PF00028_PF16492_PF15974	Cadherin_2~Cadherin~Cadherin_C_2~Cadherin_tail	1	2	2	2	2	1	25	23	2	5
PF01562_PF01421_PF00200_PF08516	Pep_M12B_propep~Reprolysin~Disintegrin~ADAM_CR	19	21	19	19	21	14	17	32	25	33
PF15227_PF00643_PF13765_PF00622	zf-C3HC4_4~zf-B_box~PRY~SPRY	21	21	15	18	16	12	14	14	18	13
PF16209_PF00122_PF13246_PF16212	PhoLip_ATPase_N~E1-E2_ATPase~Cation_ATPase~PhoLip_ATPase_C	9	9	6	11	9	7	10	10	13	12
PF00078_PF00075_PF09337_PF00665	RVT_1~RNase_H~zf-H2C2~rve			2					5
PF00111_PF01799_PF00941_PF03450_PF01315_PF02738	Fer2~Fer2_2~FAD_binding_5~CO_deh_flav_C~Ald_Xan_dh_C~Ald_Xan_dh_C2	4	2	4	4	4	4	2	5	8	4
PF00094_PF08742_PF01826_PF13330	VWD~C8~TIL~Mucin2_WxxW		3	1	3	2	2	2	2	6	2
PF15227_PF11002_PF13765_PF00622	zf-C3HC4_4~RDM~PRY~SPRY	2	3	2				5	1	2
PF01835_PF07703_PF01821_PF00207_PF10569_PF07678_PF07677_PF01759	A2M_N~A2M_N_2~ANATO~A2M~Thiol-ester_cl~A2M_comp~A2M_recep~NTR	2	2	1	1	2	1	5	3	3	4
PF00690_PF00122_PF13246_PF00689	Cation_ATPase_N~E1-E2_ATPase~Cation_ATPase~Cation_ATPase_C	6	7	6	8	5	8	9	8	8	7
PF01835_PF07703_PF00207_PF10569_PF07678_PF07677	A2M_N~A2M_N_2~A2M~Thiol-ester_cl~A2M_comp~A2M_recep	6	6	4	6	7	4	4	6	6	4
PF13445_PF00643_PF13765_PF00622	zf-RING_UBOX~zf-B_box~PRY~SPRY	1	2	4	2	1	1	1	4	2	2
PF08385_PF08393_PF12774_PF07728_PF12775_PF12780_PF12777_PF12781_PF03028	DHC_N1~DHC_N2~AAA_6~AAA_5~AAA_7~AAA_8~MT~AAA_9~Dynein_heavy	6	8	7	8	8	6	9	8	9	9
PF00097_PF00643_PF13765_PF00622	zf-C3HC4~zf-B_box~PRY~SPRY	4	1			1		1	1	1	1
PF02375_PF01388_PF00628_PF02373_PF02928_PF08429	JmjN~ARID~PHD~JmjC~zf-C5HC2~PLU-1	1	3	4	3	2	2	4	4	3	3
PF01562_PF01421_PF00090_PF05986	Pep_M12B_propep~Reprolysin~TSP_1~ADAM_spacer1	8	10	9	10	10	8	9	10	9	11
PF01404_PF07699_PF00041_PF14575_PF07714_PF00536	Ephrin_lbd~Ephrin_rec_like~fn3~EphA2_TM~Pkinase_Tyr~SAM_1	4	4	5	6	4	3	4	4	5	6
PF09379_PF00373_PF09380_PF08736	FERM_N~FERM_M~FERM_C~FA	4	4	6	6	4	6	6	6	5	6
PF00431_PF14670_PF00084_PF00089	CUB~FXa_inhibition~Sushi~Trypsin	3	1	3	2	2	2	2	4	2	1
PF08393_PF12774_PF12775_PF12780_PF12777_PF12781_PF03028	DHC_N2~AAA_6~AAA_7~AAA_8~MT~AAA_9~Dynein_heavy	3	2	3	3	3	3	4	5	3	2
PF16746_PF00169_PF01412_PF12796	BAR_3~PH~ArfGap~Ank_2	4	2	3	2	3	3	3	3	3	1
PF00594_PF00008_PF14670_PF00089	Gla~EGF~FXa_inhibition~Trypsin	4	2	3	2	3	2	3	4	3	4
PF12947_PF12662_PF14670_PF07645_PF07699_PF00431	EGF_3~cEGF~FXa_inhibition~EGF_CA~Ephrin_rec_like~CUB	3	2	3	2	1	1	3	3	2	3
PF04997_PF00623_PF04983_PF05000_PF04998	RNA_pol_Rpb1_1~RNA_pol_Rpb1_2~RNA_pol_Rpb1_3~RNA_pol_Rpb1_4~RNA_pol_Rpb1_5	2	2	2	2	1	1	2	2	4	2
PF17205_PF00362_PF07965_PF08725	PSI_integrin~Integrin_beta~Integrin_B_tail~Integrin_b_cyt	1	3	3	3	1	3	2	2	2	3
PF00055_PF00053_PF00052_PF06008_PF06009_PF00054_PF02210	Laminin_N~Laminin_EGF~Laminin_B~Laminin_I~Laminin_II~Laminin_G_1~Laminin_G_2	1	1	1	2	2	2	1	3	1	3
PF01404_PF00041_PF14575_PF07714_PF00536	Ephrin_lbd~fn3~EphA2_TM~Pkinase_Tyr~SAM_1	6	7	7	5	5	7	7	6	6	6
PF00063_PF00784_PF07653_PF00373	Myosin_head~MyTH4~SH3_2~FERM_M	2	3	2	1	2		3	1	2	1
PF12409_PF00690_PF00122_PF00702	P5-ATPase~Cation_ATPase_N~E1-E2_ATPase~Hydrolase			2	1	2	1	3	2	3	2
PF16511_PF12796_PF07653_PF00595_PF00536	FERM_f0~Ank_2~SH3_2~PDZ~SAM_1		3	3	3	2	1	3	2	3	3
PF00270_PF00271_PF04408_PF07717	DEAD~Helicase_C~HA2~OB_NTP_bind	9	7	8	9	9	8	9	9	9	8
PF01403_PF01437_PF01833_PF08337	Sema~PSI~TIG~Plexin_cytopl	7	9	9	8	9	9	8	9	9	8
PF02865_PF01017_PF02864_PF00017	STAT_int~STAT_alpha~STAT_bind~SH2	4	3	3	4	4	2	4	3	4	4
PF00168_PF08151_PF08150_PF16165	C2~FerI~FerB~Ferlin_C	3	3	2	2	3	1	2	3	3	3
PF14716_PF10391_PF14792_PF14791	HHH_8~DNA_pol_lambd_f~DNA_pol_B_palm~DNA_pol_B_thumb	2	3	2	3	2	3	1	3	3	3
PF07145_PF00009_PF03144_PF03143	PAM2~GTP_EFTU~GTP_EFTU_D2~GTP_EFTU_D3		1	2	2		1	2	2	1	3
PF01479_PF00900_PF00467_PF16121	S4~Ribosomal_S4e~KOW~40S_S4_C				1		2
PF00094_PF08742_PF01826_PF12714	VWD~C8~TIL~TILa								2	1
PF01562_PF01421_PF00090_PF05986_PF08686	Pep_M12B_propep~Reprolysin~TSP_1~ADAM_spacer1~PLAC	4	4	5	4	5	3	5	5	5	4
PF01471_PF00413_PF00045_PF11857	PG_binding_1~Peptidase_M10~Hemopexin~DUF3377	4	2	3	3	3	3	4	4	4	4
PF01030_PF00757_PF14843_PF07714	Recep_L_domain~Furin-like~GF_recep_IV~Pkinase_Tyr	3	3	4	4	4	2	4	4	4	4
PF07647_PF00169_PF01412_PF00620_PF00788	SAM_2~PH~ArfGap~RhoGAP~RA	1	3	1	1	1	2	1	2	1	1
PF13927_PF07679_PF00041_PF13882	Ig_3~I-set~fn3~Bravo_FIGEY	4	3	2	2	2	2	2	2	2	2
PF00092_PF01839_PF08441_PF00357	VWA~FG-GAP~Integrin_alpha2~Integrin_alpha	3	2	1	2	2	2	2	1	2	3
PF00651_PF07707_PF13964_PF01344	BTB~BACK~Kelch_6~Kelch_1	2	2	2	2	1	1	2	3	2	3
PF00057_PF14670_PF07645_PF00058	Ldl_recept_a~FXa_inhibition~EGF_CA~Ldl_recept_b	2	2	2	1	2	1	2	3	3	2
PF01426_PF01448_PF00320_PF17226	BAH~ELM2~GATA	2	1	2	2	3	1	2	2	3	2
PF00307_PF00612_PF00616_PF03836	CH~IQ~RasGAP~RasGAP_C	1	3	1	2	3	2	2	2	2	2
PF17205_PF00362_PF07974_PF07965_PF08725	PSI_integrin~Integrin_beta~EGF_2~Integrin_B_tail~Integrin_b_cyt	1	1	1	2	2	1	3	2	2	2
PF09379_PF00373_PF09380_PF08736_PF04382_PF05902	FERM_N~FERM_M~FERM_C~FA~SAB~4_1_CTD	4	2	4	4	4	4	4	4	4	4
PF00168_PF00616_PF00169_PF00779	C2~RasGAP~PH~BTK	3	3	4	4	4	3	5	4	4	4
PF00794_PF00792_PF00613_PF00454_PF00787_PF00168	PI3K_rbd~PI3K_C2~PI3Ka~PI3_PI4_kinase~PX~C2	2	3	2	2	3	1	2	2	2	3
PF00651_PF07707_PF01344_PF13964	BTB~BACK~Kelch_1~Kelch_6		2	2	2	2	2	1	2	3	3
PF00788_PF00063_PF00612_PF00620	RA~Myosin_head~IQ~RhoGAP		1				1		2
PF14670_PF07645_PF00054_PF02210	FXa_inhibition~EGF_CA~Laminin_G_1~Laminin_G_2			2	1		1
PF00041_PF14575_PF07714_PF00536	fn3~EphA2_TM~Pkinase_Tyr~SAM_1				1	2	1
PF14513_PF00130_PF00781_PF00609	DAG_kinase_N~C1_1~DAGK_cat~DAGK_acc				1	1	2	2
PF00047_PF07679_PF13927_PF07714	ig~I-set~Ig_3~Pkinase_Tyr					1		2		2
PF16457_PF09279_PF00388_PF00387_PF00168	PH_12~EF-hand_like~PI-PLC-X~PI-PLC-Y~C2	3	3	4	3	4	3	2	3	3	3
PF06371_PF06367_PF02181_PF06345	Drf_GBD~Drf_FH3~FH2~Drf_DAD	2	2	3	2	1	2	2	2	2	3
PF00307_PF00681_PF00435_PF13499_PF02187	CH~Plectin~Spectrin~EF-hand_7~GAS2		1					1	2	1	2
PF07679_PF00090_PF00791_PF17217_PF00531	I-set~TSP_1~ZU5~UPA~Death	4	3	3	4	3	3	3	4	4	4
PF07686_PF00193_PF00008_PF00059_PF00084	V-set~Xlink~EGF~Lectin_C~Sushi	4	3	4	4	3	3	4	3	4	3
PF00088_PF16863_PF13802_PF01055	Trefoil~NtCtMGAM_N~Gal_mutarotas_2~Glyco_hydro_31	2	2		2	2	1	1	2	1	1
PF01471_PF00413_PF00040_PF00045	PG_binding_1~Peptidase_M10~fn2~Hemopexin	2	1	1	1	2	2	2	1	2	1
PF01412_PF12796_PF08518_PF16559_PF12205	ArfGap~Ank_2~GIT_SHD~GIT_CC~GIT1_C	2	1	1	1	1		1	2	2	2
PF02373_PF02008_PF16866_PF00646	JmjC~zf-CXXC~PHD_4~F-box	2	1		1	1	1	1	2	2	2
PF00090_PF02793_PF16489_PF01825_PF00002	TSP_1~HRM~GAIN~GPS~7tm_2	1	1	1	2	1	1	2	2	2	2
PF00219_PF00093_PF00090_PF00007	IGFBP~VWC~TSP_1~Cys_knot	1	1	2	1	1		2	2	2
PF14513_PF13499_PF00130_PF00781_PF00609	DAG_kinase_N~EF-hand_7~C1_1~DAGK_cat~DAGK_acc	1	1	2		1	1	1	2	2	2
PF12796_PF13637_PF00791_PF00531	Ank_2~Ank_4~ZU5~Death	1		2	1	1		2	1	2
PF00595_PF10600_PF00018_PF00625	PDZ~PDZ_assoc~SH3_1~Guanylate_kin		2	2	2	2	2	1	1	1	1
PF00219_PF07648_PF13365_PF13180	IGFBP~Kazal_2~Trypsin_2~PDZ_2		1	1	2	2	1	1	2	2	2
PF01404_PF00041_PF14575_PF07714_PF07647	Ephrin_lbd~fn3~EphA2_TM~Pkinase_Tyr~SAM_2		1	1	2	2	1	1	2	2
PF16209_PF00122_PF00702_PF16212	PhoLip_ATPase_N~E1-E2_ATPase~Hydrolase~PhoLip_ATPase_C		1	2	2	1	1	1	2	1	2
PF00009_PF03144_PF14492_PF03764_PF00679	GTP_EFTU~GTP_EFTU_D2~EFG_II~EFG_IV~EFG_C	3	3	2	3	3	2	3	2	2	3
PF00690_PF00122_PF00702_PF00689	Cation_ATPase_N~E1-E2_ATPase~Hydrolase~Cation_ATPase_C	3	2	3	3	3	3	2	2	2	3
PF02140_PF02191_PF02793_PF16489_PF01825_PF00002_PF02354	Gal_Lectin~OLF~HRM~GAIN~GPS~7tm_2~Latrophilin	2	3	2	3	3	2	3	2	3	3
PF07645_PF16489_PF01825_PF00002	EGF_CA~GAIN~GPS~7tm_2	2	2	2	2	2	1	2	1	1	1
PF01400_PF00431_PF14670_PF07645	Astacin~CUB~FXa_inhibition~EGF_CA	2	1	1	2	2	2	2	2	1	1
PF01352_PF00096_PF13912_PF13465	KRAB~zf-C2H2~zf-C2H2_6~zf-H2C2_2	2		1	1			1	2		1
PF01636_PF02771_PF02770_PF00441	APH~Acyl-CoA_dh_N~Acyl-CoA_dh_M~Acyl-CoA_dh_1	1	2	1	2	2	1	2	2	2	1
PF01394_PF09268_PF13838_PF00637	Clathrin_propel~Clathrin-link~Clathrin_H_link~Clathrin	1	2	1	1	2	2	2	1	1	1
PF07679_PF13927_PF00041_PF00102	I-set~Ig_3~fn3~Y_phosphatase	1	2	1	1	1	1	2	1	2	2
PF00168_PF00130_PF06292_PF10540	C2~C1_1~DUF1041~Membr_traf_MHD	1	2	2	2	1	2	1	1	1	1
PF00130_PF00168_PF06292_PF10540	C1_1~C2~DUF1041~Membr_traf_MHD	1	1	1	1	1	1	2	2	2	2
PF08709_PF02815_PF01365_PF00622_PF02026_PF08454_PF13833_PF06459_PF00520	Ins145_P3_rec~MIR~RYDR_ITPR~SPRY~RyR~RIH_assoc~EF-hand_8~RR_TM4-6~Ion_trans	1	1	2	2	1	1	2	2	2	2
PF08071_PF01479_PF00900_PF00467_PF16121	RS4NT~S4~Ribosomal_S4e~KOW~40S_S4_C	1	1		2		1	1	1	2	2
PF00028_PF02210_PF00008_PF00053_PF16489_PF01825_PF00002	Cadherin~Laminin_G_2~EGF~Laminin_EGF~GAIN~GPS~7tm_2		2	1	1	2	1	1		1	2
PF00055_PF00053_PF00052_PF06008_PF06009_PF02210	Laminin_N~Laminin_EGF~Laminin_B~Laminin_I~Laminin_II~Laminin_G_2		2	1	1	1	1	2	1	2
PF00028_PF00008_PF02210_PF00053_PF02793_PF16489_PF01825_PF00002	Cadherin~EGF~Laminin_G_2~Laminin_EGF~HRM~GAIN~GPS~7tm_2		1	1	2	1	2	1	2	1
PF01404_PF07699_PF00041_PF14575_PF07714_PF07647	Ephrin_lbd~Ephrin_rec_like~fn3~EphA2_TM~Pkinase_Tyr~SAM_2		1	1		1	2	2	2	1	1
PF02758_PF14484_PF05729_PF13516	PYRIN~FISNA~NACHT~LRR_6	2	2	2	2	2	1		2	1	1
PF00169_PF00621_PF00618_PF00617	PH~RhoGEF~RasGEF_N~RasGEF	1	2	1	2	2		2	1	2	2
PF00040_PF00008_PF00039_PF00051_PF00089	fn2~EGF~fn1~Kringle~Trypsin	1	1	1	2	2		1	1	2	1
PF02210_PF00093_PF07645_PF12947	Laminin_G_2~VWC~EGF_CA~EGF_3	1					1		2		1
PF01352_PF00096_PF13465_PF13912	KRAB~zf-C2H2~zf-H2C2_2~zf-C2H2_6	1							1	2	1
PF16746_PF00169_PF01412_PF13857	BAR_3~PH~ArfGap~Ank_5		2	1	2	1	1	1	1	1	2
PF01030_PF00757_PF00041_PF07714	Recep_L_domain~Furin-like~fn3~Pkinase_Tyr		1		1	2	2		1	1	1
PF07686_PF08205_PF13765_PF00622	V-set~C2-set_2~PRY~SPRY			1	1	2		1	2	1	1
PF00690_PF00122_PF13246_PF00689_PF12424	Cation_ATPase_N~E1-E2_ATPase~Cation_ATPase~Cation_ATPase_C~ATP_Ca_trans_C	4	4	4	4	4	3	3	3	4	4
PF09279_PF00388_PF00387_PF00168	EF-hand_like~PI-PLC-X~PI-PLC-Y~C2	3	3	2	3	2	3	3	2	3	3
PF00520_PF16905_PF08763_PF16885	Ion_trans~GPHH~Ca_chan_IQ~CAC1F_C	2	3	3	2	3	3	2	3	3	3
PF08393_PF12774_PF07728_PF12775_PF12780_PF12777_PF12781_PF03028	DHC_N2~AAA_6~AAA_5~AAA_7~AAA_8~MT~AAA_9~Dynein_heavy	2	3	3	2	3	3	2	3	3	3
PF08073_PF00628_PF00385_PF00176_PF00271_PF06465_PF06461_PF08074	CHDNT~PHD~Chromo~SNF2_N~Helicase_C~DUF1087~DUF1086~CHDCT2	2	3	3	2	3	2	3	3	3	3
PF02192_PF00794_PF00792_PF00613_PF00454	PI3K_p85B~PI3K_rbd~PI3K_C2~PI3Ka~PI3_PI4_kinase	2	3	3	2	2	3	3	3	3	3
PF14604_PF16172_PF14429_PF06920	SH3_9~DOCK_N~DOCK-C2~DHR-2	2	2	1	1	2	1	1	1	1	1
PF16746_PF00169_PF01412_PF12796_PF14604	BAR_3~PH~ArfGap~Ank_2~SH3_9	2	1	1	1	2	1	1	1	2	1
PF04563_PF04561_PF04565_PF04566_PF04567_PF00562_PF04560	RNA_pol_Rpb2_1~RNA_pol_Rpb2_2~RNA_pol_Rpb2_3~RNA_pol_Rpb2_4~RNA_pol_Rpb2_5~RNA_pol_Rpb2_6~RNA_pol_Rpb2_7	1	2	1	1	2	2	2	2	2	2
PF16739_PF04851_PF00271_PF11648	CARD_2~ResIII~Helicase_C~RIG-I_C-RD	1	2	1	1	2	1	1	2	1	1
PF01094_PF07562_PF00003_PF10606	ANF_receptor~NCD3G~7tm_3~GluR_Homer-bdg	1	1	1	2	2	2	2	2	2	2
PF01390_PF00431_PF00057_PF00089	SEA~CUB~Ldl_recept_a~Trypsin	1	1	1	2	2	1	1	1	1	2
PF11971_PF00621_PF00169_PF00130_PF07653_PF00017	CAMSAP_CH~RhoGEF~PH~C1_1~SH3_2~SH2	1	1	1	1	1	2	2	1	2	1
PF13385_PF15787_PF06469_PF14844_PF02138	Laminin_G_3~DUF4704~DUF1088~PH_BEACH~Beach	1	1	2	2	2	1	2	2	2	2
PF00435_PF00397_PF09068_PF09069_PF00569	Spectrin~WW~EF-hand_2~EF-hand_3~ZZ	1	1	2	1	2	2	1	1	1	1
PF00169_PF02196_PF00595_PF00621	PH~RBD~PDZ~RhoGEF	1	1	2	1	1	2	1	1	1	2
PF02828_PF00595_PF07653_PF00625	L27~PDZ~SH3_2~Guanylate_kin	4	4	4	4	5	4	4	4	4	3
PF02194_PF00615_PF00787_PF08628	PXA~RGS~PX~Nexin_C	2	3	3	3	3	3	3	3	4	3
PF01321_PF16189_PF00557_PF16188	Creatinase_N~Creatinase_N_2~Peptidase_M24~Peptidase_M24_C	2	2	2	3	2	2	1	2	2	2
PF00536_PF00169_PF01412_PF00620_PF00788	SAM_1~PH~ArfGap~RhoGAP~RA			1	1	1	1	2	1	1	2
PF00057_PF07645_PF00058_PF14670	Ldl_recept_a~EGF_CA~Ldl_recept_b~FXa_inhibition	1	1	1		1					2
PF11971_PF00621_PF00169_PF00130_PF07653_PF00017_PF00018	CAMSAP_CH~RhoGEF~PH~C1_1~SH3_2~SH2~SH3_1	1		1	2				1	1
PF00018_PF16172_PF14429_PF06920	SH3_1~DOCK_N~DOCK-C2~DHR-2				1			1	2	1	1
PF13771_PF00628_PF13832_PF05964_PF05965_PF00856	zf-HC5HC2H~PHD~zf-HC5HC2H_2~FYRN~FYRC~SET	2	2	1	2		1	2	2	2	2
PF00307_PF00435_PF00397_PF09068_PF09069_PF00569	CH~Spectrin~WW~EF-hand_2~EF-hand_3~ZZ	2	2		2	1	1	2	2	2	2
PF00431_PF07645_PF00084_PF00089	CUB~EGF_CA~Sushi~Trypsin	1	2	1	2	1	1	1	1		1
PF01835_PF07703_PF01821_PF00207_PF07678_PF07677_PF01759	A2M_N~A2M_N_2~ANATO~A2M~A2M_comp~A2M_recep~NTR	1	1	1	2		2	1	1	1	1
PF01562_PF01421_PF00200_PF08516_PF07974	Pep_M12B_propep~Reprolysin~Disintegrin~ADAM_CR~EGF_2	1	1	2	1	1	1	1	2	1
PF04810_PF04811_PF08033_PF04815_PF00626	zf-Sec23_Sec24~Sec23_trunk~Sec23_BS~Sec23_helical~Gelsolin	6	5	6	6	6	5	6	6	6	6
PF09379_PF00373_PF09380_PF00769	FERM_N~FERM_M~FERM_C~ERM	3	4	4	4	3	4	4	4	4	4
PF02824_PF07973_PF00587_PF03129	TGS~tRNA_SAD~tRNA-synt_2b~HGTP_anticodon	3	3	3	3	3	2	2	3	3	3
PF01266_PF16350_PF01571_PF08669	DAO~FAO_M~GCV_T~GCV_T_C	2	3	2	3	3	3	3	3	3	3
PF02375_PF02373_PF13831_PF13832	JmjN~JmjC~PHD_2~zf-HC5HC2H_2	2	3	2	3	3	3	3	3	3	3
PF00350_PF01031_PF00169_PF02212	Dynamin_N~Dynamin_M~PH~GED	2	3	3	3	3	2	3	3	3	3
PF00778_PF02377_PF00595_PF00610_PF12316	DIX~Dishevelled~PDZ~DEP~Dsh_C	2	3	3	2	3	3	3	3	3	3
PF16511_PF09379_PF00373_PF09141_PF08913_PF01608	FERM_f0~FERM_N~FERM_M~Talin_middle~VBS~I_LWEQ	2	2	1	1	1	1	1	1	1	1
PF00554_PF16179_PF12796_PF00531	RHD_DNA_bind~RHD_dimer~Ank_2~Death	2	2	2	2	2	2	2	2	1	1
PF00240_PF12148_PF00628_PF02182	ubiquitin~TTD~PHD~SAD_SRA	2	2	2	2	1	1	2	2	2	2
PF02820_PF17208_PF12140_PF00536	MBT~RBR~SLED~SAM_1	2	2	2	1	2	1	2	2	2	2
PF08880_PF07529_PF07533_PF00176_PF00271_PF14619_PF00439	QLQ~HSA~BRK~SNF2_N~Helicase_C~SnAC~Bromodomain	2	1	2	2	2	2	2	1	2	2
PF09379_PF00373_PF09380_PF11819	FERM_N~FERM_M~FERM_C~DUF3338	2	1	2	2	2	2	2	2	1	2
PF00053_PF06008_PF06009_PF02210	Laminin_EGF~Laminin_I~Laminin_II~Laminin_G_2	2	1	2	1	1	1	1	1	1	1
PF00225_PF16183_PF00498_PF12423_PF12473_PF00169	Kinesin~Kinesin_assoc~FHA~KIF1B~DUF3694~PH	1	2	1	2	2	2	2	2	2	2
PF00094_PF08742_PF01826_PF05270	VWD~C8~TIL~AbfB	1	2	2	2	2	2	2	2	2	1
PF00388_PF00017_PF00018_PF00387_PF00168	PI-PLC-X~SH2~SH3_1~PI-PLC-Y~C2	1	2	2	2	2	2	1	2	2	2
PF05224_PF13884_PF13887_PF13888	NDT80_PhoG~Peptidase_S74~MRF_C1~MRF_C2	1	2	2	2	2	1	2	2	2	2
PF00270_PF00271_PF13234_PF08148	DEAD~Helicase_C~rRNA_proc-arch~DSHCT	1	2	2	2	1	2	2	2	2	2
PF07679_PF01392_PF00051_PF07714	I-set~Fz~Kringle~Pkinase_Tyr	1	2	2	2	1	2	2	2	2	2
PF01462_PF13855_PF00008_PF02210	LRRNT~LRR_8~EGF~Laminin_G_2	1	1	1	1	2	1	1	2	1	1
PF00008_PF07645_PF12661_PF00066_PF06816_PF07684_PF12796_PF11936	EGF~EGF_CA~hEGF~Notch~NOD~NODP~Ank_2~DUF3454	1	1	2	2	2	2	2	2	2	2
PF00130_PF00781_PF00609_PF12796	C1_1~DAGK_cat~DAGK_acc~Ank_2	1	1	2	2	2	2	2	2	2	2
PF09279_PF00388_PF00387_PF00168_PF08703	EF-hand_like~PI-PLC-X~PI-PLC-Y~C2~PLC-beta_C	1	1	2	2	2	2	2	2	2	2
PF00090_PF16489_PF01825_PF00002	TSP_1~GAIN~GPS~7tm_2	1	1	2	1	2	1	1	1	1	1
PF02023_PF01352_PF00096_PF13912	SCAN~KRAB~zf-C2H2~zf-C2H2_6	1		1	1	1		2			1
PF12796_PF08518_PF16559_PF12205	Ank_2~GIT_SHD~GIT_CC~GIT1_C		1	1	1	1	2	1
PF00130_PF16664_PF00018_PF07653	C1_1~STAC2_u1~SH3_1~SH3_2		1	1		1	1	1		2
PF13920_PF00643_PF00041_PF00622	zf-C3HC4_3~zf-B_box~fn3~SPRY	2	1	1	1	1		1	1
PF00008_PF07645_PF00066_PF06816_PF07684_PF12796_PF11936	EGF~EGF_CA~Notch~NOD~NODP~Ank_2~DUF3454	1	2	1		1		1		1	1
PF12796_PF13637_PF13857_PF00791_PF00531	Ank_2~Ank_4~Ank_5~ZU5~Death		1		1	1	1	1	1		2
PF07653_PF16172_PF14429_PF06920	SH3_2~DOCK_N~DOCK-C2~DHR-2		1		1		1	1	2	1	1
PF00130_PF00168_PF00069_PF00433	C1_1~C2~Pkinase~Pkinase_C	2	1		1	1		1	1	1	1
PF02177_PF12924_PF00014_PF12925_PF10515	APP_N~APP_Cu_bd~Kunitz_BPTI~APP_E2~APP_amyloid	1	1	1			1	1	1	2	1
PF13895_PF07679_PF00041_PF06583	Ig_2~I-set~fn3~Neogenin_C	1	1		1	1	1		2	1	1
PF07657_PF01414_PF00008_PF07645_PF12661	MNNL~DSL~EGF~EGF_CA~hEGF		1	1	2	1		1	1	1	1
PF05188_PF05192_PF05190_PF00488	MutS_II~MutS_III~MutS_IV~MutS_V	2	1	1	1		1	1	1	1	1
PF00169_PF00130_PF00781_PF00609_PF07647	PH~C1_1~DAGK_cat~DAGK_acc~SAM_2	1	2	2	2	2		2	2	2	2
PF00794_PF00792_PF00613_PF00454	PI3K_rbd~PI3K_C2~PI3Ka~PI3_PI4_kinase	1	1		2	1	1	1	1	1	1
PF00057_PF07645_PF00058_PF14670_PF12662_PF16472	Ldl_recept_a~EGF_CA~Ldl_recept_b~FXa_inhibition~cEGF~DUF5050	1	1		1	2	1	1	1	1	1
PF00090_PF00057_PF01823_PF00084	TSP_1~Ldl_recept_a~MACPF~Sushi	1	1		1	2	1	1	1	1	1
PF00063_PF00612_PF00784_PF00373	Myosin_head~IQ~MyTH4~FERM_M		1	1	1	1	1	1	2	1	1
PF00788_PF00169_PF08947_PF00017	RA~PH~BPS~SH2	3	3	2	3	3	3	3	3	3	3
PF11878_PF00169_PF14429_PF06920	DUF3398~PH~DOCK-C2~DHR-2	3	3	2	3	3	3	3	3	3	3
PF00899_PF16190_PF16191_PF10585_PF09358	ThiF~E1_FCCH~E1_4HB~UBA_e1_thiolCys~E1_UFD	3	3	3	3	3	3	3	4	3	3
PF08709_PF02815_PF01365_PF08454_PF00520	Ins145_P3_rec~MIR~RYDR_ITPR~RIH_assoc~Ion_trans	3	3	3	3	3	2	3	3	3	3
PF11598_PF07645_PF02412_PF05735	COMP~EGF_CA~TSP_3~TSP_C	2	3	3	3	3	3	3	3	3	3
PF16746_PF00169_PF00620_PF14604	BAR_3~PH~RhoGAP~SH3_9	2	3	3	3	3	3	3	3	3	3
PF16078_PF00676_PF02779_PF16870	2-oxogl_dehyd_N~E1_dh~Transket_pyr~OxoGdeHyase_C	2	2	1	2	2	2	2	2	2	2
PF00168_PF08151_PF08165_PF08150_PF16165	C2~FerI~FerA~FerB~Ferlin_C	2	2	2	2	2	2	2	2	1	2
PF00289_PF02786_PF02785_PF00364	Biotin_carb_N~CPSase_L_D2~Biotin_carb_C~Biotin_lipoyl	2	2	2	2	2	2	1	2	2	2
PF00385_PF00176_PF00271_PF13907	Chromo~SNF2_N~Helicase_C~DUF4208	2	2	2	2	2	2	2	2	2	1
PF00564_PF00130_PF00069_PF00433	PB1~C1_1~Pkinase~Pkinase_C	2	2	2	2	2	2	1	2	2	2
PF14598_PF16665_PF08832_PF16279_PF08815_PF07469	PAS_11~NCOA_u2~SRC-1~DUF4927~Nuc_rec_co-act~DUF1518	2	2	2	2	2	2	2	1	2	2
PF15787_PF16057_PF14844_PF02138	DUF4704~DUF4800~PH_BEACH~Beach	2	2	2	2	2	2	1	2	2	2
PF00289_PF02786_PF02785_PF00364_PF08326_PF01039	Biotin_carb_N~CPSase_L_D2~Biotin_carb_C~Biotin_lipoyl~ACC_central~Carboxyl_trans	2	2	2	2	2	1	2	2	2	2
PF09379_PF00373_PF09380_PF00102	FERM_N~FERM_M~FERM_C~Y_phosphatase	2	2	2	2	2	1	2	2	2	2
PF09379_PF00373_PF09380_PF08736_PF00621_PF00169	FERM_N~FERM_M~FERM_C~FA~RhoGEF~PH	2	2	2	2	2	1	2	2	2	2
PF11934_PF01858_PF01857_PF08934	DUF3452~RB_A~RB_B~Rb_C	2	2	2	2	2	1	2	2	2	2
PF16213_PF12783_PF01369_PF09324	DCB~Sec7_N~Sec7~DUF1981	2	2	2	2	2	1	2	2	2	2
PF02135_PF02172_PF00439_PF06001_PF08214_PF00569_PF09030	zf-TAZ~KIX~Bromodomain~DUF902~HAT_KAT11~ZZ~Creb_binding	2	2	2	2	1	2	2	2	2	2
PF16496_PF04433_PF00249_PF16498_PF16495	SWIRM-assoc_2~SWIRM~Myb_DNA-binding~SWIRM-assoc_3~SWIRM-assoc_1	2	2	2	2	1	2	2	2	2	2
PF16534_PF16557_PF02376_PF00046	ULD~CUTL~CUT~Homeobox	2	2	2	2	1	2	2	2	2	2
PF00125_PF00621_PF00169_PF00618_PF00617	Histone~RhoGEF~PH~RasGEF_N~RasGEF	2	2	2	1	2	2	2	2	2	2
PF00168_PF00130_PF00069_PF00433	C2~C1_1~Pkinase~Pkinase_C	1	2	2	2	2	2	2	2	2	2
PF02008_PF00628_PF13771_PF05964_PF05965_PF00856	zf-CXXC~PHD~zf-HC5HC2H~FYRN~FYRC~SET	1	2	2	2	2	2	2	2	2	2
PF02262_PF02761_PF02762_PF14447	Cbl_N~Cbl_N2~Cbl_N3~Prok-RING_4	1	2	2	2	2	2	2	2	2	2
PF03098_PF00036_PF01794_PF08022_PF08030	An_peroxidase~EF-hand_1~Ferric_reduct~FAD_binding_8~NAD_binding_6	1	2	2	2	2	2	2	2	2	2
PF03456_PF02141_PF12335_PF02893_PF06602_PF00169	uDENN~DENN~SBF2~GRAM~Myotub-related~PH	1	2	2	2	2	2	2	2	2	2
PF16562_PF00168_PF00397_PF00632	HECW_N~C2~WW~HECT	1	2	2	2	2	2	2	2	2	2
PF00683_PF07645_PF12662_PF14670	TB~EGF_CA~cEGF~FXa_inhibition	1	1	1	2	1	1	1	1	1	1
PF01403_PF01437_PF01833_PF07714	Sema~PSI~TIG~Pkinase_Tyr	1	1	1	2	1	1	1	1	1	1
PF16470_PF00082_PF01483_PF14843_PF08686	S8_pro-domain~Peptidase_S8~P_proprotein~GF_recep_IV~PLAC	1	1	1	2	1	1	1	1	1	1
PF08709_PF02815_PF01365_PF00622_PF02026_PF08454_PF06459_PF00520	Ins145_P3_rec~MIR~RYDR_ITPR~SPRY~RyR~RIH_assoc~RR_TM4-6~Ion_trans	1	1	1	1	2	1	1	1	1	1
PF00618_PF00595_PF00788_PF00617	RasGEF_N~PDZ~RA~RasGEF	1	1	1	1	1	2	1	1	1	1
PF00169_PF09279_PF00388_PF00387_PF00168	PH~EF-hand_like~PI-PLC-X~PI-PLC-Y~C2	1	1	1	1	1	1	1	1	2	1
PF09247_PF12157_PF15288_PF00439	TBP-binding~DUF3591~zf-CCHC_6~Bromodomain	1	1	1	1	1	1	2	1	1	1
PF16486_PF08699_PF02170_PF16488_PF16487_PF02171	ArgoN~ArgoL1~PAZ~ArgoL2~ArgoMid~Piwi	4	4	4	4	4	4	4	4	4	4
PF00169_PF00779_PF00018_PF00017_PF07714	PH~BTK~SH3_1~SH2~Pkinase_Tyr	3	3	3	3	3	3	3	3	3	3
PF00385_PF00176_PF00271_PF07533	Chromo~SNF2_N~Helicase_C~BRK	3	3	3	3	3	3	3	3	3	3
PF10513_PF13831_PF13832_PF00439_PF00855	EPL1~PHD_2~zf-HC5HC2H_2~Bromodomain~PWWP	3	3	3	3	3	3	3	3	3	3
PF11601_PF02214_PF00520_PF11879	Shal-type~BTB_2~Ion_trans~DUF3399	3	3	3	3	3	3	3	3	3	3
PF00018_PF00017_PF07714_PF08919	SH3_1~SH2~Pkinase_Tyr~F_actin_bind	2	2	2	2	2	2	2	2	2	2
PF00069_PF15796_PF08826_PF00130_PF00780	Pkinase~KELK~DMPK_coil~C1_1~CNH	2	2	2	2	2	2	2	2	2	2
PF00176_PF00271_PF09110_PF09111	SNF2_N~Helicase_C~HAND~SLIDE	2	2	2	2	2	2	2	2	2	2
PF00431_PF00754_PF00629_PF11980	CUB~F5_F8_type_C~MAM~DUF3481	2	2	2	2	2	2	2	2	2	2
PF01562_PF01421_PF00090_PF05986_PF08685	Pep_M12B_propep~Reprolysin~TSP_1~ADAM_spacer1~GON	2	2	2	2	2	2	2	2	2	2
PF02518_PF00204_PF01751_PF16898_PF00521_PF08070	HATPase_c~DNA_gyraseB~Toprim~TOPRIM_C~DNA_topoisoIV~DTHCT	2	2	2	2	2	2	2	2	2	2
PF02898_PF00258_PF00667_PF00175	NO_synthase~Flavodoxin_1~FAD_binding_1~NAD_binding_1	2	2	2	2	2	2	2	2	2	2
PF03456_PF02141_PF03455_PF02759_PF01477	uDENN~DENN~dDENN~RUN~PLAT	2	2	2	2	2	2	2	2	2	2
PF13445_PF00643_PF00630_PF01436	zf-RING_UBOX~zf-B_box~Filamin~NHL	2	2	2	2	2	2	2	2	2	2
PF16663_PF00397_PF00595_PF16666	MAGI_u1~WW~PDZ~MAGI_u5	2	2	2	2	2	2	2	2	2	2
PF12624_PF16908_PF16910_PF06650_PF16909_PF09333	Chorein_N~VPS13~VPS13_mid_rpt~SHR-BD~VPS13_C~ATG_C	2	2	2	2	2		2	2	2	2
PF00009_PF03144_PF00679_PF06421	GTP_EFTU~GTP_EFTU_D2~EFG_C~LepA_C	1	1	1	1	1	1	1	1	1	1
PF00069_PF02828_PF00595_PF07653_PF00625	Pkinase~L27~PDZ~SH3_2~Guanylate_kin	1	1	1	1	1	1	1	1	1	1
PF00069_PF08826_PF00130_PF00780	Pkinase~DMPK_coil~C1_1~CNH	1	1	1	1	1	1	1	1	1	1
PF00092_PF00041_PF01391_PF00014	VWA~fn3~Collagen~Kunitz_BPTI	1	1	1	1	1	1	1	1		1
PF00093_PF00094_PF08742_PF01826	VWC~VWD~C8~TIL	1	1	1	1	1	1	1	1	1	1
PF00094_PF08742_PF01826_PF16164_PF00092_PF00093	VWD~C8~TIL~VWA_N2~VWA~VWC	1	1	1	1	1	1	1	1	1	1
PF00095_PF07645_PF01390_PF00100	WAP~EGF_CA~SEA~Zona_pellucida	1	1	1	1	1	1	1		1	1
PF00095_PF07679_PF00014_PF01759	WAP~I-set~Kunitz_BPTI~NTR	1	1	1	1	1	1	1	1	1	1
PF00130_PF00788_PF00781_PF00609	C1_1~RA~DAGK_cat~DAGK_acc	1	1	1	1	1	1	1	1	1	1
PF00169_PF00779_PF00017_PF07714	PH~BTK~SH2~Pkinase_Tyr	1	1	1	1	1	1	1	1	1	1
PF00270_PF00271_PF16124_PF06959	DEAD~Helicase_C~RecQ_Zn_bind~RecQ5	1	1	1	1	1	1	1	1	1	1
PF00307_PF16615_PF14604_PF00621_PF00169_PF16614_PF16523	CH~RhoGEF67_u1~SH3_9~RhoGEF~PH~RhoGEF67_u2~betaPIX_CC	1	1	1	1	1	1	1	1	1	1
PF00431_PF00354_PF01825_PF00002	CUB~Pentaxin~GPS~7tm_2	1	1	1	1	1	1	1		1
PF00435_PF00018_PF13499_PF08726	Spectrin~SH3_1~EF-hand_7~EFhand_Ca_insen	1	1	1	1	1	1	1	1	1	1
PF00520_PF03520_PF16642_PF11956	Ion_trans~KCNQ_channel~KCNQ2_u3~KCNQC3-Ank-G_bd	1	1	1	1	1	1	1	1	1	1
PF00536_PF10534_PF00595_PF06663	SAM_1~CRIC_ras_sig~PDZ~DUF1170	1	1	1	1	1	1	1	1	1	1
PF00594_PF00051_PF09396_PF00089	Gla~Kringle~Thrombin_light~Trypsin	1	1	1	1	1	1	1	1	1	1
PF00595_PF02898_PF00258_PF00667_PF00175	PDZ~NO_synthase~Flavodoxin_1~FAD_binding_1~NAD_binding_1	1	1	1	1	1	1	1	1	1	1
PF00629_PF00047_PF00041_PF00102	MAM~ig~fn3~Y_phosphatase	1	1	1	1	1	1	1	1	1	1
PF00629_PF07679_PF00041_PF00102	MAM~I-set~fn3~Y_phosphatase	1	1	1	1	1	1	1	1	1	1
PF00645_PF04675_PF01068_PF04679_PF16759	zf-PARP~DNA_ligase_A_N~DNA_ligase_A_M~DNA_ligase_A_C~LIG3_BRCT	1	1	1	1	1	1	1	1	1	1
PF00645_PF08063_PF00533_PF05406_PF02877_PF00644	zf-PARP~PADR1~BRCT~WGR~PARP_reg~PARP	1	1	1	1	1	1	1	1	1	1
PF00648_PF01067_PF16648_PF13833	Peptidase_C2~Calpain_III~Calpain_u2~EF-hand_8	1	1	1	1	1	1	1	1	1	1
PF00651_PF07707_PF13964_PF01344_PF13415	BTB~BACK~Kelch_6~Kelch_1~Kelch_3	1	1	1	1	1	1		1	1	1
PF00651_PF13637_PF13857_PF12796_PF01363	BTB~Ank_4~Ank_5~Ank_2~FYVE	1	1	1	1	1	1	1		1
PF00753_PF10996_PF07521_PF11718	Lactamase_B~Beta-Casp~RMMBL~CPSF73-100_C	1	1	1	1	1	1	1	1	1	1
PF00780_PF10366_PF00637_PF10367	CNH~Vps39_1~Clathrin~Vps39_2	1	1	1	1	1	1	1	1	1	1
PF00787_PF00169_PF00614_PF13091	PX~PH~PLDc~PLDc_2	1	1	1	1	1	1	1	1	1	1
PF00855_PF01624_PF05188_PF05192_PF05190_PF00488	PWWP~MutS_I~MutS_II~MutS_III~MutS_IV~MutS_V	1	1	1	1	1	1	1	1	1	1
PF00917_PF00443_PF12436_PF14533	MATH~UCH~USP7_ICP0_bdg~USP7_C2	1	1	1	1	1	1	1	1	1	1
PF00988_PF00117_PF02786_PF02787_PF02142	CPSase_sm_chain~GATase~CPSase_L_D2~CPSase_L_D3~MGS	1	1	1	1	1	1	1	1	1	1
PF00988_PF00117_PF02786_PF02787_PF02142_PF02729_PF00185	CPSase_sm_chain~GATase~CPSase_L_D2~CPSase_L_D3~MGS~OTCace_N~OTCace	1	1	1	1	1	1	1	1	1	1
PF01094_PF10613_PF00060_PF10565	ANF_receptor~Lig_chan-Glu_bd~Lig_chan~NMDAR2_C	1	1	1	1	1	1	1	1	1	1
PF01424_PF00270_PF00271_PF04408_PF07717_PF04146	R3H~DEAD~Helicase_C~HA2~OB_NTP_bind~YTH	1	1	1	1	1	1	1	1	1	1
PF01426_PF01448_PF00320_PF03154	BAH~ELM2~GATA~Atrophin-1	1	1	1	1	1	1	1	1	1	1
PF01429_PF02791_PF00628_PF00439	MBD~DDT~PHD~Bromodomain	1	1	1	1	1	1	1	1	1	1
PF01462_PF13855_PF16920_PF07679_PF07714	LRRNT~LRR_8~TPKR_C2~I-set~Pkinase_Tyr	1	1	1	1	1	1	1		1
PF01562_PF13688_PF00200_PF16698	Pep_M12B_propep~Reprolysin_5~Disintegrin~ADAM17_MPD	1	1	1	1	1	1	1	1	1	1
PF01612_PF00270_PF00271_PF16124_PF09382_PF00570_PF14493	DNA_pol_A_exo1~DEAD~Helicase_C~RecQ_Zn_bind~RQC~HRDC~HTH_40	1	1	1	1	1	1	1	1	1	1
PF01624_PF05188_PF05192_PF00488	MutS_I~MutS_II~MutS_III~MutS_V	1	1	1	1	1	1	1	1	1	1
PF01751_PF01131_PF01396_PF06839	Toprim~Topoisom_bac~zf-C4_Topoisom~zf-GRF	1	1	1	1	1	1	1	1	1	1
PF02208_PF07653_PF00018_PF14604	Sorb~SH3_2~SH3_1~SH3_9	1	1	1	1	1	1	1	1	1	1
PF02359_PF02933_PF00004_PF09336	CDC48_N~CDC48_2~AAA~Vps4_C	1	1	1	1	1	1	1	1	1	1
PF02375_PF01388_PF02373_PF02928	JmjN~ARID~JmjC~zf-C5HC2	1	1	1	1	1	1	1	1	1	1
PF02574_PF00809_PF02607_PF02310_PF02965	S-methyl_trans~Pterin_bind~B12-binding_2~B12-binding~Met_synt_B12	1	1	1	1	1	1	1	1	1	1
PF02791_PF00628_PF15613_PF00439	DDT~PHD~WSD~Bromodomain	1	1	1	1	1	1	1	1	1	1
PF02844_PF01071_PF02843_PF00586_PF02769_PF00551	GARS_N~GARS_A~GARS_C~AIRS~AIRS_C~Formyl_trans_N	1	1	1	1	1	1	1	1	1	1
PF02865_PF01017_PF02864_PF00017_PF12162	STAT_int~STAT_alpha~STAT_bind~SH2~STAT1_TAZ2bind	1	1	1	1	1	1	1	1	1	1
PF02865_PF01017_PF02864_PF00017_PF12188	STAT_int~STAT_alpha~STAT_bind~SH2~STAT2_C	1	1	1	1	1	1	1	1	1	1
PF03160_PF13385_PF03736_PF00002	Calx-beta~Laminin_G_3~EPTP~7tm_2	1	1	1	1	1	1	1	1	1	1
PF03813_PF17403_PF17404_PF17405_PF17406_PF17407	Nrap	1	1	1	1	1	1	1	1	1	1
PF03835_PF10403_PF10404_PF10405	Rad4~BHD_1~BHD_2~BHD_3	1	1	1	1	1	1	1	1	1	1
PF04057_PF01336_PF16900_PF08646	Rep-A_N~tRNA_anti-codon~REPA_OB_2~Rep_fac-A_C	1	1	1	1	1	1		1	1	1
PF04563_PF04561_PF04565_PF06883_PF00562_PF04560	RNA_pol_Rpb2_1~RNA_pol_Rpb2_2~RNA_pol_Rpb2_3~RNA_pol_Rpa2_4~RNA_pol_Rpb2_6~RNA_pol_Rpb2_7	1	1	1	1	1	1	1	1	1	1
PF04814_PF00046_PF04812_PF04813	HNF-1_N~Homeobox~HNF-1B_C~HNF-1A_C	1	1	1	1	1	1	1	1	1	1
PF04822_PF00595_PF16610_PF00625	Takusan~PDZ~dbPDZ_assoc~Guanylate_kin	1	1	1	1	1	1	1	1	1	1
PF04969_PF16602_PF00443_PF01753	CS~USP19_linker~UCH~zf-MYND	1	1	1	1	1	1	1	1	1	1
PF04997_PF00623_PF04983_PF05000_PF04998_PF04992_PF04990	RNA_pol_Rpb1_1~RNA_pol_Rpb1_2~RNA_pol_Rpb1_3~RNA_pol_Rpb1_4~RNA_pol_Rpb1_5~RNA_pol_Rpb1_6~RNA_pol_Rpb1_7	1	1	1	1	1	1	1	1	1	1
PF05386_PF05731_PF13271_PF05729_PF00400	TEP1_N~TROVE~DUF4062~NACHT~WD40	1	1	1	1	1	1	1	1	1	1
PF05773_PF00642_PF00270_PF00271_PF04408_PF07717	RWD~zf-CCCH~DEAD~Helicase_C~HA2~OB_NTP_bind	1	1	1	1	1	1	1	1	1	1
PF05831_PF08699_PF02170_PF02171	GAGE~ArgoL1~PAZ~Piwi	1	1	1	1	1	1	1	1	1	1
PF06012_PF06025_PF00627_PF02825_PF14377_PF00632	DUF908~DUF913~UBA~WWE~DUF4414~HECT	1	1	1	1	1	1	1	1	1	1
PF06119_PF00094_PF08742_PF01826_PF12714_PF00100	NIDO~VWD~C8~TIL~TILa~Zona_pellucida	1	1	1	1	1	1	1	1	1	1
PF06464_PF12047_PF02008_PF01426_PF00145	DMAP_binding~DNMT1-RFD~zf-CXXC~BAH~DNA_methylase	1	1	1	1	1	1	1	1	1	1
PF07679_PF09042_PF02818_PF00041_PF00069	I-set~Titin_Z~PPAK~fn3~Pkinase	1	1	1	1	1	1	1	1	1	1
PF07679_PF13927_PF00090_PF07474_PF07645_PF12662	I-set~Ig_3~TSP_1~G2F~EGF_CA~cEGF	1	1	1	1	1	1	1	1	1	1
PF07679_PF13927_PF01392_PF07714	I-set~Ig_3~Fz~Pkinase_Tyr	1	1	1	1	1	1	1	1	1	1
PF07714_PF14604_PF09027_PF11555	Pkinase_Tyr~SH3_9~GTPase_binding~Inhibitor_Mig-6	1	1	1	1	1	1	1	1	1	1
PF08064_PF02259_PF00454_PF02260	UME~FAT~PI3_PI4_kinase~FATC	1	1	1	1	1	1	1	1	1	1
PF08068_PF01509_PF16198_PF01472	DKCLD~TruB_N~TruB_C_2~PUA	1	1	1	1	1	1	1	1	1	1
PF08082_PF08083_PF10598_PF10597_PF10596_PF12134_PF01398_PF08084	PRO8NT~PROCN~RRM_4~U5_2-snRNA_bdg~U6-snRNA_bdg~PRP8_domainIV~JAB~PROCT	1	1	1	1	1	1	1	1	1	1
PF08351_PF05127_PF13718_PF13725	DUF1726~Helicase_RecD~GNAT_acetyltr_2~tRNA_bind_2	1	1	1	1	1	1	1	1	1	1
PF08797_PF00176_PF13920_PF00271	HIRAN~SNF2_N~zf-C3HC4_3~Helicase_C	1	1	1	1	1	1	1	1	1	1
PF08953_PF00400_PF16300_PF08954	DUF1899~WD40~WD40_4~Trimer_CC	1	1	1	1	1	1		1	1	1
PF09058_PF10608_PF00595_PF10600_PF00018_PF00625	L27_1~MAGUK_N_PEST~PDZ~PDZ_assoc~SH3_1~Guanylate_kin	1	1	1	1	1	1		1
PF09371_PF16921_PF12836_PF00575	Tex_N~Tex_YqgF~HHH_3~S1	1	1	1	1	1	1	1	1	1	1
PF11865_PF02259_PF08771_PF00454_PF02260	DUF3385~FAT~FRB_dom~PI3_PI4_kinase~FATC	1	1	1	1	1	1	1	1	1	1
PF12254_PF03104_PF00136_PF08996	DNA_pol_alpha_N~DNA_pol_B_exo1~DNA_pol_B~zf-DNA_Pol	1	1	1	1	1	1	1	1	1	1
PF12485_PF07653_PF00536_PF07647	SLY~SH3_2~SAM_1~SAM_2	1	1	1	1	1	1	1	1	1	1
PF12560_PF13923_PF10426_PF12940	RAG1_imp_bd~zf-C3HC4_2~zf-RAG1~RAG1	1	1	1	1	1	1			1	1
PF12619_PF14551_PF17207_PF00493	MCM2_N~MCM_N~MCM_OB~MCM	1	1	1	1	1	1	1	1	1	1
PF12624_PF16908_PF16910_PF06650_PF16909	Chorein_N~VPS13~VPS13_mid_rpt~SHR-BD~VPS13_C	1	1	1	1	1	1		1	1	1
PF12701_PF16598_PF09532_PF03853	LSM14~Edc3_linker~FDF~YjeF_N	1	1	1	1	1	1	1	1	1	1
PF12763_PF14604_PF07653_PF00018_PF00621_PF16652_PF00168	EF-hand_4~SH3_9~SH3_2~SH3_1~RhoGEF~PH_13~C2	1	1	1	1	1	1	1	1	1	1
PF12796_PF09296_PF09297_PF00293	Ank_2~NUDIX-like~zf-NADH-PPase~NUDIX	1	1	1	1	1	1	1	1	1	1
PF13086_PF13087_PF01424_PF01428	AAA_11~AAA_12~R3H~zf-AN1	1	1	1	1	1	1	1	1	1	1
PF13414_PF13181_PF00515_PF13424_PF13844	TPR_11~TPR_8~TPR_1~TPR_12~Glyco_transf_41	1	1	1	1	1	1	1	1	1	1
PF13445_PF00643_PF00041_PF13765_PF00622	zf-RING_UBOX~zf-B_box~fn3~PRY~SPRY	1	1	1	1	1	1	1		1	1
PF13510_PF10588_PF00384_PF09326	Fer2_4~NADH-G_4Fe-4S_3~Molybdopterin~NADH_dhqG_C	1	1	1	1	1	1	1	1	1	1
PF13855_PF00791_PF10461_PF00531	LRR_8~ZU5~Peptidase_S68~Death	1	1	1	1	1	1	1	1	1	1
PF14598_PF16665_PF08832_PF08815_PF07469	PAS_11~NCOA_u2~SRC-1~Nuc_rec_co-act~DUF1518	1	1	1	1	1	1	1	1	1	1
PF14604_PF16618_PF00169_PF00620	SH3_9~SH3-WW_linker~PH~RhoGAP	1	1	1	1	1	1	1		1	1
PF14632_PF14641_PF14639_PF14635_PF14878_PF00575_PF14633	SPT6_acidic~HTH_44~YqgF~HHH_7~DLD~S1~SH2_2	1	1	1	1	1	1	1	1	1	1
PF14674_PF14675_PF14679_PF14676_PF14680_PF14677_PF14678	FANCI_S1-cap~FANCI_S1~FANCI_HD1~FANCI_S2~FANCI_HD2~FANCI_S3~FANCI_S4	1	1	1	1	1	1	1	1	1	1
PF14699_PF14701_PF14702_PF06202	hGDE_N~hDGE_amylase~hGDE_central~GDE_C	1	1	1	1	1	1	1	1	1	1
PF14788_PF00388_PF00387_PF00168	EF-hand_10~PI-PLC-X~PI-PLC-Y~C2	1	1	1	1	1	1	1	1	1	1
PF14826_PF00557_PF08644_PF08512	FACT-Spt16_Nlob~Peptidase_M24~SPT16~Rtt106	1	1	1	1	1	1	1	1	1	1
PF15044_PF13236_PF12807_PF13424	CLU_N~CLU~eIF3_p135~TPR_12	1	1	1	1	1	1	1	1	1	1
PF15557_PF11600_PF12253_PF15539	CAF1-p150_N~CAF-1_p150~CAF1A~CAF1-p150_C2	1	1	1	1	1	1	1	1		1
PF15687_PF15688_PF15689_PF15690	NRIP1_repr_1~NRIP1_repr_2~NRIP1_repr_3~NRIP1_repr_4	1	1	1	1	1	1	1	1	1	1
PF15902_PF15901_PF00058_PF00057_PF00041	Sortilin-Vps10~Sortilin_C~Ldl_recept_b~Ldl_recept_a~fn3	1	1	1	1	1	1	1	1	1	1
PF16004_PF00009_PF03144_PF14492_PF03764_PF00679	EFTUD2~GTP_EFTU~GTP_EFTU_D2~EFG_II~EFG_IV~EFG_C	1	1	1	1	1	1	1	1	1	1
PF16213_PF12783_PF09324_PF16206	DCB~Sec7_N~DUF1981~Mon2_C	1	1	1	1	1	1	1	1	1	1
PF16418_PF16417_PF16415_PF12842_PF04054	CNOT1_HEAT~CNOT1_TTP_bind~CNOT1_CAF1_bind~DUF3819~Not1	1	1	1	1	1	1	1	1	1	1
PF16470_PF00082_PF01483_PF12177	S8_pro-domain~Peptidase_S8~P_proprotein~Proho_convert	1	1	1	1	1	1	1	1	1	1
PF16661_PF10996_PF07521_PF13299	Lactamase_B_6~Beta-Casp~RMMBL~CPSF100_C	1	1	1	1	1	1	1	1	1	1
PF17229_PF15785_PF00454_PF02260	SMG1~PI3_PI4_kinase~FATC	1	1	1	1	1	1	1	1	1	1
PF17292_PF03531_PF08512_PF00505	SSrecog~Rtt106~HMG_box	1	1	1	1	1	1	1	1	1	1
PF00027_PF00618_PF00595_PF00788_PF00617	cNMP_binding~RasGEF_N~PDZ~RA~RasGEF	1	1	1	1	1		1	1	1	1
PF00039_PF00008_PF00051_PF00089	fn1~EGF~Kringle~Trypsin	1	1	1	1	1		1	1	1	1
PF00047_PF13895_PF00041_PF07714	ig~Ig_2~fn3~Pkinase_Tyr	1	1	1	1	1			1		1
PF00057_PF00058_PF14670_PF07645_PF12662	Ldl_recept_a~Ldl_recept_b~FXa_inhibition~EGF_CA~cEGF	1	1	1	1	1			1		1
PF00063_PF16735_PF00169_PF00784_PF00373	Myosin_head~MYO10_CC~PH~MyTH4~FERM_M	1	1	1	1	1		1	1	1	1
PF00093_PF00090_PF02412_PF05735	VWC~TSP_1~TSP_3~TSP_C	1	1	1	1	1		1	1	1
PF00225_PF00498_PF12423_PF12473_PF01302	Kinesin~FHA~KIF1B~DUF3694~CAP_GLY	1	1	1	1	1		1	1	1	1
PF00610_PF00027_PF00618_PF00617	DEP~cNMP_binding~RasGEF_N~RasGEF	1	1	1	1	1		1	1	1	1
PF03731_PF02735_PF03730_PF08785	Ku_N~Ku~Ku_C~Ku_PK_bind	1	1	1	1	1		1	1	1	1
PF04558_PF04557_PF00749_PF03950	tRNA_synt_1c_R1~tRNA_synt_1c_R2~tRNA-synt_1c~tRNA-synt_1c_C	1	1	1	1	1		1	1	1	1
PF07679_PF08205_PF13927_PF00041	I-set~C2-set_2~Ig_3~fn3	1	1	1	1	1				1	1
PF12796_PF13637_PF00023_PF13857_PF07647_PF00644	Ank_2~Ank_4~Ank~Ank_5~SAM_2~PARP	1	1	1	1	1			1	1	1
PF12796_PF13637_PF07653_PF00536_PF16907_PF16632	Ank_2~Ank_4~SH3_2~SAM_1~Caskin-Pro-rich~Caskin-tail	1	1	1	1	1		1	1	1	1
PF13385_PF00066_PF05572_PF00084	Laminin_G_3~Notch~Peptidase_M43~Sushi	1	1	1	1	1		1	1	1	1
PF13540_PF00415_PF08005_PF08239_PF13639	RCC1_2~RCC1~PHR~SH3_3~zf-RING_2	1	1	1	1	1		1			1
PF13855_PF07679_PF03098_PF00093	LRR_8~I-set~An_peroxidase~VWC	1	1	1	1	1		1	1	1	1
PF13927_PF07679_PF07474_PF07645_PF12662	Ig_3~I-set~G2F~EGF_CA~cEGF	1	1	1	1	1		1	1	1	1
PF00092_PF07699_PF00084_PF02494_PF00008_PF12661_PF00354_PF07645	VWA~Ephrin_rec_like~Sushi~HYR~EGF~hEGF~Pentaxin~EGF_CA	1	1	1	1		1	1		1	1
PF00536_PF10534_PF00595_PF06663_PF00169	SAM_1~CRIC_ras_sig~PDZ~DUF1170~PH	1	1	1	1		1	1	1	1	1
PF00575_PF00271_PF04408_PF07717	S1~Helicase_C~HA2~OB_NTP_bind	1	1	1	1		1	1	1	1	1
PF02878_PF02879_PF02880_PF00408	PGM_PMM_I~PGM_PMM_II~PGM_PMM_III~PGM_PMM_IV	1	1	1	1		1	1		1	1
PF09004_PF00076_PF13532_PF08241	DUF1891~RRM_1~2OG-FeII_Oxy_2~Methyltransf_11	1	1	1	1		1		1	1	1
PF09379_PF00373_PF09380_PF08736_PF00595_PF00102	FERM_N~FERM_M~FERM_C~FA~PDZ~Y_phosphatase	1	1	1	1		1	1	1	1	1
PF10537_PF15612_PF15613_PF00628_PF00439	WAC_Acf1_DNA_bd~WHIM1~WSD~PHD~Bromodomain	1	1	1	1		1	1	1	1	1
PF12796_PF13637_PF00023_PF00791_PF00531	Ank_2~Ank_4~Ank~ZU5~Death	1	1	1	1		1		1
PF13855_PF01822_PF00801_PF00059_PF02010_PF01477_PF08016	LRR_8~WSC~PKD~Lectin_C~REJ~PLAT~PKD_channel	1	1	1	1		1	1	1	1	1
PF00035_PF00270_PF00271_PF04408_PF07717	dsrm~DEAD~Helicase_C~HA2~OB_NTP_bind	1	1	1	1			1	1	1	1
PF16689_PF11414_PF00514_PF16629_PF05972_PF16630_PF05923_PF16633_PF05924_PF16634_PF16635_PF16636_PF05956_PF05937	APC_N_CC~Suppressor_APC~Arm~Arm_APC_u3~APC_15aa~APC_u5~APC_r~APC_u9~SAMP~APC_u13~APC_u14~APC_u15~APC_basic~EB1_binding	1	1	1	1			1
PF00084_PF00008_PF14670_PF07645	Sushi~EGF~FXa_inhibition~EGF_CA	1	1	1		1	1		1	1
PF03104_PF15735_PF00136_PF14260	DNA_pol_B_exo1~DUF4683~DNA_pol_B~zf-C4pol	1	1	1		1	1	1	1	1	1
PF08163_PF02259_PF00454_PF02260	NUC194~FAT~PI3_PI4_kinase~FATC	1	1	1		1	1	1	1	1	1
PF14664_PF14666_PF14663_PF14668_PF14665	RICTOR_N~RICTOR_M~RasGEF_N_2~RICTOR_V~RICTOR_phospho	1	1	1		1	1	1	1	1	1
PF12453_PF12567_PF00041_PF00102	PTP_N~CD45~fn3~Y_phosphatase	1	1	1		1		1		1	1
PF00362_PF07974_PF07965_PF08725	Integrin_beta~EGF_2~Integrin_B_tail~Integrin_b_cyt	1	1	1			1			1
PF09060_PF02828_PF00595_PF07653_PF00625	L27_N~L27~PDZ~SH3_2~Guanylate_kin	1	1	1			1	1	1	1	1
PF16646_PF00615_PF08833_PF00778	AXIN1_TNKS_BD~RGS~Axin_b-cat_bind~DIX	1	1	1			1	1	1	1	1
PF00009_PF03144_PF14492_PF00679	GTP_EFTU~GTP_EFTU_D2~EFG_II~EFG_C	1	1	1						1
PF04675_PF01068_PF04679_PF16589_PF11411	DNA_ligase_A_N~DNA_ligase_A_M~DNA_ligase_A_C~BRCT_2~DNA_ligase_IV	1	1	1					1		1
PF00270_PF00271_PF04408_PF00567	DEAD~Helicase_C~HA2~TUDOR	1	1		1	1	1	1	1	1	1
PF00618_PF00617_PF13202_PF00130	RasGEF_N~RasGEF~EF-hand_5~C1_1	1	1		1	1	1		1	1	1
PF00638_PF00641_PF12185_PF00160	Ran_BP1~zf-RanBP~IR1-M~Pro_isomerase	1	1		1	1	1	1	1	1	1
PF00788_PF00498_PF01843_PF00595	RA~FHA~DIL~PDZ	1	1		1	1	1	1	1	1	1
PF01352_PF09607_PF03221_PF03184	KRAB~BrkDBD~HTH_Tnp_Tc5~DDE_1	1	1		1	1	1	1	1	1
PF02262_PF02761_PF02762_PF14447_PF00627	Cbl_N~Cbl_N2~Cbl_N3~Prok-RING_4~UBA	1	1		1	1	1	1	1	1	1
PF06337_PF14836_PF00443_PF14533	DUSP~Ubiquitin_3~UCH~USP7_C2	1	1		1	1	1	1	1	1	1
PF06371_PF06367_PF06346_PF02181_PF06345	Drf_GBD~Drf_FH3~Drf_FH1~FH2~Drf_DAD	1	1		1	1	1	1	1	1
PF07679_PF16620_PF00041_PF00069	I-set~23ISL~fn3~Pkinase	1	1		1	1	1	1	1	1	1
PF09379_PF00373_PF09380_PF00595_PF00102	FERM_N~FERM_M~FERM_C~PDZ~Y_phosphatase	1	1		1	1	1	1	1	1	1
PF09379_PF00373_PF09380_PF00595_PF16599_PF00102	FERM_N~FERM_M~FERM_C~PDZ~PTN13_u3~Y_phosphatase	1	1		1	1	1	1	1	1	1
PF13418_PF07646_PF01344_PF00651	Kelch_4~Kelch_2~Kelch_1~BTB	1	1		1	1	1	1	1	1	1
PF00018_PF07653_PF14604_PF00621_PF03114	SH3_1~SH3_2~SH3_9~RhoGEF~BAR	1	1		1	1		1	1	1	1
PF00028_PF02210_PF00008_PF07645	Cadherin~Laminin_G_2~EGF~EGF_CA	1	1		1	1			1	1	1
PF00431_PF07974_PF13854_PF00059_PF01437	CUB~EGF_2~Kelch_5~Lectin_C~PSI	1	1		1	1		1		1	1
PF00551_PF02911_PF00550_PF00171	Formyl_trans_N~Formyl_trans_C~PP-binding~Aldedh	1	1		1	1			1	1	1
PF06119_PF07474_PF07645_PF12662_PF12947_PF00086_PF00058_PF14670	NIDO~G2F~EGF_CA~cEGF~EGF_3~Thyroglobulin_1~Ldl_recept_b~FXa_inhibition	1	1		1	1		1	1
PF13418_PF13964_PF13854_PF07646	Kelch_4~Kelch_6~Kelch_5~Kelch_2	1	1		1	1		1		1	1
PF00173_PF04969_PF00970_PF00175	Cyt-b5~CS~FAD_binding_6~NAD_binding_1	1	1		1		1	1	1	1	1
PF01833_PF07691_PF10162_PF13229	TIG~PA14~G8~Beta_helix	1	1		1		1		1		1
PF06119_PF07474_PF07645_PF12662_PF12947_PF00086_PF00058	NIDO~G2F~EGF_CA~cEGF~EGF_3~Thyroglobulin_1~Ldl_recept_b	1	1		1		1	1			1
PF07646_PF13415_PF13418_PF01344	Kelch_2~Kelch_3~Kelch_4~Kelch_1	1	1		1		1			1	1
PF09279_PF00388_PF00387_PF06631_PF08703	EF-hand_like~PI-PLC-X~PI-PLC-Y~DUF1154~PLC-beta_C	1	1		1		1	1	1	1	1
PF01462_PF13855_PF00008_PF12661_PF00054	LRRNT~LRR_8~EGF~hEGF~Laminin_G_1	1	1		1			1	1	1	1
PF01462_PF13855_PF01463_PF00008_PF02210	LRRNT~LRR_8~LRRCT~EGF~Laminin_G_2	1	1		1			1		1
PF00431_PF00008_PF00084_PF00089	CUB~EGF~Sushi~Trypsin	1	1			1	1	1	1	1	1
PF00621_PF03114_PF07653_PF14604	RhoGEF~BAR~SH3_2~SH3_9	1	1			1	1			1	1
PF13857_PF07738_PF06701_PF00632	Ank_5~Sad1_UNC~MIB_HERC2~HECT	1	1			1	1	1	1	1	1
PF00270_PF00271_PF03368_PF02170_PF00636	DEAD~Helicase_C~Dicer_dimer~PAZ~Ribonuclease_3	1	1			1					1
PF00989_PF08447_PF11413_PF08778	PAS~PAS_3~HIF-1~HIF-1a_CTAD	1	1				1	1	1
PF01352_PF13465_PF00096_PF13912	KRAB~zf-H2C2_2~zf-C2H2~zf-C2H2_6	1	1				1	1
PF01414_PF00008_PF07645_PF12661	DSL~EGF~EGF_CA~hEGF	1	1				1
PF04851_PF00271_PF16783_PF02732	ResIII~Helicase_C~FANCM-MHF_bd~ERCC4	1	1				1	1	1	1	1
PF08953_PF00400_PF16300_PF03656	DUF1899~WD40~WD40_4~Pam16	1	1				1	1
PF13418_PF01437_PF07645_PF00053	Kelch_4~PSI~EGF_CA~Laminin_EGF	1	1				1
PF16615_PF07653_PF00621_PF00169_PF16614_PF16523	RhoGEF67_u1~SH3_2~RhoGEF~PH~RhoGEF67_u2~betaPIX_CC	1	1				1
PF00153_PF08696_PF13086_PF13087	Mito_carr~Dna2~AAA_11~AAA_12	1	1
PF00533_PF10391_PF14792_PF14791	BRCT~DNA_pol_lambd_f~DNA_pol_B_palm~DNA_pol_B_thumb	1	1
PF00594_PF12662_PF00054_PF02210	Gla~cEGF~Laminin_G_1~Laminin_G_2	1	1					1
PF00683_PF07645_PF12662_PF12947	TB~EGF_CA~cEGF~EGF_3	1	1							1	1
PF01352_PF00856_PF09514_PF00096	KRAB~SET~SSXRD~zf-C2H2	1	1
PF01426_PF01448_PF00320_PF17226_PF03221_PF03184	BAH~ELM2~GATA~HTH_Tnp_Tc5~DDE_1	1	1
PF04055_PF13353_PF06463_PF01967	Radical_SAM~Fer4_12~Mob_synth_C~MoaC	1	1					1	1	1	1
PF07686_PF08205_PF13927_PF00047	V-set~C2-set_2~Ig_3~ig	1	1					1
PF09036_PF00621_PF00169_PF00168_PF00620	Bcr-Abl_Oligo~RhoGEF~PH~C2~RhoGAP	1	1					1		1	1
PF10382_PF06839_PF13086_PF13087	DUF2439~zf-GRF~AAA_11~AAA_12	1	1
PF12796_PF07653_PF16600_PF00536_PF16907_PF16632	Ank_2~SH3_2~Caskin1-CID~SAM_1~Caskin-Pro-rich~Caskin-tail	1	1
PF00008_PF07645_PF12947_PF00431	EGF~EGF_CA~EGF_3~CUB	1		1	1	1	1	1	1	1	1
PF00055_PF00053_PF00052_PF06008_PF06009_PF00054	Laminin_N~Laminin_EGF~Laminin_B~Laminin_I~Laminin_II~Laminin_G_1	1		1	1	1	1	1		1	1
PF00057_PF12662_PF00058_PF14670	Ldl_recept_a~cEGF~Ldl_recept_b~FXa_inhibition	1		1	1	1	1	1	1	1	1
PF00400_PF12894_PF04053_PF06957	WD40~ANAPC4_WD40~Coatomer_WDAD~COPI_C	1		1	1	1	1	1	1	1	1
PF00595_PF00615_PF16613_PF02196_PF16611_PF02188_PF16612	PDZ~RGS~RGS12_us1~RBD~RGS12_us2~GoLoco~RGS12_usC	1		1	1	1	1	1	1	1
PF00634_PF09169_PF09103_PF09121_PF09104	BRCA2~BRCA-2_helical~BRCA-2_OB1~Tower~BRCA-2_OB3	1		1	1	1	1	1	1	1	1
PF00749_PF03950_PF00458_PF00587_PF03129_PF09180	tRNA-synt_1c~tRNA-synt_1c_C~WHEP-TRS~tRNA-synt_2b~HGTP_anticodon~ProRS-C_1	1		1	1	1	1	1	1	1	1
PF01392_PF00057_PF15494_PF00089	Fz~Ldl_recept_a~SRCR_2~Trypsin	1		1	1	1	1	1	1	1	1
PF02177_PF12924_PF00014_PF12925_PF03494_PF10515	APP_N~APP_Cu_bd~Kunitz_BPTI~APP_E2~Beta-APP~APP_amyloid	1		1	1	1	1	1	1	1	1
PF05222_PF01262_PF12769_PF02233	AlaDh_PNT_N~AlaDh_PNT_C~PNTB_4TM~PNTB	1		1	1	1	1	1		1	1
PF13445_PF00643_PF00628_PF00439	zf-RING_UBOX~zf-B_box~PHD~Bromodomain	1		1	1	1	1	1	1	1	1
PF13927_PF00047_PF07679_PF16625_PF00041	Ig_3~ig~I-set~ISET-FN3_linker~fn3	1		1	1	1	1	1	1	1	1
PF14691_PF07992_PF01180_PF14697	Fer4_20~Pyr_redox_2~DHO_dh~Fer4_21	1		1	1	1	1	1	1	1	1
PF15790_PF07529_PF00176_PF00271	EP400_N~HSA~SNF2_N~Helicase_C	1		1	1	1	1	1	1	1	1
PF16202_PF08072_PF16204_PF00270_PF00271_PF16124_PF09382_PF00570	BLM_N~BDHCT~BDHCT_assoc~DEAD~Helicase_C~RecQ_Zn_bind~RQC~HRDC	1		1	1	1	1	1	1	1	1
PF16768_PF03399_PF16766_PF16769	NupH_GANP~SAC3_GANP~CID_GANP~MCM3AP_GANP	1		1	1	1	1	1	1	1	1
PF17517_PF00094_PF08742_PF01826_PF12714	VWD~C8~TIL~TILa	1		1	1	1	1	1			1
PF00017_PF00018_PF00169_PF00168	SH2~SH3_1~PH~C2	1		1	1	1		1	1	1	1
PF00650_PF00435_PF00621_PF00169_PF00018_PF16609_PF07679_PF00069	CRAL_TRIO~Spectrin~RhoGEF~PH~SH3_1~SH3-RhoG_link~I-set~Pkinase	1		1	1	1		1	1	1	1
PF02758_PF00643_PF13765_PF00622	PYRIN~zf-B_box~PRY~SPRY	1		1	1	1		1
PF11640_PF02259_PF00454_PF02260	TAN~FAT~PI3_PI4_kinase~FATC	1		1	1	1		1	1	1	1
PF17101_PF11380_PF00066_PF06464_PF17102_PF17103	Stealth_CR1~Stealth_CR2~Notch~DMAP_binding~Stealth_CR3~Stealth_CR4	1		1	1	1		1	1	1	1
[truncated: 225 more rows]
