# Supplementary material for: Signatures of conserved and unique molecular features in Afrotheria
Source: Springer Nature journal article supplement (doi:10.1038/s41598-020-79559-6), 2021-01-13
Supplement: MOESM4 [file 41598_2020_79559_MOESM4_ESM.xls]

## Sheet: S4A-functionaldomain
Includes Tables S4A, S4B
Table S4A- List of unique functional domain architectures in Afrotheria
~’ symbol connects two adjacent domains
Protein RefSeq ID	Species	Protein length (aa)	Protein description	Domain architecture	Architecture represented by domain description
XP_010584712.1	L. africana	871	carcinoembryonic antigen-related cell adhesion molecule 1 isoform X6	PF07686_PF13927_PF13895_PF13927_PF13895_PF13927_PF13895_PF13927	V-set~Ig_3~Ig_2~Ig_3~Ig_2~Ig_3~Ig_2~Ig_3
XP_010595837.1	L. africana	501	GDP-mannose 4,6 dehydratase isoform X1	PF16363_PF03946_PF00298	GDP_Man_Dehyd~Ribosomal_L11_N~Ribosomal_L11
XP_023395589.1	L. africana	892	potassium-transporting ATPase alpha chain 1	PF04505_PF00690_PF00122_PF00689	CD225~Cation_ATPase_N~E1-E2_ATPase~Cation_ATPase_C
XP_023399902.1	L. africana	417	zinc finger and SCAN domain-containing protein 21-like	PF02023_PF03221	SCAN~HTH_Tnp_Tc5
XP_023404449.1	L. africana	554	cystine/glutamate transporter isoform X1	PF13520_PF17490	AA_permease_2~Tnp_22_dsRBD
XP_023411414.1	L. africana	956	ankyrin repeat domain-containing protein 27	PF02204_PF00023_PF12796_PF13857_PF12796	VPS9~Ank~Ank_2~Ank_5~Ank_2
XP_004375173.1	T. manatus	4417	low-density lipoprotein receptor-related protein 1B	PF00057_PF00057_PF14670_PF00058_PF00058_PF14670_PF00057_PF00057_PF00057_PF00057_PF00057_PF00057_PF00057_PF14670_PF00058_PF00058_PF00058_PF14670_PF00058_PF00058_PF00058_PF00057_PF00057_PF00057_PF00057_PF00057_PF00057_PF00057_PF00057_PF00057_PF00058_PF14670_PF00057_PF00057_PF00057_PF00057_PF00057_PF00057_PF00057_PF00057_PF00057_PF00057_PF00057_PF00057_PF00058	Ldl_recept_a~Ldl_recept_a~FXa_inhibition~Ldl_recept_b~Ldl_recept_b~FXa_inhibition~Ldl_recept_a~Ldl_recept_a~Ldl_recept_a~Ldl_recept_a~Ldl_recept_a~Ldl_recept_a~Ldl_recept_a~FXa_inhibition~Ldl_recept_b~Ldl_recept_b~Ldl_recept_b~FXa_inhibition~Ldl_recept_b~Ldl_recept_b~Ldl_recept_b~Ldl_recept_a~Ldl_recept_a~Ldl_recept_a~Ldl_recept_a~Ldl_recept_a~Ldl_recept_a~Ldl_recept_a~Ldl_recept_a~Ldl_recept_a~L…
XP_004378456.1	T. manatus	2802	fibrillin-3	PF00683_PF07645_PF00683_PF07645_PF07645_PF07645_PF07645_PF00683_PF07645_PF07645_PF07645_PF00683_PF07645_PF00683_PF07645_PF07645_PF07645_PF07645_PF12662_PF07645_PF07645_PF12947_PF07645_PF07645_PF07645_PF00683_PF07645_PF07645_PF00683_PF07645_PF07645_PF07645_PF07645_PF07645_PF07645_PF07645_PF00683_PF07645_PF07645_PF07645_PF07645_PF07645_PF00683_PF07645_PF07645_PF07645_PF07645_PF07645_PF07645_PF07645	TB~EGF_CA~TB~EGF_CA~EGF_CA~EGF_CA~EGF_CA~TB~EGF_CA~EGF_CA~EGF_CA~TB~EGF_CA~TB~EGF_CA~EGF_CA~EGF_CA~EGF_CA~cEGF~EGF_CA~EGF_CA~EGF_3~EGF_CA~EGF_CA~EGF_CA~TB~EGF_CA~EGF_CA~TB~EGF_CA~EGF_CA~EGF_CA~EGF_CA~EGF_CA~EGF_CA~EGF_CA~TB~EGF_CA~EGF_CA~EGF_CA~EGF_CA~EGF_CA~TB~EGF_CA~EGF_CA~EGF_CA~EGF_CA~EGF_CA~EGF_CA~EGF_CA
XP_004390851.1	T. manatus	1988	neurogenic locus notch homolog protein 4 isoform X1	PF00008_PF00008_PF07645_PF00008_PF07645_PF07645_PF12661_PF00008_PF00008_PF00008_PF00008_PF00008_PF00008_PF00008_PF00008_PF00008_PF00066_PF00066_PF00066_PF06816_PF07684_PF12796	EGF~EGF~EGF_CA~EGF~EGF_CA~EGF_CA~hEGF~EGF~EGF~EGF~EGF~EGF~EGF~EGF~EGF~EGF~Notch~Notch~Notch~NOD~NODP~Ank_2
XP_012415344.2	T. manatus	902	contactin-associated protein-like 4	PF00754_PF00008_PF02210_PF02210	F5_F8_type_C~EGF~Laminin_G_2~Laminin_G_2
XP_023581461.1	T. manatus	799	zinc finger MYM-type protein 5	PF06467_PF06467_PF06467_PF04218_PF03221	zf-FCS~zf-FCS~zf-FCS~CENP-B_N~HTH_Tnp_Tc5
XP_023583674.1	T. manatus	849	band 4.1-like protein 2	PF09379_PF00373_PF08736_PF05902	FERM_N~FERM_M~FA~4_1_CTD
XP_023584725.1	T. manatus	1525	N-acetylglucosamine-1-phosphotransferase subunits alpha/beta isoform X1	PF17101_PF11380_PF00066_PF00066_PF06464_PF17102_PF17103_PF04803	Stealth_CR1~Stealth_CR2~Notch~Notch~DMAP_binding~Stealth_CR3~Stealth_CR4~Cor1
XP_023587211.1	T. manatus	427	protein transport protein Sec23A	PF04810_PF04815_PF00626	zf-Sec23_Sec24~Sec23_helical~Gelsolin
XP_023590572.1	T. manatus	1109	pro-epidermal growth factor	PF16472_PF07645_PF14670_PF00058_PF00058_PF00058_PF00058_PF07645	DUF5050~EGF_CA~FXa_inhibition~Ldl_recept_b~Ldl_recept_b~Ldl_recept_b~Ldl_recept_b~EGF_CA
XP_023591125.1	T. manatus	1165	zinc finger protein 853 isoform X3	PF14964_PF00096_PF00096	DUF4507~zf-C2H2~zf-C2H2
XP_023592017.1	T. manatus	1036	spastin isoform X1	PF00004_PF01545	AAA~Cation_efflux
XP_023592069.1	T. manatus	900	zinc finger protein 665 isoform X1	PF15005_PF01352_PF00096_PF00096_PF00096_PF00096_PF00096_PF00096_PF00096_PF00096_PF00096_PF00096_PF00096_PF00096	IZUMO~KRAB~zf-C2H2~zf-C2H2~zf-C2H2~zf-C2H2~zf-C2H2~zf-C2H2~zf-C2H2~zf-C2H2~zf-C2H2~zf-C2H2~zf-C2H2~zf-C2H2
XP_023595073.1	T. manatus	2457	E1A-binding protein p400	PF15790_PF07529_PF00271	EP400_N~HSA~Helicase_C
XP_023598531.1	T. manatus	358	testis-expressed protein 101	PF02023_PF00021	SCAN~UPAR_LY6
XP_007934060.1	O. afer	4408	PREDICTED: basement membrane-specific heparan sulfate proteoglycan core protein	PF00057_PF00057_PF00057_PF00057_PF13927_PF00052_PF00053_PF00053_PF00052_PF00053_PF00053_PF00052_PF00053_PF00053_PF13927_PF13927_PF07679_PF07679_PF13927_PF13927_PF13927_PF13927_PF07679_PF13927_PF13927_PF07679_PF07679_PF13927_PF07679_PF13927_PF07679_PF07679_PF07679_PF07679_PF07679_PF00054_PF00008_PF00054_PF00008_PF00054	Ldl_recept_a~Ldl_recept_a~Ldl_recept_a~Ldl_recept_a~Ig_3~Laminin_B~Laminin_EGF~Laminin_EGF~Laminin_B~Laminin_EGF~Laminin_EGF~Laminin_B~Laminin_EGF~Laminin_EGF~Ig_3~Ig_3~I-set~I-set~Ig_3~Ig_3~Ig_3~Ig_3~I-set~Ig_3~Ig_3~I-set~I-set~Ig_3~I-set~Ig_3~I-set~I-set~I-set~I-set~I-set~Laminin_G_1~EGF~Laminin_G_1~EGF~Laminin_G_1
XP_007938241.1	O. afer	1487	PREDICTED: slit homolog 1 protein	PF01462_PF13855_PF13855_PF01463_PF01462_PF13855_PF13855_PF13855_PF01462_PF13855_PF00008_PF00008_PF12661_PF00008_PF00008_PF02210	LRRNT~LRR_8~LRR_8~LRRCT~LRRNT~LRR_8~LRR_8~LRR_8~LRRNT~LRR_8~EGF~EGF~hEGF~EGF~EGF~Laminin_G_2
XP_007940728.1	O. afer	1200	PREDICTED: probable phospholipid-transporting ATPase IB	PF16209_PF00122_PF13246_PF00702_PF16212_PF13908	PhoLip_ATPase_N~E1-E2_ATPase~Cation_ATPase~Hydrolase~PhoLip_ATPase_C~Shisa
XP_007941342.1	O. afer	2971	PREDICTED: IgGFc-binding protein	PF17517_PF00094_PF08742_PF01826_PF12714_PF00094_PF08742_PF01826_PF12714_PF00094_PF08742_PF12714_PF00094_PF08742_PF01826_PF12714_PF00094_PF08742_PF01826_PF12714_PF00094_PF08742_PF01826_PF12714_PF00094	VWD~C8~TIL~TILa~VWD~C8~TIL~TILa~VWD~C8~TILa~VWD~C8~TIL~TILa~VWD~C8~TIL~TILa~VWD~C8~TIL~TILa~VWD
XP_007941368.1	O. afer	799	PREDICTED: transmembrane and TPR repeat-containing protein 1	PF08409_PF07719_PF13432_PF13424_PF14559_PF13414	DUF1736~TPR_2~TPR_16~TPR_12~TPR_19~TPR_11
XP_007942189.1	O. afer	938	PREDICTED: uncharacterized protein LOC103199669	PF00075_PF09337_PF00429	RNase_H~zf-H2C2~TLV_coat
XP_007944220.1	O. afer	1191	PREDICTED: uncharacterized protein LOC103201350	PF00078_PF00075_PF09337_PF00429	RVT_1~RNase_H~zf-H2C2~TLV_coat
XP_007947179.1	O. afer	533	PREDICTED: CD276 antigen isoform X1	PF07686_PF08205_PF07686_PF13927	V-set~C2-set_2~V-set~Ig_3
XP_007947541.1	O. afer	2980	PREDICTED: mucin-2	PF00094_PF08742_PF01826_PF00094_PF08742_PF01826_PF00094_PF08742_PF13330_PF13330_PF08742	VWD~C8~TIL~VWD~C8~TIL~VWD~C8~Mucin2_WxxW~Mucin2_WxxW~C8
XP_007948203.1	O. afer	4567	PREDICTED: prolow-density lipoprotein receptor-related protein 1	PF00057_PF00057_PF14670_PF00058_PF14670_PF00057_PF00057_PF00057_PF00057_PF00057_PF00057_PF00057_PF14670_PF00058_PF00058_PF00058_PF00058_PF00058_PF00058_PF00058_PF00057_PF00057_PF00057_PF00057_PF00057_PF00057_PF00057_PF00057_PF00057_PF00057_PF12662_PF16472_PF14670_PF00057_PF00057_PF00057_PF00057_PF00057_PF00057_PF00057_PF00057_PF00057_PF00057_PF00058_PF00058	Ldl_recept_a~Ldl_recept_a~FXa_inhibition~Ldl_recept_b~FXa_inhibition~Ldl_recept_a~Ldl_recept_a~Ldl_recept_a~Ldl_recept_a~Ldl_recept_a~Ldl_recept_a~Ldl_recept_a~FXa_inhibition~Ldl_recept_b~Ldl_recept_b~Ldl_recept_b~Ldl_recept_b~Ldl_recept_b~Ldl_recept_b~Ldl_recept_b~Ldl_recept_a~Ldl_recept_a~Ldl_recept_a~Ldl_recept_a~Ldl_recept_a~Ldl_recept_a~Ldl_recept_a~Ldl_recept_a~Ldl_recept_a~Ldl_recept_a~cEG…
XP_007949173.1	O. afer	869	PREDICTED: filaggrin-like	PF03516_PF03516_PF03516_PF01023	Filaggrin~Filaggrin~Filaggrin~S_100
XP_007949497.1	O. afer	1996	PREDICTED: neurogenic locus notch homolog protein 4 isoform X1	PF00008_PF00008_PF07645_PF00008_PF12661_PF07645_PF07645_PF00008_PF07645_PF00008_PF00008_PF00008_PF00008_PF00008_PF00008_PF00008_PF00008_PF00008_PF00066_PF00066_PF00066_PF07684_PF12796_PF13637	EGF~EGF~EGF_CA~EGF~hEGF~EGF_CA~EGF_CA~EGF~EGF_CA~EGF~EGF~EGF~EGF~EGF~EGF~EGF~EGF~EGF~Notch~Notch~Notch~NODP~Ank_2~Ank_4
XP_007949871.1	O. afer	774	PREDICTED: mRNA cap guanine-N7 methyltransferase	PF03291_PF02093	Pox_MCEL~Gag_p30
XP_007950387.1	O. afer	478	PREDICTED: transcription initiation factor TFIID subunit 7-like	PF04658_PF09026	TAFII55_N~CENP-B_dimeris
XP_007950731.1	O. afer	5205	PREDICTED: usherin isoform X1	PF13385_PF00055_PF00053_PF00053_PF00053_PF00053_PF00053_PF00053_PF00053_PF00053_PF00041_PF00041_PF00041_PF00054_PF02210_PF00041_PF00041_PF00041_PF00041_PF00041_PF00041_PF00041_PF00041_PF00041_PF00041_PF00041	Laminin_G_3~Laminin_N~Laminin_EGF~Laminin_EGF~Laminin_EGF~Laminin_EGF~Laminin_EGF~Laminin_EGF~Laminin_EGF~Laminin_EGF~fn3~fn3~fn3~Laminin_G_1~Laminin_G_2~fn3~fn3~fn3~fn3~fn3~fn3~fn3~fn3~fn3~fn3~fn3
XP_007951905.1	O. afer	2720	PREDICTED: fibrillin-3	PF00683_PF07645_PF00683_PF12662_PF00683_PF07645_PF07645_PF07645_PF00683_PF07645_PF00683_PF07645_PF07645_PF07645_PF07645_PF12662_PF07645_PF07645_PF07645_PF07645_PF07645_PF07645_PF00683_PF07645_PF07645_PF00683_PF07645_PF07645_PF07645_PF07645_PF07645_PF07645_PF07645_PF00683_PF07645_PF07645_PF07645_PF07645_PF07645_PF00683_PF07645_PF07645_PF07645_PF07645_PF07645_PF07645_PF07645	TB~EGF_CA~TB~cEGF~TB~EGF_CA~EGF_CA~EGF_CA~TB~EGF_CA~TB~EGF_CA~EGF_CA~EGF_CA~EGF_CA~cEGF~EGF_CA~EGF_CA~EGF_CA~EGF_CA~EGF_CA~EGF_CA~TB~EGF_CA~EGF_CA~TB~EGF_CA~EGF_CA~EGF_CA~EGF_CA~EGF_CA~EGF_CA~EGF_CA~TB~EGF_CA~EGF_CA~EGF_CA~EGF_CA~EGF_CA~TB~EGF_CA~EGF_CA~EGF_CA~EGF_CA~EGF_CA~EGF_CA~EGF_CA
XP_007951961.1	O. afer	1512	PREDICTED: slit homolog 2 protein	PF01462_PF13855_PF13855_PF01462_PF13855_PF13855_PF01462_PF13855_PF13855_PF01462_PF13855_PF00008_PF00008_PF00008_PF00008_PF12661_PF02210	LRRNT~LRR_8~LRR_8~LRRNT~LRR_8~LRR_8~LRRNT~LRR_8~LRR_8~LRRNT~LRR_8~EGF~EGF~EGF~EGF~hEGF~Laminin_G_2
XP_007952673.1	O. afer	917	PREDICTED: complement C3	PF01821_PF10569_PF07678_PF07677_PF01759	ANATO~Thiol-ester_cl~A2M_comp~A2M_recep~NTR
XP_007953867.1	O. afer	2633	PREDICTED: matrix-remodeling-associated protein 5	PF13855_PF13927_PF07679_PF07679_PF13927_PF07679_PF07679_PF13927_PF07679_PF00047_PF13927	LRR_8~Ig_3~I-set~I-set~Ig_3~I-set~I-set~Ig_3~I-set~ig~Ig_3
XP_007954078.1	O. afer	1045	PREDICTED: leucine-rich repeat and calponin homology domain-containing protein 4	PF13855_PF13855_PF00307_PF15476	LRR_8~LRR_8~CH~SAP25
XP_007954739.1	O. afer	551	PREDICTED: olfactory receptor 2J3-like	PF13853_PF02093	7tm_4~Gag_p30
XP_007955326.1	O. afer	528	PREDICTED: U2 small nuclear ribonucleoprotein auxiliary factor 35 kDa subunit-related protein 2	PF00642_PF00076_PF00428	zf-CCCH~RRM_1~Ribosomal_60s
XP_007956759.1	O. afer	908	PREDICTED: zinc finger BED domain-containing protein 1-like	PF02892_PF05699_PF00106	zf-BED~Dimer_Tnp_hAT~adh_short
XP_007957314.1	O. afer	520	PREDICTED: uncharacterized protein LOC103213290	PF00046_PF00046_PF15288_PF07686	Homeobox~Homeobox~zf-CCHC_6~V-set
XP_007957702.1	O. afer	111	PREDICTED: coiled-coil-helix-coiled-coil-helix domain-containing protein 5	PF16860_PF05676	CX9C~NDUF_B7
XP_006831102.1	C . asiatica	787	PREDICTED: RNA-binding protein 40	PF00076_PF03344	RRM_1~Daxx
XP_006832100.1	C . asiatica	1394	PREDICTED: probable phospholipid-transporting ATPase IB-like	PF16209_PF00122_PF13246_PF16212_PF00618	PhoLip_ATPase_N~E1-E2_ATPase~Cation_ATPase~PhoLip_ATPase_C~RasGEF_N
XP_006834660.1	C . asiatica	4606	PREDICTED: low-density lipoprotein receptor-related protein 1B-like	PF00057_PF00057_PF14670_PF00058_PF00058_PF14670_PF00057_PF00057_PF00057_PF00057_PF00057_PF00057_PF00057_PF14670_PF00058_PF00058_PF00058_PF14670_PF00058_PF00058_PF00058_PF00057_PF00057_PF00057_PF00057_PF00057_PF00057_PF00057_PF00057_PF00057_PF00057_PF12662_PF00058_PF14670_PF00057_PF00057_PF00057_PF00057_PF00057_PF00057_PF00057_PF00057_PF00057_PF00057_PF00057_PF07645	Ldl_recept_a~Ldl_recept_a~FXa_inhibition~Ldl_recept_b~Ldl_recept_b~FXa_inhibition~Ldl_recept_a~Ldl_recept_a~Ldl_recept_a~Ldl_recept_a~Ldl_recept_a~Ldl_recept_a~Ldl_recept_a~FXa_inhibition~Ldl_recept_b~Ldl_recept_b~Ldl_recept_b~FXa_inhibition~Ldl_recept_b~Ldl_recept_b~Ldl_recept_b~Ldl_recept_a~Ldl_recept_a~Ldl_recept_a~Ldl_recept_a~Ldl_recept_a~Ldl_recept_a~Ldl_recept_a~Ldl_recept_a~Ldl_recept_a~L…
XP_006835069.1	C . asiatica	816	PREDICTED: proprotein convertase subtilisin/kexin type 5	PF14843_PF01352	GF_recep_IV~KRAB
XP_006835763.1	C . asiatica	735	PREDICTED: protein Shroom2	PF08687_PF13903	ASD2~Claudin_2
XP_006861091.1	C . asiatica	460	PREDICTED: tetraspanin-32	PF00335_PF03247	Tetraspannin~Prothymosin
XP_006868617.1	C . asiatica	825	PREDICTED: UDP-N-acetylglucosamine--peptide N-acetylglucosaminyltransferase 110 kDa subunit	PF13414_PF13181_PF00515_PF13424_PF13844	TPR_11~TPR_8~TPR_1~TPR_12~Glyco_transf_41
XP_006868715.1	C . asiatica	281	PREDICTED: uncharacterized protein LOC102823990	PF00838_PF00010	TCTP~HLH
XP_006868773.1	C . asiatica	1310	PREDICTED: uncharacterized protein LOC102833547	PF02093_PF01140_PF02093_PF00078_PF00075	Gag_p30~Gag_MA~Gag_p30~RVT_1~RNase_H
XP_006869073.1	C . asiatica	1322	PREDICTED: complement C3	PF01835_PF07703_PF01821_PF07678_PF07677_PF01759	A2M_N~A2M_N_2~ANATO~A2M_comp~A2M_recep~NTR
XP_006871121.1	C . asiatica	618	PREDICTED: uncharacterized protein LOC102835003	PF15186_PF03920	TEX13~TLE_N
XP_006871134.1	C . asiatica	571	PREDICTED: nucleosome assembly protein 1-like 1-like	PF15623_PF00956	CT47~NAP
XP_006871651.1	C . asiatica	526	PREDICTED: ras association domain-containing protein 6	PF00237_PF00788_PF16517	Ribosomal_L22~RA~Nore1-SARAH
XP_006872927.1	C . asiatica	936	PREDICTED: piggyBac transposable element-derived protein 2-like	PF02023_PF13843_PF04589	SCAN~DDE_Tnp_1_7~RFX1_trans_act
XP_006874890.1	C . asiatica	628	PREDICTED: leucine zipper putative tumor suppressor 3-like	PF08614_PF06818	ATG16~Fez1
XP_006876408.1	C . asiatica	795	PREDICTED: armadillo repeat-containing protein 6	PF00514_PF00153_PF00153_PF00153	Arm~Mito_carr~Mito_carr~Mito_carr
XP_006877529.1	C . asiatica	503	PREDICTED: olfactory receptor 7G2-like	PF02337_PF13853	Gag_p10~7tm_4
XP_006877995.1	C . asiatica	462	PREDICTED: olfactory receptor 14I1-like	PF02376_PF13853	CUT~7tm_4
XP_006879905.1	E. edwardii	327	PREDICTED: ubiquitin-conjugating enzyme E2 U	PF00179_PF00338	UQ_con~Ribosomal_S10
XP_006880204.1	E. edwardii	1153	PREDICTED: inactive carboxypeptidase-like protein X2	PF00210_PF00754_PF00246_PF13620	Ferritin~F5_F8_type_C~Peptidase_M14~CarboxypepD_reg
XP_006882247.1	E. edwardii	1051	PREDICTED: pre-mRNA-processing factor 6-like	PF14559_PF05794	TPR_19~Tcp11
XP_006884574.1	E. edwardii	1530	PREDICTED: slit homolog 2 protein	PF01462_PF13855_PF13855_PF01462_PF13855_PF01462_PF13855_PF13855_PF01462_PF13855_PF00008_PF00008_PF00008_PF00008_PF00008_PF00054_PF00008	LRRNT~LRR_8~LRR_8~LRRNT~LRR_8~LRRNT~LRR_8~LRR_8~LRRNT~LRR_8~EGF~EGF~EGF~EGF~EGF~Laminin_G_1~EGF
XP_006884959.1	E. edwardii	363	PREDICTED: arylamine N-acetyltransferase 2-like	PF00797_PF00096_PF00096	Acetyltransf_2~zf-C2H2~zf-C2H2
XP_006886008.1	E. edwardii	641	PREDICTED: amiloride-sensitive sodium channel subunit delta	PF00858_PF01194	ASC~RNA_pol_N
XP_006886030.1	E. edwardii	562	PREDICTED: homer protein homolog 3	PF16906_PF00467_PF00568	Ribosomal_L26~KOW~WH1
XP_006887303.1	E. edwardii	559	PREDICTED: uncharacterized protein LOC102865261	PF07686_PF07686_PF02798_PF07686	V-set~V-set~GST_N~V-set
XP_006887341.1	E. edwardii	507	PREDICTED: zinc finger protein 212	PF12417_PF01352_PF13465	DUF3669~KRAB~zf-H2C2_2
XP_006887415.1	E. edwardii	579	PREDICTED: stromelysin-2	PF00413_PF00045_PF00045_PF00045_PF00045_PF01253	Peptidase_M10~Hemopexin~Hemopexin~Hemopexin~Hemopexin~SUI1
XP_006888734.1	E. edwardii	464	PREDICTED: uncharacterized protein LOC102843403	PF00125_PF13564_PF00125	Histone~DoxX_2~Histone
XP_006889653.1	E. edwardii	1648	PREDICTED: superkiller viralicidic activity 2-like 2	PF07531_PF05236_PF00271_PF13234_PF08148	TAFH~TAF4~Helicase_C~rRNA_proc-arch~DSHCT
XP_006890250.1	E. edwardii	2078	PREDICTED: histone acetyltransferase p300	PF02135_PF02172_PF00439_PF06001_PF00569_PF02135	zf-TAZ~KIX~Bromodomain~DUF902~ZZ~zf-TAZ
XP_006890812.1	E. edwardii	1962	PREDICTED: complement C5	PF01835_PF01821_PF01835_PF07703_PF01821_PF00207_PF07678_PF07677_PF01759	A2M_N~ANATO~A2M_N~A2M_N_2~ANATO~A2M~A2M_comp~A2M_recep~NTR
XP_006893417.1	E. edwardii	2690	PREDICTED: mucin-5AC	PF00094_PF08742_PF01826_PF00094_PF08742_PF01826_PF00094_PF08742_PF13330_PF13330_PF13330_PF00094_PF08742_PF01826_PF00093	VWD~C8~TIL~VWD~C8~TIL~VWD~C8~Mucin2_WxxW~Mucin2_WxxW~Mucin2_WxxW~VWD~C8~TIL~VWC
XP_006893886.1	E. edwardii	215	PREDICTED: testis-expressed sequence 13A protein-like	PF15186_PF03719	TEX13~Ribosomal_S5_C
XP_006893940.1	E. edwardii	4281	PREDICTED: polycystin-1	PF13855_PF01822_PF00059_PF00801_PF00801_PF00801_PF00801_PF00801_PF00801_PF00801_PF00801_PF00801_PF00801_PF00801_PF00801_PF00801_PF02010_PF01477_PF08016	LRR_8~WSC~Lectin_C~PKD~PKD~PKD~PKD~PKD~PKD~PKD~PKD~PKD~PKD~PKD~PKD~PKD~REJ~PLAT~PKD_channel
XP_006894207.1	E. edwardii	449	PREDICTED: malate dehydrogenase, mitochondrial-like	PF00428_PF00056_PF02866	Ribosomal_60s~Ldh_1_N~Ldh_1_C
XP_006894208.1	E. edwardii	682	PREDICTED: vitamin K-dependent protein S	PF00594_PF00008_PF12662_PF00054_PF02210	Gla~EGF~cEGF~Laminin_G_1~Laminin_G_2
XP_006894521.1	E. edwardii	1622	PREDICTED: thrombospondin type-1 domain-containing protein 7B-like	PF09072_PF00090_PF00090_PF00090_PF00090_PF00090	TMA7~TSP_1~TSP_1~TSP_1~TSP_1~TSP_1
XP_006895420.1	E. edwardii	1352	PREDICTED: sodium/hydrogen exchanger 10	PF00999_PF00027_PF15666	Na_H_Exchanger~cNMP_binding~HGAL
XP_006896320.1	E. edwardii	1996	PREDICTED: neurogenic locus notch homolog protein 4	PF07645_PF07645_PF07645_PF00008_PF07645_PF00008_PF00008_PF00008_PF00008_PF00008_PF00008_PF00008_PF00066_PF00066_PF00066_PF06816_PF07684_PF12796_PF13637	EGF_CA~EGF_CA~EGF_CA~EGF~EGF_CA~EGF~EGF~EGF~EGF~EGF~EGF~EGF~Notch~Notch~Notch~NOD~NODP~Ank_2~Ank_4
XP_006896470.1	E. edwardii	709	PREDICTED: EGF-like module-containing mucin-like hormone receptor-like 3-like	PF01092_PF07645_PF01825_PF00002	Ribosomal_S6e~EGF_CA~GPS~7tm_2
XP_006896489.1	E. edwardii	307	PREDICTED: heterogeneous nuclear ribonucleoprotein L-like	PF00338_PF13893	Ribosomal_S10~RRM_5
XP_006896713.1	E. edwardii	1228	PREDICTED: potassium channel subfamily U member 1	PF00520_PF03493_PF00428	Ion_trans~BK_channel_a~Ribosomal_60s
XP_006897432.1	E. edwardii	1184	PREDICTED: leukocyte immunoglobulin-like receptor subfamily B member 3	PF13895_PF00047_PF13895_PF13895_PF00047_PF13895_PF00047	Ig_2~ig~Ig_2~Ig_2~ig~Ig_2~ig
XP_006897540.1	E. edwardii	938	PREDICTED: ubiquitin carboxyl-terminal hydrolase 7-like	PF00917_PF00443_PF12436_PF02135	MATH~UCH~USP7_ICP0_bdg~zf-TAZ
XP_006898211.1	E. edwardii	249	PREDICTED: protein chibby homolog 3	PF00631_PF14645	G-gamma~Chibby
XP_006898370.1	E. edwardii	638	PREDICTED: sodium/iodide cotransporter	PF00474_PF00935	SSF~Ribosomal_L44
XP_006898661.1	E. edwardii	428	PREDICTED: uncharacterized protein C4orf19-like	PF02518_PF15770	HATPase_c~DUF4699
XP_006898868.1	E. edwardii	3742	PREDICTED: mucin-16-like	PF01390_PF01390_PF01390_PF00378_PF01390_PF01390_PF01390_PF01390_PF01390_PF01390_PF01390_PF01390_PF01390_PF01390_PF01390_PF01390_PF01390	SEA~SEA~SEA~ECH_1~SEA~SEA~SEA~SEA~SEA~SEA~SEA~SEA~SEA~SEA~SEA~SEA~SEA
XP_006898914.1	E. edwardii	848	PREDICTED: dedicator of cytokinesis protein 6-like	PF01198_PF11878	Ribosomal_L31e~DUF3398
XP_006899095.1	E. edwardii	1394	PREDICTED: rho guanine nucleotide exchange factor 28-like	PF00130_PF00621_PF00169	C1_1~RhoGEF~PH
XP_006899795.1	E. edwardii	254	PREDICTED: transcription factor IIIA-like	PF02038_PF00096	ATP1G1_PLM_MAT8~zf-C2H2
XP_006900058.1	E. edwardii	576	PREDICTED: uncharacterized protein LOC102852469	PF13853_PF09341	7tm_4~Pcc1
XP_006900796.1	E. edwardii	270	PREDICTED: ras-related protein Rab-2A-like	PF01283_PF00071	Ribosomal_S26e~Ras
XP_006902111.1	E. edwardii	497	PREDICTED: uncharacterized protein LOC102863233	PF01907_PF00076_PF12196	Ribosomal_L37e~RRM_1~hNIFK_binding
XP_006903146.1	E. edwardii	405	PREDICTED: F-box/LRR-repeat protein 20-like	PF12937_PF05365	F-box-like~UCR_UQCRX_QCR9
XP_006903199.1	E. edwardii	359	PREDICTED: homeobox protein NANOG-like	PF00046_PF00240	Homeobox~ubiquitin
XP_006903359.1	E. edwardii	1073	PREDICTED: uncharacterized protein LOC102848538	PF01454_PF12440_PF01454_PF12440_PF01454	MAGE~MAGE_N~MAGE~MAGE_N~MAGE
XP_004700058.1	E. telfairi	800	PREDICTED: transmembrane and TPR repeat-containing protein 1	PF08409_PF07719_PF13432_PF14559_PF13432	DUF1736~TPR_2~TPR_16~TPR_19~TPR_16
XP_004700726.1	E. telfairi	403	PREDICTED: neuronal pentraxin receptor	PF00354_PF01221	Pentaxin~Dynein_light
XP_004701276.1	E. telfairi	764	PREDICTED: undifferentiated embryonic cell transcription factor 1	PF13837_PF00046	Myb_DNA-bind_4~Homeobox
XP_004702227.1	E. telfairi	181	PREDICTED: sorting nexin-3	PF01283_PF00787	Ribosomal_S26e~PX
XP_004704014.1	E. telfairi	4417	PREDICTED: low-density lipoprotein receptor-related protein 1B	PF00057_PF00057_PF07645_PF00058_PF00058_PF00058_PF00058_PF00057_PF00057_PF00057_PF00057_PF00057_PF00057_PF00057_PF00058_PF00058_PF00058_PF00058_PF00058_PF14670_PF00058_PF00057_PF00057_PF00057_PF00057_PF00057_PF00057_PF00057_PF00057_PF00057_PF00057_PF12662_PF16472_PF14670_PF00057_PF00057_PF00057_PF00057_PF00057_PF00057_PF00057_PF00057_PF00057_PF00057_PF00057_PF00058_PF00008	Ldl_recept_a~Ldl_recept_a~EGF_CA~Ldl_recept_b~Ldl_recept_b~Ldl_recept_b~Ldl_recept_b~Ldl_recept_a~Ldl_recept_a~Ldl_recept_a~Ldl_recept_a~Ldl_recept_a~Ldl_recept_a~Ldl_recept_a~Ldl_recept_b~Ldl_recept_b~Ldl_recept_b~Ldl_recept_b~Ldl_recept_b~FXa_inhibition~Ldl_recept_b~Ldl_recept_a~Ldl_recept_a~Ldl_recept_a~Ldl_recept_a~Ldl_recept_a~Ldl_recept_a~Ldl_recept_a~Ldl_recept_a~Ldl_recept_a~Ldl_recept_a~…
XP_004705438.1	E. telfairi	178	PREDICTED: cytidine deaminase	PF00383_PF01781	dCMP_cyt_deam_1~Ribosomal_L38e
XP_004706389.1	E. telfairi	355	PREDICTED: phosducin-like protein 2	PF02070_PF02114	NMU~Phosducin
XP_004706679.2	E. telfairi	345	PREDICTED: inversin-like	PF07392_PF12796	P19Arf_N~Ank_2
XP_004707728.1	E. telfairi	1870	PREDICTED: ankyrin-1	PF12796_PF12796_PF12796_PF12796_PF12796_PF13606_PF12796_PF12796_PF13637_PF00791_PF00531	Ank_2~Ank_2~Ank_2~Ank_2~Ank_2~Ank_3~Ank_2~Ank_2~Ank_4~ZU5~Death
XP_004708703.1	E. telfairi	2548	PREDICTED: immunoglobulin superfamily member 10	PF13855_PF07679_PF13927_PF07679_PF07679_PF07679_PF13927_PF07679_PF00047_PF07679_PF07679_PF13927_PF13927	LRR_8~I-set~Ig_3~I-set~I-set~I-set~Ig_3~I-set~ig~I-set~I-set~Ig_3~Ig_3
XP_004709350.1	E. telfairi	1096	PREDICTED: caskin-2	PF12796_PF13637_PF12796_PF07653_PF16907_PF16632	Ank_2~Ank_4~Ank_2~SH3_2~Caskin-Pro-rich~Caskin-tail
XP_004710879.2	E. telfairi	396	PREDICTED: cyclin-dependent kinase inhibitor 1	PF01200_PF02234	Ribosomal_S28e~CDI
XP_004710935.1	E. telfairi	983	PREDICTED: cell division cycle 5-like protein	PF15160_PF13921_PF11831	SASRP1~Myb_DNA-bind_6~Myb_Cef
XP_004710990.1	E. telfairi	1284	PREDICTED: protein MMS22-like	PF14910_PF13499_PF14911	MMS22L_N~EF-hand_7~MMS22L_C
XP_004711869.1	E. telfairi	2002	PREDICTED: neurogenic locus notch homolog protein 4	PF07645_PF00008_PF07645_PF07645_PF00008_PF07645_PF00008_PF00008_PF00008_PF00008_PF00008_PF00008_PF00008_PF00008_PF00066_PF00066_PF00066_PF07684_PF12796_PF13637	EGF_CA~EGF~EGF_CA~EGF_CA~EGF~EGF_CA~EGF~EGF~EGF~EGF~EGF~EGF~EGF~EGF~Notch~Notch~Notch~NODP~Ank_2~Ank_4
XP_004711874.1	E. telfairi	825	PREDICTED: butyrophilin-like protein 1	PF07686_PF00622_PF13765_PF00622	V-set~SPRY~PRY~SPRY
XP_004712924.1	E. telfairi	764	PREDICTED: ankyrin repeat and protein kinase domain-containing protein 1	PF07714_PF13637_PF12796_PF13637_PF12796_PF12796	Pkinase_Tyr~Ank_4~Ank_2~Ank_4~Ank_2~Ank_2
XP_004717498.2	E. telfairi	1730	PREDICTED: ovostatin homolog 2-like	PF01835_PF07703_PF00207_PF10569_PF07678_PF07677_PF01835	A2M_N~A2M_N_2~A2M~Thiol-ester_cl~A2M_comp~A2M_recep~A2M_N
XP_012859110.1	E. telfairi	502	PREDICTED: estrogen receptor beta	PF12497_PF00104	ERbeta_N~Hormone_recep
XP_012859293.1	E. telfairi	455	PREDICTED: single-stranded DNA-binding protein 3	PF01198_PF04503	Ribosomal_L31e~SSDP
XP_012859492.1	E. telfairi	454	PREDICTED: DNA dC-_dU-editing enzyme APOBEC-3F-like	PF05240_PF08210_PF05240	APOBEC_C~APOBEC_N~APOBEC_C
XP_012860004.1	E. telfairi	834	PREDICTED: ATP-dependent 6-phosphofructokinase, platelet type	PF00365_PF00505_PF00365	PFK~HMG_box~PFK
XP_012860404.1	E. telfairi	4612	PREDICTED: low-density lipoprotein receptor-related protein 2	PF00057_PF00057_PF00057_PF00057_PF00057_PF00057_PF00058_PF00058_PF00057_PF00057_PF00057_PF00057_PF00057_PF00057_PF00057_PF14670_PF07645_PF00058_PF00058_PF00058_PF14670_PF00058_PF16472_PF00057_PF00057_PF00057_PF00057_PF00057_PF00057_PF00057_PF00057_PF00057_PF00057_PF12662_PF00058_PF00058_PF00058_PF00058_PF00057_PF00057_PF00057_PF00057_PF00057_PF00057_PF00057_PF00057_PF00057_PF00057_PF00057_PF07645…	Ldl_recept_a~Ldl_recept_a~Ldl_recept_a~Ldl_recept_a~Ldl_recept_a~Ldl_recept_a~Ldl_recept_b~Ldl_recept_b~Ldl_recept_a~Ldl_recept_a~Ldl_recept_a~Ldl_recept_a~Ldl_recept_a~Ldl_recept_a~Ldl_recept_a~FXa_inhibition~EGF_CA~Ldl_recept_b~Ldl_recept_b~Ldl_recept_b~FXa_inhibition~Ldl_recept_b~DUF5050~Ldl_recept_a~Ldl_recept_a~Ldl_recept_a~Ldl_recept_a~Ldl_recept_a~Ldl_recept_a~Ldl_recept_a~Ldl_recept_a~Ldl…
XP_012860706.1	E. telfairi	4587	PREDICTED: pericentrin	PF10495_PF06464_PF00501_PF00501	PACT_coil_coil~DMAP_binding~AMP-binding~AMP-binding
XP_012861030.1	E. telfairi	594	PREDICTED: transmembrane protease serine 11D	PF01390_PF16897_PF00089	SEA~MMR_HSR1_Xtn~Trypsin
XP_012861799.1	E. telfairi	305	PREDICTED: uncharacterized protein LOC105979215	PF00334_PF07679	NDK~I-set
XP_012861909.1	E. telfairi	1093	PREDICTED: F-box only protein 40	PF00046_PF15965_PF15966	Homeobox~zf-TRAF_2~F-box_4
XP_012862076.1	E. telfairi	1712	PREDICTED: symplekin	PF11935_PF12295_PF04712	DUF3453~Symplekin_C~Radial_spoke
XP_012862082.1	E. telfairi	368	PREDICTED: serine/threonine-protein phosphatase 5	PF00515_PF00149	TPR_1~Metallophos
XP_012862137.1	E. telfairi	1054	PREDICTED: L-amino-acid oxidase	PF05064_PF01593	Nsp1_C~Amino_oxidase
XP_012862153.1	E. telfairi	221	PREDICTED: sialic acid-binding Ig-like lectin 12	PF07686_PF00137	V-set~ATP-synt_C
XP_012862831.1	E. telfairi	4688	PREDICTED: hemicentin-2	PF13927_PF07679_PF13927_PF07679_PF07679_PF13927_PF13927_PF13927_PF07679_PF07679_PF07679_PF13927_PF13927_PF07679_PF07679_PF13927_PF07679_PF07679_PF07679_PF07679_PF07679_PF13927_PF07679_PF07679_PF07679_PF07679_PF13927_PF07679_PF07679_PF00047_PF07679_PF07679_PF07679_PF13927_PF07679_PF07679_PF07474_PF12662_PF07645_PF07645_PF12662	Ig_3~I-set~Ig_3~I-set~I-set~Ig_3~Ig_3~Ig_3~I-set~I-set~I-set~Ig_3~Ig_3~I-set~I-set~Ig_3~I-set~I-set~I-set~I-set~I-set~Ig_3~I-set~I-set~I-set~I-set~Ig_3~I-set~I-set~ig~I-set~I-set~I-set~Ig_3~I-set~I-set~G2F~cEGF~EGF_CA~EGF_CA~cEGF
XP_012862894.1	E. telfairi	1355	PREDICTED: mitogen-activated protein kinase kinase kinase kinase 2	PF05053_PF07714_PF00780	Menin~Pkinase_Tyr~CNH
XP_012863099.1	E. telfairi	780	PREDICTED: uncharacterized protein LOC101638639	PF07686_PF00530_PF00002	V-set~SRCR~7tm_2
XP_012863354.1	E. telfairi	840	PREDICTED: M-phase phosphoprotein 8-like	PF00385_PF12796_PF13606	Chromo~Ank_2~Ank_3
XP_012863362.1	E. telfairi	1194	PREDICTED: uncharacterized protein LOC101641064	PF15372_PF00010_PF03607_PF00069	DUF4600~HLH~DCX~Pkinase
XP_012863452.1	E. telfairi	418	PREDICTED: platelet glycoprotein VI	PF00106_PF13895	adh_short~Ig_2
XP_012863707.1	E. telfairi	649	PREDICTED: ovochymase-2	PF00089_PF00431_PF00431_PF02937	Trypsin~CUB~CUB~COX6C

## Sheet: S4B-functionaldomain
Table S4B: List of domain repeats showing unique domain combination in Afrotheria
Yellow Box highlights examples where tandem occurrence of the repeat domains have not been not observed.
Protein RefSeq ID	Species	Protein length (aa)	Protein description	Domain architecture	Architecture represented by domain description	Repeating domain in the architecture	Repeating domain name	Domain type (as defined by Pfam)
XP_003411777.1	L. africana	114	elafin	PF10511_PF10511_PF00095	Cementoin~Cementoin~WAP	PF10511	Cementoin	Family
XP_023395025.1	L. africana	394	4-hydroxyphenylpyruvate dioxygenase	PF00903_PF00903	Glyoxalase~Glyoxalase	PF00903	Glyoxalase	Domain
XP_023396935.1	L. africana	880	uncharacterized protein LOC100672101	PF09162_PF09162_PF02136	Tap-RNA_bind~Tap-RNA_bind~NTF2	PF09162	Tap-RNA_bind	Domain
XP_023397933.1	L. africana	319	inducible T-cell costimulator isoform X1	PF15910_PF15910	V-set_2~V-set_2	PF15910	V-set_2	Domain
XP_023402695.1	L. africana	1178	tankyrase-2 isoform X1	PF12796_PF13637_PF12796_PF00023_PF00023_PF12796_PF12796_PF13637_PF13637_PF13857_PF07647_PF00644	Ank_2~Ank_4~Ank_2~Ank~Ank~Ank_2~Ank_2~Ank_4~Ank_4~Ank_5~SAM_2~PARP	PF00023	Ank	Repeat
XP_023404815.1	L. africana	825	probable 28S rRNA (cytosine(4447)-C(5))-methyltransferase	PF17125_PF01189_PF08062_PF08062	Methyltr_RsmF_N~Methyltr_RsmB-F~P120R~P120R	PF08062	P120R	Repeat
XP_023408055.1	L. africana	1231	A-kinase anchor protein 8-like isoform X1	PF04988_PF04988	AKAP95~AKAP95	PF04988	AKAP95	Family
XP_010601160.1	L. africana	1316	tetratricopeptide repeat protein 21B isoform X1	PF14559_PF14559	TPR_19~TPR_19	PF14559	TPR_19	Domain
XP_023589138.1	T. manatus	1280	uncharacterized protein LOC101353155 isoform X1	PF02263_PF02841_PF02263_PF02841	GBP~GBP_C~GBP~GBP_C	PF02263,PF02841	GBP,GBP_C	Domain,Domain
XP_023589145.1	T. manatus	1318	uncharacterized protein LOC101358841 isoform X1	PF02263_PF02841_PF02263_PF02841	GBP~GBP_C~GBP~GBP_C	PF02263,PF02841	GBP,GBP_C	Domain,Domain
XP_007933747.1	O. afer	801	PREDICTED: dynactin-associated protein	PF15675_PF00190_PF00190_PF15675	CLLAC~Cupin_1~Cupin_1~CLLAC	PF00190	Cupin_1	Domain
XP_007937870.1	O. afer	292	PREDICTED: zymogen granule membrane protein 16-like	PF01419_PF01419	Jacalin~Jacalin	PF01419	Jacalin	Domain
XP_007940858.1	O. afer	271	PREDICTED: natriuretic peptides A-like	PF00212_PF00212	ANP~ANP	PF00212	ANP	Family
XP_007941001.1	O. afer	275	PREDICTED: alpha-S2-casein-like	PF00363_PF00363	Casein~Casein	PF00363	Casein	Family
XP_007943880.1	O. afer	720	PREDICTED: leucine-rich repeat flightless-interacting protein 2 isoform X1	PF09738_PF09738	LRRFIP~LRRFIP	PF09738	LRRFIP	Family
XP_007948616.1	O. afer	871	PREDICTED: chitinase-3-like protein 2	PF00704_PF00704_PF01607	Glyco_hydro_18~Glyco_hydro_18~CBM_14	PF00704	Glyco_hydro_18	Domain
XP_007956066.1	O. afer	170	PREDICTED: neutrophil antibiotic peptide NP-1-like	PF00879_PF00879_PF00323	Defensin_propep~Defensin_propep~Defensin_1	PF00879	Defensin_propep	Family
XP_006868465.1	C. asiatica	1299	PREDICTED: uncharacterized protein LOC102832911	PF00209_PF00209	SNF~SNF	PF00209	SNF	Family
XP_006868773.1	C. asiatica	1310	PREDICTED: uncharacterized protein LOC102833547	PF02093_PF01140_PF02093_PF00078_PF00075	Gag_p30~Gag_MA~Gag_p30~RVT_1~RNase_H	PF02093	Gag_p30	Family
XP_006874640.1	C. asiatica	1449	PREDICTED: spermatogenesis-associated protein 31A6-like	PF15371_PF15371_PF14650	DUF4599~DUF4599~FAM75	PF15371	DUF4599	Family
XP_006876014.1	C. asiatica	1027	PREDICTED: centriolar coiled-coil protein of 110 kDa isoform X1	PF16025_PF16025	CALM_bind~CALM_bind	PF16025	CALM_bind	Family
XP_006878929.1	E. edwardii	5069	PREDICTED: hydrocephalus-inducing protein homolog	PF15780_PF17213_PF15780	ASH~Hydin_ADK~ASH	PF15780	ASH	Domain
XP_006890812.1	E. edwardii	1962	PREDICTED: complement C5	PF01835_PF01821_PF01835_PF07703_PF01821_PF00207_PF07678_PF07677_PF01759	A2M_N~ANATO~A2M_N~A2M_N_2~ANATO~A2M~A2M_comp~A2M_recep~NTR	PF01821	ANATO	Domain
XP_006890989.1	E. edwardii	704	PREDICTED: mitochondrial Rho GTPase 1 isoform X1	PF00071_PF08356_PF08355_PF00071	Ras~EF_assoc_2~EF_assoc_1~Ras	PF00071	Ras	Domain
XP_006893706.1	E. edwardii	1626	PREDICTED: diacylglycerol kinase theta	PF00130_PF00130_PF00788_PF00781_PF00788_PF00781_PF00609	C1_1~C1_1~RA~DAGK_cat~RA~DAGK_cat~DAGK_acc	PF00781	DAGK_cat	Family
XP_006898528.1	E. edwardii	218	PREDICTED: platelet basic protein-like	PF00048_PF00048	IL8~IL8	PF00048	IL8	Domain
XP_006898640.1	E. edwardii	2976	PREDICTED: myosin-8	PF02736_PF00063_PF01576_PF02736_PF00063_PF01576	Myosin_N~Myosin_head~Myosin_tail_1~Myosin_N~Myosin_head~Myosin_tail_1	PF02736	Myosin_N	Domain
XP_012859492.1	E. telfairi	454	PREDICTED: DNA dC-_dU-editing enzyme APOBEC-3F-like	PF05240_PF08210_PF05240	APOBEC_C~APOBEC_N~APOBEC_C	PF05240	APOBEC_C	Domain
XP_012861843.1	E. telfairi	1470	PREDICTED: disintegrin and metalloproteinase domain-containing protein 1-like	PF01562_PF01421_PF00200_PF08516_PF01562_PF01421_PF00200_PF08516	Pep_M12B_propep~Reprolysin~Disintegrin~ADAM_CR~Pep_M12B_propep~Reprolysin~Disintegrin~ADAM_CR	PF01562,PF01421,PF00200,PF08516	Pep_M12B_propep,Reprolysin,Disintegrin,ADAM_CR	Family,Domain,Domain,Family
XP_012862364.1	E. telfairi	728	PREDICTED: keratin, type II cytoskeletal 1b-like	PF00038_PF16208_PF00038	Filament~Keratin_2_head~Filament	PF00038	Filament	Family
XP_012863763.1	E. telfairi	651	PREDICTED: uncharacterized protein LOC101652329	PF00643_PF13765_PF13765_PF00622	zf-B_box~PRY~PRY~SPRY	PF13765	PRY	Family
XP_004710375.1	E. telfairi	1080	PREDICTED: transcription elongation factor SPT5 isoform X1	PF11942_PF03439_PF00467_PF00467	Spt5_N~Spt5-NGN~KOW~KOW	PF00467	KOW	Family
XP_004715724.2	E. telfairi	569	PREDICTED: vomeronasal type-1 receptor 2-like	PF03402_PF03402	V1R~V1R	PF03402	V1R	Family
XP_004717087.1	E. telfairi	719	PREDICTED: transcription factor E2-alpha	PF00010_PF00010	HLH~HLH	PF00010	HLH	Domain
